# Supplementary material for: Activation, Inhibition, or Something Else: An Exploratory Study on Response Priming Using Moving Dots as Primes in Middle-Aged and Old Adults
Source: J Aging Res. 2018 Jun 19;2018:7432602. doi: 10.1155/2018/7432602 (PMC6029502; doi:10.1155/2018/7432602)
Supplement: Supplementary Materials — As supplementary material, we provide the original raw data for all participants. (i) Trials 1–12: practice trials; (ii) Sex = sex (maennlich = male; weiblich = female); (iii) arrow direction: Target = links.bmp = leftwards; Target = rechts.bmp = rightwards; (iv) prime direction: Procedure = rechts = rightwards, Procedure = links = leftwards, Procedure = neutralInnen = neutral inwards, Procedure = neutralAussen = neutral outwards; (v) SOA: ExperimentName ≫ _150 versus _360; (vi) motion type: ExperimentName ≫ row-of-dots = S1 and S2 and single-dot S_P1 and S_P2; (vii) reaction time in each trial: Target.RT; and (viii) correctness of response in each trial: Target.ACC. [file 7432602.f1.txt]

Information to supplementary data of Bermeitinger & Kappes

�	Trial 1-12: practice trials
�	Sex = sex (maennlich = male; weiblich = female)
�	arrow direction: Target = links.bmp = leftwards; Target = rechts.bmp = rightwards
�	prime direction: Procedure = rechts = rightwards; Procedure = links = leftwards; Procedure = neutralInnen = neutral inwards; Procedure = neutralAussen = neutral outwards
�	SOA: ExperimentName >> _150 vs. _360
�	motion type: ExperimentName >> row-of-dots = S1 and S2; single-dot S_P1 and S_P2
�	reaction time in each trial: Target.RT
�	correctness of response in each trial: Target.ACC


ExperimentName	Subject	Age	Handedness	Sex	Trial	Answer	Condition	Procedure	Running	Target	Target.ACC	Target.CRESP	Target.OnsetTime	Target.RESP	Target.RT	Target.RTTime
RespPr_MoveS1_150	1	74	rechts	maennlich	1	3	neuAussen	neutralAussen	List1	rechts.bmp	1	3	140674	3	2978	143652
RespPr_MoveS1_150	1	74	rechts	maennlich	2	3	rel	rechts	List1	rechts.bmp	1	3	145233	3	603	145836
RespPr_MoveS1_150	1	74	rechts	maennlich	3	3	neuInnen	neutralInnen	List1	rechts.bmp	1	3	147419	3	441	147860
RespPr_MoveS1_150	1	74	rechts	maennlich	4	1	unrel	rechts	List1	links.bmp	1	1	149458	1	402	149860
RespPr_MoveS1_150	1	74	rechts	maennlich	5	1	neuAussen	neutralAussen	List1	links.bmp	1	1	151444	1	352	151796
RespPr_MoveS1_150	1	74	rechts	maennlich	6	1	unrel	rechts	List1	links.bmp	1	1	153377	1	387	153764
RespPr_MoveS1_150	1	74	rechts	maennlich	7	1	rel	links	List1	links.bmp	1	1	155350	1	342	155692
RespPr_MoveS1_150	1	74	rechts	maennlich	8	3	rel	rechts	List1	rechts.bmp	1	3	157269	3	311	157580
RespPr_MoveS1_150	1	74	rechts	maennlich	9	1	rel	links	List1	links.bmp	1	1	159162	1	274	159436
RespPr_MoveS1_150	1	74	rechts	maennlich	10	3	unrel	links	List1	rechts.bmp	1	3	161014	3	486	161500
RespPr_MoveS1_150	1	74	rechts	maennlich	11	3	unrel	links	List1	rechts.bmp	0	3	163080	1	76	163156
RespPr_MoveS1_150	1	74	rechts	maennlich	12	1	neuInnen	neutralInnen	List1	links.bmp	1	1	164733	1	495	165228
RespPr_MoveS1_150	1	74	rechts	maennlich	13	3	unrel	links	List2	rechts.bmp	1	3	185220	3	536	185756
RespPr_MoveS1_150	1	74	rechts	maennlich	14	3	rel	rechts	List2	rechts.bmp	1	3	187326	3	342	187668
RespPr_MoveS1_150	1	74	rechts	maennlich	15	1	neuInnen	neutralInnen	List2	links.bmp	1	1	189232	1	388	189620
RespPr_MoveS1_150	1	74	rechts	maennlich	16	3	neuAussen	neutralAussen	List2	rechts.bmp	1	3	191204	3	600	191804
RespPr_MoveS1_150	1	74	rechts	maennlich	17	3	unrel	links	List2	rechts.bmp	1	3	193390	3	326	193716
RespPr_MoveS1_150	1	74	rechts	maennlich	18	1	neuInnen	neutralInnen	List2	links.bmp	1	1	195296	1	340	195636
RespPr_MoveS1_150	1	74	rechts	maennlich	19	3	rel	rechts	List2	rechts.bmp	1	3	197216	3	300	197516
RespPr_MoveS1_150	1	74	rechts	maennlich	20	3	rel	rechts	List2	rechts.bmp	1	3	199082	3	274	199356
RespPr_MoveS1_150	1	74	rechts	maennlich	21	3	neuInnen	neutralInnen	List2	rechts.bmp	1	3	200934	3	478	201412
RespPr_MoveS1_150	1	74	rechts	maennlich	22	3	unrel	links	List2	rechts.bmp	1	3	203000	3	396	203396
RespPr_MoveS1_150	1	74	rechts	maennlich	23	1	neuInnen	neutralInnen	List2	links.bmp	1	1	204973	1	296	205269
RespPr_MoveS1_150	1	74	rechts	maennlich	24	1	rel	links	List2	links.bmp	1	1	206853	1	279	207132
RespPr_MoveS1_150	1	74	rechts	maennlich	25	3	neuAussen	neutralAussen	List2	rechts.bmp	1	3	208719	3	381	209100
RespPr_MoveS1_150	1	74	rechts	maennlich	26	1	unrel	rechts	List2	links.bmp	0	1	210678	3	318	210996
RespPr_MoveS1_150	1	74	rechts	maennlich	27	3	unrel	links	List2	rechts.bmp	1	3	212584	3	429	213013
RespPr_MoveS1_150	1	74	rechts	maennlich	28	3	rel	rechts	List2	rechts.bmp	1	3	214597	3	391	214988
RespPr_MoveS1_150	1	74	rechts	maennlich	29	1	rel	links	List2	links.bmp	1	1	216569	1	355	216924
RespPr_MoveS1_150	1	74	rechts	maennlich	30	1	neuAussen	neutralAussen	List2	links.bmp	1	1	218489	1	363	218852
RespPr_MoveS1_150	1	74	rechts	maennlich	31	1	rel	links	List2	links.bmp	1	1	220435	1	305	220740
RespPr_MoveS1_150	1	74	rechts	maennlich	32	1	rel	links	List2	links.bmp	1	1	222327	1	302	222629
RespPr_MoveS1_150	1	74	rechts	maennlich	33	1	rel	links	List2	links.bmp	1	1	224207	1	317	224524
RespPr_MoveS1_150	1	74	rechts	maennlich	34	1	rel	links	List2	links.bmp	1	1	226113	1	315	226428
RespPr_MoveS1_150	1	74	rechts	maennlich	35	3	neuInnen	neutralInnen	List2	rechts.bmp	1	3	228006	3	454	228460
RespPr_MoveS1_150	1	74	rechts	maennlich	36	1	unrel	rechts	List2	links.bmp	1	1	230045	1	447	230492
RespPr_MoveS1_150	1	74	rechts	maennlich	37	1	unrel	rechts	List2	links.bmp	1	1	232071	1	437	232508
RespPr_MoveS1_150	1	74	rechts	maennlich	38	3	neuAussen	neutralAussen	List2	rechts.bmp	1	3	234097	3	428	234525
RespPr_MoveS1_150	1	74	rechts	maennlich	39	1	unrel	rechts	List2	links.bmp	1	1	236110	1	414	236524
RespPr_MoveS1_150	1	74	rechts	maennlich	40	1	unrel	rechts	List2	links.bmp	1	1	238109	1	456	238565
RespPr_MoveS1_150	1	74	rechts	maennlich	41	1	neuAussen	neutralAussen	List2	links.bmp	1	1	240148	1	368	240516
RespPr_MoveS1_150	1	74	rechts	maennlich	42	3	unrel	links	List2	rechts.bmp	1	3	242094	3	422	242516
RespPr_MoveS1_150	1	74	rechts	maennlich	43	1	neuAussen	neutralAussen	List2	links.bmp	1	1	244094	1	406	244500
RespPr_MoveS1_150	1	74	rechts	maennlich	44	3	neuInnen	neutralInnen	List2	rechts.bmp	1	3	246080	3	501	246581
RespPr_MoveS1_150	1	74	rechts	maennlich	45	3	rel	rechts	List2	rechts.bmp	1	3	248159	3	413	248572
RespPr_MoveS1_150	1	74	rechts	maennlich	46	3	rel	rechts	List2	rechts.bmp	1	3	250158	3	398	250556
RespPr_MoveS1_150	1	74	rechts	maennlich	47	1	unrel	rechts	List2	links.bmp	0	1	252144	3	325	252469
RespPr_MoveS1_150	1	74	rechts	maennlich	48	3	unrel	links	List2	rechts.bmp	1	3	254050	3	458	254508
RespPr_MoveS1_150	1	74	rechts	maennlich	49	1	rel	links	List3	links.bmp	1	1	287346	1	466	287812
RespPr_MoveS1_150	1	74	rechts	maennlich	50	1	unrel	rechts	List3	links.bmp	1	1	289399	1	381	289780
RespPr_MoveS1_150	1	74	rechts	maennlich	51	3	rel	rechts	List3	rechts.bmp	1	3	291358	3	414	291772
RespPr_MoveS1_150	1	74	rechts	maennlich	52	1	unrel	rechts	List3	links.bmp	1	1	293357	1	447	293804
RespPr_MoveS1_150	1	74	rechts	maennlich	53	1	unrel	rechts	List3	links.bmp	1	1	295383	1	453	295836
RespPr_MoveS1_150	1	74	rechts	maennlich	54	1	rel	links	List3	links.bmp	1	1	297423	1	357	297780
RespPr_MoveS1_150	1	74	rechts	maennlich	55	3	rel	rechts	List3	rechts.bmp	1	3	299369	3	395	299764
RespPr_MoveS1_150	1	74	rechts	maennlich	56	1	rel	links	List3	links.bmp	1	1	301341	1	335	301676
RespPr_MoveS1_150	1	74	rechts	maennlich	57	3	rel	rechts	List3	rechts.bmp	1	3	303261	3	375	303636
RespPr_MoveS1_150	1	74	rechts	maennlich	58	1	rel	links	List3	links.bmp	1	1	305207	1	341	305548
RespPr_MoveS1_150	1	74	rechts	maennlich	59	3	unrel	links	List3	rechts.bmp	1	3	307113	3	516	307629
RespPr_MoveS1_150	1	74	rechts	maennlich	60	3	neuAussen	neutralAussen	List3	rechts.bmp	1	3	309205	3	399	309604
RespPr_MoveS1_150	1	74	rechts	maennlich	61	3	unrel	links	List3	rechts.bmp	1	3	311191	3	437	311628
RespPr_MoveS1_150	1	74	rechts	maennlich	62	3	rel	rechts	List3	rechts.bmp	1	3	313191	3	365	313556
RespPr_MoveS1_150	1	74	rechts	maennlich	63	3	neuInnen	neutralInnen	List3	rechts.bmp	1	3	315137	3	395	315532
RespPr_MoveS1_150	1	74	rechts	maennlich	64	3	neuInnen	neutralInnen	List3	rechts.bmp	1	3	317109	3	368	317477
RespPr_MoveS1_150	1	74	rechts	maennlich	65	3	neuAussen	neutralAussen	List3	rechts.bmp	1	3	319055	3	357	319412
RespPr_MoveS1_150	1	74	rechts	maennlich	66	3	unrel	links	List3	rechts.bmp	1	3	320988	3	409	321397
RespPr_MoveS1_150	1	74	rechts	maennlich	67	3	unrel	links	List3	rechts.bmp	1	3	322974	3	495	323469
RespPr_MoveS1_150	1	74	rechts	maennlich	68	1	neuAussen	neutralAussen	List3	links.bmp	1	1	325053	1	488	325541
RespPr_MoveS1_150	1	74	rechts	maennlich	69	1	neuAussen	neutralAussen	List3	links.bmp	1	1	327119	1	365	327484
RespPr_MoveS1_150	1	74	rechts	maennlich	70	1	rel	links	List3	links.bmp	1	1	329065	1	371	329436
RespPr_MoveS1_150	1	74	rechts	maennlich	71	3	neuAussen	neutralAussen	List3	rechts.bmp	1	3	331025	3	467	331492
RespPr_MoveS1_150	1	74	rechts	maennlich	72	1	neuInnen	neutralInnen	List3	links.bmp	1	1	333077	1	423	333500
RespPr_MoveS1_150	1	74	rechts	maennlich	73	1	neuAussen	neutralAussen	List3	links.bmp	1	1	335077	1	415	335492
RespPr_MoveS1_150	1	74	rechts	maennlich	74	1	rel	links	List3	links.bmp	1	1	337076	1	433	337509
RespPr_MoveS1_150	1	74	rechts	maennlich	75	3	rel	rechts	List3	rechts.bmp	1	3	339089	3	452	339541
RespPr_MoveS1_150	1	74	rechts	maennlich	76	1	unrel	rechts	List3	links.bmp	1	1	341128	1	540	341668
RespPr_MoveS1_150	1	74	rechts	maennlich	77	1	neuInnen	neutralInnen	List3	links.bmp	1	1	343247	1	405	343652
RespPr_MoveS1_150	1	74	rechts	maennlich	78	1	unrel	rechts	List3	links.bmp	1	1	345233	1	427	345660
RespPr_MoveS1_150	1	74	rechts	maennlich	79	1	unrel	rechts	List3	links.bmp	1	1	347233	1	443	347676
RespPr_MoveS1_150	1	74	rechts	maennlich	80	3	rel	rechts	List3	rechts.bmp	0	3	349259	1	441	349700
RespPr_MoveS1_150	1	74	rechts	maennlich	81	3	neuInnen	neutralInnen	List3	rechts.bmp	1	3	351285	3	375	351660
RespPr_MoveS1_150	1	74	rechts	maennlich	82	1	neuInnen	neutralInnen	List3	links.bmp	1	1	353244	1	440	353684
RespPr_MoveS1_150	1	74	rechts	maennlich	83	3	unrel	links	List3	rechts.bmp	1	3	355270	3	454	355724
RespPr_MoveS1_150	1	74	rechts	maennlich	84	3	unrel	links	List3	rechts.bmp	1	3	357309	3	431	357740
RespPr_MoveS1_150	1	74	rechts	maennlich	85	1	rel	links	List4	links.bmp	1	1	380302	1	454	380756
RespPr_MoveS1_150	1	74	rechts	maennlich	86	1	neuAussen	neutralAussen	List4	links.bmp	1	1	382341	1	431	382772
RespPr_MoveS1_150	1	74	rechts	maennlich	87	1	unrel	rechts	List4	links.bmp	1	1	384354	1	418	384772
RespPr_MoveS1_150	1	74	rechts	maennlich	88	3	unrel	links	List4	rechts.bmp	1	3	386353	3	475	386828
RespPr_MoveS1_150	1	74	rechts	maennlich	89	3	rel	rechts	List4	rechts.bmp	1	3	388406	3	415	388821
RespPr_MoveS1_150	1	74	rechts	maennlich	90	1	unrel	rechts	List4	links.bmp	1	1	390405	1	431	390836
RespPr_MoveS1_150	1	74	rechts	maennlich	91	3	rel	rechts	List4	rechts.bmp	1	3	392418	3	338	392756
RespPr_MoveS1_150	1	74	rechts	maennlich	92	1	unrel	rechts	List4	links.bmp	1	1	394337	1	507	394844
RespPr_MoveS1_150	1	74	rechts	maennlich	93	1	rel	links	List4	links.bmp	1	1	396430	1	358	396788
RespPr_MoveS1_150	1	74	rechts	maennlich	94	1	unrel	rechts	List4	links.bmp	1	1	398376	1	460	398836
RespPr_MoveS1_150	1	74	rechts	maennlich	95	3	rel	rechts	List4	rechts.bmp	1	3	400415	3	469	400884
RespPr_MoveS1_150	1	74	rechts	maennlich	96	3	neuAussen	neutralAussen	List4	rechts.bmp	1	3	402468	3	376	402844
RespPr_MoveS1_150	1	74	rechts	maennlich	97	3	rel	rechts	List4	rechts.bmp	1	3	404427	3	353	404780
RespPr_MoveS1_150	1	74	rechts	maennlich	98	3	unrel	links	List4	rechts.bmp	1	3	406360	3	461	406821
RespPr_MoveS1_150	1	74	rechts	maennlich	99	1	rel	links	List4	links.bmp	1	1	408399	1	461	408860
RespPr_MoveS1_150	1	74	rechts	maennlich	100	3	unrel	links	List4	rechts.bmp	1	3	410439	3	469	410908
RespPr_MoveS1_150	1	74	rechts	maennlich	101	3	unrel	links	List4	rechts.bmp	1	3	412491	3	489	412980
RespPr_MoveS1_150	1	74	rechts	maennlich	102	3	neuAussen	neutralAussen	List4	rechts.bmp	1	3	414557	3	391	414948
RespPr_MoveS1_150	1	74	rechts	maennlich	103	1	neuInnen	neutralInnen	List4	links.bmp	1	1	416530	1	338	416868
RespPr_MoveS1_150	1	74	rechts	maennlich	104	1	neuInnen	neutralInnen	List4	links.bmp	1	1	418449	1	348	418797
RespPr_MoveS1_150	1	74	rechts	maennlich	105	3	neuAussen	neutralAussen	List4	rechts.bmp	1	3	420382	3	543	420925
RespPr_MoveS1_150	1	74	rechts	maennlich	106	1	rel	links	List4	links.bmp	1	1	422501	1	439	422940
RespPr_MoveS1_150	1	74	rechts	maennlich	107	3	rel	rechts	List4	rechts.bmp	1	3	424527	3	325	424852
RespPr_MoveS1_150	1	74	rechts	maennlich	108	3	neuInnen	neutralInnen	List4	rechts.bmp	1	3	426433	3	459	426892
RespPr_MoveS1_150	1	74	rechts	maennlich	109	3	neuInnen	neutralInnen	List4	rechts.bmp	1	3	428473	3	483	428956
RespPr_MoveS1_150	1	74	rechts	maennlich	110	1	rel	links	List4	links.bmp	1	1	430539	1	425	430964
RespPr_MoveS1_150	1	74	rechts	maennlich	111	3	unrel	links	List4	rechts.bmp	1	3	432551	3	509	433060
RespPr_MoveS1_150	1	74	rechts	maennlich	112	1	unrel	rechts	List4	links.bmp	1	1	434644	1	473	435117
RespPr_MoveS1_150	1	74	rechts	maennlich	113	1	neuAussen	neutralAussen	List4	links.bmp	1	1	436697	1	835	437532
RespPr_MoveS1_150	1	74	rechts	maennlich	114	1	rel	links	List4	links.bmp	1	1	439096	1	421	439517
RespPr_MoveS1_150	1	74	rechts	maennlich	115	1	neuAussen	neutralAussen	List4	links.bmp	1	1	441082	1	394	441476
RespPr_MoveS1_150	1	74	rechts	maennlich	116	1	neuInnen	neutralInnen	List4	links.bmp	1	1	443054	1	334	443388
RespPr_MoveS1_150	1	74	rechts	maennlich	117	3	neuInnen	neutralInnen	List4	rechts.bmp	1	3	444974	3	879	445853
RespPr_MoveS1_150	1	74	rechts	maennlich	118	1	unrel	rechts	List4	links.bmp	1	1	447440	1	444	447884
RespPr_MoveS1_150	1	74	rechts	maennlich	119	3	unrel	links	List4	rechts.bmp	1	3	449466	3	458	449924
RespPr_MoveS1_150	1	74	rechts	maennlich	120	3	rel	rechts	List4	rechts.bmp	1	3	451505	3	427	451932
RespPr_MoveS1_150	1	74	rechts	maennlich	121	3	neuAussen	neutralAussen	List5	rechts.bmp	1	3	488106	3	515	488621
RespPr_MoveS1_150	1	74	rechts	maennlich	122	1	rel	links	List5	links.bmp	1	1	490199	1	422	490621
RespPr_MoveS1_150	1	74	rechts	maennlich	123	1	unrel	rechts	List5	links.bmp	1	1	492198	1	358	492556
RespPr_MoveS1_150	1	74	rechts	maennlich	124	3	rel	rechts	List5	rechts.bmp	1	3	494144	3	412	494556
RespPr_MoveS1_150	1	74	rechts	maennlich	125	3	unrel	links	List5	rechts.bmp	1	3	496144	3	468	496612
RespPr_MoveS1_150	1	74	rechts	maennlich	126	3	unrel	links	List5	rechts.bmp	1	3	498196	3	441	498637
RespPr_MoveS1_150	1	74	rechts	maennlich	127	3	unrel	links	List5	rechts.bmp	1	3	500222	3	446	500668
RespPr_MoveS1_150	1	74	rechts	maennlich	128	1	neuAussen	neutralAussen	List5	links.bmp	1	1	502248	1	340	502588
RespPr_MoveS1_150	1	74	rechts	maennlich	129	3	rel	rechts	List5	rechts.bmp	1	3	504168	3	380	504548
RespPr_MoveS1_150	1	74	rechts	maennlich	130	3	neuInnen	neutralInnen	List5	rechts.bmp	1	3	506127	3	413	506540
RespPr_MoveS1_150	1	74	rechts	maennlich	131	1	rel	links	List5	links.bmp	1	1	508126	1	350	508476
RespPr_MoveS1_150	1	74	rechts	maennlich	132	3	rel	rechts	List5	rechts.bmp	1	3	510059	3	377	510436
RespPr_MoveS1_150	1	74	rechts	maennlich	133	3	neuInnen	neutralInnen	List5	rechts.bmp	1	3	512018	3	474	512492
RespPr_MoveS1_150	1	74	rechts	maennlich	134	3	unrel	links	List5	rechts.bmp	1	3	514071	3	693	514764
RespPr_MoveS1_150	1	74	rechts	maennlich	135	1	unrel	rechts	List5	links.bmp	1	1	516350	1	574	516924
RespPr_MoveS1_150	1	74	rechts	maennlich	136	3	rel	rechts	List5	rechts.bmp	1	3	518509	3	399	518908
RespPr_MoveS1_150	1	74	rechts	maennlich	137	1	unrel	rechts	List5	links.bmp	1	1	520495	1	469	520964
RespPr_MoveS1_150	1	74	rechts	maennlich	138	3	neuAussen	neutralAussen	List5	rechts.bmp	1	3	522548	3	496	523044
RespPr_MoveS1_150	1	74	rechts	maennlich	139	3	neuAussen	neutralAussen	List5	rechts.bmp	1	3	524627	3	505	525132
RespPr_MoveS1_150	1	74	rechts	maennlich	140	1	neuInnen	neutralInnen	List5	links.bmp	1	1	526707	1	465	527172
RespPr_MoveS1_150	1	74	rechts	maennlich	141	1	unrel	rechts	List5	links.bmp	1	1	528759	1	381	529140
RespPr_MoveS1_150	1	74	rechts	maennlich	142	3	rel	rechts	List5	rechts.bmp	1	3	530719	3	317	531036
RespPr_MoveS1_150	1	74	rechts	maennlich	143	3	unrel	links	List5	rechts.bmp	1	3	532625	3	396	533021
RespPr_MoveS1_150	1	74	rechts	maennlich	144	1	rel	links	List5	links.bmp	1	1	534597	1	496	535093
RespPr_MoveS1_150	1	74	rechts	maennlich	145	1	neuInnen	neutralInnen	List5	links.bmp	1	1	536677	1	391	537068
RespPr_MoveS1_150	1	74	rechts	maennlich	146	1	unrel	rechts	List5	links.bmp	1	1	538649	1	347	538996
RespPr_MoveS1_150	1	74	rechts	maennlich	147	1	neuAussen	neutralAussen	List5	links.bmp	1	1	540582	1	374	540956
RespPr_MoveS1_150	1	74	rechts	maennlich	148	1	unrel	rechts	List5	links.bmp	1	1	542542	1	367	542909
RespPr_MoveS1_150	1	74	rechts	maennlich	149	1	neuInnen	neutralInnen	List5	links.bmp	1	1	544488	1	356	544844
RespPr_MoveS1_150	1	74	rechts	maennlich	150	3	neuInnen	neutralInnen	List5	rechts.bmp	1	3	546434	3	466	546900
RespPr_MoveS1_150	1	74	rechts	maennlich	151	1	rel	links	List5	links.bmp	1	1	548486	1	350	548836
RespPr_MoveS1_150	1	74	rechts	maennlich	152	1	neuAussen	neutralAussen	List5	links.bmp	1	1	550419	1	409	550828
RespPr_MoveS1_150	1	74	rechts	maennlich	153	1	rel	links	List5	links.bmp	1	1	552405	1	319	552724
RespPr_MoveS1_150	1	74	rechts	maennlich	154	3	unrel	links	List5	rechts.bmp	1	3	554311	3	493	554804
RespPr_MoveS1_150	1	74	rechts	maennlich	155	3	rel	rechts	List5	rechts.bmp	1	3	556390	3	415	556805
RespPr_MoveS1_150	1	74	rechts	maennlich	156	1	rel	links	List5	links.bmp	1	1	558390	1	478	558868
RespPr_MoveS1_150	10	80	rechts	maennlich	1	3	unrel	links	List1	rechts.bmp	1	3	90314	3	1434	91748
RespPr_MoveS1_150	10	80	rechts	maennlich	2	1	unrel	rechts	List1	links.bmp	1	1	93313	1	547	93860
RespPr_MoveS1_150	10	80	rechts	maennlich	3	3	neuInnen	neutralInnen	List1	rechts.bmp	1	3	95445	3	688	96133
RespPr_MoveS1_150	10	80	rechts	maennlich	4	3	unrel	links	List1	rechts.bmp	1	3	97711	3	909	98620
RespPr_MoveS1_150	10	80	rechts	maennlich	5	1	neuAussen	neutralAussen	List1	links.bmp	1	1	100204	1	568	100772
RespPr_MoveS1_150	10	80	rechts	maennlich	6	1	unrel	rechts	List1	links.bmp	1	1	102350	1	638	102988
RespPr_MoveS1_150	10	80	rechts	maennlich	7	1	rel	links	List1	links.bmp	1	1	104576	1	668	105244
RespPr_MoveS1_150	10	80	rechts	maennlich	8	3	rel	rechts	List1	rechts.bmp	1	3	106828	3	448	107276
RespPr_MoveS1_150	10	80	rechts	maennlich	9	3	neuAussen	neutralAussen	List1	rechts.bmp	1	3	108854	3	654	109508
RespPr_MoveS1_150	10	80	rechts	maennlich	10	3	rel	rechts	List1	rechts.bmp	1	3	111094	3	462	111556
RespPr_MoveS1_150	10	80	rechts	maennlich	11	1	neuInnen	neutralInnen	List1	links.bmp	1	1	113133	1	440	113573
RespPr_MoveS1_150	10	80	rechts	maennlich	12	1	rel	links	List1	links.bmp	1	1	115159	1	541	115700
RespPr_MoveS1_150	10	80	rechts	maennlich	13	1	rel	links	List2	links.bmp	1	1	136272	1	1220	137492
RespPr_MoveS1_150	10	80	rechts	maennlich	14	1	unrel	rechts	List2	links.bmp	1	1	139071	1	598	139669
RespPr_MoveS1_150	10	80	rechts	maennlich	15	1	unrel	rechts	List2	links.bmp	1	1	141257	1	499	141756
RespPr_MoveS1_150	10	80	rechts	maennlich	16	3	neuAussen	neutralAussen	List2	rechts.bmp	1	3	143336	3	348	143684
RespPr_MoveS1_150	10	80	rechts	maennlich	17	3	rel	rechts	List2	rechts.bmp	1	3	145269	3	407	145676
RespPr_MoveS1_150	10	80	rechts	maennlich	18	3	rel	rechts	List2	rechts.bmp	1	3	147255	3	381	147636
RespPr_MoveS1_150	10	80	rechts	maennlich	19	3	rel	rechts	List2	rechts.bmp	1	3	149214	3	478	149692
RespPr_MoveS1_150	10	80	rechts	maennlich	20	1	unrel	rechts	List2	links.bmp	1	1	151280	1	413	151693
RespPr_MoveS1_150	10	80	rechts	maennlich	21	3	neuAussen	neutralAussen	List2	rechts.bmp	1	3	153280	3	460	153740
RespPr_MoveS1_150	10	80	rechts	maennlich	22	1	rel	links	List2	links.bmp	1	1	155319	1	461	155780
RespPr_MoveS1_150	10	80	rechts	maennlich	23	3	unrel	links	List2	rechts.bmp	1	3	157358	3	535	157893
RespPr_MoveS1_150	10	80	rechts	maennlich	24	1	neuAussen	neutralAussen	List2	links.bmp	1	1	159478	1	438	159916
RespPr_MoveS1_150	10	80	rechts	maennlich	25	1	unrel	rechts	List2	links.bmp	1	1	161504	1	508	162012
RespPr_MoveS1_150	10	80	rechts	maennlich	26	1	unrel	rechts	List2	links.bmp	1	1	163596	1	512	164108
RespPr_MoveS1_150	10	80	rechts	maennlich	27	1	neuInnen	neutralInnen	List2	links.bmp	1	1	165689	1	467	166156
RespPr_MoveS1_150	10	80	rechts	maennlich	28	3	neuAussen	neutralAussen	List2	rechts.bmp	1	3	167741	3	543	168284
RespPr_MoveS1_150	10	80	rechts	maennlich	29	1	neuAussen	neutralAussen	List2	links.bmp	1	1	169861	1	407	170268
RespPr_MoveS1_150	10	80	rechts	maennlich	30	3	rel	rechts	List2	rechts.bmp	1	3	171847	3	517	172364
RespPr_MoveS1_150	10	80	rechts	maennlich	31	3	rel	rechts	List2	rechts.bmp	1	3	173953	3	571	174524
RespPr_MoveS1_150	10	80	rechts	maennlich	32	3	unrel	links	List2	rechts.bmp	1	3	176099	3	554	176653
RespPr_MoveS1_150	10	80	rechts	maennlich	33	3	unrel	links	List2	rechts.bmp	1	3	178231	3	470	178701
RespPr_MoveS1_150	10	80	rechts	maennlich	34	1	rel	links	List2	links.bmp	1	1	180271	1	526	180797
RespPr_MoveS1_150	10	80	rechts	maennlich	35	3	neuInnen	neutralInnen	List2	rechts.bmp	1	3	182377	3	643	183020
RespPr_MoveS1_150	10	80	rechts	maennlich	36	3	unrel	links	List2	rechts.bmp	1	3	184603	3	674	185277
RespPr_MoveS1_150	10	80	rechts	maennlich	37	3	unrel	links	List2	rechts.bmp	1	3	186855	3	486	187341
RespPr_MoveS1_150	10	80	rechts	maennlich	38	3	neuInnen	neutralInnen	List2	rechts.bmp	1	3	188921	3	459	189380
RespPr_MoveS1_150	10	80	rechts	maennlich	39	1	rel	links	List2	links.bmp	1	1	190960	1	532	191492
RespPr_MoveS1_150	10	80	rechts	maennlich	40	1	neuInnen	neutralInnen	List2	links.bmp	1	1	193080	1	412	193492
RespPr_MoveS1_150	10	80	rechts	maennlich	41	1	rel	links	List2	links.bmp	1	1	195066	1	378	195444
RespPr_MoveS1_150	10	80	rechts	maennlich	42	1	rel	links	List2	links.bmp	1	1	197025	1	443	197468
RespPr_MoveS1_150	10	80	rechts	maennlich	43	3	neuInnen	neutralInnen	List2	rechts.bmp	1	3	199051	3	409	199460
RespPr_MoveS1_150	10	80	rechts	maennlich	44	1	neuAussen	neutralAussen	List2	links.bmp	1	1	201037	1	359	201396
RespPr_MoveS1_150	10	80	rechts	maennlich	45	3	unrel	links	List2	rechts.bmp	1	3	202983	3	541	203524
RespPr_MoveS1_150	10	80	rechts	maennlich	46	1	unrel	rechts	List2	links.bmp	1	1	205102	1	359	205461
RespPr_MoveS1_150	10	80	rechts	maennlich	47	3	rel	rechts	List2	rechts.bmp	1	3	207048	3	509	207557
RespPr_MoveS1_150	10	80	rechts	maennlich	48	1	neuInnen	neutralInnen	List2	links.bmp	1	1	209141	1	480	209621
RespPr_MoveS1_150	10	80	rechts	maennlich	49	3	neuInnen	neutralInnen	List3	rechts.bmp	1	3	220337	3	923	221260
RespPr_MoveS1_150	10	80	rechts	maennlich	50	1	unrel	rechts	List3	links.bmp	1	1	222843	1	633	223476
RespPr_MoveS1_150	10	80	rechts	maennlich	51	3	rel	rechts	List3	rechts.bmp	1	3	225056	3	636	225692
RespPr_MoveS1_150	10	80	rechts	maennlich	52	1	neuInnen	neutralInnen	List3	links.bmp	1	1	227268	1	440	227708
RespPr_MoveS1_150	10	80	rechts	maennlich	53	3	unrel	links	List3	rechts.bmp	1	3	229294	3	454	229748
RespPr_MoveS1_150	10	80	rechts	maennlich	54	1	unrel	rechts	List3	links.bmp	1	1	231334	1	414	231748
RespPr_MoveS1_150	10	80	rechts	maennlich	55	1	neuAussen	neutralAussen	List3	links.bmp	1	1	233333	1	607	233940
RespPr_MoveS1_150	10	80	rechts	maennlich	56	3	rel	rechts	List3	rechts.bmp	1	3	235506	3	506	236012
RespPr_MoveS1_150	10	80	rechts	maennlich	57	3	unrel	links	List3	rechts.bmp	1	3	237598	3	486	238084
RespPr_MoveS1_150	10	80	rechts	maennlich	58	1	neuAussen	neutralAussen	List3	links.bmp	1	1	239664	1	469	240133
RespPr_MoveS1_150	10	80	rechts	maennlich	59	3	rel	rechts	List3	rechts.bmp	1	3	241704	3	444	242148
RespPr_MoveS1_150	10	80	rechts	maennlich	60	3	neuInnen	neutralInnen	List3	rechts.bmp	1	3	243730	3	570	244300
RespPr_MoveS1_150	10	80	rechts	maennlich	61	1	unrel	rechts	List3	links.bmp	1	1	245889	1	459	246348
RespPr_MoveS1_150	10	80	rechts	maennlich	62	3	unrel	links	List3	rechts.bmp	1	3	247928	3	404	248332
RespPr_MoveS1_150	10	80	rechts	maennlich	63	1	unrel	rechts	List3	links.bmp	1	1	249914	1	514	250428
RespPr_MoveS1_150	10	80	rechts	maennlich	64	3	rel	rechts	List3	rechts.bmp	1	3	252007	3	430	252437
RespPr_MoveS1_150	10	80	rechts	maennlich	65	3	unrel	links	List3	rechts.bmp	1	3	254020	3	408	254428
RespPr_MoveS1_150	10	80	rechts	maennlich	66	1	rel	links	List3	links.bmp	1	1	256006	1	574	256580
RespPr_MoveS1_150	10	80	rechts	maennlich	67	1	neuAussen	neutralAussen	List3	links.bmp	1	1	258165	1	391	258556
RespPr_MoveS1_150	10	80	rechts	maennlich	68	3	unrel	links	List3	rechts.bmp	1	3	260138	3	474	260612
RespPr_MoveS1_150	10	80	rechts	maennlich	69	1	unrel	rechts	List3	links.bmp	1	1	262190	1	502	262692
RespPr_MoveS1_150	10	80	rechts	maennlich	70	1	unrel	rechts	List3	links.bmp	1	1	264270	1	766	265036
RespPr_MoveS1_150	10	80	rechts	maennlich	71	3	unrel	links	List3	rechts.bmp	1	3	266615	3	510	267125
RespPr_MoveS1_150	10	80	rechts	maennlich	72	1	neuInnen	neutralInnen	List3	links.bmp	1	1	268695	1	517	269212
RespPr_MoveS1_150	10	80	rechts	maennlich	73	1	rel	links	List3	links.bmp	1	1	270801	1	539	271340
RespPr_MoveS1_150	10	80	rechts	maennlich	74	3	neuInnen	neutralInnen	List3	rechts.bmp	1	3	272907	3	521	273428
RespPr_MoveS1_150	10	80	rechts	maennlich	75	3	neuAussen	neutralAussen	List3	rechts.bmp	1	3	275013	3	663	275676
RespPr_MoveS1_150	10	80	rechts	maennlich	76	1	rel	links	List3	links.bmp	1	1	277252	1	544	277796
RespPr_MoveS1_150	10	80	rechts	maennlich	77	1	rel	links	List3	links.bmp	1	1	279385	1	643	280028
RespPr_MoveS1_150	10	80	rechts	maennlich	78	3	rel	rechts	List3	rechts.bmp	1	3	281611	3	497	282108
RespPr_MoveS1_150	10	80	rechts	maennlich	79	3	rel	rechts	List3	rechts.bmp	1	3	283690	3	578	284268
RespPr_MoveS1_150	10	80	rechts	maennlich	80	3	neuAussen	neutralAussen	List3	rechts.bmp	1	3	285836	3	520	286356
RespPr_MoveS1_150	10	80	rechts	maennlich	81	1	rel	links	List3	links.bmp	1	1	287942	1	526	288468
RespPr_MoveS1_150	10	80	rechts	maennlich	82	3	neuAussen	neutralAussen	List3	rechts.bmp	1	3	290048	3	620	290668
RespPr_MoveS1_150	10	80	rechts	maennlich	83	1	rel	links	List3	links.bmp	1	1	292247	1	437	292684
RespPr_MoveS1_150	10	80	rechts	maennlich	84	1	neuInnen	neutralInnen	List3	links.bmp	1	1	294260	1	552	294812
RespPr_MoveS1_150	10	80	rechts	maennlich	85	3	rel	rechts	List4	rechts.bmp	1	3	309708	3	1632	311340
RespPr_MoveS1_150	10	80	rechts	maennlich	86	3	unrel	links	List4	rechts.bmp	1	3	312920	3	645	313565
RespPr_MoveS1_150	10	80	rechts	maennlich	87	1	neuAussen	neutralAussen	List4	links.bmp	1	1	315133	1	520	315653
RespPr_MoveS1_150	10	80	rechts	maennlich	88	1	neuInnen	neutralInnen	List4	links.bmp	1	1	317239	1	437	317676
RespPr_MoveS1_150	10	80	rechts	maennlich	89	1	unrel	rechts	List4	links.bmp	1	1	319265	1	411	319676
RespPr_MoveS1_150	10	80	rechts	maennlich	90	1	neuInnen	neutralInnen	List4	links.bmp	1	1	321251	1	401	321652
RespPr_MoveS1_150	10	80	rechts	maennlich	91	3	rel	rechts	List4	rechts.bmp	1	3	323237	3	399	323636
RespPr_MoveS1_150	10	80	rechts	maennlich	92	3	rel	rechts	List4	rechts.bmp	1	3	325223	3	493	325716
RespPr_MoveS1_150	10	80	rechts	maennlich	93	1	unrel	rechts	List4	links.bmp	1	1	327289	1	467	327756
RespPr_MoveS1_150	10	80	rechts	maennlich	94	3	neuAussen	neutralAussen	List4	rechts.bmp	1	3	329341	3	408	329749
RespPr_MoveS1_150	10	80	rechts	maennlich	95	3	rel	rechts	List4	rechts.bmp	1	3	331327	3	517	331844
RespPr_MoveS1_150	10	80	rechts	maennlich	96	3	neuInnen	neutralInnen	List4	rechts.bmp	1	3	333407	3	446	333853
RespPr_MoveS1_150	10	80	rechts	maennlich	97	3	unrel	links	List4	rechts.bmp	1	3	335433	3	420	335853
RespPr_MoveS1_150	10	80	rechts	maennlich	98	1	neuAussen	neutralAussen	List4	links.bmp	1	1	337419	1	457	337876
RespPr_MoveS1_150	10	80	rechts	maennlich	99	1	neuInnen	neutralInnen	List4	links.bmp	1	1	339458	1	594	340052
RespPr_MoveS1_150	10	80	rechts	maennlich	100	3	rel	rechts	List4	rechts.bmp	1	3	341631	3	509	342140
RespPr_MoveS1_150	10	80	rechts	maennlich	101	3	unrel	links	List4	rechts.bmp	1	3	343723	3	506	344229
RespPr_MoveS1_150	10	80	rechts	maennlich	102	1	unrel	rechts	List4	links.bmp	1	1	345816	1	581	346397
RespPr_MoveS1_150	10	80	rechts	maennlich	103	1	unrel	rechts	List4	links.bmp	1	1	347975	1	589	348564
RespPr_MoveS1_150	10	80	rechts	maennlich	104	1	neuAussen	neutralAussen	List4	links.bmp	1	1	350148	1	528	350676
RespPr_MoveS1_150	10	80	rechts	maennlich	105	1	unrel	rechts	List4	links.bmp	1	1	352254	1	438	352692
RespPr_MoveS1_150	10	80	rechts	maennlich	106	3	unrel	links	List4	rechts.bmp	1	3	354280	3	357	354637
RespPr_MoveS1_150	10	80	rechts	maennlich	107	1	rel	links	List4	links.bmp	1	1	356226	1	530	356756
RespPr_MoveS1_150	10	80	rechts	maennlich	108	3	neuInnen	neutralInnen	List4	rechts.bmp	1	3	358345	3	499	358844
RespPr_MoveS1_150	10	80	rechts	maennlich	109	1	rel	links	List4	links.bmp	1	1	360424	1	476	360900
RespPr_MoveS1_150	10	80	rechts	maennlich	110	3	neuAussen	neutralAussen	List4	rechts.bmp	1	3	362464	3	405	362869
RespPr_MoveS1_150	10	80	rechts	maennlich	111	1	rel	links	List4	links.bmp	1	1	364450	1	578	365028
RespPr_MoveS1_150	10	80	rechts	maennlich	112	1	rel	links	List4	links.bmp	1	1	366596	1	576	367172
RespPr_MoveS1_150	10	80	rechts	maennlich	113	1	unrel	rechts	List4	links.bmp	1	1	368742	1	438	369180
RespPr_MoveS1_150	10	80	rechts	maennlich	114	3	rel	rechts	List4	rechts.bmp	1	3	370768	3	445	371213
RespPr_MoveS1_150	10	80	rechts	maennlich	115	3	neuAussen	neutralAussen	List4	rechts.bmp	1	3	372794	3	610	373404
RespPr_MoveS1_150	10	80	rechts	maennlich	116	1	rel	links	List4	links.bmp	1	1	374993	1	475	375468
RespPr_MoveS1_150	10	80	rechts	maennlich	117	3	unrel	links	List4	rechts.bmp	1	3	377046	3	598	377644
RespPr_MoveS1_150	10	80	rechts	maennlich	118	3	unrel	links	List4	rechts.bmp	1	3	379232	3	452	379684
RespPr_MoveS1_150	10	80	rechts	maennlich	119	3	neuInnen	neutralInnen	List4	rechts.bmp	1	3	381271	3	437	381708
RespPr_MoveS1_150	10	80	rechts	maennlich	120	1	rel	links	List4	links.bmp	1	1	383297	1	467	383764
RespPr_MoveS1_150	10	80	rechts	maennlich	121	3	neuInnen	neutralInnen	List5	rechts.bmp	1	3	401797	3	831	402628
RespPr_MoveS1_150	10	80	rechts	maennlich	122	3	rel	rechts	List5	rechts.bmp	1	3	404210	3	506	404716
RespPr_MoveS1_150	10	80	rechts	maennlich	123	1	neuAussen	neutralAussen	List5	links.bmp	1	1	406303	1	502	406805
RespPr_MoveS1_150	10	80	rechts	maennlich	124	3	neuInnen	neutralInnen	List5	rechts.bmp	1	3	408382	3	470	408852
RespPr_MoveS1_150	10	80	rechts	maennlich	125	3	unrel	links	List5	rechts.bmp	1	3	410435	3	473	410908
RespPr_MoveS1_150	10	80	rechts	maennlich	126	1	neuAussen	neutralAussen	List5	links.bmp	1	1	412487	1	445	412932
RespPr_MoveS1_150	10	80	rechts	maennlich	127	3	unrel	links	List5	rechts.bmp	1	3	414513	3	435	414948
RespPr_MoveS1_150	10	80	rechts	maennlich	128	1	unrel	rechts	List5	links.bmp	1	1	416526	1	519	417045
RespPr_MoveS1_150	10	80	rechts	maennlich	129	1	unrel	rechts	List5	links.bmp	1	1	418632	1	396	419028
RespPr_MoveS1_150	10	80	rechts	maennlich	130	3	rel	rechts	List5	rechts.bmp	1	3	420605	3	503	421108
RespPr_MoveS1_150	10	80	rechts	maennlich	131	1	rel	links	List5	links.bmp	1	1	422684	1	448	423132
RespPr_MoveS1_150	10	80	rechts	maennlich	132	3	unrel	links	List5	rechts.bmp	1	3	424710	3	398	425108
RespPr_MoveS1_150	10	80	rechts	maennlich	133	1	rel	links	List5	links.bmp	1	1	426696	1	476	427172
RespPr_MoveS1_150	10	80	rechts	maennlich	134	3	rel	rechts	List5	rechts.bmp	1	3	428749	3	455	429204
RespPr_MoveS1_150	10	80	rechts	maennlich	135	3	unrel	links	List5	rechts.bmp	1	3	430788	3	408	431196
RespPr_MoveS1_150	10	80	rechts	maennlich	136	1	unrel	rechts	List5	links.bmp	1	1	432774	1	502	433276
RespPr_MoveS1_150	10	80	rechts	maennlich	137	3	unrel	links	List5	rechts.bmp	1	3	434853	3	511	435364
RespPr_MoveS1_150	10	80	rechts	maennlich	138	1	neuInnen	neutralInnen	List5	links.bmp	1	1	436946	1	499	437445
RespPr_MoveS1_150	10	80	rechts	maennlich	139	3	rel	rechts	List5	rechts.bmp	1	3	439012	3	584	439596
RespPr_MoveS1_150	10	80	rechts	maennlich	140	3	neuAussen	neutralAussen	List5	rechts.bmp	1	3	441184	3	548	441732
RespPr_MoveS1_150	10	80	rechts	maennlich	141	3	rel	rechts	List5	rechts.bmp	1	3	443304	3	492	443796
RespPr_MoveS1_150	10	80	rechts	maennlich	142	1	unrel	rechts	List5	links.bmp	1	1	445370	1	442	445812
RespPr_MoveS1_150	10	80	rechts	maennlich	143	1	neuInnen	neutralInnen	List5	links.bmp	1	1	447396	1	448	447844
RespPr_MoveS1_150	10	80	rechts	maennlich	144	3	unrel	links	List5	rechts.bmp	1	3	449422	3	462	449884
RespPr_MoveS1_150	10	80	rechts	maennlich	145	1	rel	links	List5	links.bmp	1	1	451448	1	501	451949
RespPr_MoveS1_150	10	80	rechts	maennlich	146	3	rel	rechts	List5	rechts.bmp	1	3	453527	3	445	453972
RespPr_MoveS1_150	10	80	rechts	maennlich	147	3	neuInnen	neutralInnen	List5	rechts.bmp	1	3	455553	3	611	456164
RespPr_MoveS1_150	10	80	rechts	maennlich	148	1	neuAussen	neutralAussen	List5	links.bmp	1	1	457752	1	444	458196
RespPr_MoveS1_150	10	80	rechts	maennlich	149	1	unrel	rechts	List5	links.bmp	1	1	459778	1	442	460220
RespPr_MoveS1_150	10	80	rechts	maennlich	150	1	rel	links	List5	links.bmp	1	1	461804	1	456	462260
RespPr_MoveS1_150	10	80	rechts	maennlich	151	3	neuAussen	neutralAussen	List5	rechts.bmp	1	3	463844	3	528	464372
RespPr_MoveS1_150	10	80	rechts	maennlich	152	1	neuInnen	neutralInnen	List5	links.bmp	1	1	465950	1	470	466420
RespPr_MoveS1_150	10	80	rechts	maennlich	153	1	rel	links	List5	links.bmp	1	1	468002	1	554	468556
RespPr_MoveS1_150	10	80	rechts	maennlich	154	3	neuAussen	neutralAussen	List5	rechts.bmp	1	3	470135	3	669	470804
RespPr_MoveS1_150	10	80	rechts	maennlich	155	1	unrel	rechts	List5	links.bmp	1	1	472387	1	577	472964
RespPr_MoveS1_150	10	80	rechts	maennlich	156	1	rel	links	List5	links.bmp	1	1	474547	1	537	475084
RespPr_MoveS1_150	11	64	rechts	maennlich	1	1	unrel	rechts	List1	links.bmp	1	1	132397	1	523	132920
RespPr_MoveS1_150	11	64	rechts	maennlich	2	3	neuAussen	neutralAussen	List1	rechts.bmp	1	3	134503	3	488	134991
RespPr_MoveS1_150	11	64	rechts	maennlich	3	3	neuInnen	neutralInnen	List1	rechts.bmp	1	3	136569	3	646	137215
RespPr_MoveS1_150	11	64	rechts	maennlich	4	3	rel	rechts	List1	rechts.bmp	1	3	138782	3	697	139479
RespPr_MoveS1_150	11	64	rechts	maennlich	5	3	unrel	links	List1	rechts.bmp	1	3	141048	3	672	141720
RespPr_MoveS1_150	11	64	rechts	maennlich	6	1	neuInnen	neutralInnen	List1	links.bmp	1	1	143300	1	523	143823
RespPr_MoveS1_150	11	64	rechts	maennlich	7	1	neuAussen	neutralAussen	List1	links.bmp	1	1	145406	1	625	146031
RespPr_MoveS1_150	11	64	rechts	maennlich	8	3	unrel	links	List1	rechts.bmp	1	3	147619	3	532	148151
RespPr_MoveS1_150	11	64	rechts	maennlich	9	1	unrel	rechts	List1	links.bmp	1	1	149738	1	389	150127
RespPr_MoveS1_150	11	64	rechts	maennlich	10	1	rel	links	List1	links.bmp	1	1	151711	1	560	152271
RespPr_MoveS1_150	11	64	rechts	maennlich	11	3	rel	rechts	List1	rechts.bmp	1	3	153857	3	487	154344
RespPr_MoveS1_150	11	64	rechts	maennlich	12	1	rel	links	List1	links.bmp	1	1	155923	1	373	156296
RespPr_MoveS1_150	11	64	rechts	maennlich	13	3	unrel	links	List2	rechts.bmp	1	3	180475	3	493	180968
RespPr_MoveS1_150	11	64	rechts	maennlich	14	3	neuInnen	neutralInnen	List2	rechts.bmp	1	3	182541	3	530	183071
RespPr_MoveS1_150	11	64	rechts	maennlich	15	3	neuAussen	neutralAussen	List2	rechts.bmp	1	3	184660	3	516	185176
RespPr_MoveS1_150	11	64	rechts	maennlich	16	1	unrel	rechts	List2	links.bmp	1	1	186753	1	399	187152
RespPr_MoveS1_150	11	64	rechts	maennlich	17	3	unrel	links	List2	rechts.bmp	1	3	188739	3	429	189168
RespPr_MoveS1_150	11	64	rechts	maennlich	18	1	rel	links	List2	links.bmp	1	1	190751	1	384	191135
RespPr_MoveS1_150	11	64	rechts	maennlich	19	1	unrel	rechts	List2	links.bmp	1	1	192724	1	523	193247
RespPr_MoveS1_150	11	64	rechts	maennlich	20	3	rel	rechts	List2	rechts.bmp	1	3	194830	3	586	195416
RespPr_MoveS1_150	11	64	rechts	maennlich	21	1	rel	links	List2	links.bmp	1	1	197003	1	397	197400
RespPr_MoveS1_150	11	64	rechts	maennlich	22	1	rel	links	List2	links.bmp	1	1	198989	1	530	199519
RespPr_MoveS1_150	11	64	rechts	maennlich	23	3	unrel	links	List2	rechts.bmp	1	3	201108	3	659	201767
RespPr_MoveS1_150	11	64	rechts	maennlich	24	1	neuInnen	neutralInnen	List2	links.bmp	1	1	203334	1	361	203695
RespPr_MoveS1_150	11	64	rechts	maennlich	25	3	neuAussen	neutralAussen	List2	rechts.bmp	1	3	205280	3	392	205672
RespPr_MoveS1_150	11	64	rechts	maennlich	26	1	neuAussen	neutralAussen	List2	links.bmp	1	1	207252	1	372	207624
RespPr_MoveS1_150	11	64	rechts	maennlich	27	1	unrel	rechts	List2	links.bmp	1	1	209212	1	492	209704
RespPr_MoveS1_150	11	64	rechts	maennlich	28	1	neuInnen	neutralInnen	List2	links.bmp	1	1	211291	1	445	211736
RespPr_MoveS1_150	11	64	rechts	maennlich	29	1	unrel	rechts	List2	links.bmp	1	1	213317	1	474	213791
RespPr_MoveS1_150	11	64	rechts	maennlich	30	3	rel	rechts	List2	rechts.bmp	1	3	215370	3	597	215967
RespPr_MoveS1_150	11	64	rechts	maennlich	31	3	rel	rechts	List2	rechts.bmp	1	3	217556	3	459	218015
RespPr_MoveS1_150	11	64	rechts	maennlich	32	3	unrel	links	List2	rechts.bmp	1	3	219582	3	522	220104
RespPr_MoveS1_150	11	64	rechts	maennlich	33	3	unrel	links	List2	rechts.bmp	1	3	221688	3	536	222224
RespPr_MoveS1_150	11	64	rechts	maennlich	34	3	rel	rechts	List2	rechts.bmp	1	3	223794	3	550	224344
RespPr_MoveS1_150	11	64	rechts	maennlich	35	3	neuInnen	neutralInnen	List2	rechts.bmp	1	3	225926	3	513	226439
RespPr_MoveS1_150	11	64	rechts	maennlich	36	1	neuInnen	neutralInnen	List2	links.bmp	1	1	228019	1	564	228583
RespPr_MoveS1_150	11	64	rechts	maennlich	37	3	unrel	links	List2	rechts.bmp	1	3	230165	3	602	230767
RespPr_MoveS1_150	11	64	rechts	maennlich	38	1	unrel	rechts	List2	links.bmp	1	1	232351	1	425	232776
RespPr_MoveS1_150	11	64	rechts	maennlich	39	1	rel	links	List2	links.bmp	1	1	234364	1	387	234751
RespPr_MoveS1_150	11	64	rechts	maennlich	40	3	neuInnen	neutralInnen	List2	rechts.bmp	1	3	236336	3	495	236831
RespPr_MoveS1_150	11	64	rechts	maennlich	41	1	neuAussen	neutralAussen	List2	links.bmp	1	1	238416	1	360	238776
RespPr_MoveS1_150	11	64	rechts	maennlich	42	1	rel	links	List2	links.bmp	1	1	240362	1	382	240744
RespPr_MoveS1_150	11	64	rechts	maennlich	43	1	unrel	rechts	List2	links.bmp	1	1	242321	1	495	242816
RespPr_MoveS1_150	11	64	rechts	maennlich	44	3	neuAussen	neutralAussen	List2	rechts.bmp	1	3	244400	3	536	244936
RespPr_MoveS1_150	11	64	rechts	maennlich	45	3	rel	rechts	List2	rechts.bmp	1	3	246519	3	456	246975
RespPr_MoveS1_150	11	64	rechts	maennlich	46	1	neuAussen	neutralAussen	List2	links.bmp	1	1	248559	1	456	249015
RespPr_MoveS1_150	11	64	rechts	maennlich	47	3	rel	rechts	List2	rechts.bmp	1	3	250598	3	401	250999
RespPr_MoveS1_150	11	64	rechts	maennlich	48	1	rel	links	List2	links.bmp	1	1	252584	1	424	253008
RespPr_MoveS1_150	11	64	rechts	maennlich	49	3	unrel	links	List3	rechts.bmp	1	3	258436	3	524	258960
RespPr_MoveS1_150	11	64	rechts	maennlich	50	3	rel	rechts	List3	rechts.bmp	1	3	260542	3	538	261080
RespPr_MoveS1_150	11	64	rechts	maennlich	51	3	unrel	links	List3	rechts.bmp	1	3	262661	3	658	263319
RespPr_MoveS1_150	11	64	rechts	maennlich	52	3	neuAussen	neutralAussen	List3	rechts.bmp	1	3	264887	3	568	265455
RespPr_MoveS1_150	11	64	rechts	maennlich	53	1	neuInnen	neutralInnen	List3	links.bmp	1	1	267033	1	471	267504
RespPr_MoveS1_150	11	64	rechts	maennlich	54	3	neuInnen	neutralInnen	List3	rechts.bmp	1	3	269085	3	467	269552
RespPr_MoveS1_150	11	64	rechts	maennlich	55	3	neuInnen	neutralInnen	List3	rechts.bmp	1	3	271125	3	683	271808
RespPr_MoveS1_150	11	64	rechts	maennlich	56	1	neuInnen	neutralInnen	List3	links.bmp	1	1	273391	1	473	273864
RespPr_MoveS1_150	11	64	rechts	maennlich	57	1	rel	links	List3	links.bmp	1	1	275443	1	484	275927
RespPr_MoveS1_150	11	64	rechts	maennlich	58	1	neuAussen	neutralAussen	List3	links.bmp	1	1	277509	1	466	277975
RespPr_MoveS1_150	11	64	rechts	maennlich	59	3	neuAussen	neutralAussen	List3	rechts.bmp	1	3	279562	3	637	280199
RespPr_MoveS1_150	11	64	rechts	maennlich	60	3	rel	rechts	List3	rechts.bmp	1	3	281788	3	459	282247
RespPr_MoveS1_150	11	64	rechts	maennlich	61	3	rel	rechts	List3	rechts.bmp	1	3	283827	3	429	284256
RespPr_MoveS1_150	11	64	rechts	maennlich	62	3	unrel	links	List3	rechts.bmp	1	3	285840	3	423	286263
RespPr_MoveS1_150	11	64	rechts	maennlich	63	1	unrel	rechts	List3	links.bmp	1	1	287839	1	520	288359
RespPr_MoveS1_150	11	64	rechts	maennlich	64	1	rel	links	List3	links.bmp	1	1	289945	1	447	290392
RespPr_MoveS1_150	11	64	rechts	maennlich	65	3	unrel	links	List3	rechts.bmp	1	3	291971	3	428	292399
RespPr_MoveS1_150	11	64	rechts	maennlich	66	3	neuAussen	neutralAussen	List3	rechts.bmp	1	3	293984	3	519	294503
RespPr_MoveS1_150	11	64	rechts	maennlich	67	1	unrel	rechts	List3	links.bmp	1	1	296090	1	494	296584
RespPr_MoveS1_150	11	64	rechts	maennlich	68	3	unrel	links	List3	rechts.bmp	1	3	298156	3	484	298640
RespPr_MoveS1_150	11	64	rechts	maennlich	69	3	unrel	links	List3	rechts.bmp	1	3	300222	3	457	300679
RespPr_MoveS1_150	11	64	rechts	maennlich	70	3	rel	rechts	List3	rechts.bmp	1	3	302248	3	583	302831
RespPr_MoveS1_150	11	64	rechts	maennlich	71	1	rel	links	List3	links.bmp	1	1	304420	1	396	304816
RespPr_MoveS1_150	11	64	rechts	maennlich	72	1	rel	links	List3	links.bmp	1	1	306380	1	436	306816
RespPr_MoveS1_150	11	64	rechts	maennlich	73	1	neuAussen	neutralAussen	List3	links.bmp	1	1	308392	1	472	308864
RespPr_MoveS1_150	11	64	rechts	maennlich	74	1	rel	links	List3	links.bmp	1	1	310432	1	432	310864
RespPr_MoveS1_150	11	64	rechts	maennlich	75	3	neuInnen	neutralInnen	List3	rechts.bmp	1	3	312444	3	484	312928
RespPr_MoveS1_150	11	64	rechts	maennlich	76	1	neuInnen	neutralInnen	List3	links.bmp	1	1	314510	1	385	314895
RespPr_MoveS1_150	11	64	rechts	maennlich	77	3	rel	rechts	List3	rechts.bmp	1	3	316470	3	394	316864
RespPr_MoveS1_150	11	64	rechts	maennlich	78	1	unrel	rechts	List3	links.bmp	1	1	318442	1	445	318887
RespPr_MoveS1_150	11	64	rechts	maennlich	79	1	unrel	rechts	List3	links.bmp	1	1	320468	1	444	320912
RespPr_MoveS1_150	11	64	rechts	maennlich	80	1	unrel	rechts	List3	links.bmp	1	1	322494	1	410	322904
RespPr_MoveS1_150	11	64	rechts	maennlich	81	1	unrel	rechts	List3	links.bmp	1	1	324480	1	415	324895
RespPr_MoveS1_150	11	64	rechts	maennlich	82	3	rel	rechts	List3	rechts.bmp	1	3	326480	3	535	327015
RespPr_MoveS1_150	11	64	rechts	maennlich	83	1	rel	links	List3	links.bmp	1	1	328586	1	446	329032
RespPr_MoveS1_150	11	64	rechts	maennlich	84	1	neuAussen	neutralAussen	List3	links.bmp	1	1	330612	1	411	331023
RespPr_MoveS1_150	11	64	rechts	maennlich	85	3	rel	rechts	List4	rechts.bmp	1	3	342968	3	504	343472
RespPr_MoveS1_150	11	64	rechts	maennlich	86	1	rel	links	List4	links.bmp	1	1	345060	1	396	345456
RespPr_MoveS1_150	11	64	rechts	maennlich	87	1	neuAussen	neutralAussen	List4	links.bmp	1	1	347033	1	391	347424
RespPr_MoveS1_150	11	64	rechts	maennlich	88	1	rel	links	List4	links.bmp	1	1	349006	1	426	349432
RespPr_MoveS1_150	11	64	rechts	maennlich	89	3	neuInnen	neutralInnen	List4	rechts.bmp	1	3	351018	3	413	351431
RespPr_MoveS1_150	11	64	rechts	maennlich	90	1	neuInnen	neutralInnen	List4	links.bmp	1	1	353018	1	373	353391
RespPr_MoveS1_150	11	64	rechts	maennlich	91	1	unrel	rechts	List4	links.bmp	1	1	354977	1	375	355352
RespPr_MoveS1_150	11	64	rechts	maennlich	92	1	neuInnen	neutralInnen	List4	links.bmp	1	1	356936	1	400	357336
RespPr_MoveS1_150	11	64	rechts	maennlich	93	1	neuAussen	neutralAussen	List4	links.bmp	1	1	358922	1	454	359376
RespPr_MoveS1_150	11	64	rechts	maennlich	94	3	unrel	links	List4	rechts.bmp	1	3	360962	3	469	361431
RespPr_MoveS1_150	11	64	rechts	maennlich	95	1	neuInnen	neutralInnen	List4	links.bmp	1	1	363014	1	393	363407
RespPr_MoveS1_150	11	64	rechts	maennlich	96	3	neuInnen	neutralInnen	List4	rechts.bmp	1	3	364987	3	548	365535
RespPr_MoveS1_150	11	64	rechts	maennlich	97	1	rel	links	List4	links.bmp	1	1	367120	1	423	367543
RespPr_MoveS1_150	11	64	rechts	maennlich	98	3	rel	rechts	List4	rechts.bmp	1	3	369119	3	480	369599
RespPr_MoveS1_150	11	64	rechts	maennlich	99	1	neuAussen	neutralAussen	List4	links.bmp	1	1	371185	1	382	371567
RespPr_MoveS1_150	11	64	rechts	maennlich	100	3	rel	rechts	List4	rechts.bmp	1	3	373144	3	480	373624
RespPr_MoveS1_150	11	64	rechts	maennlich	101	3	rel	rechts	List4	rechts.bmp	1	3	375210	3	629	375839
RespPr_MoveS1_150	11	64	rechts	maennlich	102	1	unrel	rechts	List4	links.bmp	1	1	377423	1	464	377887
RespPr_MoveS1_150	11	64	rechts	maennlich	103	3	unrel	links	List4	rechts.bmp	1	3	379476	3	531	380007
RespPr_MoveS1_150	11	64	rechts	maennlich	104	1	unrel	rechts	List4	links.bmp	1	1	381595	1	525	382120
RespPr_MoveS1_150	11	64	rechts	maennlich	105	3	neuAussen	neutralAussen	List4	rechts.bmp	1	3	383701	3	451	384152
RespPr_MoveS1_150	11	64	rechts	maennlich	106	3	rel	rechts	List4	rechts.bmp	1	3	385740	3	668	386408
RespPr_MoveS1_150	11	64	rechts	maennlich	107	3	neuAussen	neutralAussen	List4	rechts.bmp	1	3	387993	3	486	388479
RespPr_MoveS1_150	11	64	rechts	maennlich	108	1	rel	links	List4	links.bmp	1	1	390059	1	637	390696
RespPr_MoveS1_150	11	64	rechts	maennlich	109	1	rel	links	List4	links.bmp	1	1	392285	1	482	392767
RespPr_MoveS1_150	11	64	rechts	maennlich	110	3	unrel	links	List4	rechts.bmp	1	3	394351	3	481	394832
RespPr_MoveS1_150	11	64	rechts	maennlich	111	3	unrel	links	List4	rechts.bmp	1	3	396417	3	543	396960
RespPr_MoveS1_150	11	64	rechts	maennlich	112	3	neuAussen	neutralAussen	List4	rechts.bmp	1	3	398536	3	519	399055
RespPr_MoveS1_150	11	64	rechts	maennlich	113	3	unrel	links	List4	rechts.bmp	1	3	400642	3	533	401175
RespPr_MoveS1_150	11	64	rechts	maennlich	114	3	unrel	links	List4	rechts.bmp	1	3	402761	3	534	403295
RespPr_MoveS1_150	11	64	rechts	maennlich	115	3	rel	rechts	List4	rechts.bmp	1	3	404880	3	559	405439
RespPr_MoveS1_150	11	64	rechts	maennlich	116	1	unrel	rechts	List4	links.bmp	1	1	407026	1	437	407463
RespPr_MoveS1_150	11	64	rechts	maennlich	117	3	neuInnen	neutralInnen	List4	rechts.bmp	1	3	409026	3	501	409527
RespPr_MoveS1_150	11	64	rechts	maennlich	118	1	unrel	rechts	List4	links.bmp	1	1	411092	1	444	411536
RespPr_MoveS1_150	11	64	rechts	maennlich	119	1	unrel	rechts	List4	links.bmp	1	1	413118	1	466	413584
RespPr_MoveS1_150	11	64	rechts	maennlich	120	1	rel	links	List4	links.bmp	1	1	415170	1	414	415584
RespPr_MoveS1_150	11	64	rechts	maennlich	121	1	unrel	rechts	List5	links.bmp	1	1	442148	1	452	442600
RespPr_MoveS1_150	11	64	rechts	maennlich	122	1	rel	links	List5	links.bmp	1	1	444187	1	468	444655
RespPr_MoveS1_150	11	64	rechts	maennlich	123	3	unrel	links	List5	rechts.bmp	1	3	446227	3	404	446631
RespPr_MoveS1_150	11	64	rechts	maennlich	124	3	unrel	links	List5	rechts.bmp	1	3	448213	3	475	448688
RespPr_MoveS1_150	11	64	rechts	maennlich	125	3	neuInnen	neutralInnen	List5	rechts.bmp	1	3	450265	3	655	450920
RespPr_MoveS1_150	11	64	rechts	maennlich	126	1	rel	links	List5	links.bmp	1	1	452505	1	430	452935
RespPr_MoveS1_150	11	64	rechts	maennlich	127	1	neuAussen	neutralAussen	List5	links.bmp	1	1	454517	1	427	454944
RespPr_MoveS1_150	11	64	rechts	maennlich	128	3	neuAussen	neutralAussen	List5	rechts.bmp	1	3	456517	3	467	456984
RespPr_MoveS1_150	11	64	rechts	maennlich	129	3	neuInnen	neutralInnen	List5	rechts.bmp	1	3	458569	3	527	459096
RespPr_MoveS1_150	11	64	rechts	maennlich	130	3	rel	rechts	List5	rechts.bmp	1	3	460675	3	436	461111
RespPr_MoveS1_150	11	64	rechts	maennlich	131	3	rel	rechts	List5	rechts.bmp	1	3	462675	3	525	463200
RespPr_MoveS1_150	11	64	rechts	maennlich	132	1	unrel	rechts	List5	links.bmp	1	1	464781	1	506	465287
RespPr_MoveS1_150	11	64	rechts	maennlich	133	1	unrel	rechts	List5	links.bmp	1	1	466873	1	471	467344
RespPr_MoveS1_150	11	64	rechts	maennlich	134	1	unrel	rechts	List5	links.bmp	1	1	468926	1	410	469336
RespPr_MoveS1_150	11	64	rechts	maennlich	135	1	rel	links	List5	links.bmp	1	1	470912	1	455	471367
RespPr_MoveS1_150	11	64	rechts	maennlich	136	1	neuAussen	neutralAussen	List5	links.bmp	1	1	472951	1	424	473375
RespPr_MoveS1_150	11	64	rechts	maennlich	137	3	rel	rechts	List5	rechts.bmp	1	3	474964	3	556	475520
RespPr_MoveS1_150	11	64	rechts	maennlich	138	3	unrel	links	List5	rechts.bmp	1	3	477097	3	398	477495
RespPr_MoveS1_150	11	64	rechts	maennlich	139	3	unrel	links	List5	rechts.bmp	1	3	479083	3	557	479640
RespPr_MoveS1_150	11	64	rechts	maennlich	140	3	neuInnen	neutralInnen	List5	rechts.bmp	1	3	481229	3	475	481704
RespPr_MoveS1_150	11	64	rechts	maennlich	141	1	neuInnen	neutralInnen	List5	links.bmp	1	1	483281	1	503	483784
RespPr_MoveS1_150	11	64	rechts	maennlich	142	1	unrel	rechts	List5	links.bmp	1	1	485361	1	471	485832
RespPr_MoveS1_150	11	64	rechts	maennlich	143	3	rel	rechts	List5	rechts.bmp	1	3	487413	3	826	488239
RespPr_MoveS1_150	11	64	rechts	maennlich	144	1	neuInnen	neutralInnen	List5	links.bmp	1	1	489826	1	502	490328
RespPr_MoveS1_150	11	64	rechts	maennlich	145	1	rel	links	List5	links.bmp	1	1	491892	1	475	492367
RespPr_MoveS1_150	11	64	rechts	maennlich	146	1	neuInnen	neutralInnen	List5	links.bmp	1	1	493944	1	471	494415
RespPr_MoveS1_150	11	64	rechts	maennlich	147	3	neuAussen	neutralAussen	List5	rechts.bmp	1	3	495984	3	616	496600
RespPr_MoveS1_150	11	64	rechts	maennlich	148	1	rel	links	List5	links.bmp	1	1	498183	1	385	498568
RespPr_MoveS1_150	11	64	rechts	maennlich	149	3	neuAussen	neutralAussen	List5	rechts.bmp	1	3	500156	3	660	500816
RespPr_MoveS1_150	11	64	rechts	maennlich	150	1	rel	links	List5	links.bmp	1	1	502395	1	388	502783
RespPr_MoveS1_150	11	64	rechts	maennlich	151	1	neuAussen	neutralAussen	List5	links.bmp	1	1	504368	1	424	504792
RespPr_MoveS1_150	11	64	rechts	maennlich	152	3	rel	rechts	List5	rechts.bmp	1	3	506380	3	412	506792
RespPr_MoveS1_150	11	64	rechts	maennlich	153	1	unrel	rechts	List5	links.bmp	1	1	508380	1	492	508872
RespPr_MoveS1_150	11	64	rechts	maennlich	154	3	rel	rechts	List5	rechts.bmp	1	3	510459	3	357	510816
RespPr_MoveS1_150	11	64	rechts	maennlich	155	3	unrel	links	List5	rechts.bmp	1	3	512405	3	579	512984
RespPr_MoveS1_150	11	64	rechts	maennlich	156	3	unrel	links	List5	rechts.bmp	1	3	514564	3	580	515144
RespPr_MoveS1_150	12	70	rechts	weiblich	1	1	rel	links	List1	links.bmp	1	1	149686	1	19527	169213
RespPr_MoveS1_150	12	70	rechts	weiblich	2	1	neuInnen	neutralInnen	List1	links.bmp	1	1	170799	1	542	171341
RespPr_MoveS1_150	12	70	rechts	weiblich	3	3	rel	rechts	List1	rechts.bmp	1	3	172918	3	631	173549
RespPr_MoveS1_150	12	70	rechts	weiblich	4	3	neuInnen	neutralInnen	List1	rechts.bmp	1	3	175130	3	579	175709
RespPr_MoveS1_150	12	70	rechts	weiblich	5	3	neuAussen	neutralAussen	List1	rechts.bmp	1	3	177290	3	571	177861
RespPr_MoveS1_150	12	70	rechts	weiblich	6	3	unrel	links	List1	rechts.bmp	1	3	179436	3	489	179925
RespPr_MoveS1_150	12	70	rechts	weiblich	7	3	unrel	links	List1	rechts.bmp	1	3	181502	3	551	182053
RespPr_MoveS1_150	12	70	rechts	weiblich	8	1	unrel	rechts	List1	links.bmp	1	1	183634	1	675	184309
RespPr_MoveS1_150	12	70	rechts	weiblich	9	1	rel	links	List1	links.bmp	1	1	185887	1	582	186469
RespPr_MoveS1_150	12	70	rechts	weiblich	10	1	neuAussen	neutralAussen	List1	links.bmp	1	1	188046	1	567	188613
RespPr_MoveS1_150	12	70	rechts	weiblich	11	3	rel	rechts	List1	rechts.bmp	1	3	190192	3	445	190637
RespPr_MoveS1_150	12	70	rechts	weiblich	12	1	unrel	rechts	List1	links.bmp	1	1	192218	1	491	192709
RespPr_MoveS1_150	12	70	rechts	weiblich	13	3	neuAussen	neutralAussen	List2	rechts.bmp	1	3	209879	3	662	210541
RespPr_MoveS1_150	12	70	rechts	weiblich	14	3	neuInnen	neutralInnen	List2	rechts.bmp	1	3	212118	3	583	212701
RespPr_MoveS1_150	12	70	rechts	weiblich	15	3	unrel	links	List2	rechts.bmp	1	3	214278	3	399	214677
RespPr_MoveS1_150	12	70	rechts	weiblich	16	1	rel	links	List2	links.bmp	1	1	216264	1	573	216837
RespPr_MoveS1_150	12	70	rechts	weiblich	17	1	neuAussen	neutralAussen	List2	links.bmp	1	1	218423	1	494	218917
RespPr_MoveS1_150	12	70	rechts	weiblich	18	1	neuAussen	neutralAussen	List2	links.bmp	1	1	220502	1	439	220941
RespPr_MoveS1_150	12	70	rechts	weiblich	19	1	rel	links	List2	links.bmp	1	1	222528	1	405	222933
RespPr_MoveS1_150	12	70	rechts	weiblich	20	3	unrel	links	List2	rechts.bmp	1	3	224514	3	555	225069
RespPr_MoveS1_150	12	70	rechts	weiblich	21	3	unrel	links	List2	rechts.bmp	1	3	226647	3	469	227116
RespPr_MoveS1_150	12	70	rechts	weiblich	22	3	rel	rechts	List2	rechts.bmp	1	3	228699	3	529	229228
RespPr_MoveS1_150	12	70	rechts	weiblich	23	3	rel	rechts	List2	rechts.bmp	1	3	230805	3	384	231189
RespPr_MoveS1_150	12	70	rechts	weiblich	24	1	rel	links	List2	links.bmp	1	1	232765	1	416	233181
RespPr_MoveS1_150	12	70	rechts	weiblich	25	3	rel	rechts	List2	rechts.bmp	1	3	234751	3	366	235117
RespPr_MoveS1_150	12	70	rechts	weiblich	26	3	rel	rechts	List2	rechts.bmp	1	3	236697	3	436	237133
RespPr_MoveS1_150	12	70	rechts	weiblich	27	1	unrel	rechts	List2	links.bmp	1	1	238709	1	576	239285
RespPr_MoveS1_150	12	70	rechts	weiblich	28	1	neuInnen	neutralInnen	List2	links.bmp	1	1	240869	1	544	241413
RespPr_MoveS1_150	12	70	rechts	weiblich	29	3	neuInnen	neutralInnen	List2	rechts.bmp	1	3	243001	3	420	243421
RespPr_MoveS1_150	12	70	rechts	weiblich	30	3	rel	rechts	List2	rechts.bmp	1	3	245001	3	380	245381
RespPr_MoveS1_150	12	70	rechts	weiblich	31	1	rel	links	List2	links.bmp	1	1	246947	1	450	247397
RespPr_MoveS1_150	12	70	rechts	weiblich	32	1	unrel	rechts	List2	links.bmp	1	1	248973	1	536	249509
RespPr_MoveS1_150	12	70	rechts	weiblich	33	1	unrel	rechts	List2	links.bmp	1	1	251079	1	542	251621
RespPr_MoveS1_150	12	70	rechts	weiblich	34	1	neuAussen	neutralAussen	List2	links.bmp	1	1	253185	1	396	253581
RespPr_MoveS1_150	12	70	rechts	weiblich	35	1	neuInnen	neutralInnen	List2	links.bmp	1	1	255157	1	456	255613
RespPr_MoveS1_150	12	70	rechts	weiblich	36	3	unrel	links	List2	rechts.bmp	1	3	257197	3	504	257701
RespPr_MoveS1_150	12	70	rechts	weiblich	37	1	neuInnen	neutralInnen	List2	links.bmp	1	1	259289	1	460	259749
RespPr_MoveS1_150	12	70	rechts	weiblich	38	1	unrel	rechts	List2	links.bmp	1	1	261329	1	564	261893
RespPr_MoveS1_150	12	70	rechts	weiblich	39	3	neuInnen	neutralInnen	List2	rechts.bmp	1	3	263475	3	418	263893
RespPr_MoveS1_150	12	70	rechts	weiblich	40	3	neuAussen	neutralAussen	List2	rechts.bmp	1	3	265474	3	571	266045
RespPr_MoveS1_150	12	70	rechts	weiblich	41	1	unrel	rechts	List2	links.bmp	1	1	267633	1	380	268013
RespPr_MoveS1_150	12	70	rechts	weiblich	42	3	rel	rechts	List2	rechts.bmp	1	3	269593	3	540	270133
RespPr_MoveS1_150	12	70	rechts	weiblich	43	3	unrel	links	List2	rechts.bmp	1	3	271712	3	565	272277
RespPr_MoveS1_150	12	70	rechts	weiblich	44	1	unrel	rechts	List2	links.bmp	1	1	273858	1	443	274301
RespPr_MoveS1_150	12	70	rechts	weiblich	45	3	neuAussen	neutralAussen	List2	rechts.bmp	1	3	275884	3	409	276293
RespPr_MoveS1_150	12	70	rechts	weiblich	46	3	unrel	links	List2	rechts.bmp	1	3	277870	3	463	278333
RespPr_MoveS1_150	12	70	rechts	weiblich	47	1	rel	links	List2	links.bmp	1	1	279909	1	527	280436
RespPr_MoveS1_150	12	70	rechts	weiblich	48	1	rel	links	List2	links.bmp	1	1	282015	1	398	282413
RespPr_MoveS1_150	12	70	rechts	weiblich	49	1	rel	links	List3	links.bmp	1	1	288200	1	620	288820
RespPr_MoveS1_150	12	70	rechts	weiblich	50	1	rel	links	List3	links.bmp	1	1	290386	1	395	290781
RespPr_MoveS1_150	12	70	rechts	weiblich	51	1	rel	links	List3	links.bmp	1	1	292358	1	383	292741
RespPr_MoveS1_150	12	70	rechts	weiblich	52	3	unrel	links	List3	rechts.bmp	1	3	294318	3	567	294885
RespPr_MoveS1_150	12	70	rechts	weiblich	53	3	rel	rechts	List3	rechts.bmp	1	3	296464	3	525	296989
RespPr_MoveS1_150	12	70	rechts	weiblich	54	1	unrel	rechts	List3	links.bmp	1	1	298570	1	507	299077
RespPr_MoveS1_150	12	70	rechts	weiblich	55	3	rel	rechts	List3	rechts.bmp	1	3	300662	3	367	301029
RespPr_MoveS1_150	12	70	rechts	weiblich	56	1	neuInnen	neutralInnen	List3	links.bmp	1	1	302608	1	533	303141
RespPr_MoveS1_150	12	70	rechts	weiblich	57	3	unrel	links	List3	rechts.bmp	1	3	304728	3	541	305269
RespPr_MoveS1_150	12	70	rechts	weiblich	58	1	neuInnen	neutralInnen	List3	links.bmp	1	1	306847	1	494	307341
RespPr_MoveS1_150	12	70	rechts	weiblich	59	1	neuAussen	neutralAussen	List3	links.bmp	1	1	308926	1	623	309549
RespPr_MoveS1_150	12	70	rechts	weiblich	60	3	unrel	links	List3	rechts.bmp	1	3	311126	3	534	311660
RespPr_MoveS1_150	12	70	rechts	weiblich	61	3	rel	rechts	List3	rechts.bmp	1	3	313245	3	448	313693
RespPr_MoveS1_150	12	70	rechts	weiblich	62	1	neuAussen	neutralAussen	List3	links.bmp	1	1	315271	1	358	315629
RespPr_MoveS1_150	12	70	rechts	weiblich	63	1	unrel	rechts	List3	links.bmp	1	1	317217	1	476	317693
RespPr_MoveS1_150	12	70	rechts	weiblich	64	1	unrel	rechts	List3	links.bmp	1	1	319269	1	392	319661
RespPr_MoveS1_150	12	70	rechts	weiblich	65	3	rel	rechts	List3	rechts.bmp	1	3	321242	3	363	321605
RespPr_MoveS1_150	12	70	rechts	weiblich	66	1	unrel	rechts	List3	links.bmp	1	1	323188	1	417	323605
RespPr_MoveS1_150	12	70	rechts	weiblich	67	3	unrel	links	List3	rechts.bmp	1	3	325188	3	361	325549
RespPr_MoveS1_150	12	70	rechts	weiblich	68	3	neuInnen	neutralInnen	List3	rechts.bmp	1	3	327134	3	503	327637
RespPr_MoveS1_150	12	70	rechts	weiblich	69	3	rel	rechts	List3	rechts.bmp	1	3	329226	3	371	329597
RespPr_MoveS1_150	12	70	rechts	weiblich	70	3	neuInnen	neutralInnen	List3	rechts.bmp	1	3	331186	3	483	331669
RespPr_MoveS1_150	12	70	rechts	weiblich	71	1	unrel	rechts	List3	links.bmp	1	1	333252	1	425	333677
RespPr_MoveS1_150	12	70	rechts	weiblich	72	1	neuInnen	neutralInnen	List3	links.bmp	1	1	335264	1	485	335749
RespPr_MoveS1_150	12	70	rechts	weiblich	73	1	rel	links	List3	links.bmp	1	1	337330	1	435	337765
RespPr_MoveS1_150	12	70	rechts	weiblich	74	3	neuAussen	neutralAussen	List3	rechts.bmp	1	3	339343	3	509	339852
RespPr_MoveS1_150	12	70	rechts	weiblich	75	3	unrel	links	List3	rechts.bmp	1	3	341435	3	482	341917
RespPr_MoveS1_150	12	70	rechts	weiblich	76	3	rel	rechts	List3	rechts.bmp	1	3	343501	3	536	344037
RespPr_MoveS1_150	12	70	rechts	weiblich	77	1	rel	links	List3	links.bmp	1	1	345621	1	520	346141
RespPr_MoveS1_150	12	70	rechts	weiblich	78	3	neuAussen	neutralAussen	List3	rechts.bmp	1	3	347727	3	558	348285
RespPr_MoveS1_150	12	70	rechts	weiblich	79	1	unrel	rechts	List3	links.bmp	1	1	349873	1	476	350349
RespPr_MoveS1_150	12	70	rechts	weiblich	80	3	neuAussen	neutralAussen	List3	rechts.bmp	1	3	351925	3	415	352340
RespPr_MoveS1_150	12	70	rechts	weiblich	81	3	unrel	links	List3	rechts.bmp	1	3	353925	3	480	354405
RespPr_MoveS1_150	12	70	rechts	weiblich	82	1	neuAussen	neutralAussen	List3	links.bmp	1	1	355991	1	390	356381
RespPr_MoveS1_150	12	70	rechts	weiblich	83	3	neuInnen	neutralInnen	List3	rechts.bmp	1	3	357963	3	394	358357
RespPr_MoveS1_150	12	70	rechts	weiblich	84	1	rel	links	List3	links.bmp	1	1	359923	1	338	360261
RespPr_MoveS1_150	12	70	rechts	weiblich	85	1	rel	links	List4	links.bmp	1	1	373718	1	535	374253
RespPr_MoveS1_150	12	70	rechts	weiblich	86	3	unrel	links	List4	rechts.bmp	1	3	375837	3	496	376333
RespPr_MoveS1_150	12	70	rechts	weiblich	87	1	unrel	rechts	List4	links.bmp	1	1	377917	1	424	378341
RespPr_MoveS1_150	12	70	rechts	weiblich	88	1	neuInnen	neutralInnen	List4	links.bmp	1	1	379929	1	476	380405
RespPr_MoveS1_150	12	70	rechts	weiblich	89	3	rel	rechts	List4	rechts.bmp	1	3	381969	3	428	382397
RespPr_MoveS1_150	12	70	rechts	weiblich	90	3	unrel	links	List4	rechts.bmp	1	3	383981	3	456	384437
RespPr_MoveS1_150	12	70	rechts	weiblich	91	3	neuAussen	neutralAussen	List4	rechts.bmp	1	3	386021	3	384	386405
RespPr_MoveS1_150	12	70	rechts	weiblich	92	1	rel	links	List4	links.bmp	1	1	387993	1	508	388501
RespPr_MoveS1_150	12	70	rechts	weiblich	93	1	rel	links	List4	links.bmp	1	1	390073	1	307	390380
RespPr_MoveS1_150	12	70	rechts	weiblich	94	1	unrel	rechts	List4	links.bmp	1	1	391965	1	663	392628
RespPr_MoveS1_150	12	70	rechts	weiblich	95	1	unrel	rechts	List4	links.bmp	1	1	394205	1	504	394709
RespPr_MoveS1_150	12	70	rechts	weiblich	96	1	rel	links	List4	links.bmp	1	1	396297	1	532	396829
RespPr_MoveS1_150	12	70	rechts	weiblich	97	1	neuAussen	neutralAussen	List4	links.bmp	1	1	398417	1	436	398853
RespPr_MoveS1_150	12	70	rechts	weiblich	98	1	rel	links	List4	links.bmp	1	1	400429	1	360	400789
RespPr_MoveS1_150	12	70	rechts	weiblich	99	3	rel	rechts	List4	rechts.bmp	1	3	402375	3	358	402733
RespPr_MoveS1_150	12	70	rechts	weiblich	100	3	neuInnen	neutralInnen	List4	rechts.bmp	1	3	404321	3	524	404845
RespPr_MoveS1_150	12	70	rechts	weiblich	101	1	unrel	rechts	List4	links.bmp	1	1	406427	1	410	406837
RespPr_MoveS1_150	12	70	rechts	weiblich	102	1	neuInnen	neutralInnen	List4	links.bmp	1	1	408427	1	514	408941
RespPr_MoveS1_150	12	70	rechts	weiblich	103	3	unrel	links	List4	rechts.bmp	1	3	410519	3	494	411013
RespPr_MoveS1_150	12	70	rechts	weiblich	104	1	unrel	rechts	List4	links.bmp	1	1	412599	1	510	413109
RespPr_MoveS1_150	12	70	rechts	weiblich	105	1	neuAussen	neutralAussen	List4	links.bmp	1	1	414691	1	338	415029
RespPr_MoveS1_150	12	70	rechts	weiblich	106	3	neuAussen	neutralAussen	List4	rechts.bmp	1	3	416611	3	370	416981
RespPr_MoveS1_150	12	70	rechts	weiblich	107	1	rel	links	List4	links.bmp	1	1	418570	1	315	418885
RespPr_MoveS1_150	12	70	rechts	weiblich	108	1	unrel	rechts	List4	links.bmp	1	1	420463	1	526	420989
RespPr_MoveS1_150	12	70	rechts	weiblich	109	3	unrel	links	List4	rechts.bmp	1	3	422569	3	388	422957
RespPr_MoveS1_150	12	70	rechts	weiblich	110	3	rel	rechts	List4	rechts.bmp	1	3	424541	3	520	425061
RespPr_MoveS1_150	12	70	rechts	weiblich	111	3	neuInnen	neutralInnen	List4	rechts.bmp	1	3	426647	3	486	427133
RespPr_MoveS1_150	12	70	rechts	weiblich	112	1	neuAussen	neutralAussen	List4	links.bmp	1	1	428713	1	348	429061
RespPr_MoveS1_150	12	70	rechts	weiblich	113	3	unrel	links	List4	rechts.bmp	1	3	430646	3	407	431053
RespPr_MoveS1_150	12	70	rechts	weiblich	114	1	neuInnen	neutralInnen	List4	links.bmp	1	1	432632	1	437	433069
RespPr_MoveS1_150	12	70	rechts	weiblich	115	3	neuInnen	neutralInnen	List4	rechts.bmp	1	3	434658	3	395	435053
RespPr_MoveS1_150	12	70	rechts	weiblich	116	3	unrel	links	List4	rechts.bmp	1	3	436631	3	390	437021
RespPr_MoveS1_150	12	70	rechts	weiblich	117	3	rel	rechts	List4	rechts.bmp	1	3	438603	3	450	439053
RespPr_MoveS1_150	12	70	rechts	weiblich	118	3	rel	rechts	List4	rechts.bmp	1	3	440629	3	400	441029
RespPr_MoveS1_150	12	70	rechts	weiblich	119	3	rel	rechts	List4	rechts.bmp	1	3	442615	3	358	442973
RespPr_MoveS1_150	12	70	rechts	weiblich	120	3	neuAussen	neutralAussen	List4	rechts.bmp	1	3	444561	3	356	444917
RespPr_MoveS1_150	12	70	rechts	weiblich	121	3	unrel	links	List5	rechts.bmp	1	3	449920	3	485	450405
RespPr_MoveS1_150	12	70	rechts	weiblich	122	3	neuInnen	neutralInnen	List5	rechts.bmp	1	3	451986	3	459	452445
RespPr_MoveS1_150	12	70	rechts	weiblich	123	3	neuInnen	neutralInnen	List5	rechts.bmp	1	3	454025	3	372	454397
RespPr_MoveS1_150	12	70	rechts	weiblich	124	3	rel	rechts	List5	rechts.bmp	1	3	455984	3	373	456357
RespPr_MoveS1_150	12	70	rechts	weiblich	125	1	unrel	rechts	List5	links.bmp	1	1	457944	1	533	458477
RespPr_MoveS1_150	12	70	rechts	weiblich	126	1	rel	links	List5	links.bmp	1	1	460063	1	533	460596
RespPr_MoveS1_150	12	70	rechts	weiblich	127	1	rel	links	List5	links.bmp	1	1	462182	1	375	462557
RespPr_MoveS1_150	12	70	rechts	weiblich	128	3	unrel	links	List5	rechts.bmp	1	3	464142	3	495	464637
RespPr_MoveS1_150	12	70	rechts	weiblich	129	1	rel	links	List5	links.bmp	1	1	466221	1	495	466716
RespPr_MoveS1_150	12	70	rechts	weiblich	130	1	unrel	rechts	List5	links.bmp	1	1	468300	1	505	468805
RespPr_MoveS1_150	12	70	rechts	weiblich	131	3	rel	rechts	List5	rechts.bmp	1	3	470393	3	419	470812
RespPr_MoveS1_150	12	70	rechts	weiblich	132	3	unrel	links	List5	rechts.bmp	1	3	472392	3	501	472893
RespPr_MoveS1_150	12	70	rechts	weiblich	133	3	unrel	links	List5	rechts.bmp	0	3	474471	1	382	474853
RespPr_MoveS1_150	12	70	rechts	weiblich	134	1	neuInnen	neutralInnen	List5	links.bmp	1	1	476431	1	445	476876
RespPr_MoveS1_150	12	70	rechts	weiblich	135	1	rel	links	List5	links.bmp	1	1	478457	1	524	478981
RespPr_MoveS1_150	12	70	rechts	weiblich	136	1	unrel	rechts	List5	links.bmp	1	1	480563	1	506	481069
RespPr_MoveS1_150	12	70	rechts	weiblich	137	1	rel	links	List5	links.bmp	1	1	482655	1	558	483213
RespPr_MoveS1_150	12	70	rechts	weiblich	138	3	unrel	links	List5	rechts.bmp	1	3	484801	3	484	485285
RespPr_MoveS1_150	12	70	rechts	weiblich	139	1	unrel	rechts	List5	links.bmp	1	1	486867	1	553	487420
RespPr_MoveS1_150	12	70	rechts	weiblich	140	3	unrel	links	List5	rechts.bmp	1	3	488987	3	370	489357
RespPr_MoveS1_150	12	70	rechts	weiblich	141	1	neuAussen	neutralAussen	List5	links.bmp	1	1	490933	1	376	491309
RespPr_MoveS1_150	12	70	rechts	weiblich	142	3	neuInnen	neutralInnen	List5	rechts.bmp	1	3	492879	3	406	493285
RespPr_MoveS1_150	12	70	rechts	weiblich	143	1	unrel	rechts	List5	links.bmp	1	1	494865	1	515	495380
RespPr_MoveS1_150	12	70	rechts	weiblich	144	3	neuAussen	neutralAussen	List5	rechts.bmp	1	3	496957	3	456	497413
RespPr_MoveS1_150	12	70	rechts	weiblich	145	3	rel	rechts	List5	rechts.bmp	1	3	498997	3	464	499461
RespPr_MoveS1_150	12	70	rechts	weiblich	146	1	neuAussen	neutralAussen	List5	links.bmp	1	1	501049	1	412	501461
RespPr_MoveS1_150	12	70	rechts	weiblich	147	1	unrel	rechts	List5	links.bmp	1	1	503049	1	491	503540
RespPr_MoveS1_150	12	70	rechts	weiblich	148	1	rel	links	List5	links.bmp	1	1	505115	1	530	505645
RespPr_MoveS1_150	12	70	rechts	weiblich	149	1	neuInnen	neutralInnen	List5	links.bmp	1	1	507221	1	392	507613
RespPr_MoveS1_150	12	70	rechts	weiblich	150	1	neuInnen	neutralInnen	List5	links.bmp	1	1	509193	1	428	509621
RespPr_MoveS1_150	12	70	rechts	weiblich	151	1	neuAussen	neutralAussen	List5	links.bmp	1	1	511193	1	420	511613
RespPr_MoveS1_150	12	70	rechts	weiblich	152	3	neuAussen	neutralAussen	List5	rechts.bmp	1	3	513179	3	530	513709
RespPr_MoveS1_150	12	70	rechts	weiblich	153	3	neuAussen	neutralAussen	List5	rechts.bmp	1	3	515285	3	512	515797
RespPr_MoveS1_150	12	70	rechts	weiblich	154	3	rel	rechts	List5	rechts.bmp	1	3	517377	3	460	517837
RespPr_MoveS1_150	12	70	rechts	weiblich	155	3	rel	rechts	List5	rechts.bmp	1	3	519417	3	588	520005
RespPr_MoveS1_150	12	70	rechts	weiblich	156	3	rel	rechts	List5	rechts.bmp	1	3	521589	3	496	522085
RespPr_MoveS1_150	13	64	rechts	weiblich	1	3	unrel	links	List1	rechts.bmp	1	3	109415	3	739	110154
RespPr_MoveS1_150	13	64	rechts	weiblich	2	1	unrel	rechts	List1	links.bmp	1	1	111734	1	571	112305
RespPr_MoveS1_150	13	64	rechts	weiblich	3	3	unrel	links	List1	rechts.bmp	1	3	113894	3	548	114442
RespPr_MoveS1_150	13	64	rechts	weiblich	4	1	neuInnen	neutralInnen	List1	links.bmp	1	1	116026	1	536	116562
RespPr_MoveS1_150	13	64	rechts	weiblich	5	1	rel	links	List1	links.bmp	1	1	118146	1	536	118682
RespPr_MoveS1_150	13	64	rechts	weiblich	6	3	rel	rechts	List1	rechts.bmp	1	3	120252	3	469	120721
RespPr_MoveS1_150	13	64	rechts	weiblich	7	3	rel	rechts	List1	rechts.bmp	1	3	122304	3	497	122801
RespPr_MoveS1_150	13	64	rechts	weiblich	8	3	neuAussen	neutralAussen	List1	rechts.bmp	1	3	124384	3	529	124913
RespPr_MoveS1_150	13	64	rechts	weiblich	9	1	rel	links	List1	links.bmp	1	1	126490	1	543	127033
RespPr_MoveS1_150	13	64	rechts	weiblich	10	1	unrel	rechts	List1	links.bmp	1	1	128609	1	592	129201
RespPr_MoveS1_150	13	64	rechts	weiblich	11	1	neuAussen	neutralAussen	List1	links.bmp	1	1	130782	1	540	131322
RespPr_MoveS1_150	13	64	rechts	weiblich	12	3	neuInnen	neutralInnen	List1	rechts.bmp	1	3	132901	3	500	133401
RespPr_MoveS1_150	13	64	rechts	weiblich	13	1	neuInnen	neutralInnen	List2	links.bmp	1	1	154054	1	604	154658
RespPr_MoveS1_150	13	64	rechts	weiblich	14	1	unrel	rechts	List2	links.bmp	1	1	156240	1	506	156746
RespPr_MoveS1_150	13	64	rechts	weiblich	15	3	unrel	links	List2	rechts.bmp	1	3	158332	3	422	158754
RespPr_MoveS1_150	13	64	rechts	weiblich	16	1	rel	links	List2	links.bmp	1	1	160332	1	429	160761
RespPr_MoveS1_150	13	64	rechts	weiblich	17	1	neuAussen	neutralAussen	List2	links.bmp	1	1	162344	1	505	162849
RespPr_MoveS1_150	13	64	rechts	weiblich	18	3	neuInnen	neutralInnen	List2	rechts.bmp	1	3	164424	3	521	164945
RespPr_MoveS1_150	13	64	rechts	weiblich	19	3	rel	rechts	List2	rechts.bmp	1	3	166530	3	455	166985
RespPr_MoveS1_150	13	64	rechts	weiblich	20	3	unrel	links	List2	rechts.bmp	1	3	168556	3	542	169098
RespPr_MoveS1_150	13	64	rechts	weiblich	21	1	neuAussen	neutralAussen	List2	links.bmp	1	1	170662	1	484	171146
RespPr_MoveS1_150	13	64	rechts	weiblich	22	3	neuInnen	neutralInnen	List2	rechts.bmp	1	3	172728	3	458	173186
RespPr_MoveS1_150	13	64	rechts	weiblich	23	1	neuAussen	neutralAussen	List2	links.bmp	1	1	174754	1	431	175185
RespPr_MoveS1_150	13	64	rechts	weiblich	24	1	neuInnen	neutralInnen	List2	links.bmp	1	1	176766	1	531	177297
RespPr_MoveS1_150	13	64	rechts	weiblich	25	3	unrel	links	List2	rechts.bmp	1	3	178886	3	387	179273
RespPr_MoveS1_150	13	64	rechts	weiblich	26	3	rel	rechts	List2	rechts.bmp	1	3	180858	3	456	181314
RespPr_MoveS1_150	13	64	rechts	weiblich	27	3	rel	rechts	List2	rechts.bmp	1	3	182898	3	455	183353
RespPr_MoveS1_150	13	64	rechts	weiblich	28	1	rel	links	List2	links.bmp	1	1	184937	1	424	185361
RespPr_MoveS1_150	13	64	rechts	weiblich	29	3	unrel	links	List2	rechts.bmp	1	3	186950	3	491	187441
RespPr_MoveS1_150	13	64	rechts	weiblich	30	3	neuAussen	neutralAussen	List2	rechts.bmp	1	3	189029	3	476	189505
RespPr_MoveS1_150	13	64	rechts	weiblich	31	1	rel	links	List2	links.bmp	1	1	191082	1	567	191649
RespPr_MoveS1_150	13	64	rechts	weiblich	32	1	rel	links	List2	links.bmp	1	1	193228	1	429	193657
RespPr_MoveS1_150	13	64	rechts	weiblich	33	3	rel	rechts	List2	rechts.bmp	1	3	195240	3	457	195697
RespPr_MoveS1_150	13	64	rechts	weiblich	34	1	unrel	rechts	List2	links.bmp	1	1	197280	1	449	197729
RespPr_MoveS1_150	13	64	rechts	weiblich	35	3	neuAussen	neutralAussen	List2	rechts.bmp	1	3	199306	3	391	199697
RespPr_MoveS1_150	13	64	rechts	weiblich	36	3	unrel	links	List2	rechts.bmp	1	3	201278	3	588	201866
RespPr_MoveS1_150	13	64	rechts	weiblich	37	1	unrel	rechts	List2	links.bmp	1	1	203451	1	446	203897
RespPr_MoveS1_150	13	64	rechts	weiblich	38	3	neuInnen	neutralInnen	List2	rechts.bmp	1	3	205477	3	420	205897
RespPr_MoveS1_150	13	64	rechts	weiblich	39	1	rel	links	List2	links.bmp	1	1	207476	1	845	208321
RespPr_MoveS1_150	13	64	rechts	weiblich	40	1	unrel	rechts	List2	links.bmp	1	1	209889	1	488	210377
RespPr_MoveS1_150	13	64	rechts	weiblich	41	1	neuInnen	neutralInnen	List2	links.bmp	1	1	211955	1	471	212426
RespPr_MoveS1_150	13	64	rechts	weiblich	42	1	rel	links	List2	links.bmp	1	1	214007	1	515	214522
RespPr_MoveS1_150	13	64	rechts	weiblich	43	3	rel	rechts	List2	rechts.bmp	1	3	216100	3	445	216545
RespPr_MoveS1_150	13	64	rechts	weiblich	44	3	neuAussen	neutralAussen	List2	rechts.bmp	1	3	218126	3	555	218681
RespPr_MoveS1_150	13	64	rechts	weiblich	45	3	rel	rechts	List2	rechts.bmp	1	3	220259	3	430	220689
RespPr_MoveS1_150	13	64	rechts	weiblich	46	3	unrel	links	List2	rechts.bmp	1	3	222271	3	443	222714
RespPr_MoveS1_150	13	64	rechts	weiblich	47	1	unrel	rechts	List2	links.bmp	1	1	224297	1	433	224730
RespPr_MoveS1_150	13	64	rechts	weiblich	48	1	unrel	rechts	List2	links.bmp	1	1	226310	1	531	226841
RespPr_MoveS1_150	13	64	rechts	weiblich	49	3	rel	rechts	List3	rechts.bmp	1	3	234081	3	521	234602
RespPr_MoveS1_150	13	64	rechts	weiblich	50	3	unrel	links	List3	rechts.bmp	1	3	236187	3	414	236601
RespPr_MoveS1_150	13	64	rechts	weiblich	51	3	rel	rechts	List3	rechts.bmp	1	3	238173	3	421	238594
RespPr_MoveS1_150	13	64	rechts	weiblich	52	1	rel	links	List3	links.bmp	1	1	240159	1	601	240760
RespPr_MoveS1_150	13	64	rechts	weiblich	53	3	rel	rechts	List3	rechts.bmp	1	3	242345	3	521	242866
RespPr_MoveS1_150	13	64	rechts	weiblich	54	3	unrel	links	List3	rechts.bmp	1	3	244451	3	510	244961
RespPr_MoveS1_150	13	64	rechts	weiblich	55	3	unrel	links	List3	rechts.bmp	1	3	246543	3	483	247026
RespPr_MoveS1_150	13	64	rechts	weiblich	56	1	unrel	rechts	List3	links.bmp	1	1	248609	1	521	249130
RespPr_MoveS1_150	13	64	rechts	weiblich	57	3	neuInnen	neutralInnen	List3	rechts.bmp	1	3	250715	3	463	251178
RespPr_MoveS1_150	13	64	rechts	weiblich	58	1	neuInnen	neutralInnen	List3	links.bmp	1	1	252755	1	462	253217
RespPr_MoveS1_150	13	64	rechts	weiblich	59	1	neuInnen	neutralInnen	List3	links.bmp	1	1	254794	1	504	255298
RespPr_MoveS1_150	13	64	rechts	weiblich	60	1	rel	links	List3	links.bmp	1	1	256886	1	427	257313
RespPr_MoveS1_150	13	64	rechts	weiblich	61	1	neuAussen	neutralAussen	List3	links.bmp	1	1	258899	1	414	259313
RespPr_MoveS1_150	13	64	rechts	weiblich	62	1	unrel	rechts	List3	links.bmp	1	1	260899	1	494	261393
RespPr_MoveS1_150	13	64	rechts	weiblich	63	1	neuInnen	neutralInnen	List3	links.bmp	1	1	262978	1	527	263505
RespPr_MoveS1_150	13	64	rechts	weiblich	64	1	rel	links	List3	links.bmp	1	1	265084	1	518	265602
RespPr_MoveS1_150	13	64	rechts	weiblich	65	3	rel	rechts	List3	rechts.bmp	1	3	267190	3	508	267698
RespPr_MoveS1_150	13	64	rechts	weiblich	66	1	neuAussen	neutralAussen	List3	links.bmp	1	1	269282	1	495	269777
RespPr_MoveS1_150	13	64	rechts	weiblich	67	3	neuAussen	neutralAussen	List3	rechts.bmp	1	3	271362	3	471	271833
RespPr_MoveS1_150	13	64	rechts	weiblich	68	3	neuAussen	neutralAussen	List3	rechts.bmp	1	3	273414	3	452	273866
RespPr_MoveS1_150	13	64	rechts	weiblich	69	3	unrel	links	List3	rechts.bmp	1	3	275454	3	460	275914
RespPr_MoveS1_150	13	64	rechts	weiblich	70	3	neuInnen	neutralInnen	List3	rechts.bmp	1	3	277480	3	417	277897
RespPr_MoveS1_150	13	64	rechts	weiblich	71	3	unrel	links	List3	rechts.bmp	1	3	279466	3	464	279930
RespPr_MoveS1_150	13	64	rechts	weiblich	72	1	rel	links	List3	links.bmp	1	1	281518	1	572	282090
RespPr_MoveS1_150	13	64	rechts	weiblich	73	3	rel	rechts	List3	rechts.bmp	1	3	283678	3	499	284177
RespPr_MoveS1_150	13	64	rechts	weiblich	74	3	neuInnen	neutralInnen	List3	rechts.bmp	1	3	285757	3	452	286209
RespPr_MoveS1_150	13	64	rechts	weiblich	75	1	neuAussen	neutralAussen	List3	links.bmp	1	1	287796	1	478	288274
RespPr_MoveS1_150	13	64	rechts	weiblich	76	1	rel	links	List3	links.bmp	1	1	289862	1	467	290329
RespPr_MoveS1_150	13	64	rechts	weiblich	77	3	unrel	links	List3	rechts.bmp	1	3	291915	3	503	292418
RespPr_MoveS1_150	13	64	rechts	weiblich	78	3	neuAussen	neutralAussen	List3	rechts.bmp	1	3	293994	3	463	294457
RespPr_MoveS1_150	13	64	rechts	weiblich	79	1	unrel	rechts	List3	links.bmp	1	1	296034	1	488	296522
RespPr_MoveS1_150	13	64	rechts	weiblich	80	1	unrel	rechts	List3	links.bmp	1	1	298100	1	542	298642
RespPr_MoveS1_150	13	64	rechts	weiblich	81	1	unrel	rechts	List3	links.bmp	1	1	300219	1	430	300649
RespPr_MoveS1_150	13	64	rechts	weiblich	82	3	rel	rechts	List3	rechts.bmp	1	3	302231	3	507	302738
RespPr_MoveS1_150	13	64	rechts	weiblich	83	1	unrel	rechts	List3	links.bmp	1	1	304324	1	541	304865
RespPr_MoveS1_150	13	64	rechts	weiblich	84	1	rel	links	List3	links.bmp	1	1	306443	1	534	306977
RespPr_MoveS1_150	13	64	rechts	weiblich	85	1	neuAussen	neutralAussen	List4	links.bmp	1	1	319652	1	573	320225
RespPr_MoveS1_150	13	64	rechts	weiblich	86	3	neuInnen	neutralInnen	List4	rechts.bmp	1	3	321812	3	469	322281
RespPr_MoveS1_150	13	64	rechts	weiblich	87	3	unrel	links	List4	rechts.bmp	1	3	323864	3	457	324321
RespPr_MoveS1_150	13	64	rechts	weiblich	88	3	neuInnen	neutralInnen	List4	rechts.bmp	1	3	325904	3	433	326337
RespPr_MoveS1_150	13	64	rechts	weiblich	89	3	rel	rechts	List4	rechts.bmp	1	3	327916	3	405	328321
RespPr_MoveS1_150	13	64	rechts	weiblich	90	1	unrel	rechts	List4	links.bmp	1	1	329902	1	483	330385
RespPr_MoveS1_150	13	64	rechts	weiblich	91	1	rel	links	List4	links.bmp	1	1	331968	1	489	332457
RespPr_MoveS1_150	13	64	rechts	weiblich	92	3	rel	rechts	List4	rechts.bmp	1	3	334034	3	408	334442
RespPr_MoveS1_150	13	64	rechts	weiblich	93	3	rel	rechts	List4	rechts.bmp	1	3	336020	3	397	336417
RespPr_MoveS1_150	13	64	rechts	weiblich	94	1	rel	links	List4	links.bmp	1	1	337980	1	534	338514
RespPr_MoveS1_150	13	64	rechts	weiblich	95	1	rel	links	List4	links.bmp	1	1	340086	1	499	340585
RespPr_MoveS1_150	13	64	rechts	weiblich	96	1	rel	links	List4	links.bmp	1	1	342165	1	501	342666
RespPr_MoveS1_150	13	64	rechts	weiblich	97	1	rel	links	List4	links.bmp	1	1	344244	1	509	344753
RespPr_MoveS1_150	13	64	rechts	weiblich	98	1	rel	links	List4	links.bmp	1	1	346337	1	472	346809
RespPr_MoveS1_150	13	64	rechts	weiblich	99	3	rel	rechts	List4	rechts.bmp	1	3	348390	3	396	348786
RespPr_MoveS1_150	13	64	rechts	weiblich	100	1	neuInnen	neutralInnen	List4	links.bmp	1	1	350362	1	471	350833
RespPr_MoveS1_150	13	64	rechts	weiblich	101	3	rel	rechts	List4	rechts.bmp	1	3	352415	3	418	352833
RespPr_MoveS1_150	13	64	rechts	weiblich	102	1	unrel	rechts	List4	links.bmp	1	1	354414	1	539	354953
RespPr_MoveS1_150	13	64	rechts	weiblich	103	1	unrel	rechts	List4	links.bmp	1	1	356534	1	507	357041
RespPr_MoveS1_150	13	64	rechts	weiblich	104	1	neuInnen	neutralInnen	List4	links.bmp	1	1	358626	1	551	359177
RespPr_MoveS1_150	13	64	rechts	weiblich	105	3	unrel	links	List4	rechts.bmp	1	3	360759	3	483	361242
RespPr_MoveS1_150	13	64	rechts	weiblich	106	3	rel	rechts	List4	rechts.bmp	1	3	362825	3	489	363314
RespPr_MoveS1_150	13	64	rechts	weiblich	107	3	unrel	links	List4	rechts.bmp	1	3	364891	3	494	365385
RespPr_MoveS1_150	13	64	rechts	weiblich	108	1	unrel	rechts	List4	links.bmp	1	1	366957	1	604	367561
RespPr_MoveS1_150	13	64	rechts	weiblich	109	3	neuAussen	neutralAussen	List4	rechts.bmp	1	3	369143	3	555	369698
RespPr_MoveS1_150	13	64	rechts	weiblich	110	3	neuAussen	neutralAussen	List4	rechts.bmp	1	3	371275	3	511	371786
RespPr_MoveS1_150	13	64	rechts	weiblich	111	3	neuAussen	neutralAussen	List4	rechts.bmp	1	3	373355	3	495	373850
RespPr_MoveS1_150	13	64	rechts	weiblich	112	1	neuInnen	neutralInnen	List4	links.bmp	1	1	375434	1	463	375897
RespPr_MoveS1_150	13	64	rechts	weiblich	113	3	unrel	links	List4	rechts.bmp	1	3	377487	3	458	377945
RespPr_MoveS1_150	13	64	rechts	weiblich	114	1	unrel	rechts	List4	links.bmp	1	1	379526	1	499	380025
RespPr_MoveS1_150	13	64	rechts	weiblich	115	3	neuInnen	neutralInnen	List4	rechts.bmp	1	3	381605	3	428	382033
RespPr_MoveS1_150	13	64	rechts	weiblich	116	1	neuAussen	neutralAussen	List4	links.bmp	1	1	383618	1	472	384090
RespPr_MoveS1_150	13	64	rechts	weiblich	117	1	unrel	rechts	List4	links.bmp	1	1	385671	1	507	386178
RespPr_MoveS1_150	13	64	rechts	weiblich	118	1	neuAussen	neutralAussen	List4	links.bmp	1	1	387763	1	479	388242
RespPr_MoveS1_150	13	64	rechts	weiblich	119	3	unrel	links	List4	rechts.bmp	1	3	389829	3	492	390321
RespPr_MoveS1_150	13	64	rechts	weiblich	120	3	unrel	links	List4	rechts.bmp	1	3	391909	3	493	392402
RespPr_MoveS1_150	13	64	rechts	weiblich	121	1	rel	links	List5	links.bmp	1	1	399813	1	604	400417
RespPr_MoveS1_150	13	64	rechts	weiblich	122	3	rel	rechts	List5	rechts.bmp	1	3	401999	3	482	402481
RespPr_MoveS1_150	13	64	rechts	weiblich	123	3	rel	rechts	List5	rechts.bmp	1	3	404064	3	425	404489
RespPr_MoveS1_150	13	64	rechts	weiblich	124	3	unrel	links	List5	rechts.bmp	1	3	406077	3	452	406529
RespPr_MoveS1_150	13	64	rechts	weiblich	125	1	rel	links	List5	links.bmp	1	1	408116	1	469	408585
RespPr_MoveS1_150	13	64	rechts	weiblich	126	1	unrel	rechts	List5	links.bmp	1	1	410169	1	529	410698
RespPr_MoveS1_150	13	64	rechts	weiblich	127	3	neuInnen	neutralInnen	List5	rechts.bmp	1	3	412262	3	516	412778
RespPr_MoveS1_150	13	64	rechts	weiblich	128	1	rel	links	List5	links.bmp	1	1	414354	1	464	414818
RespPr_MoveS1_150	13	64	rechts	weiblich	129	3	neuInnen	neutralInnen	List5	rechts.bmp	1	3	416394	3	487	416881
RespPr_MoveS1_150	13	64	rechts	weiblich	130	1	neuInnen	neutralInnen	List5	links.bmp	1	1	418460	1	485	418945
RespPr_MoveS1_150	13	64	rechts	weiblich	131	3	unrel	links	List5	rechts.bmp	1	3	420526	3	412	420938
RespPr_MoveS1_150	13	64	rechts	weiblich	132	1	neuAussen	neutralAussen	List5	links.bmp	1	1	422512	1	434	422946
RespPr_MoveS1_150	13	64	rechts	weiblich	133	3	neuAussen	neutralAussen	List5	rechts.bmp	1	3	424524	3	445	424969
RespPr_MoveS1_150	13	64	rechts	weiblich	134	3	unrel	links	List5	rechts.bmp	1	3	426550	3	483	427033
RespPr_MoveS1_150	13	64	rechts	weiblich	135	1	neuInnen	neutralInnen	List5	links.bmp	1	1	428616	1	441	429057
RespPr_MoveS1_150	13	64	rechts	weiblich	136	1	rel	links	List5	links.bmp	1	1	430642	1	512	431154
RespPr_MoveS1_150	13	64	rechts	weiblich	137	3	neuAussen	neutralAussen	List5	rechts.bmp	1	3	432722	3	415	433137
RespPr_MoveS1_150	13	64	rechts	weiblich	138	1	neuAussen	neutralAussen	List5	links.bmp	1	1	434708	1	477	435185
RespPr_MoveS1_150	13	64	rechts	weiblich	139	3	rel	rechts	List5	rechts.bmp	1	3	436774	3	340	437114
RespPr_MoveS1_150	13	64	rechts	weiblich	140	1	unrel	rechts	List5	links.bmp	1	1	438680	1	482	439162
RespPr_MoveS1_150	13	64	rechts	weiblich	141	3	unrel	links	List5	rechts.bmp	1	3	440746	3	416	441162
RespPr_MoveS1_150	13	64	rechts	weiblich	142	1	rel	links	List5	links.bmp	1	1	442732	1	525	443257
RespPr_MoveS1_150	13	64	rechts	weiblich	143	1	unrel	rechts	List5	links.bmp	1	1	444838	1	636	445474
RespPr_MoveS1_150	13	64	rechts	weiblich	144	1	unrel	rechts	List5	links.bmp	1	1	447050	1	584	447634
RespPr_MoveS1_150	13	64	rechts	weiblich	145	3	unrel	links	List5	rechts.bmp	1	3	449223	3	579	449802
RespPr_MoveS1_150	13	64	rechts	weiblich	146	1	unrel	rechts	List5	links.bmp	1	1	451382	1	627	452009
RespPr_MoveS1_150	13	64	rechts	weiblich	147	1	neuInnen	neutralInnen	List5	links.bmp	1	1	453595	1	502	454097
RespPr_MoveS1_150	13	64	rechts	weiblich	148	1	neuAussen	neutralAussen	List5	links.bmp	1	1	455661	1	548	456209
RespPr_MoveS1_150	13	64	rechts	weiblich	149	1	unrel	rechts	List5	links.bmp	1	1	457793	1	505	458298
RespPr_MoveS1_150	13	64	rechts	weiblich	150	1	rel	links	List5	links.bmp	1	1	459873	1	528	460401
RespPr_MoveS1_150	13	64	rechts	weiblich	151	3	neuInnen	neutralInnen	List5	rechts.bmp	1	3	461979	3	478	462457
RespPr_MoveS1_150	13	64	rechts	weiblich	152	3	neuAussen	neutralAussen	List5	rechts.bmp	1	3	464045	3	524	464569
RespPr_MoveS1_150	13	64	rechts	weiblich	153	3	rel	rechts	List5	rechts.bmp	1	3	466151	3	450	466601
RespPr_MoveS1_150	13	64	rechts	weiblich	154	3	unrel	links	List5	rechts.bmp	1	3	468190	3	492	468682
RespPr_MoveS1_150	13	64	rechts	weiblich	155	3	rel	rechts	List5	rechts.bmp	1	3	470269	3	460	470729
RespPr_MoveS1_150	13	64	rechts	weiblich	156	3	rel	rechts	List5	rechts.bmp	1	3	472309	3	412	472721
RespPr_MoveS1_150	14	67	rechts	maennlich	1	3	rel	rechts	List1	rechts.bmp	1	3	207146	3	660	207806
RespPr_MoveS1_150	14	67	rechts	maennlich	2	3	neuAussen	neutralAussen	List1	rechts.bmp	1	3	209385	3	485	209870
RespPr_MoveS1_150	14	67	rechts	maennlich	3	1	unrel	rechts	List1	links.bmp	1	1	211451	1	475	211926
RespPr_MoveS1_150	14	67	rechts	maennlich	4	3	neuInnen	neutralInnen	List1	rechts.bmp	1	3	213504	3	390	213894
RespPr_MoveS1_150	14	67	rechts	maennlich	5	3	rel	rechts	List1	rechts.bmp	1	3	215476	3	371	215847
RespPr_MoveS1_150	14	67	rechts	maennlich	6	1	rel	links	List1	links.bmp	1	1	217436	1	338	217774
RespPr_MoveS1_150	14	67	rechts	maennlich	7	1	rel	links	List1	links.bmp	1	1	219342	1	344	219686
RespPr_MoveS1_150	14	67	rechts	maennlich	8	1	neuInnen	neutralInnen	List1	links.bmp	1	1	221274	1	404	221678
RespPr_MoveS1_150	14	67	rechts	maennlich	9	3	unrel	links	List1	rechts.bmp	0	3	223260	1	314	223574
RespPr_MoveS1_150	14	67	rechts	maennlich	10	1	unrel	rechts	List1	links.bmp	1	1	225140	1	499	225639
RespPr_MoveS1_150	14	67	rechts	maennlich	11	3	unrel	links	List1	rechts.bmp	1	3	227206	3	312	227518
RespPr_MoveS1_150	14	67	rechts	maennlich	12	1	neuAussen	neutralAussen	List1	links.bmp	1	1	229098	1	356	229454
RespPr_MoveS1_150	14	67	rechts	maennlich	13	3	unrel	links	List2	rechts.bmp	1	3	249292	3	410	249702
RespPr_MoveS1_150	14	67	rechts	maennlich	14	3	neuAussen	neutralAussen	List2	rechts.bmp	1	3	251278	3	384	251662
RespPr_MoveS1_150	14	67	rechts	maennlich	15	3	neuInnen	neutralInnen	List2	rechts.bmp	1	3	253250	3	349	253599
RespPr_MoveS1_150	14	67	rechts	maennlich	16	1	rel	links	List2	links.bmp	1	1	255183	1	384	255567
RespPr_MoveS1_150	14	67	rechts	maennlich	17	3	unrel	links	List2	rechts.bmp	1	3	257156	3	362	257518
RespPr_MoveS1_150	14	67	rechts	maennlich	18	1	neuAussen	neutralAussen	List2	links.bmp	1	1	259102	1	624	259726
RespPr_MoveS1_150	14	67	rechts	maennlich	19	1	rel	links	List2	links.bmp	1	1	261314	1	452	261766
RespPr_MoveS1_150	14	67	rechts	maennlich	20	3	neuInnen	neutralInnen	List2	rechts.bmp	1	3	263354	3	268	263622
RespPr_MoveS1_150	14	67	rechts	maennlich	21	1	neuAussen	neutralAussen	List2	links.bmp	1	1	265207	1	383	265590
RespPr_MoveS1_150	14	67	rechts	maennlich	22	1	unrel	rechts	List2	links.bmp	1	1	267166	1	529	267695
RespPr_MoveS1_150	14	67	rechts	maennlich	23	3	unrel	links	List2	rechts.bmp	1	3	269272	3	366	269638
RespPr_MoveS1_150	14	67	rechts	maennlich	24	1	unrel	rechts	List2	links.bmp	1	1	271218	1	364	271582
RespPr_MoveS1_150	14	67	rechts	maennlich	25	3	rel	rechts	List2	rechts.bmp	1	3	273164	3	323	273487
RespPr_MoveS1_150	14	67	rechts	maennlich	26	1	unrel	rechts	List2	links.bmp	1	1	275070	1	368	275438
RespPr_MoveS1_150	14	67	rechts	maennlich	27	1	neuInnen	neutralInnen	List2	links.bmp	1	1	277016	1	327	277343
RespPr_MoveS1_150	14	67	rechts	maennlich	28	1	rel	links	List2	links.bmp	1	1	278922	1	389	279311
RespPr_MoveS1_150	14	67	rechts	maennlich	29	3	rel	rechts	List2	rechts.bmp	1	3	280895	3	303	281198
RespPr_MoveS1_150	14	67	rechts	maennlich	30	1	unrel	rechts	List2	links.bmp	1	1	282761	1	381	283142
RespPr_MoveS1_150	14	67	rechts	maennlich	31	3	unrel	links	List2	rechts.bmp	1	3	284707	3	459	285166
RespPr_MoveS1_150	14	67	rechts	maennlich	32	3	rel	rechts	List2	rechts.bmp	1	3	286733	3	401	287134
RespPr_MoveS1_150	14	67	rechts	maennlich	33	3	rel	rechts	List2	rechts.bmp	1	3	288719	3	375	289094
RespPr_MoveS1_150	14	67	rechts	maennlich	34	1	unrel	rechts	List2	links.bmp	1	1	290665	1	589	291254
RespPr_MoveS1_150	14	67	rechts	maennlich	35	3	neuAussen	neutralAussen	List2	rechts.bmp	1	3	292837	3	369	293206
RespPr_MoveS1_150	14	67	rechts	maennlich	36	3	rel	rechts	List2	rechts.bmp	1	3	294783	3	408	295191
RespPr_MoveS1_150	14	67	rechts	maennlich	37	3	unrel	links	List2	rechts.bmp	1	3	296769	3	326	297095
RespPr_MoveS1_150	14	67	rechts	maennlich	38	3	unrel	links	List2	rechts.bmp	1	3	298675	3	315	298990
RespPr_MoveS1_150	14	67	rechts	maennlich	39	1	unrel	rechts	List2	links.bmp	1	1	300568	1	382	300950
RespPr_MoveS1_150	14	67	rechts	maennlich	40	1	rel	links	List2	links.bmp	1	1	302528	1	462	302990
RespPr_MoveS1_150	14	67	rechts	maennlich	41	1	rel	links	List2	links.bmp	1	1	304567	1	455	305022
RespPr_MoveS1_150	14	67	rechts	maennlich	42	1	neuAussen	neutralAussen	List2	links.bmp	1	1	306606	1	337	306943
RespPr_MoveS1_150	14	67	rechts	maennlich	43	1	neuInnen	neutralInnen	List2	links.bmp	1	1	308526	1	312	308838
RespPr_MoveS1_150	14	67	rechts	maennlich	44	1	rel	links	List2	links.bmp	1	1	310418	1	356	310774
RespPr_MoveS1_150	14	67	rechts	maennlich	45	3	rel	rechts	List2	rechts.bmp	1	3	312351	3	535	312886
RespPr_MoveS1_150	14	67	rechts	maennlich	46	3	neuInnen	neutralInnen	List2	rechts.bmp	1	3	314470	3	361	314831
RespPr_MoveS1_150	14	67	rechts	maennlich	47	3	neuAussen	neutralAussen	List2	rechts.bmp	1	3	316416	3	399	316815
RespPr_MoveS1_150	14	67	rechts	maennlich	48	1	neuInnen	neutralInnen	List2	links.bmp	1	1	318402	1	469	318871
RespPr_MoveS1_150	14	67	rechts	maennlich	49	3	neuAussen	neutralAussen	List3	rechts.bmp	1	3	407439	3	471	407910
RespPr_MoveS1_150	14	67	rechts	maennlich	50	1	rel	links	List3	links.bmp	1	1	409492	1	395	409887
RespPr_MoveS1_150	14	67	rechts	maennlich	51	3	rel	rechts	List3	rechts.bmp	1	3	411465	3	373	411838
RespPr_MoveS1_150	14	67	rechts	maennlich	52	3	rel	rechts	List3	rechts.bmp	1	3	413424	3	342	413766
RespPr_MoveS1_150	14	67	rechts	maennlich	53	3	neuAussen	neutralAussen	List3	rechts.bmp	1	3	415344	3	326	415670
RespPr_MoveS1_150	14	67	rechts	maennlich	54	1	unrel	rechts	List3	links.bmp	1	1	417250	1	452	417702
RespPr_MoveS1_150	14	67	rechts	maennlich	55	3	rel	rechts	List3	rechts.bmp	1	3	419289	3	333	419622
RespPr_MoveS1_150	14	67	rechts	maennlich	56	1	neuInnen	neutralInnen	List3	links.bmp	1	1	421208	1	382	421590
RespPr_MoveS1_150	14	67	rechts	maennlich	57	1	unrel	rechts	List3	links.bmp	1	1	423168	1	398	423566
RespPr_MoveS1_150	14	67	rechts	maennlich	58	1	unrel	rechts	List3	links.bmp	1	1	425154	1	372	425526
RespPr_MoveS1_150	14	67	rechts	maennlich	59	1	unrel	rechts	List3	links.bmp	1	1	427113	1	373	427486
RespPr_MoveS1_150	14	67	rechts	maennlich	60	1	neuAussen	neutralAussen	List3	links.bmp	1	1	429072	1	326	429398
RespPr_MoveS1_150	14	67	rechts	maennlich	61	3	rel	rechts	List3	rechts.bmp	1	3	430978	3	340	431318
RespPr_MoveS1_150	14	67	rechts	maennlich	62	3	unrel	links	List3	rechts.bmp	1	3	432898	3	436	433334
RespPr_MoveS1_150	14	67	rechts	maennlich	63	3	neuAussen	neutralAussen	List3	rechts.bmp	1	3	434910	3	312	435222
RespPr_MoveS1_150	14	67	rechts	maennlich	64	1	unrel	rechts	List3	links.bmp	1	1	436790	1	376	437166
RespPr_MoveS1_150	14	67	rechts	maennlich	65	1	unrel	rechts	List3	links.bmp	1	1	438749	1	369	439118
RespPr_MoveS1_150	14	67	rechts	maennlich	66	3	unrel	links	List3	rechts.bmp	1	3	440695	3	416	441111
RespPr_MoveS1_150	14	67	rechts	maennlich	67	3	rel	rechts	List3	rechts.bmp	1	3	442694	3	368	443062
RespPr_MoveS1_150	14	67	rechts	maennlich	68	1	rel	links	List3	links.bmp	1	1	444641	1	421	445062
RespPr_MoveS1_150	14	67	rechts	maennlich	69	1	rel	links	List3	links.bmp	1	1	446640	1	382	447022
RespPr_MoveS1_150	14	67	rechts	maennlich	70	1	neuAussen	neutralAussen	List3	links.bmp	1	1	448599	1	391	448990
RespPr_MoveS1_150	14	67	rechts	maennlich	71	3	rel	rechts	List3	rechts.bmp	1	3	450572	3	402	450974
RespPr_MoveS1_150	14	67	rechts	maennlich	72	3	neuInnen	neutralInnen	List3	rechts.bmp	1	3	452558	3	360	452918
RespPr_MoveS1_150	14	67	rechts	maennlich	73	1	neuInnen	neutralInnen	List3	links.bmp	1	1	454504	1	454	454958
RespPr_MoveS1_150	14	67	rechts	maennlich	74	3	unrel	links	List3	rechts.bmp	1	3	456543	3	367	456910
RespPr_MoveS1_150	14	67	rechts	maennlich	75	3	unrel	links	List3	rechts.bmp	1	3	458489	3	342	458831
RespPr_MoveS1_150	14	67	rechts	maennlich	76	3	unrel	links	List3	rechts.bmp	1	3	460409	3	333	460742
RespPr_MoveS1_150	14	67	rechts	maennlich	77	1	neuInnen	neutralInnen	List3	links.bmp	1	1	462315	1	395	462710
RespPr_MoveS1_150	14	67	rechts	maennlich	78	1	rel	links	List3	links.bmp	1	1	464287	1	399	464686
RespPr_MoveS1_150	14	67	rechts	maennlich	79	1	rel	links	List3	links.bmp	1	1	466273	1	381	466654
RespPr_MoveS1_150	14	67	rechts	maennlich	80	3	neuInnen	neutralInnen	List3	rechts.bmp	1	3	468233	3	469	468702
RespPr_MoveS1_150	14	67	rechts	maennlich	81	3	neuInnen	neutralInnen	List3	rechts.bmp	1	3	470285	3	329	470614
RespPr_MoveS1_150	14	67	rechts	maennlich	82	1	rel	links	List3	links.bmp	1	1	472191	1	391	472582
RespPr_MoveS1_150	14	67	rechts	maennlich	83	1	neuAussen	neutralAussen	List3	links.bmp	1	1	474151	1	400	474551
RespPr_MoveS1_150	14	67	rechts	maennlich	84	3	unrel	links	List3	rechts.bmp	1	3	476137	3	453	476590
RespPr_MoveS1_150	14	67	rechts	maennlich	85	3	rel	rechts	List4	rechts.bmp	1	3	495224	3	446	495670
RespPr_MoveS1_150	14	67	rechts	maennlich	86	1	rel	links	List4	links.bmp	1	1	497250	1	444	497694
RespPr_MoveS1_150	14	67	rechts	maennlich	87	3	unrel	links	List4	rechts.bmp	1	3	499276	3	346	499622
RespPr_MoveS1_150	14	67	rechts	maennlich	88	1	neuInnen	neutralInnen	List4	links.bmp	1	1	501208	1	318	501526
RespPr_MoveS1_150	14	67	rechts	maennlich	89	3	unrel	links	List4	rechts.bmp	1	3	503115	3	307	503422
RespPr_MoveS1_150	14	67	rechts	maennlich	90	1	neuInnen	neutralInnen	List4	links.bmp	1	1	505007	1	319	505326
RespPr_MoveS1_150	14	67	rechts	maennlich	91	3	rel	rechts	List4	rechts.bmp	1	3	506913	3	294	507207
RespPr_MoveS1_150	14	67	rechts	maennlich	92	3	unrel	links	List4	rechts.bmp	1	3	508793	3	445	509238
RespPr_MoveS1_150	14	67	rechts	maennlich	93	1	rel	links	List4	links.bmp	1	1	510819	1	404	511223
RespPr_MoveS1_150	14	67	rechts	maennlich	94	3	neuInnen	neutralInnen	List4	rechts.bmp	1	3	512805	3	329	513134
RespPr_MoveS1_150	14	67	rechts	maennlich	95	3	neuInnen	neutralInnen	List4	rechts.bmp	1	3	514711	3	479	515190
RespPr_MoveS1_150	14	67	rechts	maennlich	96	1	unrel	rechts	List4	links.bmp	1	1	516777	1	461	517238
RespPr_MoveS1_150	14	67	rechts	maennlich	97	3	rel	rechts	List4	rechts.bmp	1	3	518803	3	316	519119
RespPr_MoveS1_150	14	67	rechts	maennlich	98	3	rel	rechts	List4	rechts.bmp	1	3	520695	3	376	521071
RespPr_MoveS1_150	14	67	rechts	maennlich	99	3	unrel	links	List4	rechts.bmp	1	3	522655	3	343	522998
RespPr_MoveS1_150	14	67	rechts	maennlich	100	1	neuInnen	neutralInnen	List4	links.bmp	1	1	524587	1	459	525046
RespPr_MoveS1_150	14	67	rechts	maennlich	101	1	unrel	rechts	List4	links.bmp	1	1	526627	1	428	527055
RespPr_MoveS1_150	14	67	rechts	maennlich	102	3	unrel	links	List4	rechts.bmp	1	3	528639	3	463	529102
RespPr_MoveS1_150	14	67	rechts	maennlich	103	1	unrel	rechts	List4	links.bmp	1	1	530679	1	423	531102
RespPr_MoveS1_150	14	67	rechts	maennlich	104	3	neuAussen	neutralAussen	List4	rechts.bmp	1	3	532665	3	421	533086
RespPr_MoveS1_150	14	67	rechts	maennlich	105	3	neuAussen	neutralAussen	List4	rechts.bmp	1	3	534651	3	428	535079
RespPr_MoveS1_150	14	67	rechts	maennlich	106	1	unrel	rechts	List4	links.bmp	1	1	536663	1	423	537086
RespPr_MoveS1_150	14	67	rechts	maennlich	107	3	unrel	links	List4	rechts.bmp	1	3	538663	3	319	538982
RespPr_MoveS1_150	14	67	rechts	maennlich	108	1	rel	links	List4	links.bmp	1	1	540569	1	390	540959
RespPr_MoveS1_150	14	67	rechts	maennlich	109	1	rel	links	List4	links.bmp	1	1	542541	1	441	542982
RespPr_MoveS1_150	14	67	rechts	maennlich	110	1	neuAussen	neutralAussen	List4	links.bmp	1	1	544567	1	360	544927
RespPr_MoveS1_150	14	67	rechts	maennlich	111	3	neuAussen	neutralAussen	List4	rechts.bmp	1	3	546513	3	341	546854
RespPr_MoveS1_150	14	67	rechts	maennlich	112	1	unrel	rechts	List4	links.bmp	1	1	548433	1	365	548798
RespPr_MoveS1_150	14	67	rechts	maennlich	113	1	neuAussen	neutralAussen	List4	links.bmp	1	1	550379	1	403	550782
RespPr_MoveS1_150	14	67	rechts	maennlich	114	1	neuAussen	neutralAussen	List4	links.bmp	1	1	552365	1	345	552710
RespPr_MoveS1_150	14	67	rechts	maennlich	115	3	neuInnen	neutralInnen	List4	rechts.bmp	1	3	554298	3	428	554726
RespPr_MoveS1_150	14	67	rechts	maennlich	116	1	unrel	rechts	List4	links.bmp	1	1	556310	1	401	556711
RespPr_MoveS1_150	14	67	rechts	maennlich	117	1	rel	links	List4	links.bmp	1	1	558296	1	383	558679
RespPr_MoveS1_150	14	67	rechts	maennlich	118	3	rel	rechts	List4	rechts.bmp	1	3	560256	3	414	560670
RespPr_MoveS1_150	14	67	rechts	maennlich	119	3	rel	rechts	List4	rechts.bmp	1	3	562255	3	415	562670
RespPr_MoveS1_150	14	67	rechts	maennlich	120	1	rel	links	List4	links.bmp	1	1	564254	1	424	564678
RespPr_MoveS1_150	14	67	rechts	maennlich	121	3	neuInnen	neutralInnen	List5	rechts.bmp	1	3	653238	3	417	653655
RespPr_MoveS1_150	14	67	rechts	maennlich	122	3	neuAussen	neutralAussen	List5	rechts.bmp	1	3	655238	3	344	655582
RespPr_MoveS1_150	14	67	rechts	maennlich	123	1	unrel	rechts	List5	links.bmp	1	1	657170	1	428	657598
RespPr_MoveS1_150	14	67	rechts	maennlich	124	1	neuInnen	neutralInnen	List5	links.bmp	1	1	659183	1	392	659575
RespPr_MoveS1_150	14	67	rechts	maennlich	125	3	rel	rechts	List5	rechts.bmp	0	3	661156	1	330	661486
RespPr_MoveS1_150	14	67	rechts	maennlich	126	3	neuInnen	neutralInnen	List5	rechts.bmp	1	3	663075	3	444	663519
RespPr_MoveS1_150	14	67	rechts	maennlich	127	1	rel	links	List5	links.bmp	1	1	665101	1	521	665622
RespPr_MoveS1_150	14	67	rechts	maennlich	128	3	neuInnen	neutralInnen	List5	rechts.bmp	1	3	667207	3	391	667598
RespPr_MoveS1_150	14	67	rechts	maennlich	129	1	unrel	rechts	List5	links.bmp	1	1	669180	1	370	669550
RespPr_MoveS1_150	14	67	rechts	maennlich	130	1	rel	links	List5	links.bmp	1	1	671126	1	456	671582
RespPr_MoveS1_150	14	67	rechts	maennlich	131	3	rel	rechts	List5	rechts.bmp	1	3	673165	3	497	673662
RespPr_MoveS1_150	14	67	rechts	maennlich	132	1	neuAussen	neutralAussen	List5	links.bmp	1	1	675244	1	378	675622
RespPr_MoveS1_150	14	67	rechts	maennlich	133	3	neuAussen	neutralAussen	List5	rechts.bmp	1	3	677204	3	362	677566
RespPr_MoveS1_150	14	67	rechts	maennlich	134	1	rel	links	List5	links.bmp	1	1	679150	1	441	679591
RespPr_MoveS1_150	14	67	rechts	maennlich	135	1	neuInnen	neutralInnen	List5	links.bmp	1	1	681176	1	407	681583
RespPr_MoveS1_150	14	67	rechts	maennlich	136	3	rel	rechts	List5	rechts.bmp	1	3	683162	3	396	683558
RespPr_MoveS1_150	14	67	rechts	maennlich	137	3	neuAussen	neutralAussen	List5	rechts.bmp	1	3	685134	3	472	685606
RespPr_MoveS1_150	14	67	rechts	maennlich	138	1	unrel	rechts	List5	links.bmp	1	1	687187	1	443	687630
RespPr_MoveS1_150	14	67	rechts	maennlich	139	1	rel	links	List5	links.bmp	1	1	689213	1	537	689750
RespPr_MoveS1_150	14	67	rechts	maennlich	140	1	neuAussen	neutralAussen	List5	links.bmp	1	1	691332	1	498	691830
RespPr_MoveS1_150	14	67	rechts	maennlich	141	3	unrel	links	List5	rechts.bmp	1	3	693412	3	474	693886
RespPr_MoveS1_150	14	67	rechts	maennlich	142	3	rel	rechts	List5	rechts.bmp	1	3	695464	3	446	695910
RespPr_MoveS1_150	14	67	rechts	maennlich	143	1	unrel	rechts	List5	links.bmp	1	1	697490	1	516	698006
RespPr_MoveS1_150	14	67	rechts	maennlich	144	3	unrel	links	List5	rechts.bmp	1	3	699583	3	407	699990
RespPr_MoveS1_150	14	67	rechts	maennlich	145	3	unrel	links	List5	rechts.bmp	1	3	701569	3	398	701967
RespPr_MoveS1_150	14	67	rechts	maennlich	146	3	rel	rechts	List5	rechts.bmp	1	3	703555	3	395	703950
RespPr_MoveS1_150	14	67	rechts	maennlich	147	3	unrel	links	List5	rechts.bmp	1	3	705528	3	446	705974
RespPr_MoveS1_150	14	67	rechts	maennlich	148	3	unrel	links	List5	rechts.bmp	1	3	707554	3	396	707950
RespPr_MoveS1_150	14	67	rechts	maennlich	149	1	rel	links	List5	links.bmp	1	1	709526	1	552	710078
RespPr_MoveS1_150	14	67	rechts	maennlich	150	1	unrel	rechts	List5	links.bmp	1	1	711659	1	507	712166
RespPr_MoveS1_150	14	67	rechts	maennlich	151	1	neuAussen	neutralAussen	List5	links.bmp	1	1	713752	1	646	714398
RespPr_MoveS1_150	14	67	rechts	maennlich	152	1	unrel	rechts	List5	links.bmp	1	1	715977	1	486	716463
RespPr_MoveS1_150	14	67	rechts	maennlich	153	1	rel	links	List5	links.bmp	1	1	718043	1	403	718446
RespPr_MoveS1_150	14	67	rechts	maennlich	154	1	neuInnen	neutralInnen	List5	links.bmp	1	1	720029	1	409	720438
RespPr_MoveS1_150	14	67	rechts	maennlich	155	3	rel	rechts	List5	rechts.bmp	1	3	722015	3	455	722470
RespPr_MoveS1_150	14	67	rechts	maennlich	156	3	unrel	links	List5	rechts.bmp	1	3	724055	3	407	724462
RespPr_MoveS1_150	15	61	rechts	weiblich	1	3	rel	rechts	List1	rechts.bmp	1	3	80257	3	637	80894
RespPr_MoveS1_150	15	61	rechts	weiblich	2	1	rel	links	List1	links.bmp	1	1	82470	1	496	82966
RespPr_MoveS1_150	15	61	rechts	weiblich	3	1	unrel	rechts	List1	links.bmp	1	1	84536	1	550	85086
RespPr_MoveS1_150	15	61	rechts	weiblich	4	3	unrel	links	List1	rechts.bmp	1	3	86668	3	473	87141
RespPr_MoveS1_150	15	61	rechts	weiblich	5	1	neuInnen	neutralInnen	List1	links.bmp	1	1	88721	1	436	89157
RespPr_MoveS1_150	15	61	rechts	weiblich	6	3	neuInnen	neutralInnen	List1	rechts.bmp	1	3	90734	3	408	91142
RespPr_MoveS1_150	15	61	rechts	weiblich	7	1	rel	links	List1	links.bmp	1	1	92720	1	398	93118
RespPr_MoveS1_150	15	61	rechts	weiblich	8	3	neuAussen	neutralAussen	List1	rechts.bmp	1	3	94706	3	332	95038
RespPr_MoveS1_150	15	61	rechts	weiblich	9	3	rel	rechts	List1	rechts.bmp	1	3	96612	3	666	97278
RespPr_MoveS1_150	15	61	rechts	weiblich	10	1	unrel	rechts	List1	links.bmp	1	1	98864	1	414	99278
RespPr_MoveS1_150	15	61	rechts	weiblich	11	1	neuAussen	neutralAussen	List1	links.bmp	1	1	100864	1	509	101373
RespPr_MoveS1_150	15	61	rechts	weiblich	12	3	unrel	links	List1	rechts.bmp	1	3	102956	3	482	103438
RespPr_MoveS1_150	15	61	rechts	weiblich	13	1	unrel	rechts	List2	links.bmp	1	1	118418	1	603	119021
RespPr_MoveS1_150	15	61	rechts	weiblich	14	1	rel	links	List2	links.bmp	1	1	120604	1	498	121102
RespPr_MoveS1_150	15	61	rechts	weiblich	15	1	unrel	rechts	List2	links.bmp	1	1	122670	1	560	123230
RespPr_MoveS1_150	15	61	rechts	weiblich	16	1	unrel	rechts	List2	links.bmp	1	1	124816	1	462	125278
RespPr_MoveS1_150	15	61	rechts	weiblich	17	3	neuInnen	neutralInnen	List2	rechts.bmp	1	3	126842	3	411	127253
RespPr_MoveS1_150	15	61	rechts	weiblich	18	1	rel	links	List2	links.bmp	1	1	128828	1	361	129189
RespPr_MoveS1_150	15	61	rechts	weiblich	19	1	neuAussen	neutralAussen	List2	links.bmp	1	1	130774	1	376	131150
RespPr_MoveS1_150	15	61	rechts	weiblich	20	3	rel	rechts	List2	rechts.bmp	1	3	132720	3	302	133022
RespPr_MoveS1_150	15	61	rechts	weiblich	21	3	unrel	links	List2	rechts.bmp	1	3	134586	3	459	135045
RespPr_MoveS1_150	15	61	rechts	weiblich	22	1	unrel	rechts	List2	links.bmp	1	1	136612	1	538	137150
RespPr_MoveS1_150	15	61	rechts	weiblich	23	1	neuInnen	neutralInnen	List2	links.bmp	1	1	138718	1	383	139101
RespPr_MoveS1_150	15	61	rechts	weiblich	24	1	neuInnen	neutralInnen	List2	links.bmp	1	1	140690	1	412	141102
RespPr_MoveS1_150	15	61	rechts	weiblich	25	3	unrel	links	List2	rechts.bmp	1	3	142690	3	404	143094
RespPr_MoveS1_150	15	61	rechts	weiblich	26	3	unrel	links	List2	rechts.bmp	1	3	144676	3	314	144990
RespPr_MoveS1_150	15	61	rechts	weiblich	27	3	rel	rechts	List2	rechts.bmp	1	3	146568	3	382	146950
RespPr_MoveS1_150	15	61	rechts	weiblich	28	3	neuAussen	neutralAussen	List2	rechts.bmp	1	3	148528	3	318	148846
RespPr_MoveS1_150	15	61	rechts	weiblich	29	1	rel	links	List2	links.bmp	1	1	150434	1	444	150878
RespPr_MoveS1_150	15	61	rechts	weiblich	30	3	rel	rechts	List2	rechts.bmp	1	3	152460	3	282	152742
RespPr_MoveS1_150	15	61	rechts	weiblich	31	1	neuInnen	neutralInnen	List2	links.bmp	1	1	154326	1	487	154813
RespPr_MoveS1_150	15	61	rechts	weiblich	32	3	rel	rechts	List2	rechts.bmp	1	3	156392	3	286	156678
RespPr_MoveS1_150	15	61	rechts	weiblich	33	3	neuInnen	neutralInnen	List2	rechts.bmp	1	3	158258	3	332	158590
RespPr_MoveS1_150	15	61	rechts	weiblich	34	1	unrel	rechts	List2	links.bmp	0	1	160177	3	301	160478
RespPr_MoveS1_150	15	61	rechts	weiblich	35	3	neuAussen	neutralAussen	List2	rechts.bmp	1	3	162057	3	413	162470
RespPr_MoveS1_150	15	61	rechts	weiblich	36	1	neuAussen	neutralAussen	List2	links.bmp	1	1	164043	1	411	164454
RespPr_MoveS1_150	15	61	rechts	weiblich	37	1	neuAussen	neutralAussen	List2	links.bmp	1	1	166029	1	393	166422
RespPr_MoveS1_150	15	61	rechts	weiblich	38	1	rel	links	List2	links.bmp	1	1	168001	1	389	168390
RespPr_MoveS1_150	15	61	rechts	weiblich	39	3	neuAussen	neutralAussen	List2	rechts.bmp	1	3	169961	3	421	170382
RespPr_MoveS1_150	15	61	rechts	weiblich	40	3	neuInnen	neutralInnen	List2	rechts.bmp	1	3	171947	3	435	172382
RespPr_MoveS1_150	15	61	rechts	weiblich	41	1	rel	links	List2	links.bmp	1	1	173959	1	399	174358
RespPr_MoveS1_150	15	61	rechts	weiblich	42	1	rel	links	List2	links.bmp	1	1	175945	1	413	176358
RespPr_MoveS1_150	15	61	rechts	weiblich	43	3	rel	rechts	List2	rechts.bmp	1	3	177945	3	333	178278
RespPr_MoveS1_150	15	61	rechts	weiblich	44	3	unrel	links	List2	rechts.bmp	1	3	179864	3	430	180294
RespPr_MoveS1_150	15	61	rechts	weiblich	45	3	unrel	links	List2	rechts.bmp	1	3	181877	3	505	182382
RespPr_MoveS1_150	15	61	rechts	weiblich	46	1	unrel	rechts	List2	links.bmp	1	1	183969	1	421	184390
RespPr_MoveS1_150	15	61	rechts	weiblich	47	3	rel	rechts	List2	rechts.bmp	1	3	185969	3	309	186278
RespPr_MoveS1_150	15	61	rechts	weiblich	48	3	unrel	links	List2	rechts.bmp	1	3	187861	3	361	188222
RespPr_MoveS1_150	15	61	rechts	weiblich	49	3	neuAussen	neutralAussen	List3	rechts.bmp	1	3	192167	3	359	192526
RespPr_MoveS1_150	15	61	rechts	weiblich	50	1	neuInnen	neutralInnen	List3	links.bmp	1	1	194113	1	534	194647
RespPr_MoveS1_150	15	61	rechts	weiblich	51	3	unrel	links	List3	rechts.bmp	1	3	196219	3	307	196526
RespPr_MoveS1_150	15	61	rechts	weiblich	52	1	unrel	rechts	List3	links.bmp	1	1	198111	1	470	198581
RespPr_MoveS1_150	15	61	rechts	weiblich	53	1	rel	links	List3	links.bmp	1	1	200151	1	358	200509
RespPr_MoveS1_150	15	61	rechts	weiblich	54	1	neuInnen	neutralInnen	List3	links.bmp	1	1	202097	1	501	202598
RespPr_MoveS1_150	15	61	rechts	weiblich	55	1	rel	links	List3	links.bmp	1	1	204163	1	379	204542
RespPr_MoveS1_150	15	61	rechts	weiblich	56	1	rel	links	List3	links.bmp	1	1	206109	1	353	206462
RespPr_MoveS1_150	15	61	rechts	weiblich	57	3	rel	rechts	List3	rechts.bmp	1	3	208041	3	421	208462
RespPr_MoveS1_150	15	61	rechts	weiblich	58	3	neuAussen	neutralAussen	List3	rechts.bmp	1	3	210041	3	477	210518
RespPr_MoveS1_150	15	61	rechts	weiblich	59	1	neuAussen	neutralAussen	List3	links.bmp	1	1	212107	1	539	212646
RespPr_MoveS1_150	15	61	rechts	weiblich	60	3	rel	rechts	List3	rechts.bmp	1	3	214213	3	362	214575
RespPr_MoveS1_150	15	61	rechts	weiblich	61	1	unrel	rechts	List3	links.bmp	1	1	216159	1	463	216622
RespPr_MoveS1_150	15	61	rechts	weiblich	62	3	rel	rechts	List3	rechts.bmp	1	3	218211	3	403	218614
RespPr_MoveS1_150	15	61	rechts	weiblich	63	3	neuAussen	neutralAussen	List3	rechts.bmp	1	3	220197	3	361	220558
RespPr_MoveS1_150	15	61	rechts	weiblich	64	3	unrel	links	List3	rechts.bmp	1	3	222143	3	423	222566
RespPr_MoveS1_150	15	61	rechts	weiblich	65	3	unrel	links	List3	rechts.bmp	1	3	224143	3	335	224478
RespPr_MoveS1_150	15	61	rechts	weiblich	66	3	neuInnen	neutralInnen	List3	rechts.bmp	1	3	226062	3	312	226374
RespPr_MoveS1_150	15	61	rechts	weiblich	67	1	neuAussen	neutralAussen	List3	links.bmp	1	1	227955	1	379	228334
RespPr_MoveS1_150	15	61	rechts	weiblich	68	3	unrel	links	List3	rechts.bmp	1	3	229914	3	379	230293
RespPr_MoveS1_150	15	61	rechts	weiblich	69	1	rel	links	List3	links.bmp	1	1	231874	1	372	232246
RespPr_MoveS1_150	15	61	rechts	weiblich	70	3	neuInnen	neutralInnen	List3	rechts.bmp	1	3	233833	3	317	234150
RespPr_MoveS1_150	15	61	rechts	weiblich	71	1	unrel	rechts	List3	links.bmp	1	1	235726	1	408	236134
RespPr_MoveS1_150	15	61	rechts	weiblich	72	3	unrel	links	List3	rechts.bmp	1	3	237712	3	302	238014
RespPr_MoveS1_150	15	61	rechts	weiblich	73	3	rel	rechts	List3	rechts.bmp	1	3	239578	3	396	239974
RespPr_MoveS1_150	15	61	rechts	weiblich	74	3	rel	rechts	List3	rechts.bmp	1	3	241550	3	312	241862
RespPr_MoveS1_150	15	61	rechts	weiblich	75	3	unrel	links	List3	rechts.bmp	1	3	243430	3	328	243758
RespPr_MoveS1_150	15	61	rechts	weiblich	76	1	unrel	rechts	List3	links.bmp	1	1	245336	1	342	245678
RespPr_MoveS1_150	15	61	rechts	weiblich	77	1	neuAussen	neutralAussen	List3	links.bmp	1	1	247255	1	423	247678
RespPr_MoveS1_150	15	61	rechts	weiblich	78	1	unrel	rechts	List3	links.bmp	1	1	249255	1	439	249694
RespPr_MoveS1_150	15	61	rechts	weiblich	79	3	neuInnen	neutralInnen	List3	rechts.bmp	1	3	251281	3	325	251606
RespPr_MoveS1_150	15	61	rechts	weiblich	80	3	rel	rechts	List3	rechts.bmp	1	3	253187	3	314	253501
RespPr_MoveS1_150	15	61	rechts	weiblich	81	1	rel	links	List3	links.bmp	1	1	255079	1	319	255398
RespPr_MoveS1_150	15	61	rechts	weiblich	82	1	neuInnen	neutralInnen	List3	links.bmp	0	1	256985	3	285	257270
RespPr_MoveS1_150	15	61	rechts	weiblich	83	1	rel	links	List3	links.bmp	1	1	258851	1	395	259246
RespPr_MoveS1_150	15	61	rechts	weiblich	84	1	unrel	rechts	List3	links.bmp	1	1	260811	1	443	261254
RespPr_MoveS1_150	15	61	rechts	weiblich	85	1	unrel	rechts	List4	links.bmp	1	1	264569	1	477	265046
RespPr_MoveS1_150	15	61	rechts	weiblich	86	3	unrel	links	List4	rechts.bmp	1	3	266609	3	389	266998
RespPr_MoveS1_150	15	61	rechts	weiblich	87	3	unrel	links	List4	rechts.bmp	1	3	268581	3	377	268958
RespPr_MoveS1_150	15	61	rechts	weiblich	88	1	neuAussen	neutralAussen	List4	links.bmp	1	1	270541	1	377	270918
RespPr_MoveS1_150	15	61	rechts	weiblich	89	1	unrel	rechts	List4	links.bmp	1	1	272500	1	410	272910
RespPr_MoveS1_150	15	61	rechts	weiblich	90	3	rel	rechts	List4	rechts.bmp	1	3	274500	3	434	274934
RespPr_MoveS1_150	15	61	rechts	weiblich	91	3	unrel	links	List4	rechts.bmp	1	3	276512	3	406	276918
RespPr_MoveS1_150	15	61	rechts	weiblich	92	3	rel	rechts	List4	rechts.bmp	1	3	278498	3	428	278926
RespPr_MoveS1_150	15	61	rechts	weiblich	93	1	unrel	rechts	List4	links.bmp	1	1	280511	1	503	281014
RespPr_MoveS1_150	15	61	rechts	weiblich	94	1	rel	links	List4	links.bmp	1	1	282603	1	434	283037
RespPr_MoveS1_150	15	61	rechts	weiblich	95	3	rel	rechts	List4	rechts.bmp	1	3	284616	3	310	284926
RespPr_MoveS1_150	15	61	rechts	weiblich	96	1	unrel	rechts	List4	links.bmp	1	1	286509	1	361	286870
RespPr_MoveS1_150	15	61	rechts	weiblich	97	1	neuInnen	neutralInnen	List4	links.bmp	1	1	288455	1	375	288830
RespPr_MoveS1_150	15	61	rechts	weiblich	98	1	rel	links	List4	links.bmp	1	1	290414	1	399	290813
RespPr_MoveS1_150	15	61	rechts	weiblich	99	1	neuAussen	neutralAussen	List4	links.bmp	1	1	292400	1	373	292773
RespPr_MoveS1_150	15	61	rechts	weiblich	100	3	neuInnen	neutralInnen	List4	rechts.bmp	1	3	294360	3	462	294822
RespPr_MoveS1_150	15	61	rechts	weiblich	101	3	rel	rechts	List4	rechts.bmp	1	3	296399	3	415	296814
RespPr_MoveS1_150	15	61	rechts	weiblich	102	1	rel	links	List4	links.bmp	1	1	298398	1	392	298790
RespPr_MoveS1_150	15	61	rechts	weiblich	103	3	neuAussen	neutralAussen	List4	rechts.bmp	1	3	300371	3	435	300806
RespPr_MoveS1_150	15	61	rechts	weiblich	104	3	unrel	links	List4	rechts.bmp	1	3	302384	3	438	302822
RespPr_MoveS1_150	15	61	rechts	weiblich	105	3	unrel	links	List4	rechts.bmp	1	3	304410	3	411	304821
RespPr_MoveS1_150	15	61	rechts	weiblich	106	1	unrel	rechts	List4	links.bmp	1	1	306409	1	484	306893
RespPr_MoveS1_150	15	61	rechts	weiblich	107	3	rel	rechts	List4	rechts.bmp	1	3	308475	3	339	308814
RespPr_MoveS1_150	15	61	rechts	weiblich	108	1	rel	links	List4	links.bmp	1	1	310394	1	355	310749
RespPr_MoveS1_150	15	61	rechts	weiblich	109	1	rel	links	List4	links.bmp	1	1	312327	1	430	312757
RespPr_MoveS1_150	15	61	rechts	weiblich	110	3	neuInnen	neutralInnen	List4	rechts.bmp	1	3	314340	3	370	314710
RespPr_MoveS1_150	15	61	rechts	weiblich	111	1	neuInnen	neutralInnen	List4	links.bmp	1	1	316286	1	464	316750
RespPr_MoveS1_150	15	61	rechts	weiblich	112	3	unrel	links	List4	rechts.bmp	1	3	318338	3	412	318750
RespPr_MoveS1_150	15	61	rechts	weiblich	113	3	neuAussen	neutralAussen	List4	rechts.bmp	1	3	320338	3	419	320757
RespPr_MoveS1_150	15	61	rechts	weiblich	114	3	neuInnen	neutralInnen	List4	rechts.bmp	1	3	322324	3	377	322701
RespPr_MoveS1_150	15	61	rechts	weiblich	115	1	rel	links	List4	links.bmp	1	1	324270	1	416	324686
RespPr_MoveS1_150	15	61	rechts	weiblich	116	1	neuInnen	neutralInnen	List4	links.bmp	1	1	326256	1	430	326686
RespPr_MoveS1_150	15	61	rechts	weiblich	117	1	unrel	rechts	List4	links.bmp	1	1	328268	1	401	328669
RespPr_MoveS1_150	15	61	rechts	weiblich	118	1	neuAussen	neutralAussen	List4	links.bmp	1	1	330254	1	447	330701
RespPr_MoveS1_150	15	61	rechts	weiblich	119	3	rel	rechts	List4	rechts.bmp	1	3	332280	3	462	332742
RespPr_MoveS1_150	15	61	rechts	weiblich	120	3	neuAussen	neutralAussen	List4	rechts.bmp	1	3	334320	3	381	334701
RespPr_MoveS1_150	15	61	rechts	weiblich	121	3	unrel	links	List5	rechts.bmp	1	3	338372	3	514	338886
RespPr_MoveS1_150	15	61	rechts	weiblich	122	3	unrel	links	List5	rechts.bmp	1	3	340464	3	349	340813
RespPr_MoveS1_150	15	61	rechts	weiblich	123	3	unrel	links	List5	rechts.bmp	1	3	342384	3	350	342734
RespPr_MoveS1_150	15	61	rechts	weiblich	124	3	unrel	links	List5	rechts.bmp	1	3	344316	3	337	344653
RespPr_MoveS1_150	15	61	rechts	weiblich	125	3	unrel	links	List5	rechts.bmp	1	3	346236	3	346	346582
RespPr_MoveS1_150	15	61	rechts	weiblich	126	1	neuInnen	neutralInnen	List5	links.bmp	1	1	348168	1	342	348510
RespPr_MoveS1_150	15	61	rechts	weiblich	127	1	unrel	rechts	List5	links.bmp	1	1	350088	1	534	350622
RespPr_MoveS1_150	15	61	rechts	weiblich	128	3	rel	rechts	List5	rechts.bmp	1	3	352207	3	359	352566
RespPr_MoveS1_150	15	61	rechts	weiblich	129	3	unrel	links	List5	rechts.bmp	1	3	354153	3	453	354606
RespPr_MoveS1_150	15	61	rechts	weiblich	130	1	unrel	rechts	List5	links.bmp	1	1	356192	1	486	356678
RespPr_MoveS1_150	15	61	rechts	weiblich	131	3	neuAussen	neutralAussen	List5	rechts.bmp	1	3	358258	3	420	358678
RespPr_MoveS1_150	15	61	rechts	weiblich	132	3	rel	rechts	List5	rechts.bmp	1	3	360258	3	436	360694
RespPr_MoveS1_150	15	61	rechts	weiblich	133	1	neuAussen	neutralAussen	List5	links.bmp	1	1	362270	1	479	362749
RespPr_MoveS1_150	15	61	rechts	weiblich	134	1	neuAussen	neutralAussen	List5	links.bmp	1	1	364336	1	478	364814
RespPr_MoveS1_150	15	61	rechts	weiblich	135	3	rel	rechts	List5	rechts.bmp	1	3	366402	3	364	366766
RespPr_MoveS1_150	15	61	rechts	weiblich	136	1	unrel	rechts	List5	links.bmp	1	1	368348	1	466	368814
RespPr_MoveS1_150	15	61	rechts	weiblich	137	1	rel	links	List5	links.bmp	1	1	370401	1	429	370830
RespPr_MoveS1_150	15	61	rechts	weiblich	138	1	rel	links	List5	links.bmp	1	1	372414	1	432	372846
RespPr_MoveS1_150	15	61	rechts	weiblich	139	1	neuInnen	neutralInnen	List5	links.bmp	1	1	374426	1	387	374813
RespPr_MoveS1_150	15	61	rechts	weiblich	140	3	rel	rechts	List5	rechts.bmp	1	3	376399	3	383	376782
RespPr_MoveS1_150	15	61	rechts	weiblich	141	3	neuInnen	neutralInnen	List5	rechts.bmp	1	3	378358	3	408	378766
RespPr_MoveS1_150	15	61	rechts	weiblich	142	1	unrel	rechts	List5	links.bmp	1	1	380345	1	477	380822
RespPr_MoveS1_150	15	61	rechts	weiblich	143	3	neuInnen	neutralInnen	List5	rechts.bmp	1	3	382410	3	428	382838
RespPr_MoveS1_150	15	61	rechts	weiblich	144	1	neuAussen	neutralAussen	List5	links.bmp	1	1	384423	1	463	384886
RespPr_MoveS1_150	15	61	rechts	weiblich	145	1	unrel	rechts	List5	links.bmp	1	1	386462	1	432	386894
RespPr_MoveS1_150	15	61	rechts	weiblich	146	3	rel	rechts	List5	rechts.bmp	1	3	388475	3	387	388862
RespPr_MoveS1_150	15	61	rechts	weiblich	147	1	neuInnen	neutralInnen	List5	links.bmp	1	1	390448	1	390	390838
RespPr_MoveS1_150	15	61	rechts	weiblich	148	3	neuAussen	neutralAussen	List5	rechts.bmp	1	3	392421	3	377	392798
RespPr_MoveS1_150	15	61	rechts	weiblich	149	1	rel	links	List5	links.bmp	1	1	394380	1	378	394758
RespPr_MoveS1_150	15	61	rechts	weiblich	150	1	rel	links	List5	links.bmp	1	1	396339	1	363	396702
RespPr_MoveS1_150	15	61	rechts	weiblich	151	1	rel	links	List5	links.bmp	1	1	398285	1	401	398686
RespPr_MoveS1_150	15	61	rechts	weiblich	152	3	neuInnen	neutralInnen	List5	rechts.bmp	1	3	400271	3	455	400726
RespPr_MoveS1_150	15	61	rechts	weiblich	153	3	neuAussen	neutralAussen	List5	rechts.bmp	1	3	402311	3	350	402661
RespPr_MoveS1_150	15	61	rechts	weiblich	154	1	unrel	rechts	List5	links.bmp	1	1	404257	1	381	404638
RespPr_MoveS1_150	15	61	rechts	weiblich	155	1	rel	links	List5	links.bmp	1	1	406216	1	398	406614
RespPr_MoveS1_150	15	61	rechts	weiblich	156	3	rel	rechts	List5	rechts.bmp	1	3	408202	3	324	408526
RespPr_MoveS1_150	16	61	rechts	weiblich	1	3	neuInnen	neutralInnen	List1	rechts.bmp	1	3	96885	3	1068	97953
RespPr_MoveS1_150	16	61	rechts	weiblich	2	1	neuAussen	neutralAussen	List1	links.bmp	1	1	99537	1	647	100184
RespPr_MoveS1_150	16	61	rechts	weiblich	3	1	unrel	rechts	List1	links.bmp	1	1	101763	1	573	102336
RespPr_MoveS1_150	16	61	rechts	weiblich	4	3	rel	rechts	List1	rechts.bmp	1	3	103922	3	511	104433
RespPr_MoveS1_150	16	61	rechts	weiblich	5	3	neuAussen	neutralAussen	List1	rechts.bmp	1	3	106015	3	458	106473
RespPr_MoveS1_150	16	61	rechts	weiblich	6	3	unrel	links	List1	rechts.bmp	1	3	108054	3	443	108497
RespPr_MoveS1_150	16	61	rechts	weiblich	7	3	unrel	links	List1	rechts.bmp	1	3	110080	3	392	110472
RespPr_MoveS1_150	16	61	rechts	weiblich	8	1	neuInnen	neutralInnen	List1	links.bmp	1	1	112053	1	588	112641
RespPr_MoveS1_150	16	61	rechts	weiblich	9	1	rel	links	List1	links.bmp	1	1	114225	1	480	114705
RespPr_MoveS1_150	16	61	rechts	weiblich	10	1	rel	links	List1	links.bmp	1	1	116291	1	486	116777
RespPr_MoveS1_150	16	61	rechts	weiblich	11	1	unrel	rechts	List1	links.bmp	1	1	118357	1	524	118881
RespPr_MoveS1_150	16	61	rechts	weiblich	12	3	rel	rechts	List1	rechts.bmp	1	3	120463	3	490	120953
RespPr_MoveS1_150	16	61	rechts	weiblich	13	3	rel	rechts	List2	rechts.bmp	1	3	159784	3	424	160208
RespPr_MoveS1_150	16	61	rechts	weiblich	14	3	unrel	links	List2	rechts.bmp	1	3	161796	3	477	162273
RespPr_MoveS1_150	16	61	rechts	weiblich	15	1	unrel	rechts	List2	links.bmp	1	1	163836	1	412	164248
RespPr_MoveS1_150	16	61	rechts	weiblich	16	3	unrel	links	List2	rechts.bmp	1	3	165822	3	355	166177
RespPr_MoveS1_150	16	61	rechts	weiblich	17	1	neuInnen	neutralInnen	List2	links.bmp	1	1	167754	1	391	168145
RespPr_MoveS1_150	16	61	rechts	weiblich	18	1	unrel	rechts	List2	links.bmp	1	1	169714	1	455	170169
RespPr_MoveS1_150	16	61	rechts	weiblich	19	3	unrel	links	List2	rechts.bmp	1	3	171740	3	388	172128
RespPr_MoveS1_150	16	61	rechts	weiblich	20	3	unrel	links	List2	rechts.bmp	1	3	173712	3	417	174129
RespPr_MoveS1_150	16	61	rechts	weiblich	21	3	rel	rechts	List2	rechts.bmp	1	3	175712	3	377	176089
RespPr_MoveS1_150	16	61	rechts	weiblich	22	1	rel	links	List2	links.bmp	1	1	177671	1	354	178025
RespPr_MoveS1_150	16	61	rechts	weiblich	23	3	unrel	links	List2	rechts.bmp	1	3	179604	3	413	180017
RespPr_MoveS1_150	16	61	rechts	weiblich	24	3	rel	rechts	List2	rechts.bmp	1	3	181603	3	366	181969
RespPr_MoveS1_150	16	61	rechts	weiblich	25	1	unrel	rechts	List2	links.bmp	1	1	183549	1	483	184032
RespPr_MoveS1_150	16	61	rechts	weiblich	26	3	neuAussen	neutralAussen	List2	rechts.bmp	1	3	185615	3	426	186041
RespPr_MoveS1_150	16	61	rechts	weiblich	27	1	rel	links	List2	links.bmp	1	1	187628	1	420	188048
RespPr_MoveS1_150	16	61	rechts	weiblich	28	1	neuInnen	neutralInnen	List2	links.bmp	1	1	189627	1	390	190017
RespPr_MoveS1_150	16	61	rechts	weiblich	29	3	neuInnen	neutralInnen	List2	rechts.bmp	1	3	191600	3	497	192097
RespPr_MoveS1_150	16	61	rechts	weiblich	30	1	rel	links	List2	links.bmp	1	1	193679	1	354	194033
RespPr_MoveS1_150	16	61	rechts	weiblich	31	1	unrel	rechts	List2	links.bmp	1	1	195612	1	477	196089
RespPr_MoveS1_150	16	61	rechts	weiblich	32	3	neuInnen	neutralInnen	List2	rechts.bmp	1	3	197678	3	419	198097
RespPr_MoveS1_150	16	61	rechts	weiblich	33	1	unrel	rechts	List2	links.bmp	1	1	199677	1	356	200033
RespPr_MoveS1_150	16	61	rechts	weiblich	34	3	unrel	links	List2	rechts.bmp	1	3	201610	3	390	202000
RespPr_MoveS1_150	16	61	rechts	weiblich	35	1	neuInnen	neutralInnen	List2	links.bmp	1	1	203583	1	481	204064
RespPr_MoveS1_150	16	61	rechts	weiblich	36	1	neuAussen	neutralAussen	List2	links.bmp	1	1	205649	1	416	206065
RespPr_MoveS1_150	16	61	rechts	weiblich	37	1	rel	links	List2	links.bmp	1	1	207648	1	432	208080
RespPr_MoveS1_150	16	61	rechts	weiblich	38	1	neuAussen	neutralAussen	List2	links.bmp	1	1	209661	1	404	210065
RespPr_MoveS1_150	16	61	rechts	weiblich	39	3	neuAussen	neutralAussen	List2	rechts.bmp	1	3	211647	3	450	212097
RespPr_MoveS1_150	16	61	rechts	weiblich	40	1	rel	links	List2	links.bmp	1	1	213673	1	432	214105
RespPr_MoveS1_150	16	61	rechts	weiblich	41	1	unrel	rechts	List2	links.bmp	1	1	215685	1	443	216128
RespPr_MoveS1_150	16	61	rechts	weiblich	42	3	rel	rechts	List2	rechts.bmp	1	3	217711	3	474	218185
RespPr_MoveS1_150	16	61	rechts	weiblich	43	1	neuAussen	neutralAussen	List2	links.bmp	1	1	219764	1	421	220185
RespPr_MoveS1_150	16	61	rechts	weiblich	44	3	rel	rechts	List2	rechts.bmp	1	3	221763	3	430	222193
RespPr_MoveS1_150	16	61	rechts	weiblich	45	3	neuAussen	neutralAussen	List2	rechts.bmp	1	3	223776	3	377	224153
RespPr_MoveS1_150	16	61	rechts	weiblich	46	3	neuInnen	neutralInnen	List2	rechts.bmp	1	3	225735	3	482	226217
RespPr_MoveS1_150	16	61	rechts	weiblich	47	1	rel	links	List2	links.bmp	1	1	227801	1	416	228217
RespPr_MoveS1_150	16	61	rechts	weiblich	48	3	rel	rechts	List2	rechts.bmp	1	3	229801	3	432	230233
RespPr_MoveS1_150	16	61	rechts	weiblich	49	1	unrel	rechts	List3	links.bmp	1	1	235772	1	461	236233
RespPr_MoveS1_150	16	61	rechts	weiblich	50	1	unrel	rechts	List3	links.bmp	1	1	237811	1	461	238272
RespPr_MoveS1_150	16	61	rechts	weiblich	51	3	neuInnen	neutralInnen	List3	rechts.bmp	1	3	239851	3	454	240305
RespPr_MoveS1_150	16	61	rechts	weiblich	52	1	neuInnen	neutralInnen	List3	links.bmp	1	1	241890	1	390	242280
RespPr_MoveS1_150	16	61	rechts	weiblich	53	1	rel	links	List3	links.bmp	1	1	243863	1	378	244241
RespPr_MoveS1_150	16	61	rechts	weiblich	54	3	neuInnen	neutralInnen	List3	rechts.bmp	1	3	245822	3	459	246281
RespPr_MoveS1_150	16	61	rechts	weiblich	55	3	unrel	links	List3	rechts.bmp	1	3	247861	3	412	248273
RespPr_MoveS1_150	16	61	rechts	weiblich	56	3	neuAussen	neutralAussen	List3	rechts.bmp	1	3	249861	3	396	250257
RespPr_MoveS1_150	16	61	rechts	weiblich	57	3	neuAussen	neutralAussen	List3	rechts.bmp	1	3	251833	3	376	252209
RespPr_MoveS1_150	16	61	rechts	weiblich	58	3	rel	rechts	List3	rechts.bmp	1	3	253793	3	352	254145
RespPr_MoveS1_150	16	61	rechts	weiblich	59	3	rel	rechts	List3	rechts.bmp	1	3	255725	3	380	256105
RespPr_MoveS1_150	16	61	rechts	weiblich	60	1	rel	links	List3	links.bmp	1	1	257685	1	395	258080
RespPr_MoveS1_150	16	61	rechts	weiblich	61	1	unrel	rechts	List3	links.bmp	1	1	259657	1	360	260017
RespPr_MoveS1_150	16	61	rechts	weiblich	62	1	rel	links	List3	links.bmp	1	1	261603	1	438	262041
RespPr_MoveS1_150	16	61	rechts	weiblich	63	3	unrel	links	List3	rechts.bmp	1	3	263629	3	468	264097
RespPr_MoveS1_150	16	61	rechts	weiblich	64	3	unrel	links	List3	rechts.bmp	1	3	265669	3	356	266025
RespPr_MoveS1_150	16	61	rechts	weiblich	65	1	rel	links	List3	links.bmp	1	1	267601	1	392	267993
RespPr_MoveS1_150	16	61	rechts	weiblich	66	1	neuAussen	neutralAussen	List3	links.bmp	1	1	269561	1	360	269921
RespPr_MoveS1_150	16	61	rechts	weiblich	67	3	neuInnen	neutralInnen	List3	rechts.bmp	1	3	271507	3	438	271945
RespPr_MoveS1_150	16	61	rechts	weiblich	68	1	unrel	rechts	List3	links.bmp	1	1	273533	1	468	274001
RespPr_MoveS1_150	16	61	rechts	weiblich	69	3	neuAussen	neutralAussen	List3	rechts.bmp	1	3	275585	3	352	275937
RespPr_MoveS1_150	16	61	rechts	weiblich	70	1	rel	links	List3	links.bmp	1	1	277505	1	511	278016
RespPr_MoveS1_150	16	61	rechts	weiblich	71	1	neuAussen	neutralAussen	List3	links.bmp	1	1	279597	1	420	280017
RespPr_MoveS1_150	16	61	rechts	weiblich	72	3	rel	rechts	List3	rechts.bmp	1	3	281597	3	372	281969
RespPr_MoveS1_150	16	61	rechts	weiblich	73	3	unrel	links	List3	rechts.bmp	1	3	283556	3	429	283985
RespPr_MoveS1_150	16	61	rechts	weiblich	74	1	neuInnen	neutralInnen	List3	links.bmp	1	1	285569	1	440	286009
RespPr_MoveS1_150	16	61	rechts	weiblich	75	3	rel	rechts	List3	rechts.bmp	1	3	287595	3	477	288072
RespPr_MoveS1_150	16	61	rechts	weiblich	76	1	unrel	rechts	List3	links.bmp	1	1	289661	1	420	290081
RespPr_MoveS1_150	16	61	rechts	weiblich	77	1	unrel	rechts	List3	links.bmp	1	1	291647	1	433	292080
RespPr_MoveS1_150	16	61	rechts	weiblich	78	1	neuInnen	neutralInnen	List3	links.bmp	1	1	293659	1	438	294097
RespPr_MoveS1_150	16	61	rechts	weiblich	79	3	unrel	links	List3	rechts.bmp	1	3	295685	3	412	296097
RespPr_MoveS1_150	16	61	rechts	weiblich	80	1	rel	links	List3	links.bmp	1	1	297685	1	404	298089
RespPr_MoveS1_150	16	61	rechts	weiblich	81	3	rel	rechts	List3	rechts.bmp	1	3	299671	3	426	300097
RespPr_MoveS1_150	16	61	rechts	weiblich	82	3	rel	rechts	List3	rechts.bmp	1	3	301683	3	390	302073
RespPr_MoveS1_150	16	61	rechts	weiblich	83	1	neuAussen	neutralAussen	List3	links.bmp	1	1	303656	1	457	304113
RespPr_MoveS1_150	16	61	rechts	weiblich	84	3	unrel	links	List3	rechts.bmp	1	3	305695	3	394	306089
RespPr_MoveS1_150	16	61	rechts	weiblich	85	1	neuInnen	neutralInnen	List4	links.bmp	1	1	310547	1	430	310977
RespPr_MoveS1_150	16	61	rechts	weiblich	86	1	rel	links	List4	links.bmp	1	1	312560	1	321	312881
RespPr_MoveS1_150	16	61	rechts	weiblich	87	1	neuAussen	neutralAussen	List4	links.bmp	1	1	314466	1	431	314897
RespPr_MoveS1_150	16	61	rechts	weiblich	88	1	rel	links	List4	links.bmp	1	1	316479	1	378	316857
RespPr_MoveS1_150	16	61	rechts	weiblich	89	1	rel	links	List4	links.bmp	1	1	318438	1	379	318817
RespPr_MoveS1_150	16	61	rechts	weiblich	90	1	neuInnen	neutralInnen	List4	links.bmp	1	1	320397	1	404	320801
RespPr_MoveS1_150	16	61	rechts	weiblich	91	3	rel	rechts	List4	rechts.bmp	1	3	322383	3	410	322793
RespPr_MoveS1_150	16	61	rechts	weiblich	92	1	rel	links	List4	links.bmp	1	1	324369	1	632	325001
RespPr_MoveS1_150	16	61	rechts	weiblich	93	3	unrel	links	List4	rechts.bmp	1	3	326582	3	467	327049
RespPr_MoveS1_150	16	61	rechts	weiblich	94	1	unrel	rechts	List4	links.bmp	1	1	328635	1	398	329033
RespPr_MoveS1_150	16	61	rechts	weiblich	95	1	neuAussen	neutralAussen	List4	links.bmp	1	1	330621	1	395	331016
RespPr_MoveS1_150	16	61	rechts	weiblich	96	3	unrel	links	List4	rechts.bmp	1	3	332593	3	471	333064
RespPr_MoveS1_150	16	61	rechts	weiblich	97	3	unrel	links	List4	rechts.bmp	1	3	334646	3	475	335121
RespPr_MoveS1_150	16	61	rechts	weiblich	98	1	unrel	rechts	List4	links.bmp	1	1	336699	1	406	337105
RespPr_MoveS1_150	16	61	rechts	weiblich	99	3	neuAussen	neutralAussen	List4	rechts.bmp	1	3	338685	3	428	339113
RespPr_MoveS1_150	16	61	rechts	weiblich	100	1	unrel	rechts	List4	links.bmp	1	1	340697	1	447	341144
RespPr_MoveS1_150	16	61	rechts	weiblich	101	3	rel	rechts	List4	rechts.bmp	1	3	342723	3	390	343113
RespPr_MoveS1_150	16	61	rechts	weiblich	102	3	rel	rechts	List4	rechts.bmp	1	3	344696	3	369	345065
RespPr_MoveS1_150	16	61	rechts	weiblich	103	3	neuInnen	neutralInnen	List4	rechts.bmp	1	3	346642	3	479	347121
RespPr_MoveS1_150	16	61	rechts	weiblich	104	3	unrel	links	List4	rechts.bmp	1	3	348708	3	397	349105
RespPr_MoveS1_150	16	61	rechts	weiblich	105	3	neuAussen	neutralAussen	List4	rechts.bmp	1	3	350681	3	328	351009
RespPr_MoveS1_150	16	61	rechts	weiblich	106	1	neuAussen	neutralAussen	List4	links.bmp	1	1	352587	1	454	353041
RespPr_MoveS1_150	16	61	rechts	weiblich	107	3	rel	rechts	List4	rechts.bmp	1	3	354626	3	343	354969
RespPr_MoveS1_150	16	61	rechts	weiblich	108	1	unrel	rechts	List4	links.bmp	1	1	356545	1	440	356985
RespPr_MoveS1_150	16	61	rechts	weiblich	109	3	neuInnen	neutralInnen	List4	rechts.bmp	1	3	358571	3	358	358929
RespPr_MoveS1_150	16	61	rechts	weiblich	110	1	rel	links	List4	links.bmp	1	1	360517	1	339	360856
RespPr_MoveS1_150	16	61	rechts	weiblich	111	3	unrel	links	List4	rechts.bmp	1	3	362437	3	380	362817
RespPr_MoveS1_150	16	61	rechts	weiblich	112	3	neuInnen	neutralInnen	List4	rechts.bmp	1	3	364383	3	442	364825
RespPr_MoveS1_150	16	61	rechts	weiblich	113	3	unrel	links	List4	rechts.bmp	1	3	366409	3	432	366841
RespPr_MoveS1_150	16	61	rechts	weiblich	114	1	unrel	rechts	List4	links.bmp	1	1	368421	1	483	368904
RespPr_MoveS1_150	16	61	rechts	weiblich	115	3	rel	rechts	List4	rechts.bmp	1	3	370487	3	394	370881
RespPr_MoveS1_150	16	61	rechts	weiblich	116	3	rel	rechts	List4	rechts.bmp	1	3	372447	3	386	372833
RespPr_MoveS1_150	16	61	rechts	weiblich	117	1	unrel	rechts	List4	links.bmp	1	1	374419	1	494	374913
RespPr_MoveS1_150	16	61	rechts	weiblich	118	3	neuAussen	neutralAussen	List4	rechts.bmp	1	3	376499	3	406	376905
RespPr_MoveS1_150	16	61	rechts	weiblich	119	1	neuInnen	neutralInnen	List4	links.bmp	1	1	378485	1	484	378969
RespPr_MoveS1_150	16	61	rechts	weiblich	120	1	rel	links	List4	links.bmp	1	1	380551	1	410	380961
RespPr_MoveS1_150	16	61	rechts	weiblich	121	1	unrel	rechts	List5	links.bmp	1	1	392493	1	452	392945
RespPr_MoveS1_150	16	61	rechts	weiblich	122	1	rel	links	List5	links.bmp	1	1	394533	1	388	394921
RespPr_MoveS1_150	16	61	rechts	weiblich	123	3	unrel	links	List5	rechts.bmp	1	3	396505	3	408	396913
RespPr_MoveS1_150	16	61	rechts	weiblich	124	3	rel	rechts	List5	rechts.bmp	1	3	398491	3	374	398865
RespPr_MoveS1_150	16	61	rechts	weiblich	125	1	unrel	rechts	List5	links.bmp	1	1	400451	1	438	400889
RespPr_MoveS1_150	16	61	rechts	weiblich	126	1	rel	links	List5	links.bmp	1	1	402477	1	532	403009
RespPr_MoveS1_150	16	61	rechts	weiblich	127	3	neuAussen	neutralAussen	List5	rechts.bmp	1	3	404583	3	394	404977
RespPr_MoveS1_150	16	61	rechts	weiblich	128	1	rel	links	List5	links.bmp	1	1	406555	1	374	406929
RespPr_MoveS1_150	16	61	rechts	weiblich	129	1	unrel	rechts	List5	links.bmp	1	1	408515	1	478	408993
RespPr_MoveS1_150	16	61	rechts	weiblich	130	1	neuInnen	neutralInnen	List5	links.bmp	1	1	410581	1	435	411016
RespPr_MoveS1_150	16	61	rechts	weiblich	131	3	neuAussen	neutralAussen	List5	rechts.bmp	1	3	412593	3	511	413104
RespPr_MoveS1_150	16	61	rechts	weiblich	132	3	neuInnen	neutralInnen	List5	rechts.bmp	1	3	414673	3	456	415129
RespPr_MoveS1_150	16	61	rechts	weiblich	133	1	neuInnen	neutralInnen	List5	links.bmp	1	1	416699	1	366	417065
RespPr_MoveS1_150	16	61	rechts	weiblich	134	3	neuInnen	neutralInnen	List5	rechts.bmp	1	3	418645	3	436	419081
RespPr_MoveS1_150	16	61	rechts	weiblich	135	3	rel	rechts	List5	rechts.bmp	1	3	420657	3	456	421113
RespPr_MoveS1_150	16	61	rechts	weiblich	136	3	unrel	links	List5	rechts.bmp	1	3	422697	3	455	423152
RespPr_MoveS1_150	16	61	rechts	weiblich	137	1	neuInnen	neutralInnen	List5	links.bmp	1	1	424723	1	422	425145
RespPr_MoveS1_150	16	61	rechts	weiblich	138	1	rel	links	List5	links.bmp	1	1	426709	1	468	427177
RespPr_MoveS1_150	16	61	rechts	weiblich	139	3	unrel	links	List5	rechts.bmp	1	3	428761	3	456	429217
RespPr_MoveS1_150	16	61	rechts	weiblich	140	3	rel	rechts	List5	rechts.bmp	1	3	430801	3	406	431207
RespPr_MoveS1_150	16	61	rechts	weiblich	141	3	rel	rechts	List5	rechts.bmp	1	3	432787	3	326	433113
RespPr_MoveS1_150	16	61	rechts	weiblich	142	3	neuInnen	neutralInnen	List5	rechts.bmp	1	3	434693	3	372	435065
RespPr_MoveS1_150	16	61	rechts	weiblich	143	1	rel	links	List5	links.bmp	1	1	436652	1	373	437025
RespPr_MoveS1_150	16	61	rechts	weiblich	144	1	unrel	rechts	List5	links.bmp	1	1	438612	1	469	439081
RespPr_MoveS1_150	16	61	rechts	weiblich	145	1	neuAussen	neutralAussen	List5	links.bmp	1	1	440664	1	433	441097
RespPr_MoveS1_150	16	61	rechts	weiblich	146	1	unrel	rechts	List5	links.bmp	1	1	442677	1	420	443097
RespPr_MoveS1_150	16	61	rechts	weiblich	147	3	neuAussen	neutralAussen	List5	rechts.bmp	1	3	444676	3	445	445121
RespPr_MoveS1_150	16	61	rechts	weiblich	148	3	rel	rechts	List5	rechts.bmp	1	3	446702	3	411	447113
RespPr_MoveS1_150	16	61	rechts	weiblich	149	1	unrel	rechts	List5	links.bmp	1	1	448702	1	483	449185
RespPr_MoveS1_150	16	61	rechts	weiblich	150	1	neuAussen	neutralAussen	List5	links.bmp	1	1	450767	1	370	451137
RespPr_MoveS1_150	16	61	rechts	weiblich	151	3	unrel	links	List5	rechts.bmp	1	3	452714	3	375	453089
RespPr_MoveS1_150	16	61	rechts	weiblich	152	3	rel	rechts	List5	rechts.bmp	1	3	454673	3	368	455041
RespPr_MoveS1_150	16	61	rechts	weiblich	153	1	neuAussen	neutralAussen	List5	links.bmp	1	1	456619	1	430	457049
RespPr_MoveS1_150	16	61	rechts	weiblich	154	3	unrel	links	List5	rechts.bmp	1	3	458632	3	377	459009
RespPr_MoveS1_150	16	61	rechts	weiblich	155	3	unrel	links	List5	rechts.bmp	1	3	460591	3	489	461080
RespPr_MoveS1_150	16	61	rechts	weiblich	156	1	rel	links	List5	links.bmp	1	1	462657	1	392	463049
RespPr_MoveS1_150	17	76	rechts	weiblich	1	1	unrel	rechts	List1	links.bmp	1	1	114671	1	1043	115714
RespPr_MoveS1_150	17	76	rechts	weiblich	2	1	unrel	rechts	List1	links.bmp	1	1	117297	1	664	117961
RespPr_MoveS1_150	17	76	rechts	weiblich	3	1	rel	links	List1	links.bmp	1	1	119550	1	660	120210
RespPr_MoveS1_150	17	76	rechts	weiblich	4	3	unrel	links	List1	rechts.bmp	1	3	121776	3	785	122561
RespPr_MoveS1_150	17	76	rechts	weiblich	5	3	unrel	links	List1	rechts.bmp	1	3	124148	3	589	124737
RespPr_MoveS1_150	17	76	rechts	weiblich	6	3	neuInnen	neutralInnen	List1	rechts.bmp	1	3	126321	3	585	126906
RespPr_MoveS1_150	17	76	rechts	weiblich	7	3	rel	rechts	List1	rechts.bmp	1	3	128493	3	652	129145
RespPr_MoveS1_150	17	76	rechts	weiblich	8	1	rel	links	List1	links.bmp	1	1	130733	1	524	131257
RespPr_MoveS1_150	17	76	rechts	weiblich	9	1	neuInnen	neutralInnen	List1	links.bmp	1	1	132839	1	634	133473
RespPr_MoveS1_150	17	76	rechts	weiblich	10	3	rel	rechts	List1	rechts.bmp	1	3	135051	3	503	135554
RespPr_MoveS1_150	17	76	rechts	weiblich	11	1	neuAussen	neutralAussen	List1	links.bmp	1	1	137131	1	558	137689
RespPr_MoveS1_150	17	76	rechts	weiblich	12	3	neuAussen	neutralAussen	List1	rechts.bmp	1	3	139277	3	517	139794
RespPr_MoveS1_150	17	76	rechts	weiblich	13	3	neuInnen	neutralInnen	List2	rechts.bmp	1	3	167121	3	744	167865
RespPr_MoveS1_150	17	76	rechts	weiblich	14	1	rel	links	List2	links.bmp	1	1	169453	1	637	170090
RespPr_MoveS1_150	17	76	rechts	weiblich	15	3	unrel	links	List2	rechts.bmp	1	3	171666	3	591	172257
RespPr_MoveS1_150	17	76	rechts	weiblich	16	1	neuAussen	neutralAussen	List2	links.bmp	1	1	173838	1	403	174241
RespPr_MoveS1_150	17	76	rechts	weiblich	17	1	unrel	rechts	List2	links.bmp	1	1	175824	1	577	176401
RespPr_MoveS1_150	17	76	rechts	weiblich	18	1	unrel	rechts	List2	links.bmp	1	1	177984	1	497	178481
RespPr_MoveS1_150	17	76	rechts	weiblich	19	1	rel	links	List2	links.bmp	1	1	180050	1	440	180490
RespPr_MoveS1_150	17	76	rechts	weiblich	20	1	rel	links	List2	links.bmp	1	1	182076	1	533	182609
RespPr_MoveS1_150	17	76	rechts	weiblich	21	3	rel	rechts	List2	rechts.bmp	1	3	184182	3	540	184722
RespPr_MoveS1_150	17	76	rechts	weiblich	22	1	neuAussen	neutralAussen	List2	links.bmp	1	1	186301	1	436	186737
RespPr_MoveS1_150	17	76	rechts	weiblich	23	1	neuInnen	neutralInnen	List2	links.bmp	1	1	188314	1	431	188745
RespPr_MoveS1_150	17	76	rechts	weiblich	24	3	neuInnen	neutralInnen	List2	rechts.bmp	1	3	190326	3	547	190873
RespPr_MoveS1_150	17	76	rechts	weiblich	25	3	unrel	links	List2	rechts.bmp	1	3	192459	3	646	193105
RespPr_MoveS1_150	17	76	rechts	weiblich	26	1	unrel	rechts	List2	links.bmp	1	1	194685	1	428	195113
RespPr_MoveS1_150	17	76	rechts	weiblich	27	3	rel	rechts	List2	rechts.bmp	1	3	196698	3	479	197177
RespPr_MoveS1_150	17	76	rechts	weiblich	28	1	rel	links	List2	links.bmp	1	1	198764	1	477	199241
RespPr_MoveS1_150	17	76	rechts	weiblich	29	1	neuInnen	neutralInnen	List2	links.bmp	1	1	200830	1	555	201385
RespPr_MoveS1_150	17	76	rechts	weiblich	30	3	unrel	links	List2	rechts.bmp	1	3	202962	3	799	203761
RespPr_MoveS1_150	17	76	rechts	weiblich	31	3	rel	rechts	List2	rechts.bmp	1	3	205335	3	698	206033
RespPr_MoveS1_150	17	76	rechts	weiblich	32	1	rel	links	List2	links.bmp	1	1	207614	1	643	208257
RespPr_MoveS1_150	17	76	rechts	weiblich	33	3	unrel	links	List2	rechts.bmp	1	3	209840	3	665	210505
RespPr_MoveS1_150	17	76	rechts	weiblich	34	3	unrel	links	List2	rechts.bmp	1	3	212092	3	694	212786
RespPr_MoveS1_150	17	76	rechts	weiblich	35	1	unrel	rechts	List2	links.bmp	1	1	214372	1	565	214937
RespPr_MoveS1_150	17	76	rechts	weiblich	36	1	unrel	rechts	List2	links.bmp	1	1	216518	1	588	217106
RespPr_MoveS1_150	17	76	rechts	weiblich	37	3	rel	rechts	List2	rechts.bmp	1	3	218690	3	1199	219889
RespPr_MoveS1_150	17	76	rechts	weiblich	38	3	neuAussen	neutralAussen	List2	rechts.bmp	1	3	221463	3	634	222097
RespPr_MoveS1_150	17	76	rechts	weiblich	39	1	unrel	rechts	List2	links.bmp	1	1	223675	1	446	224121
RespPr_MoveS1_150	17	76	rechts	weiblich	40	1	rel	links	List2	links.bmp	1	1	225701	1	500	226201
RespPr_MoveS1_150	17	76	rechts	weiblich	41	3	neuAussen	neutralAussen	List2	rechts.bmp	1	3	227781	3	580	228361
RespPr_MoveS1_150	17	76	rechts	weiblich	42	1	neuInnen	neutralInnen	List2	links.bmp	1	1	229940	1	541	230481
RespPr_MoveS1_150	17	76	rechts	weiblich	43	3	rel	rechts	List2	rechts.bmp	1	3	232059	3	614	232673
RespPr_MoveS1_150	17	76	rechts	weiblich	44	3	neuInnen	neutralInnen	List2	rechts.bmp	1	3	234258	3	535	234793
RespPr_MoveS1_150	17	76	rechts	weiblich	45	3	unrel	links	List2	rechts.bmp	1	3	236378	3	487	236865
RespPr_MoveS1_150	17	76	rechts	weiblich	46	3	neuAussen	neutralAussen	List2	rechts.bmp	1	3	238444	3	454	238898
RespPr_MoveS1_150	17	76	rechts	weiblich	47	1	neuAussen	neutralAussen	List2	links.bmp	1	1	240470	1	459	240929
RespPr_MoveS1_150	17	76	rechts	weiblich	48	3	rel	rechts	List2	rechts.bmp	1	3	242496	3	481	242977
RespPr_MoveS1_150	17	76	rechts	weiblich	49	3	unrel	links	List3	rechts.bmp	1	3	248280	3	602	248882
RespPr_MoveS1_150	17	76	rechts	weiblich	50	1	neuAussen	neutralAussen	List3	links.bmp	1	1	250466	1	455	250921
RespPr_MoveS1_150	17	76	rechts	weiblich	51	3	unrel	links	List3	rechts.bmp	1	3	252506	3	560	253066
RespPr_MoveS1_150	17	76	rechts	weiblich	52	1	neuInnen	neutralInnen	List3	links.bmp	1	1	254652	1	373	255025
RespPr_MoveS1_150	17	76	rechts	weiblich	53	3	neuAussen	neutralAussen	List3	rechts.bmp	1	3	256598	3	436	257034
RespPr_MoveS1_150	17	76	rechts	weiblich	54	3	unrel	links	List3	rechts.bmp	1	3	258610	3	375	258985
RespPr_MoveS1_150	17	76	rechts	weiblich	55	3	rel	rechts	List3	rechts.bmp	1	3	260570	3	351	260921
RespPr_MoveS1_150	17	76	rechts	weiblich	56	3	unrel	links	List3	rechts.bmp	1	3	262502	3	339	262841
RespPr_MoveS1_150	17	76	rechts	weiblich	57	3	neuInnen	neutralInnen	List3	rechts.bmp	1	3	264422	3	403	264825
RespPr_MoveS1_150	17	76	rechts	weiblich	58	1	rel	links	List3	links.bmp	1	1	266408	1	354	266762
RespPr_MoveS1_150	17	76	rechts	weiblich	59	1	rel	links	List3	links.bmp	1	1	268341	1	540	268881
RespPr_MoveS1_150	17	76	rechts	weiblich	60	1	neuInnen	neutralInnen	List3	links.bmp	1	1	270460	1	566	271026
RespPr_MoveS1_150	17	76	rechts	weiblich	61	3	unrel	links	List3	rechts.bmp	1	3	272606	3	556	273162
RespPr_MoveS1_150	17	76	rechts	weiblich	62	3	rel	rechts	List3	rechts.bmp	1	3	274738	3	503	275241
RespPr_MoveS1_150	17	76	rechts	weiblich	63	3	rel	rechts	List3	rechts.bmp	1	3	276818	3	407	277225
RespPr_MoveS1_150	17	76	rechts	weiblich	64	3	neuAussen	neutralAussen	List3	rechts.bmp	1	3	278804	3	398	279202
RespPr_MoveS1_150	17	76	rechts	weiblich	65	1	rel	links	List3	links.bmp	1	1	280790	1	476	281266
RespPr_MoveS1_150	17	76	rechts	weiblich	66	1	neuAussen	neutralAussen	List3	links.bmp	1	1	282842	1	471	283313
RespPr_MoveS1_150	17	76	rechts	weiblich	67	1	unrel	rechts	List3	links.bmp	1	1	284882	1	488	285370
RespPr_MoveS1_150	17	76	rechts	weiblich	68	1	unrel	rechts	List3	links.bmp	1	1	286948	1	486	287434
RespPr_MoveS1_150	17	76	rechts	weiblich	69	1	unrel	rechts	List3	links.bmp	1	1	289014	1	411	289425
RespPr_MoveS1_150	17	76	rechts	weiblich	70	1	rel	links	List3	links.bmp	1	1	291000	1	546	291546
RespPr_MoveS1_150	17	76	rechts	weiblich	71	1	rel	links	List3	links.bmp	1	1	293132	1	422	293554
RespPr_MoveS1_150	17	76	rechts	weiblich	72	3	neuInnen	neutralInnen	List3	rechts.bmp	1	3	295132	3	573	295705
RespPr_MoveS1_150	17	76	rechts	weiblich	73	3	unrel	links	List3	rechts.bmp	1	3	297291	3	366	297657
RespPr_MoveS1_150	17	76	rechts	weiblich	74	1	unrel	rechts	List3	links.bmp	1	1	299237	1	404	299641
RespPr_MoveS1_150	17	76	rechts	weiblich	75	3	neuAussen	neutralAussen	List3	rechts.bmp	1	3	301223	3	514	301737
RespPr_MoveS1_150	17	76	rechts	weiblich	76	1	unrel	rechts	List3	links.bmp	1	1	303316	1	405	303721
RespPr_MoveS1_150	17	76	rechts	weiblich	77	3	rel	rechts	List3	rechts.bmp	1	3	305302	3	451	305753
RespPr_MoveS1_150	17	76	rechts	weiblich	78	1	neuInnen	neutralInnen	List3	links.bmp	1	1	307341	1	388	307729
RespPr_MoveS1_150	17	76	rechts	weiblich	79	3	neuInnen	neutralInnen	List3	rechts.bmp	1	3	309314	3	520	309834
RespPr_MoveS1_150	17	76	rechts	weiblich	80	1	unrel	rechts	List3	links.bmp	1	1	311420	1	550	311970
RespPr_MoveS1_150	17	76	rechts	weiblich	81	3	rel	rechts	List3	rechts.bmp	1	3	313552	3	458	314010
RespPr_MoveS1_150	17	76	rechts	weiblich	82	1	rel	links	List3	links.bmp	1	1	315592	1	386	315978
RespPr_MoveS1_150	17	76	rechts	weiblich	83	1	neuAussen	neutralAussen	List3	links.bmp	1	1	317564	1	509	318073
RespPr_MoveS1_150	17	76	rechts	weiblich	84	3	rel	rechts	List3	rechts.bmp	1	3	319657	3	472	320129
RespPr_MoveS1_150	17	76	rechts	weiblich	85	3	rel	rechts	List4	rechts.bmp	1	3	323736	3	593	324329
RespPr_MoveS1_150	17	76	rechts	weiblich	86	3	neuInnen	neutralInnen	List4	rechts.bmp	1	3	325908	3	493	326401
RespPr_MoveS1_150	17	76	rechts	weiblich	87	3	unrel	links	List4	rechts.bmp	1	3	327987	3	422	328409
RespPr_MoveS1_150	17	76	rechts	weiblich	88	1	neuAussen	neutralAussen	List4	links.bmp	1	1	329987	1	430	330417
RespPr_MoveS1_150	17	76	rechts	weiblich	89	1	unrel	rechts	List4	links.bmp	1	1	331999	1	466	332465
RespPr_MoveS1_150	17	76	rechts	weiblich	90	1	neuInnen	neutralInnen	List4	links.bmp	1	1	334039	1	379	334418
RespPr_MoveS1_150	17	76	rechts	weiblich	91	3	unrel	links	List4	rechts.bmp	1	3	335998	3	404	336402
RespPr_MoveS1_150	17	76	rechts	weiblich	92	1	unrel	rechts	List4	links.bmp	1	1	337984	1	466	338450
RespPr_MoveS1_150	17	76	rechts	weiblich	93	1	neuAussen	neutralAussen	List4	links.bmp	1	1	340037	1	388	340425
RespPr_MoveS1_150	17	76	rechts	weiblich	94	3	rel	rechts	List4	rechts.bmp	1	3	342009	3	432	342441
RespPr_MoveS1_150	17	76	rechts	weiblich	95	1	neuInnen	neutralInnen	List4	links.bmp	1	1	344022	1	387	344409
RespPr_MoveS1_150	17	76	rechts	weiblich	96	3	unrel	links	List4	rechts.bmp	1	3	345995	3	414	346409
RespPr_MoveS1_150	17	76	rechts	weiblich	97	1	rel	links	List4	links.bmp	1	1	347994	1	407	348401
RespPr_MoveS1_150	17	76	rechts	weiblich	98	3	neuInnen	neutralInnen	List4	rechts.bmp	1	3	349980	3	509	350489
RespPr_MoveS1_150	17	76	rechts	weiblich	99	3	neuAussen	neutralAussen	List4	rechts.bmp	1	3	352073	3	384	352457
RespPr_MoveS1_150	17	76	rechts	weiblich	100	1	neuInnen	neutralInnen	List4	links.bmp	1	1	354046	1	363	354409
RespPr_MoveS1_150	17	76	rechts	weiblich	101	1	rel	links	List4	links.bmp	1	1	355992	1	409	356401
RespPr_MoveS1_150	17	76	rechts	weiblich	102	3	rel	rechts	List4	rechts.bmp	1	3	357978	3	471	358449
RespPr_MoveS1_150	17	76	rechts	weiblich	103	3	rel	rechts	List4	rechts.bmp	1	3	360030	3	412	360442
RespPr_MoveS1_150	17	76	rechts	weiblich	104	1	rel	links	List4	links.bmp	1	1	362030	1	380	362410
RespPr_MoveS1_150	17	76	rechts	weiblich	105	1	unrel	rechts	List4	links.bmp	1	1	363989	1	444	364433
RespPr_MoveS1_150	17	76	rechts	weiblich	106	3	neuAussen	neutralAussen	List4	rechts.bmp	1	3	366015	3	450	366465
RespPr_MoveS1_150	17	76	rechts	weiblich	107	3	neuAussen	neutralAussen	List4	rechts.bmp	1	3	368041	3	432	368473
RespPr_MoveS1_150	17	76	rechts	weiblich	108	1	rel	links	List4	links.bmp	1	1	370054	1	443	370497
RespPr_MoveS1_150	17	76	rechts	weiblich	109	3	rel	rechts	List4	rechts.bmp	1	3	372080	3	394	372474
RespPr_MoveS1_150	17	76	rechts	weiblich	110	1	unrel	rechts	List4	links.bmp	1	1	374052	1	389	374441
RespPr_MoveS1_150	17	76	rechts	weiblich	111	1	neuAussen	neutralAussen	List4	links.bmp	1	1	376025	1	480	376505
RespPr_MoveS1_150	17	76	rechts	weiblich	112	1	unrel	rechts	List4	links.bmp	1	1	378091	1	510	378601
RespPr_MoveS1_150	17	76	rechts	weiblich	113	3	unrel	links	List4	rechts.bmp	1	3	380184	3	394	380578
RespPr_MoveS1_150	17	76	rechts	weiblich	114	3	unrel	links	List4	rechts.bmp	1	3	382156	3	557	382713
RespPr_MoveS1_150	17	76	rechts	weiblich	115	3	neuInnen	neutralInnen	List4	rechts.bmp	1	3	384302	3	492	384794
RespPr_MoveS1_150	17	76	rechts	weiblich	116	1	rel	links	List4	links.bmp	1	1	386381	1	436	386817
RespPr_MoveS1_150	17	76	rechts	weiblich	117	3	unrel	links	List4	rechts.bmp	1	3	388394	3	647	389041
RespPr_MoveS1_150	17	76	rechts	weiblich	118	1	unrel	rechts	List4	links.bmp	1	1	390607	1	378	390985
RespPr_MoveS1_150	17	76	rechts	weiblich	119	1	rel	links	List4	links.bmp	1	1	392553	1	425	392978
RespPr_MoveS1_150	17	76	rechts	weiblich	120	3	rel	rechts	List4	rechts.bmp	1	3	394565	3	501	395066
RespPr_MoveS1_150	17	76	rechts	weiblich	121	3	rel	rechts	List5	rechts.bmp	1	3	413986	3	519	414505
RespPr_MoveS1_150	17	76	rechts	weiblich	122	3	rel	rechts	List5	rechts.bmp	1	3	416092	3	469	416561
RespPr_MoveS1_150	17	76	rechts	weiblich	123	3	rel	rechts	List5	rechts.bmp	1	3	418144	3	441	418585
RespPr_MoveS1_150	17	76	rechts	weiblich	124	3	rel	rechts	List5	rechts.bmp	1	3	420170	3	503	420673
RespPr_MoveS1_150	17	76	rechts	weiblich	125	3	unrel	links	List5	rechts.bmp	1	3	422250	3	512	422762
RespPr_MoveS1_150	17	76	rechts	weiblich	126	3	unrel	links	List5	rechts.bmp	1	3	424342	3	499	424841
RespPr_MoveS1_150	17	76	rechts	weiblich	127	3	rel	rechts	List5	rechts.bmp	1	3	426422	3	380	426802
RespPr_MoveS1_150	17	76	rechts	weiblich	128	3	rel	rechts	List5	rechts.bmp	1	3	428381	3	405	428786
RespPr_MoveS1_150	17	76	rechts	weiblich	129	1	rel	links	List5	links.bmp	1	1	430367	1	379	430746
RespPr_MoveS1_150	17	76	rechts	weiblich	130	3	neuAussen	neutralAussen	List5	rechts.bmp	1	3	432326	3	627	432953
RespPr_MoveS1_150	17	76	rechts	weiblich	131	1	neuAussen	neutralAussen	List5	links.bmp	1	1	434539	1	391	434930
RespPr_MoveS1_150	17	76	rechts	weiblich	132	1	neuAussen	neutralAussen	List5	links.bmp	1	1	436512	1	793	437305
RespPr_MoveS1_150	17	76	rechts	weiblich	133	1	unrel	rechts	List5	links.bmp	1	1	438871	1	522	439393
RespPr_MoveS1_150	17	76	rechts	weiblich	134	3	unrel	links	List5	rechts.bmp	1	3	440977	3	625	441602
RespPr_MoveS1_150	17	76	rechts	weiblich	135	1	neuAussen	neutralAussen	List5	links.bmp	1	1	443189	1	508	443697
RespPr_MoveS1_150	17	76	rechts	weiblich	136	3	unrel	links	List5	rechts.bmp	1	3	445269	3	437	445706
RespPr_MoveS1_150	17	76	rechts	weiblich	137	1	unrel	rechts	List5	links.bmp	1	1	447295	1	474	447769
RespPr_MoveS1_150	17	76	rechts	weiblich	138	3	unrel	links	List5	rechts.bmp	1	3	449347	3	534	449881
RespPr_MoveS1_150	17	76	rechts	weiblich	139	3	unrel	links	List5	rechts.bmp	1	3	451467	3	495	451962
RespPr_MoveS1_150	17	76	rechts	weiblich	140	1	rel	links	List5	links.bmp	1	1	453546	1	392	453938
RespPr_MoveS1_150	17	76	rechts	weiblich	141	1	neuInnen	neutralInnen	List5	links.bmp	1	1	455519	1	435	455954
RespPr_MoveS1_150	17	76	rechts	weiblich	142	1	rel	links	List5	links.bmp	1	1	457531	1	438	457969
RespPr_MoveS1_150	17	76	rechts	weiblich	143	3	neuAussen	neutralAussen	List5	rechts.bmp	1	3	459557	3	597	460154
RespPr_MoveS1_150	17	76	rechts	weiblich	144	1	neuInnen	neutralInnen	List5	links.bmp	1	1	461730	1	487	462217
RespPr_MoveS1_150	17	76	rechts	weiblich	145	1	neuInnen	neutralInnen	List5	links.bmp	1	1	463796	1	493	464289
RespPr_MoveS1_150	17	76	rechts	weiblich	146	3	neuAussen	neutralAussen	List5	rechts.bmp	1	3	465875	3	478	466353
RespPr_MoveS1_150	17	76	rechts	weiblich	147	1	rel	links	List5	links.bmp	1	1	467941	1	500	468441
RespPr_MoveS1_150	17	76	rechts	weiblich	148	1	unrel	rechts	List5	links.bmp	1	1	470020	1	533	470553
RespPr_MoveS1_150	17	76	rechts	weiblich	149	3	neuInnen	neutralInnen	List5	rechts.bmp	1	3	472140	3	542	472682
RespPr_MoveS1_150	17	76	rechts	weiblich	150	1	rel	links	List5	links.bmp	1	1	474246	1	507	474753
RespPr_MoveS1_150	17	76	rechts	weiblich	151	3	neuInnen	neutralInnen	List5	rechts.bmp	1	3	476338	3	503	476841
RespPr_MoveS1_150	17	76	rechts	weiblich	152	1	unrel	rechts	List5	links.bmp	1	1	478418	1	431	478849
RespPr_MoveS1_150	17	76	rechts	weiblich	153	3	neuInnen	neutralInnen	List5	rechts.bmp	1	3	480430	3	523	480953
RespPr_MoveS1_150	17	76	rechts	weiblich	154	1	rel	links	List5	links.bmp	1	1	482536	1	385	482921
RespPr_MoveS1_150	17	76	rechts	weiblich	155	1	unrel	rechts	List5	links.bmp	1	1	484496	1	489	484985
RespPr_MoveS1_150	17	76	rechts	weiblich	156	1	unrel	rechts	List5	links.bmp	1	1	486562	1	542	487104
RespPr_MoveS1_150	18	60	rechts	weiblich	1	1	rel	links	List1	links.bmp	1	1	162851	1	1264	164115
RespPr_MoveS1_150	18	60	rechts	weiblich	2	1	rel	links	List1	links.bmp	0	1	165704	3	428	166132
RespPr_MoveS1_150	18	60	rechts	weiblich	3	3	unrel	links	List1	rechts.bmp	1	3	167716	3	696	168412
RespPr_MoveS1_150	18	60	rechts	weiblich	4	3	rel	rechts	List1	rechts.bmp	1	3	169996	3	607	170603
RespPr_MoveS1_150	18	60	rechts	weiblich	5	1	neuAussen	neutralAussen	List1	links.bmp	1	1	172182	1	453	172635
RespPr_MoveS1_150	18	60	rechts	weiblich	6	3	neuInnen	neutralInnen	List1	rechts.bmp	1	3	174208	3	612	174820
RespPr_MoveS1_150	18	60	rechts	weiblich	7	3	unrel	links	List1	rechts.bmp	1	3	176407	3	708	177115
RespPr_MoveS1_150	18	60	rechts	weiblich	8	1	unrel	rechts	List1	links.bmp	1	1	178700	1	519	179219
RespPr_MoveS1_150	18	60	rechts	weiblich	9	3	neuAussen	neutralAussen	List1	rechts.bmp	1	3	180805	3	439	181244
RespPr_MoveS1_150	18	60	rechts	weiblich	10	3	rel	rechts	List1	rechts.bmp	0	3	182831	1	388	183219
RespPr_MoveS1_150	18	60	rechts	weiblich	11	1	neuInnen	neutralInnen	List1	links.bmp	1	1	184804	1	655	185459
RespPr_MoveS1_150	18	60	rechts	weiblich	12	1	unrel	rechts	List1	links.bmp	1	1	187043	1	657	187700
RespPr_MoveS1_150	18	60	rechts	weiblich	13	3	unrel	links	List2	rechts.bmp	0	3	214368	1	379	214747
RespPr_MoveS1_150	18	60	rechts	weiblich	14	1	rel	links	List2	links.bmp	1	1	216314	1	905	217219
RespPr_MoveS1_150	18	60	rechts	weiblich	15	3	rel	rechts	List2	rechts.bmp	1	3	218806	3	550	219356
RespPr_MoveS1_150	18	60	rechts	weiblich	16	3	rel	rechts	List2	rechts.bmp	1	3	220939	3	528	221467
RespPr_MoveS1_150	18	60	rechts	weiblich	17	3	neuAussen	neutralAussen	List2	rechts.bmp	1	3	223045	3	470	223515
RespPr_MoveS1_150	18	60	rechts	weiblich	18	3	unrel	links	List2	rechts.bmp	1	3	225098	3	457	225555
RespPr_MoveS1_150	18	60	rechts	weiblich	19	3	neuInnen	neutralInnen	List2	rechts.bmp	1	3	227137	3	523	227660
RespPr_MoveS1_150	18	60	rechts	weiblich	20	3	neuAussen	neutralAussen	List2	rechts.bmp	1	3	229243	3	464	229707
RespPr_MoveS1_150	18	60	rechts	weiblich	21	1	neuInnen	neutralInnen	List2	links.bmp	1	1	231295	1	381	231676
RespPr_MoveS1_150	18	60	rechts	weiblich	22	1	unrel	rechts	List2	links.bmp	1	1	233255	1	564	233819
RespPr_MoveS1_150	18	60	rechts	weiblich	23	1	neuInnen	neutralInnen	List2	links.bmp	1	1	235401	1	626	236027
RespPr_MoveS1_150	18	60	rechts	weiblich	24	3	neuInnen	neutralInnen	List2	rechts.bmp	1	3	237613	3	462	238075
RespPr_MoveS1_150	18	60	rechts	weiblich	25	3	unrel	links	List2	rechts.bmp	1	3	239653	3	654	240307
RespPr_MoveS1_150	18	60	rechts	weiblich	26	3	neuInnen	neutralInnen	List2	rechts.bmp	1	3	241892	3	511	242403
RespPr_MoveS1_150	18	60	rechts	weiblich	27	1	unrel	rechts	List2	links.bmp	1	1	243985	1	426	244411
RespPr_MoveS1_150	18	60	rechts	weiblich	28	3	rel	rechts	List2	rechts.bmp	1	3	245997	3	518	246515
RespPr_MoveS1_150	18	60	rechts	weiblich	29	1	unrel	rechts	List2	links.bmp	1	1	248103	1	501	248604
RespPr_MoveS1_150	18	60	rechts	weiblich	30	1	unrel	rechts	List2	links.bmp	1	1	250183	1	684	250867
RespPr_MoveS1_150	18	60	rechts	weiblich	31	3	neuAussen	neutralAussen	List2	rechts.bmp	1	3	252448	3	547	252995
RespPr_MoveS1_150	18	60	rechts	weiblich	32	1	unrel	rechts	List2	links.bmp	1	1	254568	1	467	255035
RespPr_MoveS1_150	18	60	rechts	weiblich	33	3	rel	rechts	List2	rechts.bmp	1	3	256620	3	344	256964
RespPr_MoveS1_150	18	60	rechts	weiblich	34	3	rel	rechts	List2	rechts.bmp	1	3	258540	3	423	258963
RespPr_MoveS1_150	18	60	rechts	weiblich	35	3	unrel	links	List2	rechts.bmp	1	3	260552	3	419	260971
RespPr_MoveS1_150	18	60	rechts	weiblich	36	1	rel	links	List2	links.bmp	1	1	262552	1	692	263244
RespPr_MoveS1_150	18	60	rechts	weiblich	37	1	rel	links	List2	links.bmp	1	1	264818	1	530	265348
RespPr_MoveS1_150	18	60	rechts	weiblich	38	3	rel	rechts	List2	rechts.bmp	1	3	266924	3	671	267595
RespPr_MoveS1_150	18	60	rechts	weiblich	39	3	unrel	links	List2	rechts.bmp	1	3	269176	3	515	269691
RespPr_MoveS1_150	18	60	rechts	weiblich	40	1	rel	links	List2	links.bmp	1	1	271269	1	495	271764
RespPr_MoveS1_150	18	60	rechts	weiblich	41	1	unrel	rechts	List2	links.bmp	1	1	273348	1	367	273715
RespPr_MoveS1_150	18	60	rechts	weiblich	42	1	neuAussen	neutralAussen	List2	links.bmp	1	1	275294	1	365	275659
RespPr_MoveS1_150	18	60	rechts	weiblich	43	1	neuInnen	neutralInnen	List2	links.bmp	1	1	277240	1	547	277787
RespPr_MoveS1_150	18	60	rechts	weiblich	44	1	neuAussen	neutralAussen	List2	links.bmp	1	1	279373	1	470	279843
RespPr_MoveS1_150	18	60	rechts	weiblich	45	1	rel	links	List2	links.bmp	1	1	281426	1	625	282051
RespPr_MoveS1_150	18	60	rechts	weiblich	46	1	neuAussen	neutralAussen	List2	links.bmp	1	1	283638	1	382	284020
RespPr_MoveS1_150	18	60	rechts	weiblich	47	1	rel	links	List2	links.bmp	1	1	285597	1	526	286123
RespPr_MoveS1_150	18	60	rechts	weiblich	48	3	unrel	links	List2	rechts.bmp	1	3	287703	3	460	288163
RespPr_MoveS1_150	18	60	rechts	weiblich	49	1	neuInnen	neutralInnen	List3	links.bmp	1	1	294834	1	385	295219
RespPr_MoveS1_150	18	60	rechts	weiblich	50	3	rel	rechts	List3	rechts.bmp	1	3	296794	3	473	297267
RespPr_MoveS1_150	18	60	rechts	weiblich	51	1	rel	links	List3	links.bmp	1	1	298846	1	517	299363
RespPr_MoveS1_150	18	60	rechts	weiblich	52	3	unrel	links	List3	rechts.bmp	1	3	300926	3	622	301548
RespPr_MoveS1_150	18	60	rechts	weiblich	53	1	neuAussen	neutralAussen	List3	links.bmp	1	1	303112	1	380	303492
RespPr_MoveS1_150	18	60	rechts	weiblich	54	3	unrel	links	List3	rechts.bmp	1	3	305058	3	426	305484
RespPr_MoveS1_150	18	60	rechts	weiblich	55	3	neuAussen	neutralAussen	List3	rechts.bmp	1	3	307070	3	430	307500
RespPr_MoveS1_150	18	60	rechts	weiblich	56	1	unrel	rechts	List3	links.bmp	1	1	309070	1	397	309467
RespPr_MoveS1_150	18	60	rechts	weiblich	57	3	rel	rechts	List3	rechts.bmp	1	3	311056	3	459	311515
RespPr_MoveS1_150	18	60	rechts	weiblich	58	3	unrel	links	List3	rechts.bmp	1	3	313082	3	666	313748
RespPr_MoveS1_150	18	60	rechts	weiblich	59	3	neuInnen	neutralInnen	List3	rechts.bmp	1	3	315334	3	469	315803
RespPr_MoveS1_150	18	60	rechts	weiblich	60	1	rel	links	List3	links.bmp	1	1	317387	1	665	318052
RespPr_MoveS1_150	18	60	rechts	weiblich	61	1	unrel	rechts	List3	links.bmp	1	1	319640	1	468	320108
RespPr_MoveS1_150	18	60	rechts	weiblich	62	3	rel	rechts	List3	rechts.bmp	1	3	321692	3	447	322139
RespPr_MoveS1_150	18	60	rechts	weiblich	63	3	unrel	links	List3	rechts.bmp	1	3	323718	3	485	324203
RespPr_MoveS1_150	18	60	rechts	weiblich	64	3	rel	rechts	List3	rechts.bmp	1	3	325784	3	444	326228
RespPr_MoveS1_150	18	60	rechts	weiblich	65	1	rel	links	List3	links.bmp	1	1	327810	1	490	328300
RespPr_MoveS1_150	18	60	rechts	weiblich	66	1	unrel	rechts	List3	links.bmp	1	1	329876	1	479	330355
RespPr_MoveS1_150	18	60	rechts	weiblich	67	1	unrel	rechts	List3	links.bmp	1	1	331942	1	429	332371
RespPr_MoveS1_150	18	60	rechts	weiblich	68	1	neuAussen	neutralAussen	List3	links.bmp	1	1	333955	1	377	334332
RespPr_MoveS1_150	18	60	rechts	weiblich	69	3	neuAussen	neutralAussen	List3	rechts.bmp	1	3	335914	3	545	336459
RespPr_MoveS1_150	18	60	rechts	weiblich	70	3	unrel	links	List3	rechts.bmp	1	3	338047	3	493	338540
RespPr_MoveS1_150	18	60	rechts	weiblich	71	3	unrel	links	List3	rechts.bmp	1	3	340126	3	533	340659
RespPr_MoveS1_150	18	60	rechts	weiblich	72	1	unrel	rechts	List3	links.bmp	1	1	342245	1	606	342851
RespPr_MoveS1_150	18	60	rechts	weiblich	73	3	rel	rechts	List3	rechts.bmp	1	3	344431	3	357	344788
RespPr_MoveS1_150	18	60	rechts	weiblich	74	3	neuInnen	neutralInnen	List3	rechts.bmp	1	3	346351	3	629	346980
RespPr_MoveS1_150	18	60	rechts	weiblich	75	1	unrel	rechts	List3	links.bmp	1	1	348563	1	560	349123
RespPr_MoveS1_150	18	60	rechts	weiblich	76	1	rel	links	List3	links.bmp	1	1	350709	1	727	351436
RespPr_MoveS1_150	18	60	rechts	weiblich	77	1	rel	links	List3	links.bmp	1	1	353015	1	493	353508
RespPr_MoveS1_150	18	60	rechts	weiblich	78	1	neuAussen	neutralAussen	List3	links.bmp	1	1	355095	1	485	355580
RespPr_MoveS1_150	18	60	rechts	weiblich	79	3	neuInnen	neutralInnen	List3	rechts.bmp	1	3	357160	3	580	357740
RespPr_MoveS1_150	18	60	rechts	weiblich	80	3	neuAussen	neutralAussen	List3	rechts.bmp	1	3	359320	3	563	359883
RespPr_MoveS1_150	18	60	rechts	weiblich	81	1	neuInnen	neutralInnen	List3	links.bmp	1	1	361466	1	450	361916
RespPr_MoveS1_150	18	60	rechts	weiblich	82	3	rel	rechts	List3	rechts.bmp	1	3	363492	3	655	364147
RespPr_MoveS1_150	18	60	rechts	weiblich	83	1	rel	links	List3	links.bmp	1	1	365718	1	534	366252
RespPr_MoveS1_150	18	60	rechts	weiblich	84	1	neuInnen	neutralInnen	List3	links.bmp	1	1	367837	1	470	368307
RespPr_MoveS1_150	18	60	rechts	weiblich	85	1	neuAussen	neutralAussen	List4	links.bmp	1	1	444931	1	489	445420
RespPr_MoveS1_150	18	60	rechts	weiblich	86	3	neuInnen	neutralInnen	List4	rechts.bmp	1	3	446997	3	415	447412
RespPr_MoveS1_150	18	60	rechts	weiblich	87	1	rel	links	List4	links.bmp	1	1	448997	1	407	449404
RespPr_MoveS1_150	18	60	rechts	weiblich	88	1	neuInnen	neutralInnen	List4	links.bmp	1	1	450983	1	509	451492
RespPr_MoveS1_150	18	60	rechts	weiblich	89	3	rel	rechts	List4	rechts.bmp	1	3	453075	3	384	453459
RespPr_MoveS1_150	18	60	rechts	weiblich	90	3	neuAussen	neutralAussen	List4	rechts.bmp	1	3	455048	3	420	455468
RespPr_MoveS1_150	18	60	rechts	weiblich	91	1	rel	links	List4	links.bmp	1	1	457047	1	428	457475
RespPr_MoveS1_150	18	60	rechts	weiblich	92	3	unrel	links	List4	rechts.bmp	1	3	459060	3	559	459619
RespPr_MoveS1_150	18	60	rechts	weiblich	93	1	rel	links	List4	links.bmp	1	1	461193	1	450	461643
RespPr_MoveS1_150	18	60	rechts	weiblich	94	3	unrel	links	List4	rechts.bmp	1	3	463219	3	488	463707
RespPr_MoveS1_150	18	60	rechts	weiblich	95	3	rel	rechts	List4	rechts.bmp	1	3	465285	3	695	465980
RespPr_MoveS1_150	18	60	rechts	weiblich	96	3	unrel	links	List4	rechts.bmp	1	3	467564	3	448	468012
RespPr_MoveS1_150	18	60	rechts	weiblich	97	3	neuInnen	neutralInnen	List4	rechts.bmp	1	3	469577	3	410	469987
RespPr_MoveS1_150	18	60	rechts	weiblich	98	3	neuAussen	neutralAussen	List4	rechts.bmp	1	3	471563	3	489	472052
RespPr_MoveS1_150	18	60	rechts	weiblich	99	1	rel	links	List4	links.bmp	1	1	473629	1	527	474156
RespPr_MoveS1_150	18	60	rechts	weiblich	100	3	unrel	links	List4	rechts.bmp	0	3	475735	1	429	476164
RespPr_MoveS1_150	18	60	rechts	weiblich	101	1	rel	links	List4	links.bmp	1	1	477747	1	456	478203
RespPr_MoveS1_150	18	60	rechts	weiblich	102	1	rel	links	List4	links.bmp	1	1	479787	1	529	480316
RespPr_MoveS1_150	18	60	rechts	weiblich	103	1	unrel	rechts	List4	links.bmp	1	1	481893	1	511	482404
RespPr_MoveS1_150	18	60	rechts	weiblich	104	3	rel	rechts	List4	rechts.bmp	1	3	483985	3	426	484411
RespPr_MoveS1_150	18	60	rechts	weiblich	105	3	rel	rechts	List4	rechts.bmp	1	3	485998	3	622	486620
RespPr_MoveS1_150	18	60	rechts	weiblich	106	1	neuAussen	neutralAussen	List4	links.bmp	1	1	488197	1	455	488652
RespPr_MoveS1_150	18	60	rechts	weiblich	107	1	unrel	rechts	List4	links.bmp	1	1	490236	1	415	490651
RespPr_MoveS1_150	18	60	rechts	weiblich	108	1	unrel	rechts	List4	links.bmp	1	1	492236	1	407	492643
RespPr_MoveS1_150	18	60	rechts	weiblich	109	1	unrel	rechts	List4	links.bmp	1	1	494222	1	397	494619
RespPr_MoveS1_150	18	60	rechts	weiblich	110	3	unrel	links	List4	rechts.bmp	1	3	496208	3	772	496980
RespPr_MoveS1_150	18	60	rechts	weiblich	111	1	neuInnen	neutralInnen	List4	links.bmp	1	1	498554	1	538	499092
RespPr_MoveS1_150	18	60	rechts	weiblich	112	3	rel	rechts	List4	rechts.bmp	1	3	500660	3	408	501068
RespPr_MoveS1_150	18	60	rechts	weiblich	113	1	neuInnen	neutralInnen	List4	links.bmp	1	1	502646	1	325	502971
RespPr_MoveS1_150	18	60	rechts	weiblich	114	3	neuInnen	neutralInnen	List4	rechts.bmp	1	3	504552	3	508	505060
RespPr_MoveS1_150	18	60	rechts	weiblich	115	1	unrel	rechts	List4	links.bmp	1	1	506644	1	368	507012
RespPr_MoveS1_150	18	60	rechts	weiblich	116	3	neuAussen	neutralAussen	List4	rechts.bmp	1	3	508590	3	429	509019
RespPr_MoveS1_150	18	60	rechts	weiblich	117	3	unrel	links	List4	rechts.bmp	1	3	510590	3	646	511236
RespPr_MoveS1_150	18	60	rechts	weiblich	118	1	unrel	rechts	List4	links.bmp	1	1	512816	1	516	513332
RespPr_MoveS1_150	18	60	rechts	weiblich	119	3	rel	rechts	List4	rechts.bmp	1	3	514908	3	384	515292
RespPr_MoveS1_150	18	60	rechts	weiblich	120	1	neuAussen	neutralAussen	List4	links.bmp	1	1	516868	1	431	517299
RespPr_MoveS1_150	18	60	rechts	weiblich	121	1	unrel	rechts	List5	links.bmp	1	1	521759	1	581	522340
RespPr_MoveS1_150	18	60	rechts	weiblich	122	3	unrel	links	List5	rechts.bmp	1	3	523919	3	468	524387
RespPr_MoveS1_150	18	60	rechts	weiblich	123	1	unrel	rechts	List5	links.bmp	1	1	525971	1	305	526276
RespPr_MoveS1_150	18	60	rechts	weiblich	124	1	unrel	rechts	List5	links.bmp	1	1	527851	1	489	528340
RespPr_MoveS1_150	18	60	rechts	weiblich	125	1	neuAussen	neutralAussen	List5	links.bmp	1	1	529917	1	518	530435
RespPr_MoveS1_150	18	60	rechts	weiblich	126	1	neuInnen	neutralInnen	List5	links.bmp	1	1	532023	1	364	532387
RespPr_MoveS1_150	18	60	rechts	weiblich	127	1	neuInnen	neutralInnen	List5	links.bmp	1	1	533969	1	363	534332
RespPr_MoveS1_150	18	60	rechts	weiblich	128	1	rel	links	List5	links.bmp	1	1	535915	1	424	536339
RespPr_MoveS1_150	18	60	rechts	weiblich	129	3	rel	rechts	List5	rechts.bmp	1	3	537927	3	356	538283
RespPr_MoveS1_150	18	60	rechts	weiblich	130	3	neuAussen	neutralAussen	List5	rechts.bmp	1	3	539847	3	533	540380
RespPr_MoveS1_150	18	60	rechts	weiblich	131	3	neuAussen	neutralAussen	List5	rechts.bmp	0	3	541953	1	386	542339
RespPr_MoveS1_150	18	60	rechts	weiblich	132	3	unrel	links	List5	rechts.bmp	1	3	543925	3	551	544476
RespPr_MoveS1_150	18	60	rechts	weiblich	133	1	rel	links	List5	links.bmp	1	1	546045	1	567	546612
RespPr_MoveS1_150	18	60	rechts	weiblich	134	1	rel	links	List5	links.bmp	1	1	548191	1	613	548804
RespPr_MoveS1_150	18	60	rechts	weiblich	135	3	unrel	links	List5	rechts.bmp	1	3	550390	3	622	551012
RespPr_MoveS1_150	18	60	rechts	weiblich	136	3	rel	rechts	List5	rechts.bmp	1	3	552589	3	502	553091
RespPr_MoveS1_150	18	60	rechts	weiblich	137	3	unrel	links	List5	rechts.bmp	1	3	554669	3	502	555171
RespPr_MoveS1_150	18	60	rechts	weiblich	138	3	unrel	links	List5	rechts.bmp	1	3	556748	3	448	557196
RespPr_MoveS1_150	18	60	rechts	weiblich	139	3	neuInnen	neutralInnen	List5	rechts.bmp	1	3	558787	3	432	559219
RespPr_MoveS1_150	18	60	rechts	weiblich	140	1	rel	links	List5	links.bmp	1	1	560800	1	515	561315
RespPr_MoveS1_150	18	60	rechts	weiblich	141	3	neuAussen	neutralAussen	List5	rechts.bmp	1	3	562892	3	367	563259
RespPr_MoveS1_150	18	60	rechts	weiblich	142	3	unrel	links	List5	rechts.bmp	0	3	564838	1	358	565196
RespPr_MoveS1_150	18	60	rechts	weiblich	143	1	rel	links	List5	links.bmp	1	1	566785	1	875	567660
RespPr_MoveS1_150	18	60	rechts	weiblich	144	1	neuAussen	neutralAussen	List5	links.bmp	1	1	569224	1	451	569675
RespPr_MoveS1_150	18	60	rechts	weiblich	145	3	neuInnen	neutralInnen	List5	rechts.bmp	1	3	571250	3	497	571747
RespPr_MoveS1_150	18	60	rechts	weiblich	146	1	unrel	rechts	List5	links.bmp	1	1	573316	1	695	574011
RespPr_MoveS1_150	18	60	rechts	weiblich	147	1	rel	links	List5	links.bmp	1	1	575595	1	464	576059
RespPr_MoveS1_150	18	60	rechts	weiblich	148	3	rel	rechts	List5	rechts.bmp	1	3	577648	3	499	578147
RespPr_MoveS1_150	18	60	rechts	weiblich	149	1	neuInnen	neutralInnen	List5	links.bmp	1	1	579727	1	549	580276
RespPr_MoveS1_150	18	60	rechts	weiblich	150	3	rel	rechts	List5	rechts.bmp	1	3	581860	3	544	582404
RespPr_MoveS1_150	18	60	rechts	weiblich	151	1	unrel	rechts	List5	links.bmp	1	1	583992	1	620	584612
RespPr_MoveS1_150	18	60	rechts	weiblich	152	3	neuInnen	neutralInnen	List5	rechts.bmp	1	3	586191	3	517	586708
RespPr_MoveS1_150	18	60	rechts	weiblich	153	1	unrel	rechts	List5	links.bmp	1	1	588271	1	413	588684
RespPr_MoveS1_150	18	60	rechts	weiblich	154	3	rel	rechts	List5	rechts.bmp	1	3	590257	3	378	590635
RespPr_MoveS1_150	18	60	rechts	weiblich	155	3	rel	rechts	List5	rechts.bmp	1	3	592203	3	553	592756
RespPr_MoveS1_150	18	60	rechts	weiblich	156	1	neuAussen	neutralAussen	List5	links.bmp	1	1	594335	1	501	594836
RespPr_MoveS1_150	19	75	rechts	weiblich	1	3	rel	rechts	List1	rechts.bmp	1	3	104666	3	428	105094
RespPr_MoveS1_150	19	75	rechts	weiblich	2	3	neuAussen	neutralAussen	List1	rechts.bmp	1	3	106679	3	519	107198
RespPr_MoveS1_150	19	75	rechts	weiblich	3	3	unrel	links	List1	rechts.bmp	1	3	108785	3	484	109269
RespPr_MoveS1_150	19	75	rechts	weiblich	4	1	neuAussen	neutralAussen	List1	links.bmp	1	1	110851	1	562	111413
RespPr_MoveS1_150	19	75	rechts	weiblich	5	1	rel	links	List1	links.bmp	1	1	112997	1	392	113389
RespPr_MoveS1_150	19	75	rechts	weiblich	6	3	neuInnen	neutralInnen	List1	rechts.bmp	1	3	114969	3	588	115557
RespPr_MoveS1_150	19	75	rechts	weiblich	7	1	neuInnen	neutralInnen	List1	links.bmp	1	1	117129	1	396	117525
RespPr_MoveS1_150	19	75	rechts	weiblich	8	1	unrel	rechts	List1	links.bmp	1	1	119101	1	552	119653
RespPr_MoveS1_150	19	75	rechts	weiblich	9	1	unrel	rechts	List1	links.bmp	1	1	121221	1	529	121750
RespPr_MoveS1_150	19	75	rechts	weiblich	10	3	rel	rechts	List1	rechts.bmp	1	3	123327	3	551	123878
RespPr_MoveS1_150	19	75	rechts	weiblich	11	3	unrel	links	List1	rechts.bmp	1	3	125459	3	539	125998
RespPr_MoveS1_150	19	75	rechts	weiblich	12	1	rel	links	List1	links.bmp	1	1	127579	1	378	127957
RespPr_MoveS1_150	19	75	rechts	weiblich	13	1	unrel	rechts	List2	links.bmp	1	1	146506	1	492	146998
RespPr_MoveS1_150	19	75	rechts	weiblich	14	3	rel	rechts	List2	rechts.bmp	1	3	148572	3	345	148917
RespPr_MoveS1_150	19	75	rechts	weiblich	15	1	unrel	rechts	List2	links.bmp	0	1	150504	3	358	150862
RespPr_MoveS1_150	19	75	rechts	weiblich	16	3	rel	rechts	List2	rechts.bmp	1	3	152450	3	508	152958
RespPr_MoveS1_150	19	75	rechts	weiblich	17	1	neuInnen	neutralInnen	List2	links.bmp	1	1	154530	1	332	154862
RespPr_MoveS1_150	19	75	rechts	weiblich	18	3	unrel	links	List2	rechts.bmp	1	3	156436	3	377	156813
RespPr_MoveS1_150	19	75	rechts	weiblich	19	3	rel	rechts	List2	rechts.bmp	1	3	158382	3	375	158757
RespPr_MoveS1_150	19	75	rechts	weiblich	20	1	rel	links	List2	links.bmp	1	1	160328	1	366	160694
RespPr_MoveS1_150	19	75	rechts	weiblich	21	1	neuAussen	neutralAussen	List2	links.bmp	1	1	162274	1	539	162813
RespPr_MoveS1_150	19	75	rechts	weiblich	22	3	neuInnen	neutralInnen	List2	rechts.bmp	1	3	164380	3	370	164750
RespPr_MoveS1_150	19	75	rechts	weiblich	23	3	rel	rechts	List2	rechts.bmp	1	3	166339	3	370	166709
RespPr_MoveS1_150	19	75	rechts	weiblich	24	3	unrel	links	List2	rechts.bmp	1	3	168285	3	545	168830
RespPr_MoveS1_150	19	75	rechts	weiblich	25	3	neuAussen	neutralAussen	List2	rechts.bmp	1	3	170418	3	372	170790
RespPr_MoveS1_150	19	75	rechts	weiblich	26	1	rel	links	List2	links.bmp	1	1	172377	1	365	172742
RespPr_MoveS1_150	19	75	rechts	weiblich	27	3	unrel	links	List2	rechts.bmp	1	3	174323	3	403	174726
RespPr_MoveS1_150	19	75	rechts	weiblich	28	1	unrel	rechts	List2	links.bmp	1	1	176309	1	360	176669
RespPr_MoveS1_150	19	75	rechts	weiblich	29	1	neuInnen	neutralInnen	List2	links.bmp	1	1	178255	1	551	178806
RespPr_MoveS1_150	19	75	rechts	weiblich	30	1	rel	links	List2	links.bmp	1	1	180388	1	482	180870
RespPr_MoveS1_150	19	75	rechts	weiblich	31	1	rel	links	List2	links.bmp	1	1	182454	1	344	182798
RespPr_MoveS1_150	19	75	rechts	weiblich	32	3	unrel	links	List2	rechts.bmp	1	3	184386	3	548	184934
RespPr_MoveS1_150	19	75	rechts	weiblich	33	3	rel	rechts	List2	rechts.bmp	1	3	186519	3	407	186926
RespPr_MoveS1_150	19	75	rechts	weiblich	34	1	unrel	rechts	List2	links.bmp	1	1	188505	1	508	189013
RespPr_MoveS1_150	19	75	rechts	weiblich	35	3	unrel	links	List2	rechts.bmp	1	3	190598	3	335	190933
RespPr_MoveS1_150	19	75	rechts	weiblich	36	1	rel	links	List2	links.bmp	1	1	192517	1	384	192901
RespPr_MoveS1_150	19	75	rechts	weiblich	37	3	neuInnen	neutralInnen	List2	rechts.bmp	1	3	194490	3	436	194926
RespPr_MoveS1_150	19	75	rechts	weiblich	38	3	rel	rechts	List2	rechts.bmp	1	3	196502	3	423	196925
RespPr_MoveS1_150	19	75	rechts	weiblich	39	1	neuInnen	neutralInnen	List2	links.bmp	1	1	198502	1	391	198893
RespPr_MoveS1_150	19	75	rechts	weiblich	40	1	unrel	rechts	List2	links.bmp	1	1	200475	1	442	200917
RespPr_MoveS1_150	19	75	rechts	weiblich	41	1	rel	links	List2	links.bmp	1	1	202501	1	417	202918
RespPr_MoveS1_150	19	75	rechts	weiblich	42	3	unrel	links	List2	rechts.bmp	0	3	204500	1	282	204782
RespPr_MoveS1_150	19	75	rechts	weiblich	43	3	neuAussen	neutralAussen	List2	rechts.bmp	1	3	206366	3	400	206766
RespPr_MoveS1_150	19	75	rechts	weiblich	44	3	neuAussen	neutralAussen	List2	rechts.bmp	1	3	208352	3	437	208789
RespPr_MoveS1_150	19	75	rechts	weiblich	45	1	unrel	rechts	List2	links.bmp	1	1	210378	1	395	210773
RespPr_MoveS1_150	19	75	rechts	weiblich	46	1	neuAussen	neutralAussen	List2	links.bmp	1	1	212351	1	422	212773
RespPr_MoveS1_150	19	75	rechts	weiblich	47	1	neuAussen	neutralAussen	List2	links.bmp	1	1	214350	1	408	214758
RespPr_MoveS1_150	19	75	rechts	weiblich	48	3	neuInnen	neutralInnen	List2	rechts.bmp	1	3	216336	3	358	216694
RespPr_MoveS1_150	19	75	rechts	weiblich	49	1	neuAussen	neutralAussen	List3	links.bmp	1	1	223560	1	478	224038
RespPr_MoveS1_150	19	75	rechts	weiblich	50	3	neuInnen	neutralInnen	List3	rechts.bmp	1	3	225626	3	372	225998
RespPr_MoveS1_150	19	75	rechts	weiblich	51	1	neuInnen	neutralInnen	List3	links.bmp	1	1	227586	1	380	227966
RespPr_MoveS1_150	19	75	rechts	weiblich	52	1	unrel	rechts	List3	links.bmp	1	1	229545	1	461	230006
RespPr_MoveS1_150	19	75	rechts	weiblich	53	1	rel	links	List3	links.bmp	1	1	231584	1	406	231990
RespPr_MoveS1_150	19	75	rechts	weiblich	54	1	rel	links	List3	links.bmp	1	1	233570	1	315	233885
RespPr_MoveS1_150	19	75	rechts	weiblich	55	3	unrel	links	List3	rechts.bmp	1	3	235463	3	518	235981
RespPr_MoveS1_150	19	75	rechts	weiblich	56	3	rel	rechts	List3	rechts.bmp	1	3	237569	3	492	238061
RespPr_MoveS1_150	19	75	rechts	weiblich	57	1	neuAussen	neutralAussen	List3	links.bmp	1	1	239648	1	334	239982
RespPr_MoveS1_150	19	75	rechts	weiblich	58	3	rel	rechts	List3	rechts.bmp	1	3	241568	3	534	242102
RespPr_MoveS1_150	19	75	rechts	weiblich	59	1	unrel	rechts	List3	links.bmp	1	1	243687	1	406	244093
RespPr_MoveS1_150	19	75	rechts	weiblich	60	1	unrel	rechts	List3	links.bmp	1	1	245673	1	349	246022
RespPr_MoveS1_150	19	75	rechts	weiblich	61	3	unrel	links	List3	rechts.bmp	1	3	247606	3	368	247974
RespPr_MoveS1_150	19	75	rechts	weiblich	62	3	unrel	links	List3	rechts.bmp	1	3	249552	3	429	249981
RespPr_MoveS1_150	19	75	rechts	weiblich	63	1	unrel	rechts	List3	links.bmp	1	1	251564	1	306	251870
RespPr_MoveS1_150	19	75	rechts	weiblich	64	1	neuAussen	neutralAussen	List3	links.bmp	1	1	253457	1	373	253830
RespPr_MoveS1_150	19	75	rechts	weiblich	65	1	rel	links	List3	links.bmp	1	1	255416	1	350	255766
RespPr_MoveS1_150	19	75	rechts	weiblich	66	3	rel	rechts	List3	rechts.bmp	1	3	257336	3	365	257701
RespPr_MoveS1_150	19	75	rechts	weiblich	67	3	rel	rechts	List3	rechts.bmp	1	3	259282	3	491	259773
RespPr_MoveS1_150	19	75	rechts	weiblich	68	1	rel	links	List3	links.bmp	1	1	261348	1	338	261686
RespPr_MoveS1_150	19	75	rechts	weiblich	69	3	rel	rechts	List3	rechts.bmp	1	3	263254	3	384	263638
RespPr_MoveS1_150	19	75	rechts	weiblich	70	3	neuAussen	neutralAussen	List3	rechts.bmp	1	3	265226	3	491	265717
RespPr_MoveS1_150	19	75	rechts	weiblich	71	3	neuAussen	neutralAussen	List3	rechts.bmp	1	3	267306	3	395	267701
RespPr_MoveS1_150	19	75	rechts	weiblich	72	1	unrel	rechts	List3	links.bmp	1	1	269292	1	362	269654
RespPr_MoveS1_150	19	75	rechts	weiblich	73	1	unrel	rechts	List3	links.bmp	1	1	271238	1	456	271694
RespPr_MoveS1_150	19	75	rechts	weiblich	74	3	rel	rechts	List3	rechts.bmp	1	3	273264	3	454	273718
RespPr_MoveS1_150	19	75	rechts	weiblich	75	1	neuInnen	neutralInnen	List3	links.bmp	1	1	275290	1	299	275589
RespPr_MoveS1_150	19	75	rechts	weiblich	76	1	rel	links	List3	links.bmp	1	1	277169	1	381	277550
RespPr_MoveS1_150	19	75	rechts	weiblich	77	3	unrel	links	List3	rechts.bmp	1	3	279128	3	461	279589
RespPr_MoveS1_150	19	75	rechts	weiblich	78	3	unrel	links	List3	rechts.bmp	1	3	281168	3	486	281654
RespPr_MoveS1_150	19	75	rechts	weiblich	79	3	neuInnen	neutralInnen	List3	rechts.bmp	1	3	283234	3	404	283638
RespPr_MoveS1_150	19	75	rechts	weiblich	80	3	neuInnen	neutralInnen	List3	rechts.bmp	1	3	285220	3	418	285638
RespPr_MoveS1_150	19	75	rechts	weiblich	81	3	neuAussen	neutralAussen	List3	rechts.bmp	1	3	287219	3	363	287582
RespPr_MoveS1_150	19	75	rechts	weiblich	82	1	neuInnen	neutralInnen	List3	links.bmp	1	1	289165	1	353	289518
RespPr_MoveS1_150	19	75	rechts	weiblich	83	3	unrel	links	List3	rechts.bmp	1	3	291098	3	404	291502
RespPr_MoveS1_150	19	75	rechts	weiblich	84	1	rel	links	List3	links.bmp	1	1	293084	1	409	293493
RespPr_MoveS1_150	19	75	rechts	weiblich	85	1	unrel	rechts	List4	links.bmp	1	1	301934	1	496	302430
RespPr_MoveS1_150	19	75	rechts	weiblich	86	3	rel	rechts	List4	rechts.bmp	1	3	304014	3	375	304389
RespPr_MoveS1_150	19	75	rechts	weiblich	87	1	rel	links	List4	links.bmp	1	1	305973	1	408	306381
RespPr_MoveS1_150	19	75	rechts	weiblich	88	3	rel	rechts	List4	rechts.bmp	1	3	307959	3	319	308278
RespPr_MoveS1_150	19	75	rechts	weiblich	89	3	neuAussen	neutralAussen	List4	rechts.bmp	1	3	309852	3	497	310349
RespPr_MoveS1_150	19	75	rechts	weiblich	90	3	neuInnen	neutralInnen	List4	rechts.bmp	1	3	311918	3	424	312342
RespPr_MoveS1_150	19	75	rechts	weiblich	91	1	rel	links	List4	links.bmp	1	1	313930	1	475	314405
RespPr_MoveS1_150	19	75	rechts	weiblich	92	3	rel	rechts	List4	rechts.bmp	1	3	315983	3	326	316309
RespPr_MoveS1_150	19	75	rechts	weiblich	93	3	unrel	links	List4	rechts.bmp	1	3	317876	3	425	318301
RespPr_MoveS1_150	19	75	rechts	weiblich	94	1	neuAussen	neutralAussen	List4	links.bmp	1	1	319888	1	422	320310
RespPr_MoveS1_150	19	75	rechts	weiblich	95	1	rel	links	List4	links.bmp	1	1	321888	1	494	322382
RespPr_MoveS1_150	19	75	rechts	weiblich	96	3	neuAussen	neutralAussen	List4	rechts.bmp	1	3	323954	3	347	324301
RespPr_MoveS1_150	19	75	rechts	weiblich	97	1	neuAussen	neutralAussen	List4	links.bmp	1	1	325886	1	295	326181
RespPr_MoveS1_150	19	75	rechts	weiblich	98	3	unrel	links	List4	rechts.bmp	1	3	327766	3	352	328118
RespPr_MoveS1_150	19	75	rechts	weiblich	99	1	unrel	rechts	List4	links.bmp	1	1	329698	1	419	330117
RespPr_MoveS1_150	19	75	rechts	weiblich	100	3	unrel	links	List4	rechts.bmp	1	3	331698	3	427	332125
RespPr_MoveS1_150	19	75	rechts	weiblich	101	1	rel	links	List4	links.bmp	1	1	333710	1	360	334070
RespPr_MoveS1_150	19	75	rechts	weiblich	102	1	neuInnen	neutralInnen	List4	links.bmp	1	1	335656	1	414	336070
RespPr_MoveS1_150	19	75	rechts	weiblich	103	3	neuAussen	neutralAussen	List4	rechts.bmp	1	3	337656	3	429	338085
RespPr_MoveS1_150	19	75	rechts	weiblich	104	1	unrel	rechts	List4	links.bmp	1	1	339668	1	386	340054
RespPr_MoveS1_150	19	75	rechts	weiblich	105	1	neuInnen	neutralInnen	List4	links.bmp	1	1	341641	1	365	342006
RespPr_MoveS1_150	19	75	rechts	weiblich	106	1	unrel	rechts	List4	links.bmp	1	1	343587	1	426	344013
RespPr_MoveS1_150	19	75	rechts	weiblich	107	3	rel	rechts	List4	rechts.bmp	1	3	345600	3	437	346037
RespPr_MoveS1_150	19	75	rechts	weiblich	108	3	rel	rechts	List4	rechts.bmp	1	3	347626	3	460	348086
RespPr_MoveS1_150	19	75	rechts	weiblich	109	3	unrel	links	List4	rechts.bmp	1	3	349665	3	509	350174
RespPr_MoveS1_150	19	75	rechts	weiblich	110	1	rel	links	List4	links.bmp	1	1	351758	1	488	352246
RespPr_MoveS1_150	19	75	rechts	weiblich	111	3	unrel	links	List4	rechts.bmp	1	3	353824	3	422	354246
RespPr_MoveS1_150	19	75	rechts	weiblich	112	3	rel	rechts	List4	rechts.bmp	1	3	355823	3	487	356310
RespPr_MoveS1_150	19	75	rechts	weiblich	113	1	rel	links	List4	links.bmp	1	1	357876	1	497	358373
RespPr_MoveS1_150	19	75	rechts	weiblich	114	1	unrel	rechts	List4	links.bmp	1	1	359942	1	447	360389
RespPr_MoveS1_150	19	75	rechts	weiblich	115	1	unrel	rechts	List4	links.bmp	1	1	361968	1	437	362405
RespPr_MoveS1_150	19	75	rechts	weiblich	116	3	neuInnen	neutralInnen	List4	rechts.bmp	1	3	363994	3	324	364318
RespPr_MoveS1_150	19	75	rechts	weiblich	117	3	neuInnen	neutralInnen	List4	rechts.bmp	1	3	365900	3	450	366350
RespPr_MoveS1_150	19	75	rechts	weiblich	118	3	unrel	links	List4	rechts.bmp	1	3	367939	3	563	368502
RespPr_MoveS1_150	19	75	rechts	weiblich	119	1	neuInnen	neutralInnen	List4	links.bmp	1	1	370072	1	518	370590
RespPr_MoveS1_150	19	75	rechts	weiblich	120	1	neuAussen	neutralAussen	List4	links.bmp	1	1	372178	1	403	372581
RespPr_MoveS1_150	19	75	rechts	weiblich	121	1	neuAussen	neutralAussen	List5	links.bmp	1	1	380148	1	538	380686
RespPr_MoveS1_150	19	75	rechts	weiblich	122	3	rel	rechts	List5	rechts.bmp	1	3	382268	3	377	382645
RespPr_MoveS1_150	19	75	rechts	weiblich	123	1	neuInnen	neutralInnen	List5	links.bmp	1	1	384214	1	343	384557
RespPr_MoveS1_150	19	75	rechts	weiblich	124	3	unrel	links	List5	rechts.bmp	1	3	386146	3	468	386614
RespPr_MoveS1_150	19	75	rechts	weiblich	125	1	unrel	rechts	List5	links.bmp	1	1	388186	1	436	388622
RespPr_MoveS1_150	19	75	rechts	weiblich	126	1	rel	links	List5	links.bmp	1	1	390198	1	471	390669
RespPr_MoveS1_150	19	75	rechts	weiblich	127	1	rel	links	List5	links.bmp	1	1	392238	1	391	392629
RespPr_MoveS1_150	19	75	rechts	weiblich	128	1	unrel	rechts	List5	links.bmp	1	1	394210	1	435	394645
RespPr_MoveS1_150	19	75	rechts	weiblich	129	1	unrel	rechts	List5	links.bmp	1	1	396210	1	427	396637
RespPr_MoveS1_150	19	75	rechts	weiblich	130	3	rel	rechts	List5	rechts.bmp	1	3	398222	3	352	398574
RespPr_MoveS1_150	19	75	rechts	weiblich	131	1	rel	links	List5	links.bmp	1	1	400155	1	290	400445
RespPr_MoveS1_150	19	75	rechts	weiblich	132	3	neuAussen	neutralAussen	List5	rechts.bmp	1	3	402035	3	394	402429
RespPr_MoveS1_150	19	75	rechts	weiblich	133	3	neuAussen	neutralAussen	List5	rechts.bmp	1	3	404007	3	455	404462
RespPr_MoveS1_150	19	75	rechts	weiblich	134	3	neuAussen	neutralAussen	List5	rechts.bmp	1	3	406047	3	383	406430
RespPr_MoveS1_150	19	75	rechts	weiblich	135	3	rel	rechts	List5	rechts.bmp	1	3	408006	3	447	408453
RespPr_MoveS1_150	19	75	rechts	weiblich	136	1	neuAussen	neutralAussen	List5	links.bmp	1	1	410032	1	429	410461
RespPr_MoveS1_150	19	75	rechts	weiblich	137	1	rel	links	List5	links.bmp	1	1	412045	1	384	412429
RespPr_MoveS1_150	19	75	rechts	weiblich	138	3	neuInnen	neutralInnen	List5	rechts.bmp	1	3	414017	3	420	414437
RespPr_MoveS1_150	19	75	rechts	weiblich	139	3	neuInnen	neutralInnen	List5	rechts.bmp	1	3	416017	3	420	416437
RespPr_MoveS1_150	19	75	rechts	weiblich	140	3	rel	rechts	List5	rechts.bmp	1	3	418016	3	389	418405
RespPr_MoveS1_150	19	75	rechts	weiblich	141	3	unrel	links	List5	rechts.bmp	1	3	419989	3	432	420421
RespPr_MoveS1_150	19	75	rechts	weiblich	142	1	neuInnen	neutralInnen	List5	links.bmp	1	1	422001	1	476	422477
RespPr_MoveS1_150	19	75	rechts	weiblich	143	1	neuAussen	neutralAussen	List5	links.bmp	1	1	424054	1	416	424470
RespPr_MoveS1_150	19	75	rechts	weiblich	144	1	unrel	rechts	List5	links.bmp	1	1	426053	1	400	426453
RespPr_MoveS1_150	19	75	rechts	weiblich	145	3	unrel	links	List5	rechts.bmp	1	3	428039	3	558	428597
RespPr_MoveS1_150	19	75	rechts	weiblich	146	3	neuInnen	neutralInnen	List5	rechts.bmp	1	3	430185	3	365	430550
RespPr_MoveS1_150	19	75	rechts	weiblich	147	3	unrel	links	List5	rechts.bmp	1	3	432131	3	355	432486
RespPr_MoveS1_150	19	75	rechts	weiblich	148	3	rel	rechts	List5	rechts.bmp	1	3	434064	3	437	434501
RespPr_MoveS1_150	19	75	rechts	weiblich	149	3	unrel	links	List5	rechts.bmp	1	3	436090	3	460	436550
RespPr_MoveS1_150	19	75	rechts	weiblich	150	1	rel	links	List5	links.bmp	1	1	438129	1	516	438645
RespPr_MoveS1_150	19	75	rechts	weiblich	151	1	unrel	rechts	List5	links.bmp	1	1	440222	1	456	440678
RespPr_MoveS1_150	19	75	rechts	weiblich	152	3	unrel	links	List5	rechts.bmp	1	3	442261	3	385	442646
RespPr_MoveS1_150	19	75	rechts	weiblich	153	1	unrel	rechts	List5	links.bmp	1	1	444234	1	524	444758
RespPr_MoveS1_150	19	75	rechts	weiblich	154	1	rel	links	List5	links.bmp	1	1	446340	1	426	446766
RespPr_MoveS1_150	19	75	rechts	weiblich	155	1	neuInnen	neutralInnen	List5	links.bmp	1	1	448353	1	437	448790
RespPr_MoveS1_150	19	75	rechts	weiblich	156	3	rel	rechts	List5	rechts.bmp	1	3	450379	3	347	450726
RespPr_MoveS1_150	1	68	rechts	maennlich	1	3	neuAussen	neutralAussen	List1	rechts.bmp	1	3	149711	3	783	150494
RespPr_MoveS1_150	1	68	rechts	maennlich	2	3	rel	rechts	List1	rechts.bmp	1	3	152070	3	1048	153118
RespPr_MoveS1_150	1	68	rechts	maennlich	3	1	neuInnen	neutralInnen	List1	links.bmp	1	1	154722	1	868	155590
RespPr_MoveS1_150	1	68	rechts	maennlich	4	3	unrel	links	List1	rechts.bmp	1	3	157175	3	839	158014
RespPr_MoveS1_150	1	68	rechts	maennlich	5	1	rel	links	List1	links.bmp	1	1	159601	1	645	160246
RespPr_MoveS1_150	1	68	rechts	maennlich	6	3	unrel	links	List1	rechts.bmp	1	3	161827	3	571	162398
RespPr_MoveS1_150	1	68	rechts	maennlich	7	3	neuInnen	neutralInnen	List1	rechts.bmp	1	3	163986	3	749	164735
RespPr_MoveS1_150	1	68	rechts	maennlich	8	1	rel	links	List1	links.bmp	1	1	166318	1	880	167198
RespPr_MoveS1_150	1	68	rechts	maennlich	9	1	unrel	rechts	List1	links.bmp	1	1	168784	1	622	169406
RespPr_MoveS1_150	1	68	rechts	maennlich	10	3	rel	rechts	List1	rechts.bmp	1	3	170984	3	814	171798
RespPr_MoveS1_150	1	68	rechts	maennlich	11	1	neuAussen	neutralAussen	List1	links.bmp	1	1	173383	1	631	174014
RespPr_MoveS1_150	1	68	rechts	maennlich	12	1	unrel	rechts	List1	links.bmp	1	1	175595	1	747	176342
RespPr_MoveS1_150	1	68	rechts	maennlich	13	3	rel	rechts	List2	rechts.bmp	1	3	258475	3	659	259134
RespPr_MoveS1_150	1	68	rechts	maennlich	14	3	unrel	links	List2	rechts.bmp	1	3	260714	3	532	261246
RespPr_MoveS1_150	1	68	rechts	maennlich	15	3	rel	rechts	List2	rechts.bmp	1	3	262833	3	509	263342
RespPr_MoveS1_150	1	68	rechts	maennlich	16	3	neuAussen	neutralAussen	List2	rechts.bmp	1	3	264926	3	496	265422
RespPr_MoveS1_150	1	68	rechts	maennlich	17	1	neuAussen	neutralAussen	List2	links.bmp	1	1	267005	1	825	267830
RespPr_MoveS1_150	1	68	rechts	maennlich	18	1	rel	links	List2	links.bmp	1	1	269418	1	532	269950
RespPr_MoveS1_150	1	68	rechts	maennlich	19	3	unrel	links	List2	rechts.bmp	1	3	271524	3	689	272213
RespPr_MoveS1_150	1	68	rechts	maennlich	20	1	neuInnen	neutralInnen	List2	links.bmp	1	1	273790	1	647	274437
RespPr_MoveS1_150	1	68	rechts	maennlich	21	1	neuInnen	neutralInnen	List2	links.bmp	1	1	276016	1	630	276646
RespPr_MoveS1_150	1	68	rechts	maennlich	22	1	unrel	rechts	List2	links.bmp	1	1	278228	1	562	278790
RespPr_MoveS1_150	1	68	rechts	maennlich	23	1	neuAussen	neutralAussen	List2	links.bmp	1	1	280361	1	517	280878
RespPr_MoveS1_150	1	68	rechts	maennlich	24	3	neuAussen	neutralAussen	List2	rechts.bmp	1	3	282467	3	596	283063
RespPr_MoveS1_150	1	68	rechts	maennlich	25	3	unrel	links	List2	rechts.bmp	1	3	284639	3	535	285174
RespPr_MoveS1_150	1	68	rechts	maennlich	26	3	rel	rechts	List2	rechts.bmp	1	3	286759	3	614	287373
RespPr_MoveS1_150	1	68	rechts	maennlich	27	1	unrel	rechts	List2	links.bmp	1	1	288958	1	704	289662
RespPr_MoveS1_150	1	68	rechts	maennlich	28	3	unrel	links	List2	rechts.bmp	1	3	291250	3	604	291854
RespPr_MoveS1_150	1	68	rechts	maennlich	29	3	unrel	links	List2	rechts.bmp	1	3	293436	3	562	293998
RespPr_MoveS1_150	1	68	rechts	maennlich	30	1	rel	links	List2	links.bmp	1	1	295582	1	584	296166
RespPr_MoveS1_150	1	68	rechts	maennlich	31	3	neuInnen	neutralInnen	List2	rechts.bmp	1	3	297742	3	569	298311
RespPr_MoveS1_150	1	68	rechts	maennlich	32	3	rel	rechts	List2	rechts.bmp	1	3	299888	3	542	300430
RespPr_MoveS1_150	1	68	rechts	maennlich	33	3	neuInnen	neutralInnen	List2	rechts.bmp	1	3	302007	3	487	302494
RespPr_MoveS1_150	1	68	rechts	maennlich	34	1	neuAussen	neutralAussen	List2	links.bmp	1	1	304073	1	669	304742
RespPr_MoveS1_150	1	68	rechts	maennlich	35	1	rel	links	List2	links.bmp	1	1	306326	1	527	306853
RespPr_MoveS1_150	1	68	rechts	maennlich	36	3	neuAussen	neutralAussen	List2	rechts.bmp	1	3	308431	3	590	309021
RespPr_MoveS1_150	1	68	rechts	maennlich	37	1	rel	links	List2	links.bmp	1	1	310591	1	511	311102
RespPr_MoveS1_150	1	68	rechts	maennlich	38	3	rel	rechts	List2	rechts.bmp	1	3	312683	3	595	313278
RespPr_MoveS1_150	1	68	rechts	maennlich	39	1	neuInnen	neutralInnen	List2	links.bmp	1	1	314843	1	475	315318
RespPr_MoveS1_150	1	68	rechts	maennlich	40	1	rel	links	List2	links.bmp	1	1	316895	1	615	317510
RespPr_MoveS1_150	1	68	rechts	maennlich	41	1	unrel	rechts	List2	links.bmp	1	1	319095	1	503	319598
RespPr_MoveS1_150	1	68	rechts	maennlich	42	1	unrel	rechts	List2	links.bmp	1	1	321187	1	515	321702
RespPr_MoveS1_150	1	68	rechts	maennlich	43	3	rel	rechts	List2	rechts.bmp	1	3	323280	3	598	323878
RespPr_MoveS1_150	1	68	rechts	maennlich	44	1	unrel	rechts	List2	links.bmp	1	1	325466	1	620	326086
RespPr_MoveS1_150	1	68	rechts	maennlich	45	1	rel	links	List2	links.bmp	1	1	327652	1	490	328142
RespPr_MoveS1_150	1	68	rechts	maennlich	46	3	unrel	links	List2	rechts.bmp	1	3	329718	3	496	330214
RespPr_MoveS1_150	1	68	rechts	maennlich	47	1	unrel	rechts	List2	links.bmp	1	1	331784	1	510	332294
RespPr_MoveS1_150	1	68	rechts	maennlich	48	3	neuInnen	neutralInnen	List2	rechts.bmp	1	3	333876	3	498	334374
RespPr_MoveS1_150	1	68	rechts	maennlich	49	1	rel	links	List3	links.bmp	1	1	342114	1	740	342854
RespPr_MoveS1_150	1	68	rechts	maennlich	50	1	unrel	rechts	List3	links.bmp	1	1	344433	1	621	345054
RespPr_MoveS1_150	1	68	rechts	maennlich	51	3	unrel	links	List3	rechts.bmp	1	3	346632	3	598	347230
RespPr_MoveS1_150	1	68	rechts	maennlich	52	3	neuAussen	neutralAussen	List3	rechts.bmp	1	3	348805	3	578	349383
RespPr_MoveS1_150	1	68	rechts	maennlich	53	1	neuAussen	neutralAussen	List3	links.bmp	1	1	350951	1	783	351734
RespPr_MoveS1_150	1	68	rechts	maennlich	54	1	rel	links	List3	links.bmp	1	1	353310	1	584	353894
RespPr_MoveS1_150	1	68	rechts	maennlich	55	1	neuAussen	neutralAussen	List3	links.bmp	1	1	355483	1	547	356030
RespPr_MoveS1_150	1	68	rechts	maennlich	56	3	rel	rechts	List3	rechts.bmp	1	3	357615	3	575	358190
RespPr_MoveS1_150	1	68	rechts	maennlich	57	3	unrel	links	List3	rechts.bmp	1	3	359774	3	503	360277
RespPr_MoveS1_150	1	68	rechts	maennlich	58	1	unrel	rechts	List3	links.bmp	1	1	361854	1	497	362351
RespPr_MoveS1_150	1	68	rechts	maennlich	59	1	rel	links	List3	links.bmp	1	1	363920	1	510	364430
RespPr_MoveS1_150	1	68	rechts	maennlich	60	3	neuAussen	neutralAussen	List3	rechts.bmp	1	3	366012	3	642	366654
RespPr_MoveS1_150	1	68	rechts	maennlich	61	3	rel	rechts	List3	rechts.bmp	1	3	368238	3	568	368806
RespPr_MoveS1_150	1	68	rechts	maennlich	62	3	rel	rechts	List3	rechts.bmp	1	3	370384	3	582	370966
RespPr_MoveS1_150	1	68	rechts	maennlich	63	1	unrel	rechts	List3	links.bmp	1	1	372544	1	678	373222
RespPr_MoveS1_150	1	68	rechts	maennlich	64	3	neuInnen	neutralInnen	List3	rechts.bmp	1	3	374810	3	548	375358
RespPr_MoveS1_150	1	68	rechts	maennlich	65	1	neuInnen	neutralInnen	List3	links.bmp	1	1	376942	1	575	377517
RespPr_MoveS1_150	1	68	rechts	maennlich	66	3	neuInnen	neutralInnen	List3	rechts.bmp	1	3	379101	3	505	379606
RespPr_MoveS1_150	1	68	rechts	maennlich	67	3	neuAussen	neutralAussen	List3	rechts.bmp	1	3	381181	3	521	381702
RespPr_MoveS1_150	1	68	rechts	maennlich	68	3	rel	rechts	List3	rechts.bmp	1	3	383287	3	663	383950
RespPr_MoveS1_150	1	68	rechts	maennlich	69	1	rel	links	List3	links.bmp	1	1	385513	1	605	386118
RespPr_MoveS1_150	1	68	rechts	maennlich	70	1	neuInnen	neutralInnen	List3	links.bmp	1	1	387699	1	498	388197
RespPr_MoveS1_150	1	68	rechts	maennlich	71	3	unrel	links	List3	rechts.bmp	1	3	389778	3	476	390254
RespPr_MoveS1_150	1	68	rechts	maennlich	72	1	rel	links	List3	links.bmp	1	1	391831	1	527	392358
RespPr_MoveS1_150	1	68	rechts	maennlich	73	1	unrel	rechts	List3	links.bmp	1	1	393937	1	733	394670
RespPr_MoveS1_150	1	68	rechts	maennlich	74	3	rel	rechts	List3	rechts.bmp	1	3	396256	3	646	396902
RespPr_MoveS1_150	1	68	rechts	maennlich	75	3	unrel	links	List3	rechts.bmp	1	3	398482	3	532	399014
RespPr_MoveS1_150	1	68	rechts	maennlich	76	1	unrel	rechts	List3	links.bmp	1	1	400588	1	682	401270
RespPr_MoveS1_150	1	68	rechts	maennlich	77	3	unrel	links	List3	rechts.bmp	1	3	402854	3	631	403485
RespPr_MoveS1_150	1	68	rechts	maennlich	78	1	rel	links	List3	links.bmp	1	1	405066	1	564	405630
RespPr_MoveS1_150	1	68	rechts	maennlich	79	1	neuInnen	neutralInnen	List3	links.bmp	1	1	407212	1	770	407982
RespPr_MoveS1_150	1	68	rechts	maennlich	80	1	neuAussen	neutralAussen	List3	links.bmp	1	1	409571	1	676	410247
RespPr_MoveS1_150	1	68	rechts	maennlich	81	1	unrel	rechts	List3	links.bmp	1	1	411824	1	646	412470
RespPr_MoveS1_150	1	68	rechts	maennlich	82	3	neuInnen	neutralInnen	List3	rechts.bmp	1	3	414050	3	644	414694
RespPr_MoveS1_150	1	68	rechts	maennlich	83	3	rel	rechts	List3	rechts.bmp	1	3	416276	3	570	416846
RespPr_MoveS1_150	1	68	rechts	maennlich	84	3	unrel	links	List3	rechts.bmp	1	3	418422	3	536	418958
RespPr_MoveS1_150	1	68	rechts	maennlich	85	1	rel	links	List4	links.bmp	1	1	423247	1	943	424190
RespPr_MoveS1_150	1	68	rechts	maennlich	86	1	unrel	rechts	List4	links.bmp	1	1	425753	1	661	426414
RespPr_MoveS1_150	1	68	rechts	maennlich	87	1	unrel	rechts	List4	links.bmp	1	1	427992	1	582	428574
RespPr_MoveS1_150	1	68	rechts	maennlich	88	1	rel	links	List4	links.bmp	1	1	430151	1	551	430702
RespPr_MoveS1_150	1	68	rechts	maennlich	89	1	neuAussen	neutralAussen	List4	links.bmp	1	1	432284	1	529	432813
RespPr_MoveS1_150	1	68	rechts	maennlich	90	3	rel	rechts	List4	rechts.bmp	1	3	434390	3	624	435014
RespPr_MoveS1_150	1	68	rechts	maennlich	91	3	unrel	links	List4	rechts.bmp	1	3	436602	3	644	437246
RespPr_MoveS1_150	1	68	rechts	maennlich	92	1	rel	links	List4	links.bmp	1	1	438828	1	626	439454
RespPr_MoveS1_150	1	68	rechts	maennlich	93	3	unrel	links	List4	rechts.bmp	1	3	441041	3	525	441566
RespPr_MoveS1_150	1	68	rechts	maennlich	94	3	neuInnen	neutralInnen	List4	rechts.bmp	1	3	443147	3	643	443790
RespPr_MoveS1_150	1	68	rechts	maennlich	95	3	rel	rechts	List4	rechts.bmp	1	3	445373	3	514	445887
RespPr_MoveS1_150	1	68	rechts	maennlich	96	3	unrel	links	List4	rechts.bmp	1	3	447465	3	501	447966
RespPr_MoveS1_150	1	68	rechts	maennlich	97	1	neuInnen	neutralInnen	List4	links.bmp	1	1	449545	1	829	450374
RespPr_MoveS1_150	1	68	rechts	maennlich	98	3	neuInnen	neutralInnen	List4	rechts.bmp	1	3	451957	3	697	452654
RespPr_MoveS1_150	1	68	rechts	maennlich	99	1	unrel	rechts	List4	links.bmp	1	1	454237	1	681	454918
RespPr_MoveS1_150	1	68	rechts	maennlich	100	1	unrel	rechts	List4	links.bmp	1	1	456503	1	791	457294
RespPr_MoveS1_150	1	68	rechts	maennlich	101	3	unrel	links	List4	rechts.bmp	1	3	458862	3	640	459502
RespPr_MoveS1_150	1	68	rechts	maennlich	102	1	neuInnen	neutralInnen	List4	links.bmp	1	1	461088	1	614	461702
RespPr_MoveS1_150	1	68	rechts	maennlich	103	1	neuAussen	neutralAussen	List4	links.bmp	1	1	463287	1	583	463870
RespPr_MoveS1_150	1	68	rechts	maennlich	104	3	unrel	links	List4	rechts.bmp	1	3	465446	3	656	466102
RespPr_MoveS1_150	1	68	rechts	maennlich	105	3	neuAussen	neutralAussen	List4	rechts.bmp	1	3	467685	3	633	468318
RespPr_MoveS1_150	1	68	rechts	maennlich	106	1	unrel	rechts	List4	links.bmp	1	1	469885	1	681	470566
RespPr_MoveS1_150	1	68	rechts	maennlich	107	3	rel	rechts	List4	rechts.bmp	1	3	472151	3	535	472686
RespPr_MoveS1_150	1	68	rechts	maennlich	108	1	rel	links	List4	links.bmp	1	1	474270	1	520	474790
RespPr_MoveS1_150	1	68	rechts	maennlich	109	3	rel	rechts	List4	rechts.bmp	1	3	476376	3	502	476878
RespPr_MoveS1_150	1	68	rechts	maennlich	110	1	neuInnen	neutralInnen	List4	links.bmp	1	1	478455	1	478	478933
RespPr_MoveS1_150	1	68	rechts	maennlich	111	3	unrel	links	List4	rechts.bmp	1	3	480521	3	629	481150
RespPr_MoveS1_150	1	68	rechts	maennlich	112	3	rel	rechts	List4	rechts.bmp	1	3	482734	3	608	483342
RespPr_MoveS1_150	1	68	rechts	maennlich	113	3	neuInnen	neutralInnen	List4	rechts.bmp	1	3	484920	3	598	485518
RespPr_MoveS1_150	1	68	rechts	maennlich	114	1	unrel	rechts	List4	links.bmp	1	1	487106	1	644	487750
RespPr_MoveS1_150	1	68	rechts	maennlich	115	3	neuAussen	neutralAussen	List4	rechts.bmp	1	3	489332	3	610	489942
RespPr_MoveS1_150	1	68	rechts	maennlich	116	1	rel	links	List4	links.bmp	1	1	491531	1	555	492086
RespPr_MoveS1_150	1	68	rechts	maennlich	117	1	rel	links	List4	links.bmp	1	1	493664	1	782	494446
RespPr_MoveS1_150	1	68	rechts	maennlich	118	3	neuAussen	neutralAussen	List4	rechts.bmp	1	3	496023	3	671	496694
RespPr_MoveS1_150	1	68	rechts	maennlich	119	1	neuAussen	neutralAussen	List4	links.bmp	1	1	498275	1	691	498966
RespPr_MoveS1_150	1	68	rechts	maennlich	120	3	rel	rechts	List4	rechts.bmp	1	3	500555	3	658	501213
RespPr_MoveS1_150	1	68	rechts	maennlich	121	1	rel	links	List5	links.bmp	1	1	508419	1	683	509102
RespPr_MoveS1_150	1	68	rechts	maennlich	122	3	rel	rechts	List5	rechts.bmp	1	3	510685	3	641	511326
RespPr_MoveS1_150	1	68	rechts	maennlich	123	3	rel	rechts	List5	rechts.bmp	1	3	512911	3	592	513503
RespPr_MoveS1_150	1	68	rechts	maennlich	124	3	rel	rechts	List5	rechts.bmp	1	3	515083	3	586	515669
RespPr_MoveS1_150	1	68	rechts	maennlich	125	1	rel	links	List5	links.bmp	1	1	517256	1	614	517870
RespPr_MoveS1_150	1	68	rechts	maennlich	126	1	unrel	rechts	List5	links.bmp	1	1	519455	1	623	520078
RespPr_MoveS1_150	1	68	rechts	maennlich	127	1	neuAussen	neutralAussen	List5	links.bmp	1	1	521654	1	695	522349
RespPr_MoveS1_150	1	68	rechts	maennlich	128	1	rel	links	List5	links.bmp	1	1	523934	1	624	524558
RespPr_MoveS1_150	1	68	rechts	maennlich	129	3	unrel	links	List5	rechts.bmp	1	3	526146	3	660	526806
RespPr_MoveS1_150	1	68	rechts	maennlich	130	3	neuAussen	neutralAussen	List5	rechts.bmp	1	3	528385	3	613	528998
RespPr_MoveS1_150	1	68	rechts	maennlich	131	1	neuInnen	neutralInnen	List5	links.bmp	1	1	530585	1	733	531318
RespPr_MoveS1_150	1	68	rechts	maennlich	132	3	rel	rechts	List5	rechts.bmp	1	3	532904	3	742	533646
RespPr_MoveS1_150	1	68	rechts	maennlich	133	1	rel	links	List5	links.bmp	1	1	535223	1	615	535838
RespPr_MoveS1_150	1	68	rechts	maennlich	134	3	rel	rechts	List5	rechts.bmp	1	3	537422	3	632	538054
RespPr_MoveS1_150	1	68	rechts	maennlich	135	3	unrel	links	List5	rechts.bmp	1	3	539622	3	656	540278
RespPr_MoveS1_150	1	68	rechts	maennlich	136	3	unrel	links	List5	rechts.bmp	1	3	541861	3	545	542406
RespPr_MoveS1_150	1	68	rechts	maennlich	137	1	rel	links	List5	links.bmp	1	1	543994	1	572	544566
RespPr_MoveS1_150	1	68	rechts	maennlich	138	1	unrel	rechts	List5	links.bmp	1	1	546153	1	565	546718
RespPr_MoveS1_150	1	68	rechts	maennlich	139	1	unrel	rechts	List5	links.bmp	1	1	548299	1	555	548854
RespPr_MoveS1_150	1	68	rechts	maennlich	140	3	unrel	links	List5	rechts.bmp	1	3	550431	3	567	550998
RespPr_MoveS1_150	1	68	rechts	maennlich	141	3	unrel	links	List5	rechts.bmp	1	3	552577	3	661	553238
RespPr_MoveS1_150	1	68	rechts	maennlich	142	1	unrel	rechts	List5	links.bmp	1	1	554817	1	653	555470
RespPr_MoveS1_150	1	68	rechts	maennlich	143	3	neuInnen	neutralInnen	List5	rechts.bmp	1	3	557056	3	575	557631
RespPr_MoveS1_150	1	68	rechts	maennlich	144	1	neuInnen	neutralInnen	List5	links.bmp	1	1	559215	1	511	559726
RespPr_MoveS1_150	1	68	rechts	maennlich	145	1	neuAussen	neutralAussen	List5	links.bmp	1	1	561308	1	706	562014
RespPr_MoveS1_150	1	68	rechts	maennlich	146	3	neuAussen	neutralAussen	List5	rechts.bmp	1	3	563600	3	574	564174
RespPr_MoveS1_150	1	68	rechts	maennlich	147	1	neuInnen	neutralInnen	List5	links.bmp	1	1	565760	1	558	566318
RespPr_MoveS1_150	1	68	rechts	maennlich	148	1	unrel	rechts	List5	links.bmp	1	1	567906	1	644	568550
RespPr_MoveS1_150	1	68	rechts	maennlich	149	3	unrel	links	List5	rechts.bmp	1	3	570132	3	666	570798
RespPr_MoveS1_150	1	68	rechts	maennlich	150	1	rel	links	List5	links.bmp	1	1	572384	1	574	572958
RespPr_MoveS1_150	1	68	rechts	maennlich	151	3	neuInnen	neutralInnen	List5	rechts.bmp	1	3	574543	3	655	575198
RespPr_MoveS1_150	1	68	rechts	maennlich	152	3	neuAussen	neutralAussen	List5	rechts.bmp	1	3	576783	3	671	577454
RespPr_MoveS1_150	1	68	rechts	maennlich	153	3	rel	rechts	List5	rechts.bmp	1	3	579035	3	571	579606
RespPr_MoveS1_150	1	68	rechts	maennlich	154	1	neuAussen	neutralAussen	List5	links.bmp	1	1	581195	1	579	581774
RespPr_MoveS1_150	1	68	rechts	maennlich	155	1	unrel	rechts	List5	links.bmp	1	1	583354	1	708	584062
RespPr_MoveS1_150	1	68	rechts	maennlich	156	3	neuInnen	neutralInnen	List5	rechts.bmp	1	3	585646	3	648	586294
RespPr_MoveS1_150	20	68	rechts	weiblich	1	1	neuInnen	neutralInnen	List1	links.bmp	1	1	82508	1	744	83252
RespPr_MoveS1_150	20	68	rechts	weiblich	2	3	unrel	links	List1	rechts.bmp	1	3	84840	3	708	85548
RespPr_MoveS1_150	20	68	rechts	weiblich	3	1	rel	links	List1	links.bmp	1	1	87120	1	476	87596
RespPr_MoveS1_150	20	68	rechts	weiblich	4	1	unrel	rechts	List1	links.bmp	1	1	89172	1	488	89660
RespPr_MoveS1_150	20	68	rechts	weiblich	5	1	unrel	rechts	List1	links.bmp	1	1	91238	1	470	91708
RespPr_MoveS1_150	20	68	rechts	weiblich	6	3	neuAussen	neutralAussen	List1	rechts.bmp	1	3	93278	3	582	93860
RespPr_MoveS1_150	20	68	rechts	weiblich	7	1	neuAussen	neutralAussen	List1	links.bmp	1	1	95424	1	476	95900
RespPr_MoveS1_150	20	68	rechts	weiblich	8	1	rel	links	List1	links.bmp	1	1	97476	1	552	98028
RespPr_MoveS1_150	20	68	rechts	weiblich	9	3	unrel	links	List1	rechts.bmp	1	3	99609	3	603	100212
RespPr_MoveS1_150	20	68	rechts	weiblich	10	3	rel	rechts	List1	rechts.bmp	1	3	101795	3	657	102452
RespPr_MoveS1_150	20	68	rechts	weiblich	11	3	neuInnen	neutralInnen	List1	rechts.bmp	1	3	104034	3	610	104644
RespPr_MoveS1_150	20	68	rechts	weiblich	12	3	rel	rechts	List1	rechts.bmp	1	3	106207	3	469	106676
RespPr_MoveS1_150	20	68	rechts	weiblich	13	1	neuAussen	neutralAussen	List2	links.bmp	1	1	118816	1	604	119420
RespPr_MoveS1_150	20	68	rechts	weiblich	14	3	unrel	links	List2	rechts.bmp	1	3	121002	3	522	121524
RespPr_MoveS1_150	20	68	rechts	weiblich	15	1	unrel	rechts	List2	links.bmp	1	1	123108	1	464	123572
RespPr_MoveS1_150	20	68	rechts	weiblich	16	1	rel	links	List2	links.bmp	1	1	125160	1	612	125772
RespPr_MoveS1_150	20	68	rechts	weiblich	17	3	unrel	links	List2	rechts.bmp	1	3	127360	3	476	127836
RespPr_MoveS1_150	20	68	rechts	weiblich	18	3	unrel	links	List2	rechts.bmp	1	3	129412	3	512	129924
RespPr_MoveS1_150	20	68	rechts	weiblich	19	3	rel	rechts	List2	rechts.bmp	1	3	131492	3	464	131956
RespPr_MoveS1_150	20	68	rechts	weiblich	20	1	unrel	rechts	List2	links.bmp	1	1	133544	1	492	134036
RespPr_MoveS1_150	20	68	rechts	weiblich	21	3	neuAussen	neutralAussen	List2	rechts.bmp	1	3	135624	3	428	136052
RespPr_MoveS1_150	20	68	rechts	weiblich	22	3	rel	rechts	List2	rechts.bmp	1	3	137636	3	512	138148
RespPr_MoveS1_150	20	68	rechts	weiblich	23	3	neuInnen	neutralInnen	List2	rechts.bmp	1	3	139716	3	504	140220
RespPr_MoveS1_150	20	68	rechts	weiblich	24	1	rel	links	List2	links.bmp	1	1	141808	1	516	142324
RespPr_MoveS1_150	20	68	rechts	weiblich	25	1	neuInnen	neutralInnen	List2	links.bmp	1	1	143901	1	567	144468
RespPr_MoveS1_150	20	68	rechts	weiblich	26	1	neuAussen	neutralAussen	List2	links.bmp	1	1	146047	1	493	146540
RespPr_MoveS1_150	20	68	rechts	weiblich	27	1	rel	links	List2	links.bmp	1	1	148126	1	470	148596
RespPr_MoveS1_150	20	68	rechts	weiblich	28	3	unrel	links	List2	rechts.bmp	1	3	150179	3	408	150587
RespPr_MoveS1_150	20	68	rechts	weiblich	29	1	neuInnen	neutralInnen	List2	links.bmp	1	1	152165	1	415	152580
RespPr_MoveS1_150	20	68	rechts	weiblich	30	3	rel	rechts	List2	rechts.bmp	1	3	154164	3	528	154692
RespPr_MoveS1_150	20	68	rechts	weiblich	31	3	neuAussen	neutralAussen	List2	rechts.bmp	1	3	156270	3	550	156820
RespPr_MoveS1_150	20	68	rechts	weiblich	32	1	rel	links	List2	links.bmp	1	1	158403	1	529	158932
RespPr_MoveS1_150	20	68	rechts	weiblich	33	3	rel	rechts	List2	rechts.bmp	1	3	160509	3	455	160964
RespPr_MoveS1_150	20	68	rechts	weiblich	34	1	neuInnen	neutralInnen	List2	links.bmp	1	1	162548	1	416	162964
RespPr_MoveS1_150	20	68	rechts	weiblich	35	1	unrel	rechts	List2	links.bmp	1	1	164547	1	505	165052
RespPr_MoveS1_150	20	68	rechts	weiblich	36	3	neuAussen	neutralAussen	List2	rechts.bmp	1	3	166627	3	401	167028
RespPr_MoveS1_150	20	68	rechts	weiblich	37	3	unrel	links	List2	rechts.bmp	1	3	168613	3	551	169164
RespPr_MoveS1_150	20	68	rechts	weiblich	38	1	rel	links	List2	links.bmp	1	1	170745	1	491	171236
RespPr_MoveS1_150	20	68	rechts	weiblich	39	3	rel	rechts	List2	rechts.bmp	1	3	172825	3	435	173260
RespPr_MoveS1_150	20	68	rechts	weiblich	40	3	neuInnen	neutralInnen	List2	rechts.bmp	1	3	174837	3	455	175292
RespPr_MoveS1_150	20	68	rechts	weiblich	41	1	neuAussen	neutralAussen	List2	links.bmp	1	1	176877	1	519	177396
RespPr_MoveS1_150	20	68	rechts	weiblich	42	1	unrel	rechts	List2	links.bmp	1	1	178983	1	573	179556
RespPr_MoveS1_150	20	68	rechts	weiblich	43	3	unrel	links	List2	rechts.bmp	1	3	181129	3	410	181539
RespPr_MoveS1_150	20	68	rechts	weiblich	44	3	rel	rechts	List2	rechts.bmp	1	3	183115	3	457	183572
RespPr_MoveS1_150	20	68	rechts	weiblich	45	3	neuInnen	neutralInnen	List2	rechts.bmp	1	3	185141	3	495	185636
RespPr_MoveS1_150	20	68	rechts	weiblich	46	1	unrel	rechts	List2	links.bmp	1	1	187220	1	439	187659
RespPr_MoveS1_150	20	68	rechts	weiblich	47	1	rel	links	List2	links.bmp	1	1	189246	1	462	189708
RespPr_MoveS1_150	20	68	rechts	weiblich	48	1	unrel	rechts	List2	links.bmp	1	1	191285	1	455	191740
RespPr_MoveS1_150	20	68	rechts	weiblich	49	3	unrel	links	List3	rechts.bmp	1	3	203401	3	523	203924
RespPr_MoveS1_150	20	68	rechts	weiblich	50	1	neuAussen	neutralAussen	List3	links.bmp	1	1	205507	1	449	205956
RespPr_MoveS1_150	20	68	rechts	weiblich	51	1	neuInnen	neutralInnen	List3	links.bmp	1	1	207533	1	519	208052
RespPr_MoveS1_150	20	68	rechts	weiblich	52	3	rel	rechts	List3	rechts.bmp	1	3	209639	3	469	210108
RespPr_MoveS1_150	20	68	rechts	weiblich	53	3	unrel	links	List3	rechts.bmp	1	3	211692	3	536	212228
RespPr_MoveS1_150	20	68	rechts	weiblich	54	1	rel	links	List3	links.bmp	1	1	213811	1	521	214332
RespPr_MoveS1_150	20	68	rechts	weiblich	55	1	rel	links	List3	links.bmp	1	1	215917	1	535	216452
RespPr_MoveS1_150	20	68	rechts	weiblich	56	3	rel	rechts	List3	rechts.bmp	1	3	218036	3	495	218531
RespPr_MoveS1_150	20	68	rechts	weiblich	57	3	neuInnen	neutralInnen	List3	rechts.bmp	1	3	220116	3	496	220612
RespPr_MoveS1_150	20	68	rechts	weiblich	58	1	unrel	rechts	List3	links.bmp	1	1	222182	1	462	222644
RespPr_MoveS1_150	20	68	rechts	weiblich	59	1	neuInnen	neutralInnen	List3	links.bmp	1	1	224208	1	508	224716
RespPr_MoveS1_150	20	68	rechts	weiblich	60	3	neuAussen	neutralAussen	List3	rechts.bmp	1	3	226300	3	408	226708
RespPr_MoveS1_150	20	68	rechts	weiblich	61	1	unrel	rechts	List3	links.bmp	1	1	228286	1	414	228700
RespPr_MoveS1_150	20	68	rechts	weiblich	62	1	unrel	rechts	List3	links.bmp	1	1	230286	1	502	230788
RespPr_MoveS1_150	20	68	rechts	weiblich	63	3	neuInnen	neutralInnen	List3	rechts.bmp	1	3	232352	3	428	232780
RespPr_MoveS1_150	20	68	rechts	weiblich	64	3	unrel	links	List3	rechts.bmp	1	3	234364	3	488	234852
RespPr_MoveS1_150	20	68	rechts	weiblich	65	3	rel	rechts	List3	rechts.bmp	1	3	236430	3	525	236955
RespPr_MoveS1_150	20	68	rechts	weiblich	66	1	unrel	rechts	List3	links.bmp	1	1	238536	1	444	238980
RespPr_MoveS1_150	20	68	rechts	weiblich	67	1	unrel	rechts	List3	links.bmp	1	1	240562	1	522	241084
RespPr_MoveS1_150	20	68	rechts	weiblich	68	1	neuAussen	neutralAussen	List3	links.bmp	1	1	242668	1	496	243164
RespPr_MoveS1_150	20	68	rechts	weiblich	69	3	neuAussen	neutralAussen	List3	rechts.bmp	1	3	244748	3	432	245180
RespPr_MoveS1_150	20	68	rechts	weiblich	70	3	rel	rechts	List3	rechts.bmp	1	3	246760	3	484	247244
RespPr_MoveS1_150	20	68	rechts	weiblich	71	3	rel	rechts	List3	rechts.bmp	1	3	248826	3	482	249308
RespPr_MoveS1_150	20	68	rechts	weiblich	72	3	unrel	links	List3	rechts.bmp	1	3	250892	3	512	251404
RespPr_MoveS1_150	20	68	rechts	weiblich	73	1	rel	links	List3	links.bmp	1	1	252985	1	467	253452
RespPr_MoveS1_150	20	68	rechts	weiblich	74	3	unrel	links	List3	rechts.bmp	1	3	255038	3	365	255403
RespPr_MoveS1_150	20	68	rechts	weiblich	75	1	rel	links	List3	links.bmp	1	1	256984	1	436	257420
RespPr_MoveS1_150	20	68	rechts	weiblich	76	1	rel	links	List3	links.bmp	1	1	258996	1	504	259500
RespPr_MoveS1_150	20	68	rechts	weiblich	77	1	rel	links	List3	links.bmp	1	1	261089	1	483	261572
RespPr_MoveS1_150	20	68	rechts	weiblich	78	3	unrel	links	List3	rechts.bmp	1	3	263155	3	465	263620
RespPr_MoveS1_150	20	68	rechts	weiblich	79	3	neuAussen	neutralAussen	List3	rechts.bmp	1	3	265208	3	468	265676
RespPr_MoveS1_150	20	68	rechts	weiblich	80	3	rel	rechts	List3	rechts.bmp	1	3	267260	3	456	267716
RespPr_MoveS1_150	20	68	rechts	weiblich	81	1	unrel	rechts	List3	links.bmp	1	1	269300	1	400	269700
RespPr_MoveS1_150	20	68	rechts	weiblich	82	1	neuInnen	neutralInnen	List3	links.bmp	1	1	271286	1	494	271780
RespPr_MoveS1_150	20	68	rechts	weiblich	83	1	neuAussen	neutralAussen	List3	links.bmp	1	1	273365	1	407	273772
RespPr_MoveS1_150	20	68	rechts	weiblich	84	3	neuInnen	neutralInnen	List3	rechts.bmp	1	3	275351	3	445	275796
RespPr_MoveS1_150	20	68	rechts	weiblich	85	1	unrel	rechts	List4	links.bmp	1	1	311192	1	708	311900
RespPr_MoveS1_150	20	68	rechts	weiblich	86	3	rel	rechts	List4	rechts.bmp	1	3	313485	3	487	313972
RespPr_MoveS1_150	20	68	rechts	weiblich	87	3	unrel	links	List4	rechts.bmp	1	3	315551	3	461	316012
RespPr_MoveS1_150	20	68	rechts	weiblich	88	3	rel	rechts	List4	rechts.bmp	1	3	317590	3	454	318044
RespPr_MoveS1_150	20	68	rechts	weiblich	89	3	neuInnen	neutralInnen	List4	rechts.bmp	1	3	319630	3	454	320084
RespPr_MoveS1_150	20	68	rechts	weiblich	90	3	unrel	links	List4	rechts.bmp	1	3	321669	3	367	322036
RespPr_MoveS1_150	20	68	rechts	weiblich	91	3	neuAussen	neutralAussen	List4	rechts.bmp	1	3	323615	3	357	323972
RespPr_MoveS1_150	20	68	rechts	weiblich	92	1	rel	links	List4	links.bmp	1	1	325561	1	403	325964
RespPr_MoveS1_150	20	68	rechts	weiblich	93	1	neuAussen	neutralAussen	List4	links.bmp	1	1	327547	1	481	328028
RespPr_MoveS1_150	20	68	rechts	weiblich	94	1	unrel	rechts	List4	links.bmp	1	1	329613	1	456	330069
RespPr_MoveS1_150	20	68	rechts	weiblich	95	1	unrel	rechts	List4	links.bmp	1	1	331652	1	440	332092
RespPr_MoveS1_150	20	68	rechts	weiblich	96	3	unrel	links	List4	rechts.bmp	1	3	333678	3	358	334036
RespPr_MoveS1_150	20	68	rechts	weiblich	97	1	unrel	rechts	List4	links.bmp	1	1	335624	1	500	336124
RespPr_MoveS1_150	20	68	rechts	weiblich	98	3	unrel	links	List4	rechts.bmp	1	3	337704	3	348	338052
RespPr_MoveS1_150	20	68	rechts	weiblich	99	1	neuAussen	neutralAussen	List4	links.bmp	1	1	339636	1	415	340051
RespPr_MoveS1_150	20	68	rechts	weiblich	100	1	neuInnen	neutralInnen	List4	links.bmp	1	1	341636	1	456	342092
RespPr_MoveS1_150	20	68	rechts	weiblich	101	1	unrel	rechts	List4	links.bmp	1	1	343675	1	409	344084
RespPr_MoveS1_150	20	68	rechts	weiblich	102	3	neuAussen	neutralAussen	List4	rechts.bmp	1	3	345661	3	519	346180
RespPr_MoveS1_150	20	68	rechts	weiblich	103	3	rel	rechts	List4	rechts.bmp	1	3	347767	3	533	348300
RespPr_MoveS1_150	20	68	rechts	weiblich	104	3	neuAussen	neutralAussen	List4	rechts.bmp	1	3	349886	3	534	350420
RespPr_MoveS1_150	20	68	rechts	weiblich	105	1	rel	links	List4	links.bmp	1	1	352005	1	479	352484
RespPr_MoveS1_150	20	68	rechts	weiblich	106	1	rel	links	List4	links.bmp	1	1	354071	1	557	354628
RespPr_MoveS1_150	20	68	rechts	weiblich	107	3	neuInnen	neutralInnen	List4	rechts.bmp	1	3	356191	3	452	356643
RespPr_MoveS1_150	20	68	rechts	weiblich	108	1	neuInnen	neutralInnen	List4	links.bmp	1	1	358217	1	490	358707
RespPr_MoveS1_150	20	68	rechts	weiblich	109	1	rel	links	List4	links.bmp	1	1	360283	1	490	360773
RespPr_MoveS1_150	20	68	rechts	weiblich	110	3	rel	rechts	List4	rechts.bmp	1	3	362349	3	431	362780
RespPr_MoveS1_150	20	68	rechts	weiblich	111	3	unrel	links	List4	rechts.bmp	1	3	364361	3	483	364844
RespPr_MoveS1_150	20	68	rechts	weiblich	112	3	neuInnen	neutralInnen	List4	rechts.bmp	1	3	366427	3	480	366907
RespPr_MoveS1_150	20	68	rechts	weiblich	113	3	rel	rechts	List4	rechts.bmp	1	3	368493	3	487	368980
RespPr_MoveS1_150	20	68	rechts	weiblich	114	1	unrel	rechts	List4	links.bmp	1	1	370559	1	533	371092
RespPr_MoveS1_150	20	68	rechts	weiblich	115	3	rel	rechts	List4	rechts.bmp	1	3	372679	3	477	373156
RespPr_MoveS1_150	20	68	rechts	weiblich	116	1	rel	links	List4	links.bmp	1	1	374745	1	699	375444
RespPr_MoveS1_150	20	68	rechts	weiblich	117	1	neuAussen	neutralAussen	List4	links.bmp	1	1	377024	1	620	377644
RespPr_MoveS1_150	20	68	rechts	weiblich	118	1	neuInnen	neutralInnen	List4	links.bmp	1	1	379223	1	549	379772
RespPr_MoveS1_150	20	68	rechts	weiblich	119	1	rel	links	List4	links.bmp	1	1	381356	1	480	381836
RespPr_MoveS1_150	20	68	rechts	weiblich	120	3	unrel	links	List4	rechts.bmp	1	3	383422	3	478	383900
RespPr_MoveS1_150	20	68	rechts	weiblich	121	3	neuAussen	neutralAussen	List5	rechts.bmp	1	3	413838	3	526	414364
RespPr_MoveS1_150	20	68	rechts	weiblich	122	1	neuInnen	neutralInnen	List5	links.bmp	1	1	415944	1	548	416492
RespPr_MoveS1_150	20	68	rechts	weiblich	123	3	rel	rechts	List5	rechts.bmp	1	3	418077	3	423	418500
RespPr_MoveS1_150	20	68	rechts	weiblich	124	1	unrel	rechts	List5	links.bmp	1	1	420076	1	464	420540
RespPr_MoveS1_150	20	68	rechts	weiblich	125	1	rel	links	List5	links.bmp	1	1	422129	1	411	422540
RespPr_MoveS1_150	20	68	rechts	weiblich	126	3	neuInnen	neutralInnen	List5	rechts.bmp	1	3	424128	3	468	424596
RespPr_MoveS1_150	20	68	rechts	weiblich	127	3	neuInnen	neutralInnen	List5	rechts.bmp	1	3	426181	3	471	426652
RespPr_MoveS1_150	20	68	rechts	weiblich	128	3	rel	rechts	List5	rechts.bmp	1	3	428234	3	458	428692
RespPr_MoveS1_150	20	68	rechts	weiblich	129	1	neuInnen	neutralInnen	List5	links.bmp	1	1	430273	1	506	430779
RespPr_MoveS1_150	20	68	rechts	weiblich	130	1	unrel	rechts	List5	links.bmp	1	1	432366	1	454	432820
RespPr_MoveS1_150	20	68	rechts	weiblich	131	3	rel	rechts	List5	rechts.bmp	1	3	434405	3	478	434883
RespPr_MoveS1_150	20	68	rechts	weiblich	132	1	rel	links	List5	links.bmp	1	1	436471	1	565	437036
RespPr_MoveS1_150	20	68	rechts	weiblich	133	1	neuAussen	neutralAussen	List5	links.bmp	1	1	438617	1	459	439076
RespPr_MoveS1_150	20	68	rechts	weiblich	134	1	rel	links	List5	links.bmp	1	1	440656	1	484	441140
RespPr_MoveS1_150	20	68	rechts	weiblich	135	1	unrel	rechts	List5	links.bmp	1	1	442722	1	433	443155
RespPr_MoveS1_150	20	68	rechts	weiblich	136	3	unrel	links	List5	rechts.bmp	1	3	444735	3	469	445204
RespPr_MoveS1_150	20	68	rechts	weiblich	137	1	unrel	rechts	List5	links.bmp	1	1	446787	1	425	447212
RespPr_MoveS1_150	20	68	rechts	weiblich	138	3	unrel	links	List5	rechts.bmp	1	3	448800	3	388	449188
RespPr_MoveS1_150	20	68	rechts	weiblich	139	1	neuAussen	neutralAussen	List5	links.bmp	1	1	450773	1	415	451188
RespPr_MoveS1_150	20	68	rechts	weiblich	140	3	neuAussen	neutralAussen	List5	rechts.bmp	1	3	452772	3	391	453163
RespPr_MoveS1_150	20	68	rechts	weiblich	141	3	unrel	links	List5	rechts.bmp	1	3	454745	3	435	455180
RespPr_MoveS1_150	20	68	rechts	weiblich	142	3	rel	rechts	List5	rechts.bmp	1	3	456758	3	462	457220
RespPr_MoveS1_150	20	68	rechts	weiblich	143	3	neuInnen	neutralInnen	List5	rechts.bmp	1	3	458797	3	431	459228
RespPr_MoveS1_150	20	68	rechts	weiblich	144	1	neuInnen	neutralInnen	List5	links.bmp	1	1	460810	1	522	461332
RespPr_MoveS1_150	20	68	rechts	weiblich	145	3	unrel	links	List5	rechts.bmp	1	3	463035	3	625	463660
RespPr_MoveS1_150	20	68	rechts	weiblich	146	3	neuAussen	neutralAussen	List5	rechts.bmp	1	3	465235	3	464	465699
RespPr_MoveS1_150	20	68	rechts	weiblich	147	3	unrel	links	List5	rechts.bmp	1	3	467287	3	485	467772
RespPr_MoveS1_150	20	68	rechts	weiblich	148	1	rel	links	List5	links.bmp	1	1	469353	1	579	469932
RespPr_MoveS1_150	20	68	rechts	weiblich	149	3	rel	rechts	List5	rechts.bmp	1	3	471513	3	491	472004
RespPr_MoveS1_150	20	68	rechts	weiblich	150	1	unrel	rechts	List5	links.bmp	1	1	473592	1	443	474035
RespPr_MoveS1_150	20	68	rechts	weiblich	151	1	unrel	rechts	List5	links.bmp	1	1	475618	1	522	476140
RespPr_MoveS1_150	20	68	rechts	weiblich	152	3	unrel	links	List5	rechts.bmp	1	3	477724	3	416	478140
RespPr_MoveS1_150	20	68	rechts	weiblich	153	1	neuAussen	neutralAussen	List5	links.bmp	1	1	479723	1	465	480188
RespPr_MoveS1_150	20	68	rechts	weiblich	154	3	rel	rechts	List5	rechts.bmp	1	3	481776	3	460	482236
RespPr_MoveS1_150	20	68	rechts	weiblich	155	1	rel	links	List5	links.bmp	1	1	483815	1	429	484244
RespPr_MoveS1_150	20	68	rechts	weiblich	156	1	rel	links	List5	links.bmp	1	1	485828	1	544	486372
RespPr_MoveS1_150	3	63	rechts	weiblich	1	3	rel	rechts	List1	rechts.bmp	1	3	132691	3	1077	133768
RespPr_MoveS1_150	3	63	rechts	weiblich	2	1	rel	links	List1	links.bmp	1	1	135344	1	560	135904
RespPr_MoveS1_150	3	63	rechts	weiblich	3	3	unrel	links	List1	rechts.bmp	1	3	137490	3	462	137952
RespPr_MoveS1_150	3	63	rechts	weiblich	4	3	unrel	links	List1	rechts.bmp	0	3	139529	1	479	140008
RespPr_MoveS1_150	3	63	rechts	weiblich	5	3	rel	rechts	List1	rechts.bmp	1	3	141595	3	541	142136
RespPr_MoveS1_150	3	63	rechts	weiblich	6	1	unrel	rechts	List1	links.bmp	1	1	143714	1	518	144232
RespPr_MoveS1_150	3	63	rechts	weiblich	7	3	neuAussen	neutralAussen	List1	rechts.bmp	1	3	145807	3	417	146224
RespPr_MoveS1_150	3	63	rechts	weiblich	8	1	neuAussen	neutralAussen	List1	links.bmp	1	1	147806	1	458	148264
RespPr_MoveS1_150	3	63	rechts	weiblich	9	3	neuInnen	neutralInnen	List1	rechts.bmp	1	3	149845	3	403	150248
RespPr_MoveS1_150	3	63	rechts	weiblich	10	1	unrel	rechts	List1	links.bmp	1	1	151831	1	465	152296
RespPr_MoveS1_150	3	63	rechts	weiblich	11	1	rel	links	List1	links.bmp	1	1	153871	1	713	154584
RespPr_MoveS1_150	3	63	rechts	weiblich	12	1	neuInnen	neutralInnen	List1	links.bmp	1	1	156163	1	733	156896
RespPr_MoveS1_150	3	63	rechts	weiblich	13	3	rel	rechts	List2	rechts.bmp	1	3	177730	3	462	178192
RespPr_MoveS1_150	3	63	rechts	weiblich	14	1	neuAussen	neutralAussen	List2	links.bmp	1	1	179769	1	487	180256
RespPr_MoveS1_150	3	63	rechts	weiblich	15	1	neuInnen	neutralInnen	List2	links.bmp	1	1	181835	1	453	182288
RespPr_MoveS1_150	3	63	rechts	weiblich	16	3	rel	rechts	List2	rechts.bmp	1	3	183874	3	471	184345
RespPr_MoveS1_150	3	63	rechts	weiblich	17	3	unrel	links	List2	rechts.bmp	1	3	185927	3	458	186385
RespPr_MoveS1_150	3	63	rechts	weiblich	18	1	rel	links	List2	links.bmp	1	1	187966	1	435	188401
RespPr_MoveS1_150	3	63	rechts	weiblich	19	3	rel	rechts	List2	rechts.bmp	1	3	189979	3	534	190513
RespPr_MoveS1_150	3	63	rechts	weiblich	20	3	unrel	links	List2	rechts.bmp	1	3	192098	3	518	192616
RespPr_MoveS1_150	3	63	rechts	weiblich	21	1	unrel	rechts	List2	links.bmp	1	1	194204	1	460	194664
RespPr_MoveS1_150	3	63	rechts	weiblich	22	1	rel	links	List2	links.bmp	1	1	196243	1	605	196848
RespPr_MoveS1_150	3	63	rechts	weiblich	23	1	neuInnen	neutralInnen	List2	links.bmp	1	1	198429	1	451	198880
RespPr_MoveS1_150	3	63	rechts	weiblich	24	3	neuInnen	neutralInnen	List2	rechts.bmp	1	3	200469	3	507	200976
RespPr_MoveS1_150	3	63	rechts	weiblich	25	1	neuInnen	neutralInnen	List2	links.bmp	1	1	202561	1	535	203096
RespPr_MoveS1_150	3	63	rechts	weiblich	26	3	rel	rechts	List2	rechts.bmp	1	3	204681	3	871	205552
RespPr_MoveS1_150	3	63	rechts	weiblich	27	3	neuInnen	neutralInnen	List2	rechts.bmp	1	3	207133	3	524	207657
RespPr_MoveS1_150	3	63	rechts	weiblich	28	1	neuAussen	neutralAussen	List2	links.bmp	1	1	209239	1	529	209768
RespPr_MoveS1_150	3	63	rechts	weiblich	29	1	rel	links	List2	links.bmp	1	1	211332	1	517	211849
RespPr_MoveS1_150	3	63	rechts	weiblich	30	3	unrel	links	List2	rechts.bmp	1	3	213438	3	482	213920
RespPr_MoveS1_150	3	63	rechts	weiblich	31	1	neuAussen	neutralAussen	List2	links.bmp	1	1	215504	1	473	215977
RespPr_MoveS1_150	3	63	rechts	weiblich	32	3	neuAussen	neutralAussen	List2	rechts.bmp	1	3	217556	3	532	218088
RespPr_MoveS1_150	3	63	rechts	weiblich	33	1	unrel	rechts	List2	links.bmp	1	1	219676	1	444	220120
RespPr_MoveS1_150	3	63	rechts	weiblich	34	3	rel	rechts	List2	rechts.bmp	1	3	221702	3	722	222424
RespPr_MoveS1_150	3	63	rechts	weiblich	35	1	rel	links	List2	links.bmp	1	1	224008	1	585	224593
RespPr_MoveS1_150	3	63	rechts	weiblich	36	1	rel	links	List2	links.bmp	1	1	226180	1	452	226632
RespPr_MoveS1_150	3	63	rechts	weiblich	37	1	unrel	rechts	List2	links.bmp	1	1	228220	1	524	228744
RespPr_MoveS1_150	3	63	rechts	weiblich	38	3	unrel	links	List2	rechts.bmp	1	3	230326	3	570	230896
RespPr_MoveS1_150	3	63	rechts	weiblich	39	3	rel	rechts	List2	rechts.bmp	1	3	232485	3	483	232968
RespPr_MoveS1_150	3	63	rechts	weiblich	40	3	neuAussen	neutralAussen	List2	rechts.bmp	1	3	234551	3	441	234992
RespPr_MoveS1_150	3	63	rechts	weiblich	41	3	unrel	links	List2	rechts.bmp	1	3	236577	3	2656	239233
RespPr_MoveS1_150	3	63	rechts	weiblich	42	3	neuInnen	neutralInnen	List2	rechts.bmp	1	3	240815	3	593	241408
RespPr_MoveS1_150	3	63	rechts	weiblich	43	1	unrel	rechts	List2	links.bmp	1	1	242988	1	548	243536
RespPr_MoveS1_150	3	63	rechts	weiblich	44	3	neuAussen	neutralAussen	List2	rechts.bmp	1	3	245121	3	679	245800
RespPr_MoveS1_150	3	63	rechts	weiblich	45	1	unrel	rechts	List2	links.bmp	1	1	247387	1	485	247872
RespPr_MoveS1_150	3	63	rechts	weiblich	46	1	rel	links	List2	links.bmp	1	1	249453	1	475	249928
RespPr_MoveS1_150	3	63	rechts	weiblich	47	3	unrel	links	List2	rechts.bmp	1	3	251505	3	479	251984
RespPr_MoveS1_150	3	63	rechts	weiblich	48	1	unrel	rechts	List2	links.bmp	1	1	253571	1	509	254080
RespPr_MoveS1_150	3	63	rechts	weiblich	49	3	rel	rechts	List3	rechts.bmp	1	3	262288	3	528	262816
RespPr_MoveS1_150	3	63	rechts	weiblich	50	3	neuInnen	neutralInnen	List3	rechts.bmp	1	3	264394	3	510	264904
RespPr_MoveS1_150	3	63	rechts	weiblich	51	1	unrel	rechts	List3	links.bmp	1	1	266487	1	529	267016
RespPr_MoveS1_150	3	63	rechts	weiblich	52	1	neuAussen	neutralAussen	List3	links.bmp	1	1	268593	1	431	269024
RespPr_MoveS1_150	3	63	rechts	weiblich	53	1	rel	links	List3	links.bmp	1	1	270606	1	474	271080
RespPr_MoveS1_150	3	63	rechts	weiblich	54	3	rel	rechts	List3	rechts.bmp	1	3	272658	3	439	273097
RespPr_MoveS1_150	3	63	rechts	weiblich	55	1	neuAussen	neutralAussen	List3	links.bmp	1	1	274684	1	469	275153
RespPr_MoveS1_150	3	63	rechts	weiblich	56	1	rel	links	List3	links.bmp	1	1	276737	1	535	277272
RespPr_MoveS1_150	3	63	rechts	weiblich	57	1	neuInnen	neutralInnen	List3	links.bmp	1	1	278856	1	432	279288
RespPr_MoveS1_150	3	63	rechts	weiblich	58	3	neuAussen	neutralAussen	List3	rechts.bmp	1	3	280869	3	531	281400
RespPr_MoveS1_150	3	63	rechts	weiblich	59	1	rel	links	List3	links.bmp	1	1	282975	1	506	283481
RespPr_MoveS1_150	3	63	rechts	weiblich	60	3	neuInnen	neutralInnen	List3	rechts.bmp	1	3	285067	3	550	285617
RespPr_MoveS1_150	3	63	rechts	weiblich	61	1	unrel	rechts	List3	links.bmp	1	1	287187	1	485	287672
RespPr_MoveS1_150	3	63	rechts	weiblich	62	3	neuAussen	neutralAussen	List3	rechts.bmp	1	3	289253	3	524	289777
RespPr_MoveS1_150	3	63	rechts	weiblich	63	3	unrel	links	List3	rechts.bmp	1	3	291359	3	434	291793
RespPr_MoveS1_150	3	63	rechts	weiblich	64	1	neuInnen	neutralInnen	List3	links.bmp	1	1	293371	1	478	293849
RespPr_MoveS1_150	3	63	rechts	weiblich	65	3	rel	rechts	List3	rechts.bmp	1	3	295437	3	539	295976
RespPr_MoveS1_150	3	63	rechts	weiblich	66	1	unrel	rechts	List3	links.bmp	1	1	297557	1	443	298000
RespPr_MoveS1_150	3	63	rechts	weiblich	67	1	neuAussen	neutralAussen	List3	links.bmp	1	1	299583	1	537	300120
RespPr_MoveS1_150	3	63	rechts	weiblich	68	1	unrel	rechts	List3	links.bmp	1	1	301702	1	442	302144
RespPr_MoveS1_150	3	63	rechts	weiblich	69	3	neuInnen	neutralInnen	List3	rechts.bmp	1	3	303728	3	472	304200
RespPr_MoveS1_150	3	63	rechts	weiblich	70	3	rel	rechts	List3	rechts.bmp	1	3	305781	3	508	306289
RespPr_MoveS1_150	3	63	rechts	weiblich	71	3	unrel	links	List3	rechts.bmp	1	3	307873	3	463	308336
RespPr_MoveS1_150	3	63	rechts	weiblich	72	1	neuInnen	neutralInnen	List3	links.bmp	1	1	309913	1	455	310368
RespPr_MoveS1_150	3	63	rechts	weiblich	73	3	neuAussen	neutralAussen	List3	rechts.bmp	1	3	311952	3	504	312456
RespPr_MoveS1_150	3	63	rechts	weiblich	74	3	unrel	links	List3	rechts.bmp	1	3	314044	3	444	314488
RespPr_MoveS1_150	3	63	rechts	weiblich	75	3	rel	rechts	List3	rechts.bmp	1	3	316070	3	594	316664
RespPr_MoveS1_150	3	63	rechts	weiblich	76	1	rel	links	List3	links.bmp	1	1	318230	1	467	318697
RespPr_MoveS1_150	3	63	rechts	weiblich	77	1	rel	links	List3	links.bmp	1	1	320282	1	446	320728
RespPr_MoveS1_150	3	63	rechts	weiblich	78	3	unrel	links	List3	rechts.bmp	1	3	322308	3	508	322816
RespPr_MoveS1_150	3	63	rechts	weiblich	79	3	unrel	links	List3	rechts.bmp	1	3	324388	3	444	324832
RespPr_MoveS1_150	3	63	rechts	weiblich	80	1	rel	links	List3	links.bmp	1	1	326414	1	562	326976
RespPr_MoveS1_150	3	63	rechts	weiblich	81	1	unrel	rechts	List3	links.bmp	1	1	328560	1	432	328992
RespPr_MoveS1_150	3	63	rechts	weiblich	82	3	unrel	links	List3	rechts.bmp	1	3	330572	3	1948	332520
RespPr_MoveS1_150	3	63	rechts	weiblich	83	1	unrel	rechts	List3	links.bmp	1	1	334105	1	495	334600
RespPr_MoveS1_150	3	63	rechts	weiblich	84	3	rel	rechts	List3	rechts.bmp	1	3	336184	3	488	336672
RespPr_MoveS1_150	3	63	rechts	weiblich	85	3	neuAussen	neutralAussen	List4	rechts.bmp	1	3	343142	3	467	343609
RespPr_MoveS1_150	3	63	rechts	weiblich	86	1	neuAussen	neutralAussen	List4	links.bmp	1	1	345194	1	558	345752
RespPr_MoveS1_150	3	63	rechts	weiblich	87	3	rel	rechts	List4	rechts.bmp	1	3	347340	3	428	347768
RespPr_MoveS1_150	3	63	rechts	weiblich	88	1	rel	links	List4	links.bmp	1	1	349353	1	751	350104
RespPr_MoveS1_150	3	63	rechts	weiblich	89	1	neuInnen	neutralInnen	List4	links.bmp	1	1	351685	1	443	352128
RespPr_MoveS1_150	3	63	rechts	weiblich	90	1	neuAussen	neutralAussen	List4	links.bmp	1	1	353711	1	473	354184
RespPr_MoveS1_150	3	63	rechts	weiblich	91	3	unrel	links	List4	rechts.bmp	1	3	355751	3	465	356216
RespPr_MoveS1_150	3	63	rechts	weiblich	92	3	rel	rechts	List4	rechts.bmp	1	3	357803	3	517	358320
RespPr_MoveS1_150	3	63	rechts	weiblich	93	1	neuAussen	neutralAussen	List4	links.bmp	1	1	359909	1	523	360432
RespPr_MoveS1_150	3	63	rechts	weiblich	94	3	neuInnen	neutralInnen	List4	rechts.bmp	1	3	362015	3	537	362552
RespPr_MoveS1_150	3	63	rechts	weiblich	95	3	rel	rechts	List4	rechts.bmp	1	3	364135	3	609	364744
RespPr_MoveS1_150	3	63	rechts	weiblich	96	3	unrel	links	List4	rechts.bmp	1	3	366321	3	488	366809
RespPr_MoveS1_150	3	63	rechts	weiblich	97	1	neuInnen	neutralInnen	List4	links.bmp	1	1	368387	1	477	368864
RespPr_MoveS1_150	3	63	rechts	weiblich	98	3	rel	rechts	List4	rechts.bmp	1	3	370453	3	459	370912
RespPr_MoveS1_150	3	63	rechts	weiblich	99	1	rel	links	List4	links.bmp	1	1	372492	1	589	373081
RespPr_MoveS1_150	3	63	rechts	weiblich	100	3	unrel	links	List4	rechts.bmp	1	3	374664	3	456	375120
RespPr_MoveS1_150	3	63	rechts	weiblich	101	3	neuInnen	neutralInnen	List4	rechts.bmp	1	3	376704	3	456	377160
RespPr_MoveS1_150	3	63	rechts	weiblich	102	1	rel	links	List4	links.bmp	1	1	378730	1	414	379144
RespPr_MoveS1_150	3	63	rechts	weiblich	103	1	rel	links	List4	links.bmp	1	1	380716	1	436	381152
RespPr_MoveS1_150	3	63	rechts	weiblich	104	1	unrel	rechts	List4	links.bmp	1	1	382728	1	440	383168
RespPr_MoveS1_150	3	63	rechts	weiblich	105	1	rel	links	List4	links.bmp	1	1	384754	1	494	385248
RespPr_MoveS1_150	3	63	rechts	weiblich	106	3	rel	rechts	List4	rechts.bmp	1	3	386834	3	518	387352
RespPr_MoveS1_150	3	63	rechts	weiblich	107	3	neuAussen	neutralAussen	List4	rechts.bmp	1	3	388940	3	516	389456
RespPr_MoveS1_150	3	63	rechts	weiblich	108	3	neuInnen	neutralInnen	List4	rechts.bmp	1	3	391032	3	560	391592
RespPr_MoveS1_150	3	63	rechts	weiblich	109	1	unrel	rechts	List4	links.bmp	1	1	393178	1	486	393664
RespPr_MoveS1_150	3	63	rechts	weiblich	110	3	unrel	links	List4	rechts.bmp	1	3	395244	3	637	395881
RespPr_MoveS1_150	3	63	rechts	weiblich	111	1	unrel	rechts	List4	links.bmp	1	1	397457	1	479	397936
RespPr_MoveS1_150	3	63	rechts	weiblich	112	1	unrel	rechts	List4	links.bmp	1	1	399523	1	429	399952
RespPr_MoveS1_150	3	63	rechts	weiblich	113	1	rel	links	List4	links.bmp	1	1	401536	1	536	402072
RespPr_MoveS1_150	3	63	rechts	weiblich	114	3	rel	rechts	List4	rechts.bmp	1	3	403655	3	481	404136
RespPr_MoveS1_150	3	63	rechts	weiblich	115	3	neuAussen	neutralAussen	List4	rechts.bmp	1	3	405721	3	559	406280
RespPr_MoveS1_150	3	63	rechts	weiblich	116	1	neuInnen	neutralInnen	List4	links.bmp	1	1	407867	1	469	408336
RespPr_MoveS1_150	3	63	rechts	weiblich	117	3	unrel	links	List4	rechts.bmp	1	3	409919	3	433	410352
RespPr_MoveS1_150	3	63	rechts	weiblich	118	1	unrel	rechts	List4	links.bmp	1	1	411932	1	468	412400
RespPr_MoveS1_150	3	63	rechts	weiblich	119	1	unrel	rechts	List4	links.bmp	1	1	413985	1	487	414472
RespPr_MoveS1_150	3	63	rechts	weiblich	120	3	unrel	links	List4	rechts.bmp	1	3	416051	3	469	416520
RespPr_MoveS1_150	3	63	rechts	weiblich	121	3	unrel	links	List5	rechts.bmp	1	3	426461	3	667	427128
RespPr_MoveS1_150	3	63	rechts	weiblich	122	3	rel	rechts	List5	rechts.bmp	1	3	428713	3	536	429249
RespPr_MoveS1_150	3	63	rechts	weiblich	123	1	rel	links	List5	links.bmp	1	1	430833	1	527	431360
RespPr_MoveS1_150	3	63	rechts	weiblich	124	1	unrel	rechts	List5	links.bmp	1	1	432939	1	485	433424
RespPr_MoveS1_150	3	63	rechts	weiblich	125	1	neuInnen	neutralInnen	List5	links.bmp	1	1	435004	1	492	435496
RespPr_MoveS1_150	3	63	rechts	weiblich	126	1	unrel	rechts	List5	links.bmp	1	1	437084	1	452	437536
RespPr_MoveS1_150	3	63	rechts	weiblich	127	3	rel	rechts	List5	rechts.bmp	1	3	439123	3	509	439632
RespPr_MoveS1_150	3	63	rechts	weiblich	128	3	rel	rechts	List5	rechts.bmp	1	3	441216	3	528	441744
RespPr_MoveS1_150	3	63	rechts	weiblich	129	1	rel	links	List5	links.bmp	1	1	443322	1	463	443785
RespPr_MoveS1_150	3	63	rechts	weiblich	130	3	rel	rechts	List5	rechts.bmp	1	3	445348	3	452	445800
RespPr_MoveS1_150	3	63	rechts	weiblich	131	1	unrel	rechts	List5	links.bmp	1	1	447374	1	426	447800
RespPr_MoveS1_150	3	63	rechts	weiblich	132	3	unrel	links	List5	rechts.bmp	1	3	449386	3	391	449777
RespPr_MoveS1_150	3	63	rechts	weiblich	133	3	unrel	links	List5	rechts.bmp	1	3	451346	3	415	451761
RespPr_MoveS1_150	3	63	rechts	weiblich	134	3	neuAussen	neutralAussen	List5	rechts.bmp	1	3	453332	3	460	453792
RespPr_MoveS1_150	3	63	rechts	weiblich	135	1	unrel	rechts	List5	links.bmp	1	1	455358	1	658	456016
RespPr_MoveS1_150	3	63	rechts	weiblich	136	3	rel	rechts	List5	rechts.bmp	1	3	457584	3	489	458073
RespPr_MoveS1_150	3	63	rechts	weiblich	137	3	unrel	links	List5	rechts.bmp	1	3	459650	3	406	460056
RespPr_MoveS1_150	3	63	rechts	weiblich	138	1	unrel	rechts	List5	links.bmp	1	1	461636	1	476	462112
RespPr_MoveS1_150	3	63	rechts	weiblich	139	3	neuAussen	neutralAussen	List5	rechts.bmp	1	3	463688	3	409	464097
RespPr_MoveS1_150	3	63	rechts	weiblich	140	1	neuAussen	neutralAussen	List5	links.bmp	1	1	465674	1	406	466080
RespPr_MoveS1_150	3	63	rechts	weiblich	141	3	rel	rechts	List5	rechts.bmp	1	3	467660	3	516	468176
RespPr_MoveS1_150	3	63	rechts	weiblich	142	3	neuInnen	neutralInnen	List5	rechts.bmp	1	3	469740	3	516	470256
RespPr_MoveS1_150	3	63	rechts	weiblich	143	3	neuAussen	neutralAussen	List5	rechts.bmp	1	3	471832	3	529	472361
RespPr_MoveS1_150	3	63	rechts	weiblich	144	1	neuInnen	neutralInnen	List5	links.bmp	1	1	473938	1	478	474416
RespPr_MoveS1_150	3	63	rechts	weiblich	145	1	neuInnen	neutralInnen	List5	links.bmp	1	1	476004	1	492	476496
RespPr_MoveS1_150	3	63	rechts	weiblich	146	1	rel	links	List5	links.bmp	0	1	478084	3	436	478520
RespPr_MoveS1_150	3	63	rechts	weiblich	147	1	unrel	rechts	List5	links.bmp	1	1	480110	1	906	481016
RespPr_MoveS1_150	3	63	rechts	weiblich	148	1	rel	links	List5	links.bmp	1	1	482589	1	539	483128
RespPr_MoveS1_150	3	63	rechts	weiblich	149	3	unrel	links	List5	rechts.bmp	1	3	484695	3	530	485225
RespPr_MoveS1_150	3	63	rechts	weiblich	150	3	neuInnen	neutralInnen	List5	rechts.bmp	1	3	486801	3	519	487320
RespPr_MoveS1_150	3	63	rechts	weiblich	151	1	neuAussen	neutralAussen	List5	links.bmp	1	1	488907	1	605	489512
RespPr_MoveS1_150	3	63	rechts	weiblich	152	3	neuInnen	neutralInnen	List5	rechts.bmp	1	3	491093	3	515	491608
RespPr_MoveS1_150	3	63	rechts	weiblich	153	1	rel	links	List5	links.bmp	1	1	493185	1	455	493640
RespPr_MoveS1_150	3	63	rechts	weiblich	154	3	unrel	links	List5	rechts.bmp	1	3	495225	3	455	495680
RespPr_MoveS1_150	3	63	rechts	weiblich	155	1	neuAussen	neutralAussen	List5	links.bmp	1	1	497264	1	440	497704
RespPr_MoveS1_150	3	63	rechts	weiblich	156	1	rel	links	List5	links.bmp	1	1	499290	1	486	499776
RespPr_MoveS1_150	5	63	rechts	weiblich	1	3	neuInnen	neutralInnen	List1	rechts.bmp	1	3	74481	3	1286	75767
RespPr_MoveS1_150	5	63	rechts	weiblich	2	1	unrel	rechts	List1	links.bmp	1	1	77373	1	498	77871
RespPr_MoveS1_150	5	63	rechts	weiblich	3	3	unrel	links	List1	rechts.bmp	1	3	79453	3	418	79871
RespPr_MoveS1_150	5	63	rechts	weiblich	4	1	neuInnen	neutralInnen	List1	links.bmp	1	1	81439	1	480	81919
RespPr_MoveS1_150	5	63	rechts	weiblich	5	3	unrel	links	List1	rechts.bmp	1	3	83505	3	422	83927
RespPr_MoveS1_150	5	63	rechts	weiblich	6	3	rel	rechts	List1	rechts.bmp	1	3	85491	3	604	86095
RespPr_MoveS1_150	5	63	rechts	weiblich	7	3	rel	rechts	List1	rechts.bmp	1	3	87677	3	474	88151
RespPr_MoveS1_150	5	63	rechts	weiblich	8	3	neuAussen	neutralAussen	List1	rechts.bmp	1	3	89729	3	470	90199
RespPr_MoveS1_150	5	63	rechts	weiblich	9	1	neuAussen	neutralAussen	List1	links.bmp	1	1	91769	1	550	92319
RespPr_MoveS1_150	5	63	rechts	weiblich	10	1	rel	links	List1	links.bmp	1	1	93901	1	698	94599
RespPr_MoveS1_150	5	63	rechts	weiblich	11	1	unrel	rechts	List1	links.bmp	1	1	96181	1	522	96703
RespPr_MoveS1_150	5	63	rechts	weiblich	12	1	rel	links	List1	links.bmp	1	1	98287	1	632	98919
RespPr_MoveS1_150	5	63	rechts	weiblich	13	3	rel	rechts	List2	rechts.bmp	1	3	114148	3	579	114727
RespPr_MoveS1_150	5	63	rechts	weiblich	14	1	rel	links	List2	links.bmp	1	1	116307	1	692	116999
RespPr_MoveS1_150	5	63	rechts	weiblich	15	3	neuAussen	neutralAussen	List2	rechts.bmp	1	3	118586	3	949	119535
RespPr_MoveS1_150	5	63	rechts	weiblich	16	1	neuInnen	neutralInnen	List2	links.bmp	1	1	121119	1	680	121799
RespPr_MoveS1_150	5	63	rechts	weiblich	17	3	neuInnen	neutralInnen	List2	rechts.bmp	1	3	123385	3	477	123862
RespPr_MoveS1_150	5	63	rechts	weiblich	18	3	neuInnen	neutralInnen	List2	rechts.bmp	1	3	125451	3	508	125959
RespPr_MoveS1_150	5	63	rechts	weiblich	19	1	neuInnen	neutralInnen	List2	links.bmp	1	1	127544	1	559	128103
RespPr_MoveS1_150	5	63	rechts	weiblich	20	3	unrel	links	List2	rechts.bmp	1	3	129689	3	438	130127
RespPr_MoveS1_150	5	63	rechts	weiblich	21	1	neuAussen	neutralAussen	List2	links.bmp	1	1	131715	1	508	132223
RespPr_MoveS1_150	5	63	rechts	weiblich	22	3	unrel	links	List2	rechts.bmp	1	3	133795	3	444	134239
RespPr_MoveS1_150	5	63	rechts	weiblich	23	3	unrel	links	List2	rechts.bmp	1	3	135821	3	506	136327
RespPr_MoveS1_150	5	63	rechts	weiblich	24	1	unrel	rechts	List2	links.bmp	1	1	137913	1	438	138351
RespPr_MoveS1_150	5	63	rechts	weiblich	25	3	neuAussen	neutralAussen	List2	rechts.bmp	1	3	139939	3	468	140407
RespPr_MoveS1_150	5	63	rechts	weiblich	26	1	unrel	rechts	List2	links.bmp	1	1	141979	1	483	142462
RespPr_MoveS1_150	5	63	rechts	weiblich	27	1	rel	links	List2	links.bmp	1	1	144045	1	554	144599
RespPr_MoveS1_150	5	63	rechts	weiblich	28	1	neuAussen	neutralAussen	List2	links.bmp	1	1	146177	1	590	146767
RespPr_MoveS1_150	5	63	rechts	weiblich	29	1	rel	links	List2	links.bmp	1	1	148350	1	553	148903
RespPr_MoveS1_150	5	63	rechts	weiblich	30	3	rel	rechts	List2	rechts.bmp	1	3	150483	3	452	150935
RespPr_MoveS1_150	5	63	rechts	weiblich	31	1	unrel	rechts	List2	links.bmp	1	1	152522	1	533	153055
RespPr_MoveS1_150	5	63	rechts	weiblich	32	3	rel	rechts	List2	rechts.bmp	1	3	154641	3	638	155279
RespPr_MoveS1_150	5	63	rechts	weiblich	33	3	rel	rechts	List2	rechts.bmp	1	3	156867	3	509	157376
RespPr_MoveS1_150	5	63	rechts	weiblich	34	1	neuAussen	neutralAussen	List2	links.bmp	1	1	158960	1	487	159447
RespPr_MoveS1_150	5	63	rechts	weiblich	35	1	unrel	rechts	List2	links.bmp	1	1	161026	1	654	161680
RespPr_MoveS1_150	5	63	rechts	weiblich	36	3	neuInnen	neutralInnen	List2	rechts.bmp	1	3	163252	3	483	163735
RespPr_MoveS1_150	5	63	rechts	weiblich	37	1	rel	links	List2	links.bmp	1	1	165318	1	592	165910
RespPr_MoveS1_150	5	63	rechts	weiblich	38	3	rel	rechts	List2	rechts.bmp	1	3	167490	3	493	167983
RespPr_MoveS1_150	5	63	rechts	weiblich	39	3	neuAussen	neutralAussen	List2	rechts.bmp	1	3	169570	3	517	170087
RespPr_MoveS1_150	5	63	rechts	weiblich	40	3	unrel	links	List2	rechts.bmp	1	3	171676	3	763	172439
RespPr_MoveS1_150	5	63	rechts	weiblich	41	1	rel	links	List2	links.bmp	1	1	174021	1	506	174527
RespPr_MoveS1_150	5	63	rechts	weiblich	42	3	rel	rechts	List2	rechts.bmp	1	3	176101	3	642	176743
RespPr_MoveS1_150	5	63	rechts	weiblich	43	1	unrel	rechts	List2	links.bmp	1	1	178327	1	568	178895
RespPr_MoveS1_150	5	63	rechts	weiblich	44	3	unrel	links	List2	rechts.bmp	1	3	180473	3	430	180903
RespPr_MoveS1_150	5	63	rechts	weiblich	45	1	neuInnen	neutralInnen	List2	links.bmp	1	1	182485	1	482	182967
RespPr_MoveS1_150	5	63	rechts	weiblich	46	1	rel	links	List2	links.bmp	1	1	184551	1	632	185183
RespPr_MoveS1_150	5	63	rechts	weiblich	47	1	unrel	rechts	List2	links.bmp	1	1	186764	1	491	187255
RespPr_MoveS1_150	5	63	rechts	weiblich	48	3	unrel	links	List2	rechts.bmp	1	3	188843	3	436	189279
RespPr_MoveS1_150	5	63	rechts	weiblich	49	1	rel	links	List3	links.bmp	1	1	198747	1	780	199527
RespPr_MoveS1_150	5	63	rechts	weiblich	50	3	rel	rechts	List3	rechts.bmp	1	3	201106	3	525	201631
RespPr_MoveS1_150	5	63	rechts	weiblich	51	3	rel	rechts	List3	rechts.bmp	1	3	203212	3	707	203919
RespPr_MoveS1_150	5	63	rechts	weiblich	52	3	unrel	links	List3	rechts.bmp	1	3	205504	3	480	205984
RespPr_MoveS1_150	5	63	rechts	weiblich	53	1	neuAussen	neutralAussen	List3	links.bmp	1	1	207570	1	493	208063
RespPr_MoveS1_150	5	63	rechts	weiblich	54	3	unrel	links	List3	rechts.bmp	1	3	209650	3	437	210087
RespPr_MoveS1_150	5	63	rechts	weiblich	55	3	unrel	links	List3	rechts.bmp	1	3	211676	3	507	212183
RespPr_MoveS1_150	5	63	rechts	weiblich	56	1	rel	links	List3	links.bmp	1	1	213768	1	527	214295
RespPr_MoveS1_150	5	63	rechts	weiblich	57	3	unrel	links	List3	rechts.bmp	1	3	215874	3	437	216311
RespPr_MoveS1_150	5	63	rechts	weiblich	58	1	neuInnen	neutralInnen	List3	links.bmp	1	1	217900	1	475	218375
RespPr_MoveS1_150	5	63	rechts	weiblich	59	3	neuInnen	neutralInnen	List3	rechts.bmp	1	3	219953	3	486	220439
RespPr_MoveS1_150	5	63	rechts	weiblich	60	3	rel	rechts	List3	rechts.bmp	1	3	222019	3	476	222495
RespPr_MoveS1_150	5	63	rechts	weiblich	61	1	rel	links	List3	links.bmp	1	1	224072	1	471	224543
RespPr_MoveS1_150	5	63	rechts	weiblich	62	1	unrel	rechts	List3	links.bmp	1	1	226124	1	547	226671
RespPr_MoveS1_150	5	63	rechts	weiblich	63	1	rel	links	List3	links.bmp	1	1	228257	1	638	228895
RespPr_MoveS1_150	5	63	rechts	weiblich	64	3	unrel	links	List3	rechts.bmp	1	3	230483	3	413	230896
RespPr_MoveS1_150	5	63	rechts	weiblich	65	3	rel	rechts	List3	rechts.bmp	1	3	232482	3	630	233112
RespPr_MoveS1_150	5	63	rechts	weiblich	66	3	neuAussen	neutralAussen	List3	rechts.bmp	1	3	234695	3	489	235184
RespPr_MoveS1_150	5	63	rechts	weiblich	67	1	unrel	rechts	List3	links.bmp	1	1	236761	1	470	237231
RespPr_MoveS1_150	5	63	rechts	weiblich	68	1	neuInnen	neutralInnen	List3	links.bmp	1	1	238813	1	475	239288
RespPr_MoveS1_150	5	63	rechts	weiblich	69	1	unrel	rechts	List3	links.bmp	1	1	240853	1	498	241351
RespPr_MoveS1_150	5	63	rechts	weiblich	70	3	neuInnen	neutralInnen	List3	rechts.bmp	1	3	242919	3	504	243423
RespPr_MoveS1_150	5	63	rechts	weiblich	71	1	neuInnen	neutralInnen	List3	links.bmp	1	1	245011	1	508	245519
RespPr_MoveS1_150	5	63	rechts	weiblich	72	3	neuAussen	neutralAussen	List3	rechts.bmp	1	3	247104	3	495	247599
RespPr_MoveS1_150	5	63	rechts	weiblich	73	1	unrel	rechts	List3	links.bmp	1	1	249183	1	472	249655
RespPr_MoveS1_150	5	63	rechts	weiblich	74	3	rel	rechts	List3	rechts.bmp	1	3	251236	3	731	251967
RespPr_MoveS1_150	5	63	rechts	weiblich	75	1	rel	links	List3	links.bmp	1	1	253555	1	556	254111
RespPr_MoveS1_150	5	63	rechts	weiblich	76	1	unrel	rechts	List3	links.bmp	1	1	255688	1	624	256312
RespPr_MoveS1_150	5	63	rechts	weiblich	77	3	unrel	links	List3	rechts.bmp	1	3	257900	3	443	258343
RespPr_MoveS1_150	5	63	rechts	weiblich	78	3	rel	rechts	List3	rechts.bmp	1	3	259926	3	561	260487
RespPr_MoveS1_150	5	63	rechts	weiblich	79	1	rel	links	List3	links.bmp	1	1	262072	1	519	262591
RespPr_MoveS1_150	5	63	rechts	weiblich	80	3	neuAussen	neutralAussen	List3	rechts.bmp	1	3	264178	3	429	264607
RespPr_MoveS1_150	5	63	rechts	weiblich	81	3	neuInnen	neutralInnen	List3	rechts.bmp	1	3	266178	3	565	266743
RespPr_MoveS1_150	5	63	rechts	weiblich	82	1	unrel	rechts	List3	links.bmp	1	1	268324	1	428	268752
RespPr_MoveS1_150	5	63	rechts	weiblich	83	1	neuAussen	neutralAussen	List3	links.bmp	1	1	270336	1	503	270839
RespPr_MoveS1_150	5	63	rechts	weiblich	84	1	neuAussen	neutralAussen	List3	links.bmp	1	1	272416	1	559	272975
RespPr_MoveS1_150	5	63	rechts	weiblich	85	1	unrel	rechts	List4	links.bmp	1	1	279067	1	660	279727
RespPr_MoveS1_150	5	63	rechts	weiblich	86	3	rel	rechts	List4	rechts.bmp	1	3	281293	3	490	281783
RespPr_MoveS1_150	5	63	rechts	weiblich	87	3	rel	rechts	List4	rechts.bmp	1	3	283359	3	520	283879
RespPr_MoveS1_150	5	63	rechts	weiblich	88	3	rel	rechts	List4	rechts.bmp	1	3	285465	3	494	285959
RespPr_MoveS1_150	5	63	rechts	weiblich	89	3	neuAussen	neutralAussen	List4	rechts.bmp	1	3	287544	3	431	287975
RespPr_MoveS1_150	5	63	rechts	weiblich	90	3	rel	rechts	List4	rechts.bmp	1	3	289557	3	450	290007
RespPr_MoveS1_150	5	63	rechts	weiblich	91	1	rel	links	List4	links.bmp	1	1	291596	1	491	292087
RespPr_MoveS1_150	5	63	rechts	weiblich	92	3	neuInnen	neutralInnen	List4	rechts.bmp	1	3	293675	3	412	294087
RespPr_MoveS1_150	5	63	rechts	weiblich	93	3	rel	rechts	List4	rechts.bmp	1	3	295675	3	492	296167
RespPr_MoveS1_150	5	63	rechts	weiblich	94	1	unrel	rechts	List4	links.bmp	1	1	297754	1	477	298231
RespPr_MoveS1_150	5	63	rechts	weiblich	95	1	neuInnen	neutralInnen	List4	links.bmp	1	1	299820	1	483	300303
RespPr_MoveS1_150	5	63	rechts	weiblich	96	1	rel	links	List4	links.bmp	1	1	301886	1	560	302446
RespPr_MoveS1_150	5	63	rechts	weiblich	97	1	neuAussen	neutralAussen	List4	links.bmp	1	1	304032	1	479	304511
RespPr_MoveS1_150	5	63	rechts	weiblich	98	1	neuAussen	neutralAussen	List4	links.bmp	1	1	306098	1	413	306511
RespPr_MoveS1_150	5	63	rechts	weiblich	99	1	rel	links	List4	links.bmp	1	1	308097	1	430	308527
RespPr_MoveS1_150	5	63	rechts	weiblich	100	1	neuInnen	neutralInnen	List4	links.bmp	1	1	310110	1	433	310543
RespPr_MoveS1_150	5	63	rechts	weiblich	101	3	neuAussen	neutralAussen	List4	rechts.bmp	1	3	312122	3	421	312543
RespPr_MoveS1_150	5	63	rechts	weiblich	102	3	unrel	links	List4	rechts.bmp	1	3	314122	3	493	314615
RespPr_MoveS1_150	5	63	rechts	weiblich	103	3	unrel	links	List4	rechts.bmp	1	3	316201	3	478	316679
RespPr_MoveS1_150	5	63	rechts	weiblich	104	3	neuAussen	neutralAussen	List4	rechts.bmp	1	3	318254	3	425	318679
RespPr_MoveS1_150	5	63	rechts	weiblich	105	3	unrel	links	List4	rechts.bmp	1	3	320266	3	493	320759
RespPr_MoveS1_150	5	63	rechts	weiblich	106	3	unrel	links	List4	rechts.bmp	1	3	322346	3	414	322760
RespPr_MoveS1_150	5	63	rechts	weiblich	107	3	unrel	links	List4	rechts.bmp	1	3	324332	3	403	324735
RespPr_MoveS1_150	5	63	rechts	weiblich	108	1	neuInnen	neutralInnen	List4	links.bmp	1	1	326318	1	625	326943
RespPr_MoveS1_150	5	63	rechts	weiblich	109	1	neuAussen	neutralAussen	List4	links.bmp	1	1	328530	1	406	328936
RespPr_MoveS1_150	5	63	rechts	weiblich	110	1	unrel	rechts	List4	links.bmp	1	1	330516	1	451	330967
RespPr_MoveS1_150	5	63	rechts	weiblich	111	3	rel	rechts	List4	rechts.bmp	1	3	332556	3	459	333015
RespPr_MoveS1_150	5	63	rechts	weiblich	112	1	rel	links	List4	links.bmp	1	1	334582	1	466	335048
RespPr_MoveS1_150	5	63	rechts	weiblich	113	3	neuInnen	neutralInnen	List4	rechts.bmp	1	3	336634	3	461	337095
RespPr_MoveS1_150	5	63	rechts	weiblich	114	1	rel	links	List4	links.bmp	1	1	338674	1	437	339111
RespPr_MoveS1_150	5	63	rechts	weiblich	115	1	unrel	rechts	List4	links.bmp	1	1	340700	1	563	341263
RespPr_MoveS1_150	5	63	rechts	weiblich	116	3	neuInnen	neutralInnen	List4	rechts.bmp	1	3	342846	3	489	343335
RespPr_MoveS1_150	5	63	rechts	weiblich	117	1	rel	links	List4	links.bmp	1	1	344912	1	463	345375
RespPr_MoveS1_150	5	63	rechts	weiblich	118	1	unrel	rechts	List4	links.bmp	1	1	346951	1	591	347542
RespPr_MoveS1_150	5	63	rechts	weiblich	119	3	unrel	links	List4	rechts.bmp	1	3	349124	3	563	349687
RespPr_MoveS1_150	5	63	rechts	weiblich	120	1	unrel	rechts	List4	links.bmp	1	1	351270	1	529	351799
RespPr_MoveS1_150	5	63	rechts	weiblich	121	1	unrel	rechts	List5	links.bmp	1	1	356121	1	815	356936
RespPr_MoveS1_150	5	63	rechts	weiblich	122	3	rel	rechts	List5	rechts.bmp	1	3	358520	3	535	359055
RespPr_MoveS1_150	5	63	rechts	weiblich	123	1	neuInnen	neutralInnen	List5	links.bmp	1	1	360640	1	454	361094
RespPr_MoveS1_150	5	63	rechts	weiblich	124	1	unrel	rechts	List5	links.bmp	1	1	362666	1	557	363223
RespPr_MoveS1_150	5	63	rechts	weiblich	125	3	neuInnen	neutralInnen	List5	rechts.bmp	1	3	364812	3	475	365287
RespPr_MoveS1_150	5	63	rechts	weiblich	126	3	neuAussen	neutralAussen	List5	rechts.bmp	1	3	366864	3	496	367360
RespPr_MoveS1_150	5	63	rechts	weiblich	127	3	unrel	links	List5	rechts.bmp	1	3	368944	3	607	369551
RespPr_MoveS1_150	5	63	rechts	weiblich	128	3	rel	rechts	List5	rechts.bmp	1	3	371130	3	573	371703
RespPr_MoveS1_150	5	63	rechts	weiblich	129	3	rel	rechts	List5	rechts.bmp	1	3	373289	3	541	373830
RespPr_MoveS1_150	5	63	rechts	weiblich	130	1	rel	links	List5	links.bmp	1	1	375408	1	543	375951
RespPr_MoveS1_150	5	63	rechts	weiblich	131	3	rel	rechts	List5	rechts.bmp	1	3	377528	3	559	378087
RespPr_MoveS1_150	5	63	rechts	weiblich	132	3	unrel	links	List5	rechts.bmp	1	3	379673	3	662	380335
RespPr_MoveS1_150	5	63	rechts	weiblich	133	3	neuAussen	neutralAussen	List5	rechts.bmp	1	3	381913	3	518	382431
RespPr_MoveS1_150	5	63	rechts	weiblich	134	3	unrel	links	List5	rechts.bmp	1	3	384019	3	484	384503
RespPr_MoveS1_150	5	63	rechts	weiblich	135	1	unrel	rechts	List5	links.bmp	1	1	386085	1	498	386583
RespPr_MoveS1_150	5	63	rechts	weiblich	136	3	neuInnen	neutralInnen	List5	rechts.bmp	1	3	388151	3	432	388583
RespPr_MoveS1_150	5	63	rechts	weiblich	137	3	neuAussen	neutralAussen	List5	rechts.bmp	1	3	390163	3	508	390671
RespPr_MoveS1_150	5	63	rechts	weiblich	138	1	rel	links	List5	links.bmp	1	1	392256	1	519	392775
RespPr_MoveS1_150	5	63	rechts	weiblich	139	3	unrel	links	List5	rechts.bmp	1	3	394362	3	470	394832
RespPr_MoveS1_150	5	63	rechts	weiblich	140	1	unrel	rechts	List5	links.bmp	1	1	396415	1	576	396991
RespPr_MoveS1_150	5	63	rechts	weiblich	141	1	rel	links	List5	links.bmp	1	1	398574	1	793	399367
RespPr_MoveS1_150	5	63	rechts	weiblich	142	1	rel	links	List5	links.bmp	1	1	400946	1	589	401535
RespPr_MoveS1_150	5	63	rechts	weiblich	143	1	neuInnen	neutralInnen	List5	links.bmp	1	1	403106	1	445	403551
RespPr_MoveS1_150	5	63	rechts	weiblich	144	1	rel	links	List5	links.bmp	1	1	405132	1	467	405599
RespPr_MoveS1_150	5	63	rechts	weiblich	145	3	unrel	links	List5	rechts.bmp	1	3	407184	3	415	407599
RespPr_MoveS1_150	5	63	rechts	weiblich	146	1	neuAussen	neutralAussen	List5	links.bmp	1	1	409184	1	439	409623
RespPr_MoveS1_150	5	63	rechts	weiblich	147	3	rel	rechts	List5	rechts.bmp	1	3	411210	3	453	411663
RespPr_MoveS1_150	5	63	rechts	weiblich	148	3	neuInnen	neutralInnen	List5	rechts.bmp	1	3	413236	3	515	413751
RespPr_MoveS1_150	5	63	rechts	weiblich	149	1	neuInnen	neutralInnen	List5	links.bmp	1	1	415328	1	519	415847
RespPr_MoveS1_150	5	63	rechts	weiblich	150	3	rel	rechts	List5	rechts.bmp	1	3	417434	3	453	417887
RespPr_MoveS1_150	5	63	rechts	weiblich	151	1	neuAussen	neutralAussen	List5	links.bmp	1	1	419474	1	541	420015
RespPr_MoveS1_150	5	63	rechts	weiblich	152	1	unrel	rechts	List5	links.bmp	1	1	421593	1	710	422303
RespPr_MoveS1_150	5	63	rechts	weiblich	153	1	unrel	rechts	List5	links.bmp	1	1	423886	1	433	424319
RespPr_MoveS1_150	5	63	rechts	weiblich	154	1	rel	links	List5	links.bmp	1	1	425898	1	509	426407
RespPr_MoveS1_150	5	63	rechts	weiblich	155	3	unrel	links	List5	rechts.bmp	1	3	427991	3	528	428519
RespPr_MoveS1_150	5	63	rechts	weiblich	156	1	neuAussen	neutralAussen	List5	links.bmp	1	1	430097	1	542	430639
RespPr_MoveS1_150	6	70	rechts	weiblich	1	1	neuInnen	neutralInnen	List1	links.bmp	1	1	251341	1	1314	252655
RespPr_MoveS1_150	6	70	rechts	weiblich	2	3	neuAussen	neutralAussen	List1	rechts.bmp	1	3	254233	3	462	254695
RespPr_MoveS1_150	6	70	rechts	weiblich	3	3	neuInnen	neutralInnen	List1	rechts.bmp	0	3	256273	1	399	256672
RespPr_MoveS1_150	6	70	rechts	weiblich	4	3	unrel	links	List1	rechts.bmp	1	3	258259	3	757	259016
RespPr_MoveS1_150	6	70	rechts	weiblich	5	1	rel	links	List1	links.bmp	1	1	260604	1	572	261176
RespPr_MoveS1_150	6	70	rechts	weiblich	6	1	neuAussen	neutralAussen	List1	links.bmp	1	1	262764	1	508	263272
RespPr_MoveS1_150	6	70	rechts	weiblich	7	3	rel	rechts	List1	rechts.bmp	1	3	264856	3	488	265344
RespPr_MoveS1_150	6	70	rechts	weiblich	8	3	unrel	links	List1	rechts.bmp	1	3	266922	3	382	267304
RespPr_MoveS1_150	6	70	rechts	weiblich	9	3	rel	rechts	List1	rechts.bmp	1	3	268882	3	454	269336
RespPr_MoveS1_150	6	70	rechts	weiblich	10	1	unrel	rechts	List1	links.bmp	1	1	270921	1	599	271520
RespPr_MoveS1_150	6	70	rechts	weiblich	11	1	rel	links	List1	links.bmp	1	1	273107	1	461	273568
RespPr_MoveS1_150	6	70	rechts	weiblich	12	1	unrel	rechts	List1	links.bmp	0	1	275146	3	358	275504
RespPr_MoveS1_150	6	70	rechts	weiblich	13	3	rel	rechts	List2	rechts.bmp	1	3	297419	3	588	298007
RespPr_MoveS1_150	6	70	rechts	weiblich	14	3	neuAussen	neutralAussen	List2	rechts.bmp	1	3	299592	3	464	300056
RespPr_MoveS1_150	6	70	rechts	weiblich	15	1	unrel	rechts	List2	links.bmp	1	1	301644	1	420	302064
RespPr_MoveS1_150	6	70	rechts	weiblich	16	1	unrel	rechts	List2	links.bmp	1	1	303644	1	435	304079
RespPr_MoveS1_150	6	70	rechts	weiblich	17	1	rel	links	List2	links.bmp	1	1	305656	1	511	306167
RespPr_MoveS1_150	6	70	rechts	weiblich	18	3	rel	rechts	List2	rechts.bmp	1	3	307749	3	379	308128
RespPr_MoveS1_150	6	70	rechts	weiblich	19	3	rel	rechts	List2	rechts.bmp	1	3	309708	3	396	310104
RespPr_MoveS1_150	6	70	rechts	weiblich	20	3	unrel	links	List2	rechts.bmp	1	3	311681	3	367	312048
RespPr_MoveS1_150	6	70	rechts	weiblich	21	1	neuAussen	neutralAussen	List2	links.bmp	1	1	313627	1	485	314112
RespPr_MoveS1_150	6	70	rechts	weiblich	22	1	neuAussen	neutralAussen	List2	links.bmp	1	1	315693	1	387	316080
RespPr_MoveS1_150	6	70	rechts	weiblich	23	1	rel	links	List2	links.bmp	1	1	317666	1	470	318136
RespPr_MoveS1_150	6	70	rechts	weiblich	24	3	unrel	links	List2	rechts.bmp	1	3	319718	3	361	320079
RespPr_MoveS1_150	6	70	rechts	weiblich	25	3	rel	rechts	List2	rechts.bmp	1	3	321664	3	400	322064
RespPr_MoveS1_150	6	70	rechts	weiblich	26	3	neuInnen	neutralInnen	List2	rechts.bmp	1	3	323650	3	382	324032
RespPr_MoveS1_150	6	70	rechts	weiblich	27	1	neuInnen	neutralInnen	List2	links.bmp	1	1	325610	1	501	326111
RespPr_MoveS1_150	6	70	rechts	weiblich	28	3	unrel	links	List2	rechts.bmp	1	3	327689	3	471	328160
RespPr_MoveS1_150	6	70	rechts	weiblich	29	1	neuInnen	neutralInnen	List2	links.bmp	1	1	329742	1	402	330144
RespPr_MoveS1_150	6	70	rechts	weiblich	30	3	neuInnen	neutralInnen	List2	rechts.bmp	1	3	331728	3	336	332064
RespPr_MoveS1_150	6	70	rechts	weiblich	31	3	unrel	links	List2	rechts.bmp	1	3	333647	3	424	334071
RespPr_MoveS1_150	6	70	rechts	weiblich	32	3	unrel	links	List2	rechts.bmp	1	3	335660	3	364	336024
RespPr_MoveS1_150	6	70	rechts	weiblich	33	1	rel	links	List2	links.bmp	1	1	337606	1	474	338080
RespPr_MoveS1_150	6	70	rechts	weiblich	34	1	unrel	rechts	List2	links.bmp	1	1	339658	1	414	340072
RespPr_MoveS1_150	6	70	rechts	weiblich	35	1	neuInnen	neutralInnen	List2	links.bmp	1	1	341658	1	398	342056
RespPr_MoveS1_150	6	70	rechts	weiblich	36	1	unrel	rechts	List2	links.bmp	1	1	343644	1	403	344047
RespPr_MoveS1_150	6	70	rechts	weiblich	37	1	unrel	rechts	List2	links.bmp	1	1	345630	1	402	346032
RespPr_MoveS1_150	6	70	rechts	weiblich	38	1	rel	links	List2	links.bmp	1	1	347616	1	439	348055
RespPr_MoveS1_150	6	70	rechts	weiblich	39	1	neuAussen	neutralAussen	List2	links.bmp	1	1	349642	1	382	350024
RespPr_MoveS1_150	6	70	rechts	weiblich	40	3	neuAussen	neutralAussen	List2	rechts.bmp	1	3	351601	3	519	352120
RespPr_MoveS1_150	6	70	rechts	weiblich	41	1	unrel	rechts	List2	links.bmp	1	1	353707	1	469	354176
RespPr_MoveS1_150	6	70	rechts	weiblich	42	3	neuAussen	neutralAussen	List2	rechts.bmp	1	3	355760	3	463	356223
RespPr_MoveS1_150	6	70	rechts	weiblich	43	1	rel	links	List2	links.bmp	1	1	357812	1	468	358280
RespPr_MoveS1_150	6	70	rechts	weiblich	44	3	unrel	links	List2	rechts.bmp	1	3	359865	3	486	360351
RespPr_MoveS1_150	6	70	rechts	weiblich	45	3	rel	rechts	List2	rechts.bmp	1	3	361931	3	453	362384
RespPr_MoveS1_150	6	70	rechts	weiblich	46	3	neuInnen	neutralInnen	List2	rechts.bmp	1	3	363970	3	413	364383
RespPr_MoveS1_150	6	70	rechts	weiblich	47	3	rel	rechts	List2	rechts.bmp	1	3	365970	3	414	366384
RespPr_MoveS1_150	6	70	rechts	weiblich	48	1	rel	links	List2	links.bmp	1	1	367969	1	487	368456
RespPr_MoveS1_150	6	70	rechts	weiblich	49	1	unrel	rechts	List3	links.bmp	1	1	384017	1	495	384512
RespPr_MoveS1_150	6	70	rechts	weiblich	50	1	neuInnen	neutralInnen	List3	links.bmp	1	1	386096	1	367	386463
RespPr_MoveS1_150	6	70	rechts	weiblich	51	1	neuAussen	neutralAussen	List3	links.bmp	1	1	388042	1	357	388399
RespPr_MoveS1_150	6	70	rechts	weiblich	52	3	neuAussen	neutralAussen	List3	rechts.bmp	1	3	389988	3	467	390455
RespPr_MoveS1_150	6	70	rechts	weiblich	53	3	neuAussen	neutralAussen	List3	rechts.bmp	1	3	392041	3	343	392384
RespPr_MoveS1_150	6	70	rechts	weiblich	54	3	rel	rechts	List3	rechts.bmp	1	3	393960	3	376	394336
RespPr_MoveS1_150	6	70	rechts	weiblich	55	3	unrel	links	List3	rechts.bmp	1	3	395920	3	440	396360
RespPr_MoveS1_150	6	70	rechts	weiblich	56	1	rel	links	List3	links.bmp	1	1	397946	1	502	398448
RespPr_MoveS1_150	6	70	rechts	weiblich	57	1	rel	links	List3	links.bmp	1	1	400025	1	446	400471
RespPr_MoveS1_150	6	70	rechts	weiblich	58	1	unrel	rechts	List3	links.bmp	1	1	402051	1	445	402496
RespPr_MoveS1_150	6	70	rechts	weiblich	59	3	rel	rechts	List3	rechts.bmp	1	3	404077	3	403	404480
RespPr_MoveS1_150	6	70	rechts	weiblich	60	3	unrel	links	List3	rechts.bmp	1	3	406063	3	337	406400
RespPr_MoveS1_150	6	70	rechts	weiblich	61	1	unrel	rechts	List3	links.bmp	1	1	407982	1	434	408416
RespPr_MoveS1_150	6	70	rechts	weiblich	62	1	rel	links	List3	links.bmp	1	1	409982	1	409	410391
RespPr_MoveS1_150	6	70	rechts	weiblich	63	1	unrel	rechts	List3	links.bmp	1	1	411968	1	463	412431
RespPr_MoveS1_150	6	70	rechts	weiblich	64	1	neuInnen	neutralInnen	List3	links.bmp	1	1	414020	1	420	414440
RespPr_MoveS1_150	6	70	rechts	weiblich	65	3	neuAussen	neutralAussen	List3	rechts.bmp	1	3	416020	3	452	416472
RespPr_MoveS1_150	6	70	rechts	weiblich	66	3	unrel	links	List3	rechts.bmp	1	3	418046	3	442	418488
RespPr_MoveS1_150	6	70	rechts	weiblich	67	3	neuInnen	neutralInnen	List3	rechts.bmp	1	3	420072	3	400	420472
RespPr_MoveS1_150	6	70	rechts	weiblich	68	1	rel	links	List3	links.bmp	1	1	422058	1	470	422528
RespPr_MoveS1_150	6	70	rechts	weiblich	69	1	neuInnen	neutralInnen	List3	links.bmp	1	1	424110	1	385	424495
RespPr_MoveS1_150	6	70	rechts	weiblich	70	1	neuAussen	neutralAussen	List3	links.bmp	1	1	426070	1	578	426648
RespPr_MoveS1_150	6	70	rechts	weiblich	71	3	unrel	links	List3	rechts.bmp	1	3	428229	3	443	428672
RespPr_MoveS1_150	6	70	rechts	weiblich	72	3	neuInnen	neutralInnen	List3	rechts.bmp	1	3	430255	3	329	430584
RespPr_MoveS1_150	6	70	rechts	weiblich	73	1	unrel	rechts	List3	links.bmp	1	1	432148	1	388	432536
RespPr_MoveS1_150	6	70	rechts	weiblich	74	1	rel	links	List3	links.bmp	1	1	434120	1	392	434512
RespPr_MoveS1_150	6	70	rechts	weiblich	75	3	neuInnen	neutralInnen	List3	rechts.bmp	1	3	436080	3	440	436520
RespPr_MoveS1_150	6	70	rechts	weiblich	76	3	rel	rechts	List3	rechts.bmp	1	3	438106	3	365	438471
RespPr_MoveS1_150	6	70	rechts	weiblich	77	3	rel	rechts	List3	rechts.bmp	1	3	440052	3	387	440439
RespPr_MoveS1_150	6	70	rechts	weiblich	78	3	unrel	links	List3	rechts.bmp	1	3	442024	3	424	442448
RespPr_MoveS1_150	6	70	rechts	weiblich	79	1	rel	links	List3	links.bmp	1	1	444024	1	536	444560
RespPr_MoveS1_150	6	70	rechts	weiblich	80	3	rel	rechts	List3	rechts.bmp	1	3	446130	3	422	446552
RespPr_MoveS1_150	6	70	rechts	weiblich	81	1	neuAussen	neutralAussen	List3	links.bmp	1	1	448116	1	380	448496
RespPr_MoveS1_150	6	70	rechts	weiblich	82	1	unrel	rechts	List3	links.bmp	1	1	450062	1	466	450528
RespPr_MoveS1_150	6	70	rechts	weiblich	83	3	unrel	links	List3	rechts.bmp	1	3	452114	3	301	452415
RespPr_MoveS1_150	6	70	rechts	weiblich	84	3	rel	rechts	List3	rechts.bmp	1	3	453994	3	358	454352
RespPr_MoveS1_150	6	70	rechts	weiblich	85	3	unrel	links	List4	rechts.bmp	1	3	465003	3	397	465400
RespPr_MoveS1_150	6	70	rechts	weiblich	86	1	rel	links	List4	links.bmp	1	1	466976	1	448	467424
RespPr_MoveS1_150	6	70	rechts	weiblich	87	3	unrel	links	List4	rechts.bmp	1	3	469002	3	389	469391
RespPr_MoveS1_150	6	70	rechts	weiblich	88	3	rel	rechts	List4	rechts.bmp	1	3	470975	3	416	471391
RespPr_MoveS1_150	6	70	rechts	weiblich	89	1	unrel	rechts	List4	links.bmp	1	1	472974	1	442	473416
RespPr_MoveS1_150	6	70	rechts	weiblich	90	3	rel	rechts	List4	rechts.bmp	1	3	475000	3	368	475368
RespPr_MoveS1_150	6	70	rechts	weiblich	91	1	rel	links	List4	links.bmp	1	1	476946	1	462	477408
RespPr_MoveS1_150	6	70	rechts	weiblich	92	3	rel	rechts	List4	rechts.bmp	1	3	478986	3	382	479368
RespPr_MoveS1_150	6	70	rechts	weiblich	93	1	neuInnen	neutralInnen	List4	links.bmp	1	1	480945	1	503	481448
RespPr_MoveS1_150	6	70	rechts	weiblich	94	3	rel	rechts	List4	rechts.bmp	1	3	483024	3	352	483376
RespPr_MoveS1_150	6	70	rechts	weiblich	95	1	neuAussen	neutralAussen	List4	links.bmp	1	1	484957	1	411	485368
RespPr_MoveS1_150	6	70	rechts	weiblich	96	3	unrel	links	List4	rechts.bmp	1	3	486956	3	316	487272
RespPr_MoveS1_150	6	70	rechts	weiblich	97	1	unrel	rechts	List4	links.bmp	1	1	488849	1	439	489288
RespPr_MoveS1_150	6	70	rechts	weiblich	98	3	neuInnen	neutralInnen	List4	rechts.bmp	1	3	490875	3	349	491224
RespPr_MoveS1_150	6	70	rechts	weiblich	99	1	neuAussen	neutralAussen	List4	links.bmp	1	1	492808	1	400	493208
RespPr_MoveS1_150	6	70	rechts	weiblich	100	1	neuAussen	neutralAussen	List4	links.bmp	1	1	494794	1	654	495448
RespPr_MoveS1_150	6	70	rechts	weiblich	101	1	rel	links	List4	links.bmp	1	1	497033	1	439	497472
RespPr_MoveS1_150	6	70	rechts	weiblich	102	3	neuInnen	neutralInnen	List4	rechts.bmp	1	3	499059	3	452	499511
RespPr_MoveS1_150	6	70	rechts	weiblich	103	3	unrel	links	List4	rechts.bmp	1	3	501098	3	342	501440
RespPr_MoveS1_150	6	70	rechts	weiblich	104	1	rel	links	List4	links.bmp	1	1	503018	1	413	503431
RespPr_MoveS1_150	6	70	rechts	weiblich	105	3	neuInnen	neutralInnen	List4	rechts.bmp	1	3	505017	3	391	505408
RespPr_MoveS1_150	6	70	rechts	weiblich	106	3	unrel	links	List4	rechts.bmp	1	3	506990	3	490	507480
RespPr_MoveS1_150	6	70	rechts	weiblich	107	3	rel	rechts	List4	rechts.bmp	1	3	509069	3	394	509463
RespPr_MoveS1_150	6	70	rechts	weiblich	108	1	rel	links	List4	links.bmp	1	1	511042	1	446	511488
RespPr_MoveS1_150	6	70	rechts	weiblich	109	3	rel	rechts	List4	rechts.bmp	1	3	513068	3	483	513551
RespPr_MoveS1_150	6	70	rechts	weiblich	110	1	rel	links	List4	links.bmp	1	1	515134	1	418	515552
RespPr_MoveS1_150	6	70	rechts	weiblich	111	1	unrel	rechts	List4	links.bmp	1	1	517133	1	403	517536
RespPr_MoveS1_150	6	70	rechts	weiblich	112	3	neuAussen	neutralAussen	List4	rechts.bmp	1	3	519119	3	329	519448
RespPr_MoveS1_150	6	70	rechts	weiblich	113	1	unrel	rechts	List4	links.bmp	1	1	521025	1	495	521520
RespPr_MoveS1_150	6	70	rechts	weiblich	114	1	neuInnen	neutralInnen	List4	links.bmp	1	1	523104	1	392	523496
RespPr_MoveS1_150	6	70	rechts	weiblich	115	1	unrel	rechts	List4	links.bmp	1	1	525077	1	387	525464
RespPr_MoveS1_150	6	70	rechts	weiblich	116	1	neuInnen	neutralInnen	List4	links.bmp	1	1	527050	1	374	527424
RespPr_MoveS1_150	6	70	rechts	weiblich	117	3	neuAussen	neutralAussen	List4	rechts.bmp	1	3	529009	3	359	529368
RespPr_MoveS1_150	6	70	rechts	weiblich	118	3	unrel	links	List4	rechts.bmp	1	3	530955	3	372	531327
RespPr_MoveS1_150	6	70	rechts	weiblich	119	1	unrel	rechts	List4	links.bmp	1	1	532914	1	430	533344
RespPr_MoveS1_150	6	70	rechts	weiblich	120	3	neuAussen	neutralAussen	List4	rechts.bmp	1	3	534914	3	374	535288
RespPr_MoveS1_150	6	70	rechts	weiblich	121	1	neuInnen	neutralInnen	List5	links.bmp	1	1	542844	1	460	543304
RespPr_MoveS1_150	6	70	rechts	weiblich	122	1	unrel	rechts	List5	links.bmp	1	1	544884	1	403	545287
RespPr_MoveS1_150	6	70	rechts	weiblich	123	1	rel	links	List5	links.bmp	1	1	546870	1	434	547304
RespPr_MoveS1_150	6	70	rechts	weiblich	124	1	rel	links	List5	links.bmp	1	1	548882	1	398	549280
RespPr_MoveS1_150	6	70	rechts	weiblich	125	1	unrel	rechts	List5	links.bmp	1	1	550868	1	380	551248
RespPr_MoveS1_150	6	70	rechts	weiblich	126	3	rel	rechts	List5	rechts.bmp	1	3	552828	3	492	553320
RespPr_MoveS1_150	6	70	rechts	weiblich	127	3	rel	rechts	List5	rechts.bmp	1	3	554894	3	330	555224
RespPr_MoveS1_150	6	70	rechts	weiblich	128	3	neuInnen	neutralInnen	List5	rechts.bmp	1	3	556800	3	384	557184
RespPr_MoveS1_150	6	70	rechts	weiblich	129	3	neuInnen	neutralInnen	List5	rechts.bmp	1	3	558772	3	388	559160
RespPr_MoveS1_150	6	70	rechts	weiblich	130	1	rel	links	List5	links.bmp	1	1	560745	1	375	561120
RespPr_MoveS1_150	6	70	rechts	weiblich	131	3	unrel	links	List5	rechts.bmp	1	3	562705	3	439	563144
RespPr_MoveS1_150	6	70	rechts	weiblich	132	1	rel	links	List5	links.bmp	1	1	564731	1	421	565152
RespPr_MoveS1_150	6	70	rechts	weiblich	133	1	unrel	rechts	List5	links.bmp	1	1	566730	1	422	567152
RespPr_MoveS1_150	6	70	rechts	weiblich	134	3	unrel	links	List5	rechts.bmp	1	3	568729	3	390	569119
RespPr_MoveS1_150	6	70	rechts	weiblich	135	3	neuAussen	neutralAussen	List5	rechts.bmp	1	3	570702	3	410	571112
RespPr_MoveS1_150	6	70	rechts	weiblich	136	1	unrel	rechts	List5	links.bmp	1	1	572688	1	439	573127
RespPr_MoveS1_150	6	70	rechts	weiblich	137	3	rel	rechts	List5	rechts.bmp	1	3	574714	3	534	575248
RespPr_MoveS1_150	6	70	rechts	weiblich	138	3	rel	rechts	List5	rechts.bmp	1	3	576833	3	430	577263
RespPr_MoveS1_150	6	70	rechts	weiblich	139	1	unrel	rechts	List5	links.bmp	1	1	578846	1	498	579344
RespPr_MoveS1_150	6	70	rechts	weiblich	140	3	neuAussen	neutralAussen	List5	rechts.bmp	1	3	580925	3	371	581296
RespPr_MoveS1_150	6	70	rechts	weiblich	141	1	neuAussen	neutralAussen	List5	links.bmp	1	1	582884	1	420	583304
RespPr_MoveS1_150	6	70	rechts	weiblich	142	1	neuInnen	neutralInnen	List5	links.bmp	1	1	584884	1	364	585248
RespPr_MoveS1_150	6	70	rechts	weiblich	143	3	neuAussen	neutralAussen	List5	rechts.bmp	1	3	586830	3	290	587120
RespPr_MoveS1_150	6	70	rechts	weiblich	144	1	rel	links	List5	links.bmp	1	1	588696	1	520	589216
RespPr_MoveS1_150	6	70	rechts	weiblich	145	1	unrel	rechts	List5	links.bmp	1	1	590802	1	406	591208
RespPr_MoveS1_150	6	70	rechts	weiblich	146	3	unrel	links	List5	rechts.bmp	1	3	592788	3	348	593136
RespPr_MoveS1_150	6	70	rechts	weiblich	147	3	rel	rechts	List5	rechts.bmp	1	3	594721	3	351	595072
RespPr_MoveS1_150	6	70	rechts	weiblich	148	1	neuAussen	neutralAussen	List5	links.bmp	1	1	596653	1	330	596983
RespPr_MoveS1_150	6	70	rechts	weiblich	149	3	unrel	links	List5	rechts.bmp	1	3	598559	3	329	598888
RespPr_MoveS1_150	6	70	rechts	weiblich	150	1	neuInnen	neutralInnen	List5	links.bmp	1	1	600465	1	423	600888
RespPr_MoveS1_150	6	70	rechts	weiblich	151	1	rel	links	List5	links.bmp	1	1	602465	1	334	602799
RespPr_MoveS1_150	6	70	rechts	weiblich	152	3	rel	rechts	List5	rechts.bmp	1	3	604371	3	380	604751
RespPr_MoveS1_150	6	70	rechts	weiblich	153	3	neuInnen	neutralInnen	List5	rechts.bmp	1	3	606317	3	395	606712
RespPr_MoveS1_150	6	70	rechts	weiblich	154	1	neuAussen	neutralAussen	List5	links.bmp	1	1	608289	1	447	608736
RespPr_MoveS1_150	6	70	rechts	weiblich	155	3	unrel	links	List5	rechts.bmp	1	3	610315	3	380	610695
RespPr_MoveS1_150	6	70	rechts	weiblich	156	3	unrel	links	List5	rechts.bmp	1	3	612275	3	325	612600
RespPr_MoveS1_150	7	63	rechts	weiblich	1	3	unrel	links	List1	rechts.bmp	1	3	96270	3	626	96896
RespPr_MoveS1_150	7	63	rechts	weiblich	2	3	neuAussen	neutralAussen	List1	rechts.bmp	1	3	98482	3	462	98944
RespPr_MoveS1_150	7	63	rechts	weiblich	3	3	rel	rechts	List1	rechts.bmp	1	3	100521	3	503	101024
RespPr_MoveS1_150	7	63	rechts	weiblich	4	1	rel	links	List1	links.bmp	1	1	102601	1	463	103064
RespPr_MoveS1_150	7	63	rechts	weiblich	5	1	unrel	rechts	List1	links.bmp	1	1	104627	1	605	105232
RespPr_MoveS1_150	7	63	rechts	weiblich	6	3	neuInnen	neutralInnen	List1	rechts.bmp	1	3	106813	3	475	107288
RespPr_MoveS1_150	7	63	rechts	weiblich	7	3	unrel	links	List1	rechts.bmp	1	3	108865	3	494	109359
RespPr_MoveS1_150	7	63	rechts	weiblich	8	1	rel	links	List1	links.bmp	1	1	110945	1	566	111511
RespPr_MoveS1_150	7	63	rechts	weiblich	9	1	unrel	rechts	List1	links.bmp	1	1	113091	1	653	113744
RespPr_MoveS1_150	7	63	rechts	weiblich	10	1	neuAussen	neutralAussen	List1	links.bmp	1	1	115343	1	553	115896
RespPr_MoveS1_150	7	63	rechts	weiblich	11	1	neuInnen	neutralInnen	List1	links.bmp	1	1	117476	1	580	118056
RespPr_MoveS1_150	7	63	rechts	weiblich	12	3	rel	rechts	List1	rechts.bmp	1	3	119635	3	453	120088
RespPr_MoveS1_150	7	63	rechts	weiblich	13	1	neuInnen	neutralInnen	List2	links.bmp	1	1	136150	1	626	136776
RespPr_MoveS1_150	7	63	rechts	weiblich	14	3	rel	rechts	List2	rechts.bmp	1	3	138362	3	454	138816
RespPr_MoveS1_150	7	63	rechts	weiblich	15	1	rel	links	List2	links.bmp	1	1	140402	1	454	140856
RespPr_MoveS1_150	7	63	rechts	weiblich	16	3	rel	rechts	List2	rechts.bmp	1	3	142441	3	423	142864
RespPr_MoveS1_150	7	63	rechts	weiblich	17	3	unrel	links	List2	rechts.bmp	1	3	144440	3	568	145008
RespPr_MoveS1_150	7	63	rechts	weiblich	18	3	unrel	links	List2	rechts.bmp	1	3	146586	3	541	147127
RespPr_MoveS1_150	7	63	rechts	weiblich	19	3	rel	rechts	List2	rechts.bmp	1	3	148706	3	510	149216
RespPr_MoveS1_150	7	63	rechts	weiblich	20	1	unrel	rechts	List2	links.bmp	1	1	150798	1	538	151336
RespPr_MoveS1_150	7	63	rechts	weiblich	21	1	rel	links	List2	links.bmp	1	1	152917	1	731	153648
RespPr_MoveS1_150	7	63	rechts	weiblich	22	1	rel	links	List2	links.bmp	1	1	155237	1	587	155824
RespPr_MoveS1_150	7	63	rechts	weiblich	23	1	neuAussen	neutralAussen	List2	links.bmp	1	1	157409	1	567	157976
RespPr_MoveS1_150	7	63	rechts	weiblich	24	1	neuAussen	neutralAussen	List2	links.bmp	1	1	159555	1	557	160112
RespPr_MoveS1_150	7	63	rechts	weiblich	25	1	rel	links	List2	links.bmp	1	1	161688	1	464	162152
RespPr_MoveS1_150	7	63	rechts	weiblich	26	1	neuInnen	neutralInnen	List2	links.bmp	1	1	163741	1	475	164216
RespPr_MoveS1_150	7	63	rechts	weiblich	27	1	unrel	rechts	List2	links.bmp	1	1	165793	1	542	166335
RespPr_MoveS1_150	7	63	rechts	weiblich	28	3	rel	rechts	List2	rechts.bmp	1	3	167913	3	543	168456
RespPr_MoveS1_150	7	63	rechts	weiblich	29	3	unrel	links	List2	rechts.bmp	1	3	170032	3	584	170616
RespPr_MoveS1_150	7	63	rechts	weiblich	30	1	unrel	rechts	List2	links.bmp	1	1	172204	1	604	172808
RespPr_MoveS1_150	7	63	rechts	weiblich	31	1	unrel	rechts	List2	links.bmp	1	1	174390	1	617	175007
RespPr_MoveS1_150	7	63	rechts	weiblich	32	3	neuAussen	neutralAussen	List2	rechts.bmp	1	3	176590	3	418	177008
RespPr_MoveS1_150	7	63	rechts	weiblich	33	3	neuInnen	neutralInnen	List2	rechts.bmp	1	3	178589	3	506	179095
RespPr_MoveS1_150	7	63	rechts	weiblich	34	3	unrel	links	List2	rechts.bmp	1	3	180682	3	550	181232
RespPr_MoveS1_150	7	63	rechts	weiblich	35	3	unrel	links	List2	rechts.bmp	1	3	182814	3	482	183296
RespPr_MoveS1_150	7	63	rechts	weiblich	36	3	neuInnen	neutralInnen	List2	rechts.bmp	1	3	184880	3	424	185304
RespPr_MoveS1_150	7	63	rechts	weiblich	37	3	rel	rechts	List2	rechts.bmp	1	3	186893	3	427	187320
RespPr_MoveS1_150	7	63	rechts	weiblich	38	1	rel	links	List2	links.bmp	1	1	188906	1	526	189432
RespPr_MoveS1_150	7	63	rechts	weiblich	39	1	neuInnen	neutralInnen	List2	links.bmp	1	1	191012	1	547	191559
RespPr_MoveS1_150	7	63	rechts	weiblich	40	3	rel	rechts	List2	rechts.bmp	1	3	193144	3	480	193624
RespPr_MoveS1_150	7	63	rechts	weiblich	41	3	unrel	links	List2	rechts.bmp	1	3	195210	3	502	195712
RespPr_MoveS1_150	7	63	rechts	weiblich	42	1	rel	links	List2	links.bmp	1	1	197289	1	559	197848
RespPr_MoveS1_150	7	63	rechts	weiblich	43	1	unrel	rechts	List2	links.bmp	1	1	199435	1	517	199952
RespPr_MoveS1_150	7	63	rechts	weiblich	44	1	unrel	rechts	List2	links.bmp	1	1	201515	1	565	202080
RespPr_MoveS1_150	7	63	rechts	weiblich	45	3	neuAussen	neutralAussen	List2	rechts.bmp	1	3	203661	3	475	204136
RespPr_MoveS1_150	7	63	rechts	weiblich	46	1	neuAussen	neutralAussen	List2	links.bmp	1	1	205713	1	591	206304
RespPr_MoveS1_150	7	63	rechts	weiblich	47	3	neuInnen	neutralInnen	List2	rechts.bmp	1	3	207886	3	649	208535
RespPr_MoveS1_150	7	63	rechts	weiblich	48	3	neuAussen	neutralAussen	List2	rechts.bmp	1	3	210112	3	504	210616
RespPr_MoveS1_150	7	63	rechts	weiblich	49	3	rel	rechts	List3	rechts.bmp	1	3	222548	3	450	222998
RespPr_MoveS1_150	7	63	rechts	weiblich	50	3	rel	rechts	List3	rechts.bmp	1	3	224574	3	370	224944
RespPr_MoveS1_150	7	63	rechts	weiblich	51	3	neuAussen	neutralAussen	List3	rechts.bmp	1	3	226520	3	399	226919
RespPr_MoveS1_150	7	63	rechts	weiblich	52	3	neuAussen	neutralAussen	List3	rechts.bmp	1	3	228506	3	446	228952
RespPr_MoveS1_150	7	63	rechts	weiblich	53	1	neuAussen	neutralAussen	List3	links.bmp	1	1	230532	1	579	231111
RespPr_MoveS1_150	7	63	rechts	weiblich	54	3	unrel	links	List3	rechts.bmp	1	3	232678	3	458	233136
RespPr_MoveS1_150	7	63	rechts	weiblich	55	3	unrel	links	List3	rechts.bmp	1	3	234704	3	480	235184
RespPr_MoveS1_150	7	63	rechts	weiblich	56	1	neuInnen	neutralInnen	List3	links.bmp	1	1	236770	1	581	237351
RespPr_MoveS1_150	7	63	rechts	weiblich	57	1	rel	links	List3	links.bmp	1	1	238916	1	572	239488
RespPr_MoveS1_150	7	63	rechts	weiblich	58	1	rel	links	List3	links.bmp	1	1	241062	1	529	241591
RespPr_MoveS1_150	7	63	rechts	weiblich	59	3	neuInnen	neutralInnen	List3	rechts.bmp	1	3	243168	3	440	243608
RespPr_MoveS1_150	7	63	rechts	weiblich	60	3	neuInnen	neutralInnen	List3	rechts.bmp	1	3	245194	3	470	245664
RespPr_MoveS1_150	7	63	rechts	weiblich	61	1	unrel	rechts	List3	links.bmp	1	1	247246	1	594	247840
RespPr_MoveS1_150	7	63	rechts	weiblich	62	1	unrel	rechts	List3	links.bmp	1	1	249419	1	517	249936
RespPr_MoveS1_150	7	63	rechts	weiblich	63	1	rel	links	List3	links.bmp	1	1	251525	1	514	252039
RespPr_MoveS1_150	7	63	rechts	weiblich	64	1	unrel	rechts	List3	links.bmp	1	1	253618	1	470	254088
RespPr_MoveS1_150	7	63	rechts	weiblich	65	3	unrel	links	List3	rechts.bmp	1	3	255670	3	490	256160
RespPr_MoveS1_150	7	63	rechts	weiblich	66	1	neuAussen	neutralAussen	List3	links.bmp	1	1	257736	1	512	258248
RespPr_MoveS1_150	7	63	rechts	weiblich	67	3	rel	rechts	List3	rechts.bmp	1	3	259829	3	459	260288
RespPr_MoveS1_150	7	63	rechts	weiblich	68	1	unrel	rechts	List3	links.bmp	1	1	261855	1	633	262488
RespPr_MoveS1_150	7	63	rechts	weiblich	69	3	unrel	links	List3	rechts.bmp	1	3	264067	3	469	264536
RespPr_MoveS1_150	7	63	rechts	weiblich	70	1	neuInnen	neutralInnen	List3	links.bmp	1	1	266107	1	453	266560
RespPr_MoveS1_150	7	63	rechts	weiblich	71	1	neuAussen	neutralAussen	List3	links.bmp	1	1	268133	1	475	268608
RespPr_MoveS1_150	7	63	rechts	weiblich	72	3	rel	rechts	List3	rechts.bmp	1	3	270185	3	463	270648
RespPr_MoveS1_150	7	63	rechts	weiblich	73	3	rel	rechts	List3	rechts.bmp	1	3	272225	3	591	272816
RespPr_MoveS1_150	7	63	rechts	weiblich	74	1	rel	links	List3	links.bmp	1	1	274397	1	523	274920
RespPr_MoveS1_150	7	63	rechts	weiblich	75	3	rel	rechts	List3	rechts.bmp	1	3	276503	3	497	277000
RespPr_MoveS1_150	7	63	rechts	weiblich	76	1	rel	links	List3	links.bmp	1	1	278583	1	481	279064
RespPr_MoveS1_150	7	63	rechts	weiblich	77	3	neuInnen	neutralInnen	List3	rechts.bmp	1	3	280649	3	631	281280
RespPr_MoveS1_150	7	63	rechts	weiblich	78	3	unrel	links	List3	rechts.bmp	1	3	282861	3	483	283344
RespPr_MoveS1_150	7	63	rechts	weiblich	79	3	neuAussen	neutralAussen	List3	rechts.bmp	1	3	284927	3	489	285416
RespPr_MoveS1_150	7	63	rechts	weiblich	80	1	unrel	rechts	List3	links.bmp	1	1	286993	1	535	287528
RespPr_MoveS1_150	7	63	rechts	weiblich	81	1	neuInnen	neutralInnen	List3	links.bmp	1	1	289112	1	592	289704
RespPr_MoveS1_150	7	63	rechts	weiblich	82	1	unrel	rechts	List3	links.bmp	1	1	291272	1	616	291888
RespPr_MoveS1_150	7	63	rechts	weiblich	83	1	rel	links	List3	links.bmp	1	1	293458	1	606	294064
RespPr_MoveS1_150	7	63	rechts	weiblich	84	3	unrel	links	List3	rechts.bmp	1	3	295644	3	507	296151
RespPr_MoveS1_150	7	63	rechts	weiblich	85	3	neuAussen	neutralAussen	List4	rechts.bmp	1	3	331259	3	485	331744
RespPr_MoveS1_150	7	63	rechts	weiblich	86	3	unrel	links	List4	rechts.bmp	1	3	333324	3	468	333792
RespPr_MoveS1_150	7	63	rechts	weiblich	87	1	neuInnen	neutralInnen	List4	links.bmp	1	1	335377	1	550	335927
RespPr_MoveS1_150	7	63	rechts	weiblich	88	3	unrel	links	List4	rechts.bmp	1	3	337510	3	530	338040
RespPr_MoveS1_150	7	63	rechts	weiblich	89	3	unrel	links	List4	rechts.bmp	1	3	339616	3	456	340072
RespPr_MoveS1_150	7	63	rechts	weiblich	90	3	rel	rechts	List4	rechts.bmp	1	3	341642	3	534	342176
RespPr_MoveS1_150	7	63	rechts	weiblich	91	1	rel	links	List4	links.bmp	1	1	343748	1	540	344288
RespPr_MoveS1_150	7	63	rechts	weiblich	92	3	rel	rechts	List4	rechts.bmp	1	3	345854	3	426	346280
RespPr_MoveS1_150	7	63	rechts	weiblich	93	1	unrel	rechts	List4	links.bmp	1	1	347866	1	590	348456
RespPr_MoveS1_150	7	63	rechts	weiblich	94	3	neuAussen	neutralAussen	List4	rechts.bmp	1	3	350039	3	449	350488
RespPr_MoveS1_150	7	63	rechts	weiblich	95	1	unrel	rechts	List4	links.bmp	1	1	352052	1	483	352535
RespPr_MoveS1_150	7	63	rechts	weiblich	96	3	rel	rechts	List4	rechts.bmp	1	3	354118	3	418	354536
RespPr_MoveS1_150	7	63	rechts	weiblich	97	1	neuAussen	neutralAussen	List4	links.bmp	1	1	356117	1	539	356656
RespPr_MoveS1_150	7	63	rechts	weiblich	98	3	neuInnen	neutralInnen	List4	rechts.bmp	1	3	358236	3	548	358784
RespPr_MoveS1_150	7	63	rechts	weiblich	99	1	unrel	rechts	List4	links.bmp	1	1	360369	1	470	360839
RespPr_MoveS1_150	7	63	rechts	weiblich	100	1	neuInnen	neutralInnen	List4	links.bmp	1	1	362422	1	634	363056
RespPr_MoveS1_150	7	63	rechts	weiblich	101	3	unrel	links	List4	rechts.bmp	1	3	364634	3	470	365104
RespPr_MoveS1_150	7	63	rechts	weiblich	102	3	rel	rechts	List4	rechts.bmp	1	3	366687	3	473	367160
RespPr_MoveS1_150	7	63	rechts	weiblich	103	1	rel	links	List4	links.bmp	1	1	368739	1	725	369464
RespPr_MoveS1_150	7	63	rechts	weiblich	104	1	neuInnen	neutralInnen	List4	links.bmp	1	1	371045	1	562	371607
RespPr_MoveS1_150	7	63	rechts	weiblich	105	1	rel	links	List4	links.bmp	1	1	373191	1	497	373688
RespPr_MoveS1_150	7	63	rechts	weiblich	106	3	unrel	links	List4	rechts.bmp	1	3	375271	3	497	375768
RespPr_MoveS1_150	7	63	rechts	weiblich	107	1	neuAussen	neutralAussen	List4	links.bmp	1	1	377350	1	522	377872
RespPr_MoveS1_150	7	63	rechts	weiblich	108	3	neuInnen	neutralInnen	List4	rechts.bmp	1	3	379456	3	496	379952
RespPr_MoveS1_150	7	63	rechts	weiblich	109	1	neuAussen	neutralAussen	List4	links.bmp	1	1	381535	1	593	382128
RespPr_MoveS1_150	7	63	rechts	weiblich	110	1	rel	links	List4	links.bmp	1	1	383708	1	708	384416
RespPr_MoveS1_150	7	63	rechts	weiblich	111	3	rel	rechts	List4	rechts.bmp	1	3	386000	3	696	386696
RespPr_MoveS1_150	7	63	rechts	weiblich	112	3	neuAussen	neutralAussen	List4	rechts.bmp	1	3	388280	3	496	388776
RespPr_MoveS1_150	7	63	rechts	weiblich	113	1	unrel	rechts	List4	links.bmp	1	1	390359	1	529	390888
RespPr_MoveS1_150	7	63	rechts	weiblich	114	1	rel	links	List4	links.bmp	1	1	392465	1	551	393016
RespPr_MoveS1_150	7	63	rechts	weiblich	115	3	rel	rechts	List4	rechts.bmp	1	3	394598	3	609	395207
RespPr_MoveS1_150	7	63	rechts	weiblich	116	1	unrel	rechts	List4	links.bmp	1	1	396784	1	559	397343
RespPr_MoveS1_150	7	63	rechts	weiblich	117	3	neuInnen	neutralInnen	List4	rechts.bmp	1	3	398929	3	495	399424
RespPr_MoveS1_150	7	63	rechts	weiblich	118	1	unrel	rechts	List4	links.bmp	1	1	401009	1	527	401536
RespPr_MoveS1_150	7	63	rechts	weiblich	119	3	unrel	links	List4	rechts.bmp	1	3	403115	3	469	403584
RespPr_MoveS1_150	7	63	rechts	weiblich	120	1	rel	links	List4	links.bmp	1	1	405167	1	625	405792
RespPr_MoveS1_150	7	63	rechts	weiblich	121	3	neuInnen	neutralInnen	List5	rechts.bmp	1	3	427493	3	499	427992
RespPr_MoveS1_150	7	63	rechts	weiblich	122	3	neuInnen	neutralInnen	List5	rechts.bmp	1	3	429573	3	498	430071
RespPr_MoveS1_150	7	63	rechts	weiblich	123	1	unrel	rechts	List5	links.bmp	1	1	431639	1	633	432272
RespPr_MoveS1_150	7	63	rechts	weiblich	124	3	rel	rechts	List5	rechts.bmp	1	3	433851	3	485	434336
RespPr_MoveS1_150	7	63	rechts	weiblich	125	1	rel	links	List5	links.bmp	1	1	435917	1	563	436480
RespPr_MoveS1_150	7	63	rechts	weiblich	126	3	rel	rechts	List5	rechts.bmp	1	3	438063	3	481	438544
RespPr_MoveS1_150	7	63	rechts	weiblich	127	3	rel	rechts	List5	rechts.bmp	1	3	440129	3	567	440696
RespPr_MoveS1_150	7	63	rechts	weiblich	128	3	unrel	links	List5	rechts.bmp	1	3	442275	3	477	442752
RespPr_MoveS1_150	7	63	rechts	weiblich	129	1	unrel	rechts	List5	links.bmp	1	1	444328	1	551	444879
RespPr_MoveS1_150	7	63	rechts	weiblich	130	3	rel	rechts	List5	rechts.bmp	1	3	446460	3	515	446975
RespPr_MoveS1_150	7	63	rechts	weiblich	131	3	rel	rechts	List5	rechts.bmp	1	3	448540	3	404	448944
RespPr_MoveS1_150	7	63	rechts	weiblich	132	3	neuAussen	neutralAussen	List5	rechts.bmp	1	3	450526	3	545	451071
RespPr_MoveS1_150	7	63	rechts	weiblich	133	3	neuAussen	neutralAussen	List5	rechts.bmp	1	3	452658	3	485	453143
RespPr_MoveS1_150	7	63	rechts	weiblich	134	3	neuInnen	neutralInnen	List5	rechts.bmp	1	3	454724	3	547	455271
RespPr_MoveS1_150	7	63	rechts	weiblich	135	1	unrel	rechts	List5	links.bmp	1	1	456857	1	599	457456
RespPr_MoveS1_150	7	63	rechts	weiblich	136	3	unrel	links	List5	rechts.bmp	1	3	459043	3	397	459440
RespPr_MoveS1_150	7	63	rechts	weiblich	137	3	unrel	links	List5	rechts.bmp	1	3	461029	3	451	461480
RespPr_MoveS1_150	7	63	rechts	weiblich	138	1	neuInnen	neutralInnen	List5	links.bmp	1	1	463068	1	596	463664
RespPr_MoveS1_150	7	63	rechts	weiblich	139	3	rel	rechts	List5	rechts.bmp	1	3	465241	3	399	465640
RespPr_MoveS1_150	7	63	rechts	weiblich	140	1	neuAussen	neutralAussen	List5	links.bmp	1	1	467227	1	429	467656
RespPr_MoveS1_150	7	63	rechts	weiblich	141	1	neuInnen	neutralInnen	List5	links.bmp	1	1	469240	1	519	469759
RespPr_MoveS1_150	7	63	rechts	weiblich	142	1	unrel	rechts	List5	links.bmp	1	1	471346	1	558	471904
RespPr_MoveS1_150	7	63	rechts	weiblich	143	3	unrel	links	List5	rechts.bmp	1	3	473491	3	557	474048
RespPr_MoveS1_150	7	63	rechts	weiblich	144	3	neuAussen	neutralAussen	List5	rechts.bmp	1	3	475611	3	493	476104
RespPr_MoveS1_150	7	63	rechts	weiblich	145	1	rel	links	List5	links.bmp	1	1	477677	1	506	478183
RespPr_MoveS1_150	7	63	rechts	weiblich	146	3	unrel	links	List5	rechts.bmp	1	3	479769	3	607	480376
RespPr_MoveS1_150	7	63	rechts	weiblich	147	1	unrel	rechts	List5	links.bmp	1	1	481955	1	549	482504
RespPr_MoveS1_150	7	63	rechts	weiblich	148	1	rel	links	List5	links.bmp	1	1	484088	1	640	484728
RespPr_MoveS1_150	7	63	rechts	weiblich	149	1	neuInnen	neutralInnen	List5	links.bmp	1	1	486314	1	558	486872
RespPr_MoveS1_150	7	63	rechts	weiblich	150	1	rel	links	List5	links.bmp	1	1	488460	1	508	488968
RespPr_MoveS1_150	7	63	rechts	weiblich	151	1	neuAussen	neutralAussen	List5	links.bmp	1	1	490552	1	544	491096
RespPr_MoveS1_150	7	63	rechts	weiblich	152	3	unrel	links	List5	rechts.bmp	1	3	492672	3	688	493360
RespPr_MoveS1_150	7	63	rechts	weiblich	153	1	rel	links	List5	links.bmp	1	1	494938	1	526	495464
RespPr_MoveS1_150	7	63	rechts	weiblich	154	1	neuAussen	neutralAussen	List5	links.bmp	1	1	497044	1	676	497720
RespPr_MoveS1_150	7	63	rechts	weiblich	155	1	unrel	rechts	List5	links.bmp	1	1	499296	1	608	499904
RespPr_MoveS1_150	7	63	rechts	weiblich	156	1	rel	links	List5	links.bmp	1	1	501482	1	566	502048
RespPr_MoveS1_150	8	65	rechts	maennlich	1	3	rel	rechts	List1	rechts.bmp	1	3	122016	3	735	122751
RespPr_MoveS1_150	8	65	rechts	maennlich	2	1	unrel	rechts	List1	links.bmp	1	1	124336	1	495	124831
RespPr_MoveS1_150	8	65	rechts	maennlich	3	1	neuAussen	neutralAussen	List1	links.bmp	1	1	126402	1	605	127007
RespPr_MoveS1_150	8	65	rechts	maennlich	4	1	neuInnen	neutralInnen	List1	links.bmp	1	1	128588	1	483	129071
RespPr_MoveS1_150	8	65	rechts	maennlich	5	1	rel	links	List1	links.bmp	1	1	130654	1	338	130992
RespPr_MoveS1_150	8	65	rechts	maennlich	6	3	neuInnen	neutralInnen	List1	rechts.bmp	1	3	132573	3	466	133039
RespPr_MoveS1_150	8	65	rechts	maennlich	7	1	unrel	rechts	List1	links.bmp	1	1	134626	1	365	134991
RespPr_MoveS1_150	8	65	rechts	maennlich	8	1	rel	links	List1	links.bmp	1	1	136572	1	379	136951
RespPr_MoveS1_150	8	65	rechts	maennlich	9	3	rel	rechts	List1	rechts.bmp	1	3	138531	3	356	138887
RespPr_MoveS1_150	8	65	rechts	maennlich	10	3	neuAussen	neutralAussen	List1	rechts.bmp	0	3	140464	1	95	140559
RespPr_MoveS1_150	8	65	rechts	maennlich	11	3	unrel	links	List1	rechts.bmp	1	3	142130	3	565	142695
RespPr_MoveS1_150	8	65	rechts	maennlich	12	3	unrel	links	List1	rechts.bmp	1	3	144276	3	467	144743
RespPr_MoveS1_150	8	65	rechts	maennlich	13	3	rel	rechts	List2	rechts.bmp	1	3	167655	3	936	168591
RespPr_MoveS1_150	8	65	rechts	maennlich	14	3	unrel	links	List2	rechts.bmp	1	3	170174	3	473	170647
RespPr_MoveS1_150	8	65	rechts	maennlich	15	3	neuInnen	neutralInnen	List2	rechts.bmp	1	3	172227	3	420	172647
RespPr_MoveS1_150	8	65	rechts	maennlich	16	1	unrel	rechts	List2	links.bmp	1	1	174226	1	453	174679
RespPr_MoveS1_150	8	65	rechts	maennlich	17	1	neuInnen	neutralInnen	List2	links.bmp	1	1	176265	1	462	176727
RespPr_MoveS1_150	8	65	rechts	maennlich	18	1	unrel	rechts	List2	links.bmp	1	1	178304	1	431	178735
RespPr_MoveS1_150	8	65	rechts	maennlich	19	1	neuAussen	neutralAussen	List2	links.bmp	1	1	180317	1	394	180711
RespPr_MoveS1_150	8	65	rechts	maennlich	20	3	rel	rechts	List2	rechts.bmp	1	3	182290	3	397	182687
RespPr_MoveS1_150	8	65	rechts	maennlich	21	3	neuAussen	neutralAussen	List2	rechts.bmp	1	3	184276	3	538	184814
RespPr_MoveS1_150	8	65	rechts	maennlich	22	3	rel	rechts	List2	rechts.bmp	1	3	186395	3	404	186799
RespPr_MoveS1_150	8	65	rechts	maennlich	23	1	unrel	rechts	List2	links.bmp	1	1	188381	1	490	188871
RespPr_MoveS1_150	8	65	rechts	maennlich	24	3	unrel	links	List2	rechts.bmp	1	3	190447	3	609	191056
RespPr_MoveS1_150	8	65	rechts	maennlich	25	1	unrel	rechts	List2	links.bmp	1	1	192620	1	482	193102
RespPr_MoveS1_150	8	65	rechts	maennlich	26	3	unrel	links	List2	rechts.bmp	1	3	194686	3	385	195071
RespPr_MoveS1_150	8	65	rechts	maennlich	27	3	rel	rechts	List2	rechts.bmp	1	3	196658	3	485	197143
RespPr_MoveS1_150	8	65	rechts	maennlich	28	1	rel	links	List2	links.bmp	1	1	198724	1	371	199095
RespPr_MoveS1_150	8	65	rechts	maennlich	29	3	neuInnen	neutralInnen	List2	rechts.bmp	1	3	200684	3	395	201079
RespPr_MoveS1_150	8	65	rechts	maennlich	30	1	rel	links	List2	links.bmp	1	1	202656	1	351	203007
RespPr_MoveS1_150	8	65	rechts	maennlich	31	1	neuAussen	neutralAussen	List2	links.bmp	1	1	204589	1	482	205071
RespPr_MoveS1_150	8	65	rechts	maennlich	32	1	rel	links	List2	links.bmp	1	1	206642	1	605	207247
RespPr_MoveS1_150	8	65	rechts	maennlich	33	3	neuInnen	neutralInnen	List2	rechts.bmp	1	3	208828	3	427	209255
RespPr_MoveS1_150	8	65	rechts	maennlich	34	1	rel	links	List2	links.bmp	1	1	210840	1	431	211271
RespPr_MoveS1_150	8	65	rechts	maennlich	35	1	unrel	rechts	List2	links.bmp	1	1	212840	1	439	213279
RespPr_MoveS1_150	8	65	rechts	maennlich	36	1	unrel	rechts	List2	links.bmp	1	1	214866	1	341	215207
RespPr_MoveS1_150	8	65	rechts	maennlich	37	3	neuAussen	neutralAussen	List2	rechts.bmp	1	3	216772	3	451	217223
RespPr_MoveS1_150	8	65	rechts	maennlich	38	3	unrel	links	List2	rechts.bmp	1	3	218798	3	409	219207
RespPr_MoveS1_150	8	65	rechts	maennlich	39	1	rel	links	List2	links.bmp	1	1	220784	1	439	221223
RespPr_MoveS1_150	8	65	rechts	maennlich	40	3	rel	rechts	List2	rechts.bmp	1	3	222810	3	349	223159
RespPr_MoveS1_150	8	65	rechts	maennlich	41	1	neuInnen	neutralInnen	List2	links.bmp	1	1	224742	1	305	225047
RespPr_MoveS1_150	8	65	rechts	maennlich	42	1	rel	links	List2	links.bmp	1	1	226635	1	460	227095
RespPr_MoveS1_150	8	65	rechts	maennlich	43	3	neuAussen	neutralAussen	List2	rechts.bmp	1	3	228675	3	348	229023
RespPr_MoveS1_150	8	65	rechts	maennlich	44	3	unrel	links	List2	rechts.bmp	1	3	230607	3	576	231183
RespPr_MoveS1_150	8	65	rechts	maennlich	45	3	unrel	links	List2	rechts.bmp	1	3	232766	3	473	233239
RespPr_MoveS1_150	8	65	rechts	maennlich	46	1	neuAussen	neutralAussen	List2	links.bmp	1	1	234819	1	348	235167
RespPr_MoveS1_150	8	65	rechts	maennlich	47	1	neuInnen	neutralInnen	List2	links.bmp	1	1	236752	1	399	237151
RespPr_MoveS1_150	8	65	rechts	maennlich	48	3	rel	rechts	List2	rechts.bmp	1	3	238738	3	357	239095
RespPr_MoveS1_150	8	65	rechts	maennlich	49	3	unrel	links	List3	rechts.bmp	1	3	292867	3	508	293375
RespPr_MoveS1_150	8	65	rechts	maennlich	50	3	unrel	links	List3	rechts.bmp	1	3	294959	3	400	295359
RespPr_MoveS1_150	8	65	rechts	maennlich	51	1	rel	links	List3	links.bmp	1	1	296945	1	438	297383
RespPr_MoveS1_150	8	65	rechts	maennlich	52	3	rel	rechts	List3	rechts.bmp	1	3	298971	3	340	299311
RespPr_MoveS1_150	8	65	rechts	maennlich	53	1	unrel	rechts	List3	links.bmp	1	1	300891	1	332	301223
RespPr_MoveS1_150	8	65	rechts	maennlich	54	1	neuInnen	neutralInnen	List3	links.bmp	1	1	302797	1	354	303151
RespPr_MoveS1_150	8	65	rechts	maennlich	55	3	neuInnen	neutralInnen	List3	rechts.bmp	1	3	304729	3	374	305103
RespPr_MoveS1_150	8	65	rechts	maennlich	56	1	rel	links	List3	links.bmp	1	1	306689	1	366	307055
RespPr_MoveS1_150	8	65	rechts	maennlich	57	3	rel	rechts	List3	rechts.bmp	1	3	308635	3	324	308959
RespPr_MoveS1_150	8	65	rechts	maennlich	58	3	rel	rechts	List3	rechts.bmp	0	3	310541	1	314	310855
RespPr_MoveS1_150	8	65	rechts	maennlich	59	1	neuInnen	neutralInnen	List3	links.bmp	1	1	312433	1	622	313055
RespPr_MoveS1_150	8	65	rechts	maennlich	60	3	rel	rechts	List3	rechts.bmp	1	3	314633	3	430	315063
RespPr_MoveS1_150	8	65	rechts	maennlich	61	3	unrel	links	List3	rechts.bmp	1	3	316645	3	538	317183
RespPr_MoveS1_150	8	65	rechts	maennlich	62	1	neuAussen	neutralAussen	List3	links.bmp	1	1	318765	1	450	319215
RespPr_MoveS1_150	8	65	rechts	maennlich	63	1	rel	links	List3	links.bmp	1	1	320791	1	432	321223
RespPr_MoveS1_150	8	65	rechts	maennlich	64	3	rel	rechts	List3	rechts.bmp	1	3	322803	3	404	323207
RespPr_MoveS1_150	8	65	rechts	maennlich	65	3	neuInnen	neutralInnen	List3	rechts.bmp	1	3	324789	3	451	325240
RespPr_MoveS1_150	8	65	rechts	maennlich	66	3	unrel	links	List3	rechts.bmp	1	3	326829	3	513	327342
RespPr_MoveS1_150	8	65	rechts	maennlich	67	1	unrel	rechts	List3	links.bmp	1	1	328921	1	407	329328
RespPr_MoveS1_150	8	65	rechts	maennlich	68	1	rel	links	List3	links.bmp	1	1	330907	1	468	331375
RespPr_MoveS1_150	8	65	rechts	maennlich	69	3	neuAussen	neutralAussen	List3	rechts.bmp	1	3	332947	3	380	333327
RespPr_MoveS1_150	8	65	rechts	maennlich	70	1	unrel	rechts	List3	links.bmp	1	1	334893	1	386	335279
RespPr_MoveS1_150	8	65	rechts	maennlich	71	3	unrel	links	List3	rechts.bmp	1	3	336865	3	414	337279
RespPr_MoveS1_150	8	65	rechts	maennlich	72	1	unrel	rechts	List3	links.bmp	1	1	338865	1	519	339384
RespPr_MoveS1_150	8	65	rechts	maennlich	73	3	unrel	links	List3	rechts.bmp	1	3	340971	3	372	341343
RespPr_MoveS1_150	8	65	rechts	maennlich	74	1	rel	links	List3	links.bmp	1	1	342917	1	386	343303
RespPr_MoveS1_150	8	65	rechts	maennlich	75	1	unrel	rechts	List3	links.bmp	1	1	344889	1	518	345407
RespPr_MoveS1_150	8	65	rechts	maennlich	76	3	neuAussen	neutralAussen	List3	rechts.bmp	1	3	346995	3	388	347383
RespPr_MoveS1_150	8	65	rechts	maennlich	77	1	neuAussen	neutralAussen	List3	links.bmp	1	1	348955	1	388	349343
RespPr_MoveS1_150	8	65	rechts	maennlich	78	1	neuAussen	neutralAussen	List3	links.bmp	1	1	350927	1	456	351383
RespPr_MoveS1_150	8	65	rechts	maennlich	79	1	rel	links	List3	links.bmp	1	1	352967	1	392	353359
RespPr_MoveS1_150	8	65	rechts	maennlich	80	3	neuInnen	neutralInnen	List3	rechts.bmp	1	3	354939	3	516	355455
RespPr_MoveS1_150	8	65	rechts	maennlich	81	3	rel	rechts	List3	rechts.bmp	1	3	357019	3	492	357511
RespPr_MoveS1_150	8	65	rechts	maennlich	82	1	unrel	rechts	List3	links.bmp	1	1	359085	1	387	359472
RespPr_MoveS1_150	8	65	rechts	maennlich	83	1	neuInnen	neutralInnen	List3	links.bmp	1	1	361057	1	399	361456
RespPr_MoveS1_150	8	65	rechts	maennlich	84	3	neuAussen	neutralAussen	List3	rechts.bmp	1	3	363043	3	509	363552
RespPr_MoveS1_150	8	65	rechts	maennlich	85	3	unrel	links	List4	rechts.bmp	1	3	407162	3	549	407711
RespPr_MoveS1_150	8	65	rechts	maennlich	86	1	unrel	rechts	List4	links.bmp	1	1	409295	1	416	409711
RespPr_MoveS1_150	8	65	rechts	maennlich	87	1	rel	links	List4	links.bmp	1	1	411281	1	374	411655
RespPr_MoveS1_150	8	65	rechts	maennlich	88	1	neuAussen	neutralAussen	List4	links.bmp	1	1	413240	1	367	413607
RespPr_MoveS1_150	8	65	rechts	maennlich	89	1	neuAussen	neutralAussen	List4	links.bmp	1	1	415186	1	405	415591
RespPr_MoveS1_150	8	65	rechts	maennlich	90	1	neuAussen	neutralAussen	List4	links.bmp	1	1	417172	1	371	417543
RespPr_MoveS1_150	8	65	rechts	maennlich	91	3	neuInnen	neutralInnen	List4	rechts.bmp	1	3	419132	3	475	419607
RespPr_MoveS1_150	8	65	rechts	maennlich	92	3	unrel	links	List4	rechts.bmp	1	3	421184	3	423	421607
RespPr_MoveS1_150	8	65	rechts	maennlich	93	3	unrel	links	List4	rechts.bmp	1	3	423184	3	455	423639
RespPr_MoveS1_150	8	65	rechts	maennlich	94	3	rel	rechts	List4	rechts.bmp	1	3	425223	3	408	425631
RespPr_MoveS1_150	8	65	rechts	maennlich	95	3	rel	rechts	List4	rechts.bmp	1	3	427209	3	382	427591
RespPr_MoveS1_150	8	65	rechts	maennlich	96	1	unrel	rechts	List4	links.bmp	1	1	429168	1	407	429575
RespPr_MoveS1_150	8	65	rechts	maennlich	97	3	neuAussen	neutralAussen	List4	rechts.bmp	1	3	431154	3	405	431559
RespPr_MoveS1_150	8	65	rechts	maennlich	98	3	neuInnen	neutralInnen	List4	rechts.bmp	1	3	433140	3	475	433615
RespPr_MoveS1_150	8	65	rechts	maennlich	99	1	rel	links	List4	links.bmp	1	1	435193	1	382	435575
RespPr_MoveS1_150	8	65	rechts	maennlich	100	3	unrel	links	List4	rechts.bmp	1	3	437152	3	375	437527
RespPr_MoveS1_150	8	65	rechts	maennlich	101	3	neuAussen	neutralAussen	List4	rechts.bmp	1	3	439112	3	511	439623
RespPr_MoveS1_150	8	65	rechts	maennlich	102	1	rel	links	List4	links.bmp	1	1	441204	1	339	441543
RespPr_MoveS1_150	8	65	rechts	maennlich	103	3	rel	rechts	List4	rechts.bmp	1	3	443124	3	347	443471
RespPr_MoveS1_150	8	65	rechts	maennlich	104	3	rel	rechts	List4	rechts.bmp	1	3	445056	3	583	445639
RespPr_MoveS1_150	8	65	rechts	maennlich	105	3	unrel	links	List4	rechts.bmp	1	3	447216	3	455	447671
RespPr_MoveS1_150	8	65	rechts	maennlich	106	3	neuInnen	neutralInnen	List4	rechts.bmp	1	3	449255	3	408	449663
RespPr_MoveS1_150	8	65	rechts	maennlich	107	3	rel	rechts	List4	rechts.bmp	1	3	451241	3	398	451639
RespPr_MoveS1_150	8	65	rechts	maennlich	108	1	neuInnen	neutralInnen	List4	links.bmp	1	1	453227	1	420	453647
RespPr_MoveS1_150	8	65	rechts	maennlich	109	1	rel	links	List4	links.bmp	1	1	455226	1	309	455535
RespPr_MoveS1_150	8	65	rechts	maennlich	110	3	rel	rechts	List4	rechts.bmp	1	3	457119	3	344	457463
RespPr_MoveS1_150	8	65	rechts	maennlich	111	3	neuAussen	neutralAussen	List4	rechts.bmp	1	3	459052	3	427	459479
RespPr_MoveS1_150	8	65	rechts	maennlich	112	1	rel	links	List4	links.bmp	1	1	461064	1	535	461599
RespPr_MoveS1_150	8	65	rechts	maennlich	113	3	unrel	links	List4	rechts.bmp	1	3	463184	3	447	463631
RespPr_MoveS1_150	8	65	rechts	maennlich	114	1	unrel	rechts	List4	links.bmp	1	1	465210	1	389	465599
RespPr_MoveS1_150	8	65	rechts	maennlich	115	1	neuInnen	neutralInnen	List4	links.bmp	1	1	467182	1	433	467615
RespPr_MoveS1_150	8	65	rechts	maennlich	116	1	unrel	rechts	List4	links.bmp	1	1	469195	1	436	469631
RespPr_MoveS1_150	8	65	rechts	maennlich	117	1	unrel	rechts	List4	links.bmp	1	1	471208	1	423	471631
RespPr_MoveS1_150	8	65	rechts	maennlich	118	1	rel	links	List4	links.bmp	1	1	473194	1	389	473583
RespPr_MoveS1_150	8	65	rechts	maennlich	119	1	unrel	rechts	List4	links.bmp	1	1	475166	1	401	475567
RespPr_MoveS1_150	8	65	rechts	maennlich	120	1	neuInnen	neutralInnen	List4	links.bmp	1	1	477152	1	375	477527
RespPr_MoveS1_150	8	65	rechts	maennlich	121	3	unrel	links	List5	rechts.bmp	1	3	498279	3	464	498743
RespPr_MoveS1_150	8	65	rechts	maennlich	122	3	unrel	links	List5	rechts.bmp	1	3	500331	3	380	500711
RespPr_MoveS1_150	8	65	rechts	maennlich	123	3	neuAussen	neutralAussen	List5	rechts.bmp	1	3	502291	3	364	502655
RespPr_MoveS1_150	8	65	rechts	maennlich	124	1	rel	links	List5	links.bmp	1	1	504237	1	474	504711
RespPr_MoveS1_150	8	65	rechts	maennlich	125	1	unrel	rechts	List5	links.bmp	1	1	506289	1	550	506839
RespPr_MoveS1_150	8	65	rechts	maennlich	126	3	rel	rechts	List5	rechts.bmp	1	3	508409	3	462	508871
RespPr_MoveS1_150	8	65	rechts	maennlich	127	3	rel	rechts	List5	rechts.bmp	1	3	510435	3	388	510823
RespPr_MoveS1_150	8	65	rechts	maennlich	128	1	unrel	rechts	List5	links.bmp	1	1	512407	1	496	512903
RespPr_MoveS1_150	8	65	rechts	maennlich	129	3	neuInnen	neutralInnen	List5	rechts.bmp	1	3	514487	3	384	514871
RespPr_MoveS1_150	8	65	rechts	maennlich	130	3	rel	rechts	List5	rechts.bmp	1	3	516459	3	484	516943
RespPr_MoveS1_150	8	65	rechts	maennlich	131	1	unrel	rechts	List5	links.bmp	0	1	518525	3	402	518927
RespPr_MoveS1_150	8	65	rechts	maennlich	132	1	neuInnen	neutralInnen	List5	links.bmp	1	1	520511	1	464	520975
RespPr_MoveS1_150	8	65	rechts	maennlich	133	3	neuInnen	neutralInnen	List5	rechts.bmp	1	3	522564	3	636	523200
RespPr_MoveS1_150	8	65	rechts	maennlich	134	3	unrel	links	List5	rechts.bmp	1	3	524777	3	534	525311
RespPr_MoveS1_150	8	65	rechts	maennlich	135	3	neuAussen	neutralAussen	List5	rechts.bmp	1	3	526896	3	455	527351
RespPr_MoveS1_150	8	65	rechts	maennlich	136	1	neuInnen	neutralInnen	List5	links.bmp	1	1	528935	1	504	529439
RespPr_MoveS1_150	8	65	rechts	maennlich	137	1	rel	links	List5	links.bmp	1	1	531028	1	419	531447
RespPr_MoveS1_150	8	65	rechts	maennlich	138	1	rel	links	List5	links.bmp	1	1	533027	1	460	533487
RespPr_MoveS1_150	8	65	rechts	maennlich	139	1	neuAussen	neutralAussen	List5	links.bmp	1	1	535067	1	380	535447
RespPr_MoveS1_150	8	65	rechts	maennlich	140	3	rel	rechts	List5	rechts.bmp	1	3	537026	3	461	537487
RespPr_MoveS1_150	8	65	rechts	maennlich	141	1	unrel	rechts	List5	links.bmp	1	1	539065	1	462	539527
RespPr_MoveS1_150	8	65	rechts	maennlich	142	3	unrel	links	List5	rechts.bmp	1	3	541105	3	398	541503
RespPr_MoveS1_150	8	65	rechts	maennlich	143	1	unrel	rechts	List5	links.bmp	1	1	543091	1	388	543479
RespPr_MoveS1_150	8	65	rechts	maennlich	144	3	neuInnen	neutralInnen	List5	rechts.bmp	1	3	545063	3	408	545471
RespPr_MoveS1_150	8	65	rechts	maennlich	145	1	rel	links	List5	links.bmp	1	1	547049	1	414	547463
RespPr_MoveS1_150	8	65	rechts	maennlich	146	1	neuAussen	neutralAussen	List5	links.bmp	1	1	549049	1	518	549567
RespPr_MoveS1_150	8	65	rechts	maennlich	147	1	neuAussen	neutralAussen	List5	links.bmp	1	1	551155	1	565	551720
RespPr_MoveS1_150	8	65	rechts	maennlich	148	3	rel	rechts	List5	rechts.bmp	1	3	553300	3	499	553799
RespPr_MoveS1_150	8	65	rechts	maennlich	149	1	rel	links	List5	links.bmp	1	1	555380	1	531	555911
RespPr_MoveS1_150	8	65	rechts	maennlich	150	3	neuAussen	neutralAussen	List5	rechts.bmp	1	3	557486	3	474	557960
RespPr_MoveS1_150	8	65	rechts	maennlich	151	3	unrel	links	List5	rechts.bmp	1	3	559538	3	493	560031
RespPr_MoveS1_150	8	65	rechts	maennlich	152	3	rel	rechts	List5	rechts.bmp	1	3	561618	3	757	562375
RespPr_MoveS1_150	8	65	rechts	maennlich	153	1	neuInnen	neutralInnen	List5	links.bmp	1	1	563964	1	435	564399
RespPr_MoveS1_150	8	65	rechts	maennlich	154	1	rel	links	List5	links.bmp	1	1	565976	1	431	566407
RespPr_MoveS1_150	8	65	rechts	maennlich	155	1	unrel	rechts	List5	links.bmp	1	1	567989	1	395	568384
RespPr_MoveS1_150	8	65	rechts	maennlich	156	3	unrel	links	List5	rechts.bmp	1	3	569962	3	477	570439
RespPr_MoveS1_150	9	71	rechts	weiblich	1	1	rel	links	List1	links.bmp	1	1	93253	1	864	94117
RespPr_MoveS1_150	9	71	rechts	weiblich	2	1	unrel	rechts	List1	links.bmp	1	1	95705	1	533	96238
RespPr_MoveS1_150	9	71	rechts	weiblich	3	1	unrel	rechts	List1	links.bmp	1	1	97825	1	485	98310
RespPr_MoveS1_150	9	71	rechts	weiblich	4	3	unrel	links	List1	rechts.bmp	1	3	99891	3	603	100494
RespPr_MoveS1_150	9	71	rechts	weiblich	5	3	rel	rechts	List1	rechts.bmp	1	3	102077	3	512	102589
RespPr_MoveS1_150	9	71	rechts	weiblich	6	3	rel	rechts	List1	rechts.bmp	1	3	104169	3	397	104566
RespPr_MoveS1_150	9	71	rechts	weiblich	7	1	neuAussen	neutralAussen	List1	links.bmp	1	1	106155	1	579	106734
RespPr_MoveS1_150	9	71	rechts	weiblich	8	1	neuInnen	neutralInnen	List1	links.bmp	1	1	108314	1	475	108789
RespPr_MoveS1_150	9	71	rechts	weiblich	9	3	neuAussen	neutralAussen	List1	rechts.bmp	1	3	110354	3	500	110854
RespPr_MoveS1_150	9	71	rechts	weiblich	10	3	unrel	links	List1	rechts.bmp	1	3	112420	3	474	112894
RespPr_MoveS1_150	9	71	rechts	weiblich	11	1	rel	links	List1	links.bmp	1	1	114472	1	606	115078
RespPr_MoveS1_150	9	71	rechts	weiblich	12	3	neuInnen	neutralInnen	List1	rechts.bmp	1	3	116658	3	564	117222
RespPr_MoveS1_150	9	71	rechts	weiblich	13	3	rel	rechts	List2	rechts.bmp	1	3	137478	3	624	138102
RespPr_MoveS1_150	9	71	rechts	weiblich	14	1	neuInnen	neutralInnen	List2	links.bmp	1	1	139691	1	547	140238
RespPr_MoveS1_150	9	71	rechts	weiblich	15	1	rel	links	List2	links.bmp	1	1	141823	1	543	142366
RespPr_MoveS1_150	9	71	rechts	weiblich	16	3	unrel	links	List2	rechts.bmp	1	3	143943	3	414	144357
RespPr_MoveS1_150	9	71	rechts	weiblich	17	1	unrel	rechts	List2	links.bmp	1	1	145929	1	436	146365
RespPr_MoveS1_150	9	71	rechts	weiblich	18	3	neuAussen	neutralAussen	List2	rechts.bmp	1	3	147955	3	475	148430
RespPr_MoveS1_150	9	71	rechts	weiblich	19	1	unrel	rechts	List2	links.bmp	1	1	150007	1	463	150470
RespPr_MoveS1_150	9	71	rechts	weiblich	20	3	unrel	links	List2	rechts.bmp	1	3	152047	3	486	152533
RespPr_MoveS1_150	9	71	rechts	weiblich	21	1	rel	links	List2	links.bmp	1	1	154113	1	485	154598
RespPr_MoveS1_150	9	71	rechts	weiblich	22	3	neuInnen	neutralInnen	List2	rechts.bmp	1	3	156179	3	451	156630
RespPr_MoveS1_150	9	71	rechts	weiblich	23	3	rel	rechts	List2	rechts.bmp	1	3	158218	3	540	158758
RespPr_MoveS1_150	9	71	rechts	weiblich	24	1	unrel	rechts	List2	links.bmp	1	1	160337	1	509	160846
RespPr_MoveS1_150	9	71	rechts	weiblich	25	1	neuAussen	neutralAussen	List2	links.bmp	1	1	162430	1	559	162989
RespPr_MoveS1_150	9	71	rechts	weiblich	26	3	rel	rechts	List2	rechts.bmp	1	3	164576	3	510	165086
RespPr_MoveS1_150	9	71	rechts	weiblich	27	1	neuInnen	neutralInnen	List2	links.bmp	1	1	166668	1	457	167125
RespPr_MoveS1_150	9	71	rechts	weiblich	28	1	neuAussen	neutralAussen	List2	links.bmp	1	1	168708	1	618	169326
RespPr_MoveS1_150	9	71	rechts	weiblich	29	1	neuAussen	neutralAussen	List2	links.bmp	1	1	170894	1	568	171462
RespPr_MoveS1_150	9	71	rechts	weiblich	30	3	unrel	links	List2	rechts.bmp	1	3	173040	3	462	173502
RespPr_MoveS1_150	9	71	rechts	weiblich	31	1	rel	links	List2	links.bmp	1	1	175066	1	524	175590
RespPr_MoveS1_150	9	71	rechts	weiblich	32	3	neuInnen	neutralInnen	List2	rechts.bmp	1	3	177172	3	490	177662
RespPr_MoveS1_150	9	71	rechts	weiblich	33	3	neuAussen	neutralAussen	List2	rechts.bmp	1	3	179238	3	568	179806
RespPr_MoveS1_150	9	71	rechts	weiblich	34	3	unrel	links	List2	rechts.bmp	1	3	181384	3	549	181933
RespPr_MoveS1_150	9	71	rechts	weiblich	35	3	rel	rechts	List2	rechts.bmp	1	3	183516	3	481	183997
RespPr_MoveS1_150	9	71	rechts	weiblich	36	3	neuAussen	neutralAussen	List2	rechts.bmp	1	3	185582	3	448	186030
RespPr_MoveS1_150	9	71	rechts	weiblich	37	3	neuInnen	neutralInnen	List2	rechts.bmp	1	3	187608	3	589	188197
RespPr_MoveS1_150	9	71	rechts	weiblich	38	1	rel	links	List2	links.bmp	1	1	189781	1	505	190286
RespPr_MoveS1_150	9	71	rechts	weiblich	39	1	unrel	rechts	List2	links.bmp	1	1	191873	1	508	192381
RespPr_MoveS1_150	9	71	rechts	weiblich	40	3	unrel	links	List2	rechts.bmp	1	3	193966	3	464	194430
RespPr_MoveS1_150	9	71	rechts	weiblich	41	1	rel	links	List2	links.bmp	1	1	196019	1	547	196566
RespPr_MoveS1_150	9	71	rechts	weiblich	42	1	unrel	rechts	List2	links.bmp	1	1	198151	1	655	198806
RespPr_MoveS1_150	9	71	rechts	weiblich	43	3	unrel	links	List2	rechts.bmp	1	3	200391	3	495	200886
RespPr_MoveS1_150	9	71	rechts	weiblich	44	1	neuInnen	neutralInnen	List2	links.bmp	1	1	202457	1	517	202974
RespPr_MoveS1_150	9	71	rechts	weiblich	45	1	rel	links	List2	links.bmp	1	1	204563	1	603	205166
RespPr_MoveS1_150	9	71	rechts	weiblich	46	1	unrel	rechts	List2	links.bmp	1	1	206749	1	537	207286
RespPr_MoveS1_150	9	71	rechts	weiblich	47	3	rel	rechts	List2	rechts.bmp	1	3	208868	3	434	209302
RespPr_MoveS1_150	9	71	rechts	weiblich	48	3	rel	rechts	List2	rechts.bmp	1	3	210881	3	477	211358
RespPr_MoveS1_150	9	71	rechts	weiblich	49	3	rel	rechts	List3	rechts.bmp	1	3	217198	3	472	217670
RespPr_MoveS1_150	9	71	rechts	weiblich	50	1	unrel	rechts	List3	links.bmp	1	1	219238	1	544	219782
RespPr_MoveS1_150	9	71	rechts	weiblich	51	1	rel	links	List3	links.bmp	1	1	221370	1	468	221838
RespPr_MoveS1_150	9	71	rechts	weiblich	52	3	unrel	links	List3	rechts.bmp	1	3	223410	3	596	224006
RespPr_MoveS1_150	9	71	rechts	weiblich	53	3	neuAussen	neutralAussen	List3	rechts.bmp	1	3	225582	3	544	226126
RespPr_MoveS1_150	9	71	rechts	weiblich	54	3	unrel	links	List3	rechts.bmp	1	3	227702	3	512	228214
RespPr_MoveS1_150	9	71	rechts	weiblich	55	3	unrel	links	List3	rechts.bmp	1	3	229794	3	532	230326
RespPr_MoveS1_150	9	71	rechts	weiblich	56	1	rel	links	List3	links.bmp	1	1	231914	1	532	232446
RespPr_MoveS1_150	9	71	rechts	weiblich	57	1	neuAussen	neutralAussen	List3	links.bmp	1	1	234033	1	525	234558
RespPr_MoveS1_150	9	71	rechts	weiblich	58	1	rel	links	List3	links.bmp	1	1	236139	1	515	236654
RespPr_MoveS1_150	9	71	rechts	weiblich	59	1	rel	links	List3	links.bmp	1	1	238231	1	550	238781
RespPr_MoveS1_150	9	71	rechts	weiblich	60	3	rel	rechts	List3	rechts.bmp	1	3	240351	3	511	240862
RespPr_MoveS1_150	9	71	rechts	weiblich	61	3	neuAussen	neutralAussen	List3	rechts.bmp	1	3	242443	3	507	242950
RespPr_MoveS1_150	9	71	rechts	weiblich	62	1	neuAussen	neutralAussen	List3	links.bmp	1	1	244523	1	498	245021
RespPr_MoveS1_150	9	71	rechts	weiblich	63	1	neuAussen	neutralAussen	List3	links.bmp	1	1	246589	1	617	247206
RespPr_MoveS1_150	9	71	rechts	weiblich	64	3	neuInnen	neutralInnen	List3	rechts.bmp	1	3	248775	3	503	249278
RespPr_MoveS1_150	9	71	rechts	weiblich	65	1	unrel	rechts	List3	links.bmp	1	1	250867	1	467	251334
RespPr_MoveS1_150	9	71	rechts	weiblich	66	3	unrel	links	List3	rechts.bmp	1	3	252920	3	485	253405
RespPr_MoveS1_150	9	71	rechts	weiblich	67	1	unrel	rechts	List3	links.bmp	1	1	254986	1	548	255534
RespPr_MoveS1_150	9	71	rechts	weiblich	68	3	neuAussen	neutralAussen	List3	rechts.bmp	1	3	257119	3	550	257669
RespPr_MoveS1_150	9	71	rechts	weiblich	69	3	neuInnen	neutralInnen	List3	rechts.bmp	1	3	259251	3	539	259790
RespPr_MoveS1_150	9	71	rechts	weiblich	70	1	neuInnen	neutralInnen	List3	links.bmp	1	1	261371	1	547	261918
RespPr_MoveS1_150	9	71	rechts	weiblich	71	3	unrel	links	List3	rechts.bmp	1	3	263503	3	559	264062
RespPr_MoveS1_150	9	71	rechts	weiblich	72	1	rel	links	List3	links.bmp	1	1	265636	1	474	266110
RespPr_MoveS1_150	9	71	rechts	weiblich	73	3	rel	rechts	List3	rechts.bmp	1	3	267688	3	454	268142
RespPr_MoveS1_150	9	71	rechts	weiblich	74	1	unrel	rechts	List3	links.bmp	1	1	269728	1	502	270230
RespPr_MoveS1_150	9	71	rechts	weiblich	75	1	rel	links	List3	links.bmp	1	1	271794	1	612	272406
RespPr_MoveS1_150	9	71	rechts	weiblich	76	3	rel	rechts	List3	rechts.bmp	1	3	273980	3	522	274502
RespPr_MoveS1_150	9	71	rechts	weiblich	77	3	neuInnen	neutralInnen	List3	rechts.bmp	1	3	276086	3	495	276581
RespPr_MoveS1_150	9	71	rechts	weiblich	78	1	neuInnen	neutralInnen	List3	links.bmp	1	1	278165	1	577	278742
RespPr_MoveS1_150	9	71	rechts	weiblich	79	3	unrel	links	List3	rechts.bmp	1	3	280324	3	514	280838
RespPr_MoveS1_150	9	71	rechts	weiblich	80	3	rel	rechts	List3	rechts.bmp	1	3	282417	3	549	282966
RespPr_MoveS1_150	9	71	rechts	weiblich	81	1	unrel	rechts	List3	links.bmp	1	1	284550	1	448	284998
RespPr_MoveS1_150	9	71	rechts	weiblich	82	1	neuInnen	neutralInnen	List3	links.bmp	1	1	286576	1	414	286990
RespPr_MoveS1_150	9	71	rechts	weiblich	83	1	unrel	rechts	List3	links.bmp	1	1	288575	1	583	289158
RespPr_MoveS1_150	9	71	rechts	weiblich	84	3	rel	rechts	List3	rechts.bmp	1	3	290734	3	464	291198
RespPr_MoveS1_150	9	71	rechts	weiblich	85	1	unrel	rechts	List4	links.bmp	1	1	296026	1	652	296678
RespPr_MoveS1_150	9	71	rechts	weiblich	86	1	rel	links	List4	links.bmp	1	1	298265	1	493	298758
RespPr_MoveS1_150	9	71	rechts	weiblich	87	3	unrel	links	List4	rechts.bmp	1	3	300344	3	494	300838
RespPr_MoveS1_150	9	71	rechts	weiblich	88	3	neuInnen	neutralInnen	List4	rechts.bmp	1	3	302424	3	502	302926
RespPr_MoveS1_150	9	71	rechts	weiblich	89	3	neuAussen	neutralAussen	List4	rechts.bmp	1	3	304503	3	511	305014
RespPr_MoveS1_150	9	71	rechts	weiblich	90	1	rel	links	List4	links.bmp	1	1	306596	1	489	307085
RespPr_MoveS1_150	9	71	rechts	weiblich	91	3	rel	rechts	List4	rechts.bmp	1	3	308662	3	536	309198
RespPr_MoveS1_150	9	71	rechts	weiblich	92	3	neuInnen	neutralInnen	List4	rechts.bmp	1	3	310781	3	569	311350
RespPr_MoveS1_150	9	71	rechts	weiblich	93	3	neuAussen	neutralAussen	List4	rechts.bmp	1	3	312927	3	535	313462
RespPr_MoveS1_150	9	71	rechts	weiblich	94	3	neuInnen	neutralInnen	List4	rechts.bmp	1	3	315033	3	461	315494
RespPr_MoveS1_150	9	71	rechts	weiblich	95	1	neuAussen	neutralAussen	List4	links.bmp	1	1	317059	1	627	317686
RespPr_MoveS1_150	9	71	rechts	weiblich	96	1	neuInnen	neutralInnen	List4	links.bmp	1	1	319271	1	511	319782
RespPr_MoveS1_150	9	71	rechts	weiblich	97	3	unrel	links	List4	rechts.bmp	1	3	321351	3	566	321917
RespPr_MoveS1_150	9	71	rechts	weiblich	98	1	rel	links	List4	links.bmp	1	1	323497	1	533	324030
RespPr_MoveS1_150	9	71	rechts	weiblich	99	3	rel	rechts	List4	rechts.bmp	1	3	325616	3	470	326086
RespPr_MoveS1_150	9	71	rechts	weiblich	100	1	neuInnen	neutralInnen	List4	links.bmp	1	1	327669	1	505	328174
RespPr_MoveS1_150	9	71	rechts	weiblich	101	1	unrel	rechts	List4	links.bmp	1	1	329761	1	477	330238
RespPr_MoveS1_150	9	71	rechts	weiblich	102	1	unrel	rechts	List4	links.bmp	1	1	331814	1	520	332334
RespPr_MoveS1_150	9	71	rechts	weiblich	103	3	neuAussen	neutralAussen	List4	rechts.bmp	1	3	333920	3	534	334454
RespPr_MoveS1_150	9	71	rechts	weiblich	104	1	rel	links	List4	links.bmp	1	1	336039	1	471	336510
RespPr_MoveS1_150	9	71	rechts	weiblich	105	3	unrel	links	List4	rechts.bmp	1	3	338092	3	530	338622
RespPr_MoveS1_150	9	71	rechts	weiblich	106	1	neuAussen	neutralAussen	List4	links.bmp	1	1	340198	1	648	340846
RespPr_MoveS1_150	9	71	rechts	weiblich	107	3	unrel	links	List4	rechts.bmp	1	3	342424	3	502	342926
RespPr_MoveS1_150	9	71	rechts	weiblich	108	3	rel	rechts	List4	rechts.bmp	1	3	344490	3	548	345038
RespPr_MoveS1_150	9	71	rechts	weiblich	109	3	rel	rechts	List4	rechts.bmp	1	3	346622	3	528	347150
RespPr_MoveS1_150	9	71	rechts	weiblich	110	1	unrel	rechts	List4	links.bmp	1	1	348728	1	502	349230
RespPr_MoveS1_150	9	71	rechts	weiblich	111	1	neuInnen	neutralInnen	List4	links.bmp	1	1	350808	1	518	351326
RespPr_MoveS1_150	9	71	rechts	weiblich	112	3	unrel	links	List4	rechts.bmp	1	3	352914	3	468	353382
RespPr_MoveS1_150	9	71	rechts	weiblich	113	1	unrel	rechts	List4	links.bmp	1	1	354966	1	536	355502
RespPr_MoveS1_150	9	71	rechts	weiblich	114	3	unrel	links	List4	rechts.bmp	1	3	357086	3	520	357606
RespPr_MoveS1_150	9	71	rechts	weiblich	115	1	rel	links	List4	links.bmp	1	1	359191	1	503	359694
RespPr_MoveS1_150	9	71	rechts	weiblich	116	3	rel	rechts	List4	rechts.bmp	1	3	361271	3	479	361750
RespPr_MoveS1_150	9	71	rechts	weiblich	117	1	rel	links	List4	links.bmp	1	1	363337	1	525	363862
RespPr_MoveS1_150	9	71	rechts	weiblich	118	1	unrel	rechts	List4	links.bmp	1	1	365443	1	563	366006
RespPr_MoveS1_150	9	71	rechts	weiblich	119	1	neuAussen	neutralAussen	List4	links.bmp	1	1	367589	1	577	368166
RespPr_MoveS1_150	9	71	rechts	weiblich	120	3	rel	rechts	List4	rechts.bmp	1	3	369735	3	535	370270
RespPr_MoveS1_150	9	71	rechts	weiblich	121	3	unrel	links	List5	rechts.bmp	1	3	376386	3	516	376902
RespPr_MoveS1_150	9	71	rechts	weiblich	122	1	neuInnen	neutralInnen	List5	links.bmp	1	1	378478	1	463	378941
RespPr_MoveS1_150	9	71	rechts	weiblich	123	3	neuAussen	neutralAussen	List5	rechts.bmp	1	3	380518	3	472	380990
RespPr_MoveS1_150	9	71	rechts	weiblich	124	1	neuAussen	neutralAussen	List5	links.bmp	1	1	382570	1	540	383110
RespPr_MoveS1_150	9	71	rechts	weiblich	125	1	neuInnen	neutralInnen	List5	links.bmp	1	1	384690	1	476	385166
RespPr_MoveS1_150	9	71	rechts	weiblich	126	3	unrel	links	List5	rechts.bmp	1	3	386742	3	496	387238
RespPr_MoveS1_150	9	71	rechts	weiblich	127	1	rel	links	List5	links.bmp	1	1	388822	1	480	389302
RespPr_MoveS1_150	9	71	rechts	weiblich	128	3	rel	rechts	List5	rechts.bmp	1	3	390888	3	534	391422
RespPr_MoveS1_150	9	71	rechts	weiblich	129	1	rel	links	List5	links.bmp	1	1	392994	1	571	393565
RespPr_MoveS1_150	9	71	rechts	weiblich	130	1	unrel	rechts	List5	links.bmp	1	1	395153	1	549	395702
RespPr_MoveS1_150	9	71	rechts	weiblich	131	3	rel	rechts	List5	rechts.bmp	1	3	397286	3	520	397806
RespPr_MoveS1_150	9	71	rechts	weiblich	132	3	neuInnen	neutralInnen	List5	rechts.bmp	1	3	399392	3	502	399894
RespPr_MoveS1_150	9	71	rechts	weiblich	133	3	neuInnen	neutralInnen	List5	rechts.bmp	1	3	401471	3	471	401942
RespPr_MoveS1_150	9	71	rechts	weiblich	134	3	neuAussen	neutralAussen	List5	rechts.bmp	1	3	403523	3	523	404046
RespPr_MoveS1_150	9	71	rechts	weiblich	135	3	unrel	links	List5	rechts.bmp	1	3	405629	3	561	406190
RespPr_MoveS1_150	9	71	rechts	weiblich	136	3	unrel	links	List5	rechts.bmp	1	3	407775	3	526	408301
RespPr_MoveS1_150	9	71	rechts	weiblich	137	3	rel	rechts	List5	rechts.bmp	1	3	409881	3	493	410374
RespPr_MoveS1_150	9	71	rechts	weiblich	138	3	rel	rechts	List5	rechts.bmp	1	3	411961	3	469	412430
RespPr_MoveS1_150	9	71	rechts	weiblich	139	3	rel	rechts	List5	rechts.bmp	1	3	414013	3	497	414510
RespPr_MoveS1_150	9	71	rechts	weiblich	140	1	unrel	rechts	List5	links.bmp	1	1	416093	1	600	416693
RespPr_MoveS1_150	9	71	rechts	weiblich	141	3	rel	rechts	List5	rechts.bmp	1	3	418279	3	487	418766
RespPr_MoveS1_150	9	71	rechts	weiblich	142	1	neuInnen	neutralInnen	List5	links.bmp	1	1	420345	1	557	420902
RespPr_MoveS1_150	9	71	rechts	weiblich	143	1	rel	links	List5	links.bmp	1	1	422491	1	579	423070
RespPr_MoveS1_150	9	71	rechts	weiblich	144	3	neuInnen	neutralInnen	List5	rechts.bmp	1	3	424650	3	556	425206
RespPr_MoveS1_150	9	71	rechts	weiblich	145	1	rel	links	List5	links.bmp	1	1	426782	1	535	427317
RespPr_MoveS1_150	9	71	rechts	weiblich	146	1	neuAussen	neutralAussen	List5	links.bmp	1	1	428902	1	608	429510
RespPr_MoveS1_150	9	71	rechts	weiblich	147	1	rel	links	List5	links.bmp	1	1	431088	1	542	431630
RespPr_MoveS1_150	9	71	rechts	weiblich	148	1	unrel	rechts	List5	links.bmp	1	1	433194	1	612	433806
RespPr_MoveS1_150	9	71	rechts	weiblich	149	1	rel	links	List5	links.bmp	1	1	435393	1	605	435998
RespPr_MoveS1_150	9	71	rechts	weiblich	150	1	neuAussen	neutralAussen	List5	links.bmp	1	1	437579	1	555	438134
RespPr_MoveS1_150	9	71	rechts	weiblich	151	3	unrel	links	List5	rechts.bmp	1	3	439712	3	550	440262
RespPr_MoveS1_150	9	71	rechts	weiblich	152	1	unrel	rechts	List5	links.bmp	1	1	441844	1	578	442422
RespPr_MoveS1_150	9	71	rechts	weiblich	153	3	unrel	links	List5	rechts.bmp	1	3	444003	3	547	444550
RespPr_MoveS1_150	9	71	rechts	weiblich	154	1	unrel	rechts	List5	links.bmp	1	1	446123	1	619	446742
RespPr_MoveS1_150	9	71	rechts	weiblich	155	1	unrel	rechts	List5	links.bmp	1	1	448309	1	584	448893
RespPr_MoveS1_150	9	71	rechts	weiblich	156	3	neuAussen	neutralAussen	List5	rechts.bmp	1	3	450481	3	548	451029
RespPr_MoveS2_360	21	66	rechts	weiblich	1	1	rel	links	List1	links.bmp	1	1	88857	1	944	89801
RespPr_MoveS2_360	21	66	rechts	weiblich	2	3	rel	rechts	List1	rechts.bmp	1	3	91603	3	550	92153
RespPr_MoveS2_360	21	66	rechts	weiblich	3	3	unrel	links	List1	rechts.bmp	1	3	93949	3	612	94561
RespPr_MoveS2_360	21	66	rechts	weiblich	4	3	neuInnen	neutralInnen	List1	rechts.bmp	1	3	96361	3	503	96864
RespPr_MoveS2_360	21	66	rechts	weiblich	5	1	neuInnen	neutralInnen	List1	links.bmp	1	1	98654	1	667	99321
RespPr_MoveS2_360	21	66	rechts	weiblich	6	3	neuAussen	neutralAussen	List1	rechts.bmp	1	3	101120	3	513	101633
RespPr_MoveS2_360	21	66	rechts	weiblich	7	1	rel	links	List1	links.bmp	1	1	103425	1	488	103913
RespPr_MoveS2_360	21	66	rechts	weiblich	8	1	unrel	rechts	List1	links.bmp	1	1	105705	1	632	106337
RespPr_MoveS2_360	21	66	rechts	weiblich	9	3	unrel	links	List1	rechts.bmp	1	3	108131	3	629	108760
RespPr_MoveS2_360	21	66	rechts	weiblich	10	1	neuAussen	neutralAussen	List1	links.bmp	1	1	110556	1	469	111025
RespPr_MoveS2_360	21	66	rechts	weiblich	11	3	rel	rechts	List1	rechts.bmp	1	3	112809	3	568	113377
RespPr_MoveS2_360	21	66	rechts	weiblich	12	1	unrel	rechts	List1	links.bmp	1	1	115155	1	430	115585
RespPr_MoveS2_360	21	66	rechts	weiblich	13	1	neuAussen	neutralAussen	List2	links.bmp	1	1	132642	1	503	133145
RespPr_MoveS2_360	21	66	rechts	weiblich	14	1	neuInnen	neutralInnen	List2	links.bmp	1	1	134935	1	458	135393
RespPr_MoveS2_360	21	66	rechts	weiblich	15	3	rel	rechts	List2	rechts.bmp	1	3	137188	3	429	137617
RespPr_MoveS2_360	21	66	rechts	weiblich	16	1	neuAussen	neutralAussen	List2	links.bmp	1	1	139414	1	395	139809
RespPr_MoveS2_360	21	66	rechts	weiblich	17	3	unrel	links	List2	rechts.bmp	1	3	141600	3	457	142057
RespPr_MoveS2_360	21	66	rechts	weiblich	18	3	unrel	links	List2	rechts.bmp	1	3	143852	3	589	144441
RespPr_MoveS2_360	21	66	rechts	weiblich	19	3	rel	rechts	List2	rechts.bmp	1	3	146238	3	499	146737
RespPr_MoveS2_360	21	66	rechts	weiblich	20	3	unrel	links	List2	rechts.bmp	1	3	148531	3	518	149049
RespPr_MoveS2_360	21	66	rechts	weiblich	21	3	unrel	links	List2	rechts.bmp	1	3	150850	3	439	151289
RespPr_MoveS2_360	21	66	rechts	weiblich	22	3	neuAussen	neutralAussen	List2	rechts.bmp	1	3	153089	3	456	153545
RespPr_MoveS2_360	21	66	rechts	weiblich	23	1	rel	links	List2	links.bmp	1	1	155342	1	371	155713
RespPr_MoveS2_360	21	66	rechts	weiblich	24	1	unrel	rechts	List2	links.bmp	1	1	157501	1	452	157953
RespPr_MoveS2_360	21	66	rechts	weiblich	25	1	unrel	rechts	List2	links.bmp	1	1	159754	1	463	160217
RespPr_MoveS2_360	21	66	rechts	weiblich	26	3	rel	rechts	List2	rechts.bmp	1	3	162019	3	398	162417
RespPr_MoveS2_360	21	66	rechts	weiblich	27	3	rel	rechts	List2	rechts.bmp	1	3	164219	3	429	164648
RespPr_MoveS2_360	21	66	rechts	weiblich	28	1	neuInnen	neutralInnen	List2	links.bmp	1	1	166445	1	372	166817
RespPr_MoveS2_360	21	66	rechts	weiblich	29	3	neuInnen	neutralInnen	List2	rechts.bmp	1	3	168617	3	376	168993
RespPr_MoveS2_360	21	66	rechts	weiblich	30	3	neuAussen	neutralAussen	List2	rechts.bmp	1	3	170790	3	419	171209
RespPr_MoveS2_360	21	66	rechts	weiblich	31	1	rel	links	List2	links.bmp	1	1	173002	1	463	173465
RespPr_MoveS2_360	21	66	rechts	weiblich	32	3	neuInnen	neutralInnen	List2	rechts.bmp	1	3	175255	3	466	175721
RespPr_MoveS2_360	21	66	rechts	weiblich	33	3	unrel	links	List2	rechts.bmp	1	3	177521	3	400	177921
RespPr_MoveS2_360	21	66	rechts	weiblich	34	3	neuAussen	neutralAussen	List2	rechts.bmp	1	3	179720	3	432	180152
RespPr_MoveS2_360	21	66	rechts	weiblich	35	3	neuInnen	neutralInnen	List2	rechts.bmp	1	3	181946	3	438	182384
RespPr_MoveS2_360	21	66	rechts	weiblich	36	1	rel	links	List2	links.bmp	1	1	184185	1	424	184609
RespPr_MoveS2_360	21	66	rechts	weiblich	37	1	rel	links	List2	links.bmp	1	1	186398	1	474	186872
RespPr_MoveS2_360	21	66	rechts	weiblich	38	3	unrel	links	List2	rechts.bmp	1	3	188664	3	377	189041
RespPr_MoveS2_360	21	66	rechts	weiblich	39	1	unrel	rechts	List2	links.bmp	1	1	190837	1	435	191272
RespPr_MoveS2_360	21	66	rechts	weiblich	40	1	unrel	rechts	List2	links.bmp	1	1	193062	1	395	193457
RespPr_MoveS2_360	21	66	rechts	weiblich	41	1	neuInnen	neutralInnen	List2	links.bmp	1	1	195248	1	424	195672
RespPr_MoveS2_360	21	66	rechts	weiblich	42	1	unrel	rechts	List2	links.bmp	1	1	197461	1	388	197849
RespPr_MoveS2_360	21	66	rechts	weiblich	43	1	unrel	rechts	List2	links.bmp	1	1	199647	1	441	200088
RespPr_MoveS2_360	21	66	rechts	weiblich	44	3	rel	rechts	List2	rechts.bmp	1	3	201886	3	530	202416
RespPr_MoveS2_360	21	66	rechts	weiblich	45	1	rel	links	List2	links.bmp	1	1	204205	1	403	204608
RespPr_MoveS2_360	21	66	rechts	weiblich	46	1	neuAussen	neutralAussen	List2	links.bmp	1	1	206405	1	452	206857
RespPr_MoveS2_360	21	66	rechts	weiblich	47	1	rel	links	List2	links.bmp	1	1	208644	1	413	209057
RespPr_MoveS2_360	21	66	rechts	weiblich	48	3	rel	rechts	List2	rechts.bmp	1	3	210857	3	407	211264
RespPr_MoveS2_360	21	66	rechts	weiblich	49	3	unrel	links	List3	rechts.bmp	1	3	219627	3	550	220177
RespPr_MoveS2_360	21	66	rechts	weiblich	50	1	unrel	rechts	List3	links.bmp	1	1	221973	1	411	222384
RespPr_MoveS2_360	21	66	rechts	weiblich	51	3	rel	rechts	List3	rechts.bmp	1	3	224186	3	406	224592
RespPr_MoveS2_360	21	66	rechts	weiblich	52	3	rel	rechts	List3	rechts.bmp	1	3	226385	3	383	226768
RespPr_MoveS2_360	21	66	rechts	weiblich	53	3	rel	rechts	List3	rechts.bmp	1	3	228571	3	398	228969
RespPr_MoveS2_360	21	66	rechts	weiblich	54	1	rel	links	List3	links.bmp	1	1	230770	1	430	231200
RespPr_MoveS2_360	21	66	rechts	weiblich	55	3	neuAussen	neutralAussen	List3	rechts.bmp	1	3	232996	3	348	233344
RespPr_MoveS2_360	21	66	rechts	weiblich	56	1	neuAussen	neutralAussen	List3	links.bmp	1	1	235142	1	322	235464
RespPr_MoveS2_360	21	66	rechts	weiblich	57	1	unrel	rechts	List3	links.bmp	1	1	237261	1	444	237705
RespPr_MoveS2_360	21	66	rechts	weiblich	58	3	unrel	links	List3	rechts.bmp	1	3	239500	3	396	239896
RespPr_MoveS2_360	21	66	rechts	weiblich	59	3	neuInnen	neutralInnen	List3	rechts.bmp	1	3	241686	3	515	242201
RespPr_MoveS2_360	21	66	rechts	weiblich	60	3	rel	rechts	List3	rechts.bmp	1	3	243979	3	534	244513
RespPr_MoveS2_360	21	66	rechts	weiblich	61	3	unrel	links	List3	rechts.bmp	1	3	246312	3	385	246697
RespPr_MoveS2_360	21	66	rechts	weiblich	62	1	neuAussen	neutralAussen	List3	links.bmp	1	1	248497	1	432	248929
RespPr_MoveS2_360	21	66	rechts	weiblich	63	1	neuInnen	neutralInnen	List3	links.bmp	1	1	250723	1	437	251160
RespPr_MoveS2_360	21	66	rechts	weiblich	64	1	rel	links	List3	links.bmp	1	1	252963	1	445	253408
RespPr_MoveS2_360	21	66	rechts	weiblich	65	1	unrel	rechts	List3	links.bmp	1	1	255202	1	415	255617
RespPr_MoveS2_360	21	66	rechts	weiblich	66	1	unrel	rechts	List3	links.bmp	1	1	257415	1	394	257809
RespPr_MoveS2_360	21	66	rechts	weiblich	67	1	neuInnen	neutralInnen	List3	links.bmp	1	1	259600	1	456	260056
RespPr_MoveS2_360	21	66	rechts	weiblich	68	3	unrel	links	List3	rechts.bmp	1	3	261853	3	427	262280
RespPr_MoveS2_360	21	66	rechts	weiblich	69	3	neuInnen	neutralInnen	List3	rechts.bmp	1	3	264079	3	409	264488
RespPr_MoveS2_360	21	66	rechts	weiblich	70	3	neuAussen	neutralAussen	List3	rechts.bmp	1	3	266265	3	384	266649
RespPr_MoveS2_360	21	66	rechts	weiblich	71	1	neuAussen	neutralAussen	List3	links.bmp	1	1	268451	1	366	268817
RespPr_MoveS2_360	21	66	rechts	weiblich	72	1	rel	links	List3	links.bmp	1	1	270610	1	383	270993
RespPr_MoveS2_360	21	66	rechts	weiblich	73	1	neuInnen	neutralInnen	List3	links.bmp	1	1	272783	1	490	273273
RespPr_MoveS2_360	21	66	rechts	weiblich	74	1	unrel	rechts	List3	links.bmp	1	1	275062	1	426	275488
RespPr_MoveS2_360	21	66	rechts	weiblich	75	3	unrel	links	List3	rechts.bmp	1	3	277288	3	409	277697
RespPr_MoveS2_360	21	66	rechts	weiblich	76	1	rel	links	List3	links.bmp	1	1	279487	1	378	279865
RespPr_MoveS2_360	21	66	rechts	weiblich	77	3	neuInnen	neutralInnen	List3	rechts.bmp	1	3	281660	3	445	282105
RespPr_MoveS2_360	21	66	rechts	weiblich	78	1	rel	links	List3	links.bmp	1	1	283899	1	358	284257
RespPr_MoveS2_360	21	66	rechts	weiblich	79	3	neuAussen	neutralAussen	List3	rechts.bmp	1	3	286058	3	455	286513
RespPr_MoveS2_360	21	66	rechts	weiblich	80	3	unrel	links	List3	rechts.bmp	1	3	288311	3	490	288801
RespPr_MoveS2_360	21	66	rechts	weiblich	81	3	rel	rechts	List3	rechts.bmp	1	3	290604	3	429	291033
RespPr_MoveS2_360	21	66	rechts	weiblich	82	3	rel	rechts	List3	rechts.bmp	1	3	292830	3	499	293329
RespPr_MoveS2_360	21	66	rechts	weiblich	83	1	unrel	rechts	List3	links.bmp	1	1	295122	1	487	295609
RespPr_MoveS2_360	21	66	rechts	weiblich	84	1	rel	links	List3	links.bmp	1	1	297388	1	517	297905
RespPr_MoveS2_360	21	66	rechts	weiblich	85	1	neuInnen	neutralInnen	List4	links.bmp	1	1	304826	1	455	305281
RespPr_MoveS2_360	21	66	rechts	weiblich	86	1	rel	links	List4	links.bmp	1	1	307078	1	467	307545
RespPr_MoveS2_360	21	66	rechts	weiblich	87	3	unrel	links	List4	rechts.bmp	1	3	309344	3	433	309777
RespPr_MoveS2_360	21	66	rechts	weiblich	88	3	unrel	links	List4	rechts.bmp	1	3	311570	3	415	311985
RespPr_MoveS2_360	21	66	rechts	weiblich	89	3	neuInnen	neutralInnen	List4	rechts.bmp	1	3	313783	3	402	314185
RespPr_MoveS2_360	21	66	rechts	weiblich	90	3	rel	rechts	List4	rechts.bmp	1	3	315982	3	419	316401
RespPr_MoveS2_360	21	66	rechts	weiblich	91	1	neuAussen	neutralAussen	List4	links.bmp	1	1	318194	1	398	318592
RespPr_MoveS2_360	21	66	rechts	weiblich	92	3	rel	rechts	List4	rechts.bmp	1	3	320394	3	439	320833
RespPr_MoveS2_360	21	66	rechts	weiblich	93	3	rel	rechts	List4	rechts.bmp	1	3	322633	3	472	323105
RespPr_MoveS2_360	21	66	rechts	weiblich	94	1	rel	links	List4	links.bmp	1	1	324899	1	390	325289
RespPr_MoveS2_360	21	66	rechts	weiblich	95	3	rel	rechts	List4	rechts.bmp	1	3	327085	3	364	327449
RespPr_MoveS2_360	21	66	rechts	weiblich	96	3	neuAussen	neutralAussen	List4	rechts.bmp	1	3	329244	3	429	329673
RespPr_MoveS2_360	21	66	rechts	weiblich	97	1	rel	links	List4	links.bmp	1	1	331470	1	411	331881
RespPr_MoveS2_360	21	66	rechts	weiblich	98	3	neuAussen	neutralAussen	List4	rechts.bmp	1	3	333683	3	326	334009
RespPr_MoveS2_360	21	66	rechts	weiblich	99	1	unrel	rechts	List4	links.bmp	1	1	335802	1	351	336153
RespPr_MoveS2_360	21	66	rechts	weiblich	100	3	neuAussen	neutralAussen	List4	rechts.bmp	1	3	337948	3	381	338329
RespPr_MoveS2_360	21	66	rechts	weiblich	101	1	rel	links	List4	links.bmp	1	1	340121	1	520	340641
RespPr_MoveS2_360	21	66	rechts	weiblich	102	3	neuInnen	neutralInnen	List4	rechts.bmp	1	3	342440	3	409	342849
RespPr_MoveS2_360	21	66	rechts	weiblich	103	1	unrel	rechts	List4	links.bmp	1	1	344639	1	450	345089
RespPr_MoveS2_360	21	66	rechts	weiblich	104	1	neuAussen	neutralAussen	List4	links.bmp	1	1	346865	1	544	347409
RespPr_MoveS2_360	21	66	rechts	weiblich	105	3	rel	rechts	List4	rechts.bmp	1	3	349211	3	334	349545
RespPr_MoveS2_360	21	66	rechts	weiblich	106	1	neuAussen	neutralAussen	List4	links.bmp	1	1	351343	1	434	351777
RespPr_MoveS2_360	21	66	rechts	weiblich	107	1	neuInnen	neutralInnen	List4	links.bmp	1	1	353569	1	440	354009
RespPr_MoveS2_360	21	66	rechts	weiblich	108	1	unrel	rechts	List4	links.bmp	1	1	355809	1	528	356337
RespPr_MoveS2_360	21	66	rechts	weiblich	109	3	unrel	links	List4	rechts.bmp	1	3	358128	3	401	358529
RespPr_MoveS2_360	21	66	rechts	weiblich	110	1	unrel	rechts	List4	links.bmp	1	1	360327	1	338	360665
RespPr_MoveS2_360	21	66	rechts	weiblich	111	3	unrel	links	List4	rechts.bmp	1	3	362460	3	437	362897
RespPr_MoveS2_360	21	66	rechts	weiblich	112	3	unrel	links	List4	rechts.bmp	1	3	364699	3	350	365049
RespPr_MoveS2_360	21	66	rechts	weiblich	113	3	rel	rechts	List4	rechts.bmp	1	3	366845	3	492	367337
RespPr_MoveS2_360	21	66	rechts	weiblich	114	3	unrel	links	List4	rechts.bmp	1	3	369138	3	463	369601
RespPr_MoveS2_360	21	66	rechts	weiblich	115	1	rel	links	List4	links.bmp	1	1	371390	1	363	371753
RespPr_MoveS2_360	21	66	rechts	weiblich	116	3	neuInnen	neutralInnen	List4	rechts.bmp	1	3	373549	3	323	373872
RespPr_MoveS2_360	21	66	rechts	weiblich	117	1	rel	links	List4	links.bmp	1	1	375669	1	443	376112
RespPr_MoveS2_360	21	66	rechts	weiblich	118	1	unrel	rechts	List4	links.bmp	1	1	377908	1	357	378265
RespPr_MoveS2_360	21	66	rechts	weiblich	119	1	unrel	rechts	List4	links.bmp	1	1	380054	1	419	380473
RespPr_MoveS2_360	21	66	rechts	weiblich	120	1	neuInnen	neutralInnen	List4	links.bmp	1	1	382267	1	446	382713
RespPr_MoveS2_360	21	66	rechts	weiblich	121	1	unrel	rechts	List5	links.bmp	1	1	389584	1	433	390017
RespPr_MoveS2_360	21	66	rechts	weiblich	122	3	unrel	links	List5	rechts.bmp	1	3	391810	3	406	392216
RespPr_MoveS2_360	21	66	rechts	weiblich	123	1	rel	links	List5	links.bmp	1	1	393996	1	372	394368
RespPr_MoveS2_360	21	66	rechts	weiblich	124	1	rel	links	List5	links.bmp	1	1	396169	1	384	396553
RespPr_MoveS2_360	21	66	rechts	weiblich	125	1	neuInnen	neutralInnen	List5	links.bmp	1	1	398355	1	422	398777
RespPr_MoveS2_360	21	66	rechts	weiblich	126	1	neuAussen	neutralAussen	List5	links.bmp	1	1	400567	1	378	400945
RespPr_MoveS2_360	21	66	rechts	weiblich	127	3	neuAussen	neutralAussen	List5	rechts.bmp	1	3	402740	3	517	403257
RespPr_MoveS2_360	21	66	rechts	weiblich	128	1	rel	links	List5	links.bmp	1	1	405059	1	373	405432
RespPr_MoveS2_360	21	66	rechts	weiblich	129	1	unrel	rechts	List5	links.bmp	1	1	407232	1	489	407721
RespPr_MoveS2_360	21	66	rechts	weiblich	130	3	neuAussen	neutralAussen	List5	rechts.bmp	1	3	409511	3	490	410001
RespPr_MoveS2_360	21	66	rechts	weiblich	131	3	unrel	links	List5	rechts.bmp	1	3	411790	3	539	412329
RespPr_MoveS2_360	21	66	rechts	weiblich	132	1	neuInnen	neutralInnen	List5	links.bmp	1	1	414123	1	445	414568
RespPr_MoveS2_360	21	66	rechts	weiblich	133	1	rel	links	List5	links.bmp	1	1	416362	1	383	416745
RespPr_MoveS2_360	21	66	rechts	weiblich	134	1	unrel	rechts	List5	links.bmp	1	1	418535	1	402	418937
RespPr_MoveS2_360	21	66	rechts	weiblich	135	3	unrel	links	List5	rechts.bmp	1	3	420734	3	402	421136
RespPr_MoveS2_360	21	66	rechts	weiblich	136	3	rel	rechts	List5	rechts.bmp	1	3	422933	3	412	423345
RespPr_MoveS2_360	21	66	rechts	weiblich	137	3	rel	rechts	List5	rechts.bmp	1	3	425146	3	390	425536
RespPr_MoveS2_360	21	66	rechts	weiblich	138	1	neuAussen	neutralAussen	List5	links.bmp	1	1	427332	1	413	427745
RespPr_MoveS2_360	21	66	rechts	weiblich	139	3	unrel	links	List5	rechts.bmp	1	3	429531	3	446	429977
RespPr_MoveS2_360	21	66	rechts	weiblich	140	3	rel	rechts	List5	rechts.bmp	1	3	431770	3	407	432177
RespPr_MoveS2_360	21	66	rechts	weiblich	141	1	rel	links	List5	links.bmp	1	1	433969	1	487	434456
RespPr_MoveS2_360	21	66	rechts	weiblich	142	1	unrel	rechts	List5	links.bmp	1	1	436249	1	376	436625
RespPr_MoveS2_360	21	66	rechts	weiblich	143	1	unrel	rechts	List5	links.bmp	1	1	438408	1	408	438816
RespPr_MoveS2_360	21	66	rechts	weiblich	144	1	unrel	rechts	List5	links.bmp	1	1	440594	1	415	441009
RespPr_MoveS2_360	21	66	rechts	weiblich	145	1	rel	links	List5	links.bmp	1	1	442807	1	386	443193
RespPr_MoveS2_360	21	66	rechts	weiblich	146	3	rel	rechts	List5	rechts.bmp	1	3	444993	3	472	445465
RespPr_MoveS2_360	21	66	rechts	weiblich	147	3	unrel	links	List5	rechts.bmp	1	3	447258	3	438	447696
RespPr_MoveS2_360	21	66	rechts	weiblich	148	3	neuAussen	neutralAussen	List5	rechts.bmp	1	3	449498	3	446	449944
RespPr_MoveS2_360	21	66	rechts	weiblich	149	3	neuInnen	neutralInnen	List5	rechts.bmp	1	3	451737	3	384	452121
RespPr_MoveS2_360	21	66	rechts	weiblich	150	3	rel	rechts	List5	rechts.bmp	1	3	453923	3	382	454305
RespPr_MoveS2_360	21	66	rechts	weiblich	151	1	neuAussen	neutralAussen	List5	links.bmp	1	1	456096	1	409	456505
RespPr_MoveS2_360	21	66	rechts	weiblich	152	3	neuInnen	neutralInnen	List5	rechts.bmp	1	3	458295	3	442	458737
RespPr_MoveS2_360	21	66	rechts	weiblich	153	3	rel	rechts	List5	rechts.bmp	1	3	460534	3	394	460928
RespPr_MoveS2_360	21	66	rechts	weiblich	154	3	neuInnen	neutralInnen	List5	rechts.bmp	1	3	462720	3	312	463032
RespPr_MoveS2_360	21	66	rechts	weiblich	155	3	unrel	links	List5	rechts.bmp	1	3	464826	3	590	465416
RespPr_MoveS2_360	21	66	rechts	weiblich	156	1	neuInnen	neutralInnen	List5	links.bmp	1	1	467212	1	421	467633
RespPr_MoveS2_360	22	79	rechts	maennlich	1	1	rel	links	List1	links.bmp	1	1	122321	1	680	123001
RespPr_MoveS2_360	22	79	rechts	maennlich	2	1	rel	links	List1	links.bmp	1	1	124801	1	673	125474
RespPr_MoveS2_360	22	79	rechts	maennlich	3	1	neuAussen	neutralAussen	List1	links.bmp	1	1	127253	1	485	127738
RespPr_MoveS2_360	22	79	rechts	maennlich	4	3	rel	rechts	List1	rechts.bmp	1	3	129519	3	419	129938
RespPr_MoveS2_360	22	79	rechts	maennlich	5	3	rel	rechts	List1	rechts.bmp	1	3	131732	3	469	132201
RespPr_MoveS2_360	22	79	rechts	maennlich	6	3	unrel	links	List1	rechts.bmp	1	3	133997	3	501	134498
RespPr_MoveS2_360	22	79	rechts	maennlich	7	1	neuInnen	neutralInnen	List1	links.bmp	1	1	136290	1	544	136834
RespPr_MoveS2_360	22	79	rechts	maennlich	8	3	neuAussen	neutralAussen	List1	rechts.bmp	1	3	138636	3	390	139026
RespPr_MoveS2_360	22	79	rechts	maennlich	9	3	neuInnen	neutralInnen	List1	rechts.bmp	1	3	140822	3	492	141314
RespPr_MoveS2_360	22	79	rechts	maennlich	10	3	unrel	links	List1	rechts.bmp	1	3	143114	3	488	143602
RespPr_MoveS2_360	22	79	rechts	maennlich	11	1	unrel	rechts	List1	links.bmp	1	1	145394	1	520	145914
RespPr_MoveS2_360	22	79	rechts	maennlich	12	1	unrel	rechts	List1	links.bmp	1	1	147713	1	577	148290
RespPr_MoveS2_360	22	79	rechts	maennlich	13	3	neuAussen	neutralAussen	List2	rechts.bmp	1	3	166800	3	698	167498
RespPr_MoveS2_360	22	79	rechts	maennlich	14	1	unrel	rechts	List2	links.bmp	1	1	169292	1	494	169786
RespPr_MoveS2_360	22	79	rechts	maennlich	15	3	rel	rechts	List2	rechts.bmp	1	3	171585	3	401	171986
RespPr_MoveS2_360	22	79	rechts	maennlich	16	3	rel	rechts	List2	rechts.bmp	1	3	173771	3	454	174225
RespPr_MoveS2_360	22	79	rechts	maennlich	17	1	rel	links	List2	links.bmp	1	1	176024	1	385	176409
RespPr_MoveS2_360	22	79	rechts	maennlich	18	1	unrel	rechts	List2	links.bmp	1	1	178210	1	623	178833
RespPr_MoveS2_360	22	79	rechts	maennlich	19	3	neuInnen	neutralInnen	List2	rechts.bmp	1	3	180622	3	380	181002
RespPr_MoveS2_360	22	79	rechts	maennlich	20	1	unrel	rechts	List2	links.bmp	1	1	182795	1	454	183249
RespPr_MoveS2_360	22	79	rechts	maennlich	21	3	neuAussen	neutralAussen	List2	rechts.bmp	1	3	185034	3	447	185481
RespPr_MoveS2_360	22	79	rechts	maennlich	22	1	neuAussen	neutralAussen	List2	links.bmp	1	1	187273	1	425	187698
RespPr_MoveS2_360	22	79	rechts	maennlich	23	3	rel	rechts	List2	rechts.bmp	1	3	189499	3	455	189954
RespPr_MoveS2_360	22	79	rechts	maennlich	24	1	rel	links	List2	links.bmp	1	1	191752	1	418	192170
RespPr_MoveS2_360	22	79	rechts	maennlich	25	1	rel	links	List2	links.bmp	1	1	193951	1	467	194418
RespPr_MoveS2_360	22	79	rechts	maennlich	26	1	neuInnen	neutralInnen	List2	links.bmp	1	1	196217	1	432	196649
RespPr_MoveS2_360	22	79	rechts	maennlich	27	3	unrel	links	List2	rechts.bmp	1	3	198443	3	455	198898
RespPr_MoveS2_360	22	79	rechts	maennlich	28	3	unrel	links	List2	rechts.bmp	1	3	200695	3	434	201129
RespPr_MoveS2_360	22	79	rechts	maennlich	29	3	unrel	links	List2	rechts.bmp	1	3	202908	3	469	203377
RespPr_MoveS2_360	22	79	rechts	maennlich	30	1	neuInnen	neutralInnen	List2	links.bmp	1	1	205174	1	411	205585
RespPr_MoveS2_360	22	79	rechts	maennlich	31	1	unrel	rechts	List2	links.bmp	1	1	207387	1	454	207841
RespPr_MoveS2_360	22	79	rechts	maennlich	32	3	rel	rechts	List2	rechts.bmp	1	3	209639	3	443	210082
RespPr_MoveS2_360	22	79	rechts	maennlich	33	1	neuAussen	neutralAussen	List2	links.bmp	1	1	211865	1	505	212370
RespPr_MoveS2_360	22	79	rechts	maennlich	34	1	rel	links	List2	links.bmp	1	1	214171	1	463	214634
RespPr_MoveS2_360	22	79	rechts	maennlich	35	3	neuInnen	neutralInnen	List2	rechts.bmp	1	3	216424	3	457	216881
RespPr_MoveS2_360	22	79	rechts	maennlich	36	3	rel	rechts	List2	rechts.bmp	1	3	218676	3	598	219274
RespPr_MoveS2_360	22	79	rechts	maennlich	37	3	unrel	links	List2	rechts.bmp	1	3	221062	3	612	221674
RespPr_MoveS2_360	22	79	rechts	maennlich	38	1	neuAussen	neutralAussen	List2	links.bmp	1	1	223475	1	494	223969
RespPr_MoveS2_360	22	79	rechts	maennlich	39	1	unrel	rechts	List2	links.bmp	1	1	225767	1	515	226282
RespPr_MoveS2_360	22	79	rechts	maennlich	40	1	neuInnen	neutralInnen	List2	links.bmp	1	1	228073	1	504	228577
RespPr_MoveS2_360	22	79	rechts	maennlich	41	3	unrel	links	List2	rechts.bmp	1	3	230379	3	526	230905
RespPr_MoveS2_360	22	79	rechts	maennlich	42	3	neuInnen	neutralInnen	List2	rechts.bmp	1	3	232698	3	528	233226
RespPr_MoveS2_360	22	79	rechts	maennlich	43	1	unrel	rechts	List2	links.bmp	1	1	235017	1	552	235569
RespPr_MoveS2_360	22	79	rechts	maennlich	44	1	rel	links	List2	links.bmp	1	1	237350	1	556	237906
RespPr_MoveS2_360	22	79	rechts	maennlich	45	3	rel	rechts	List2	rechts.bmp	1	3	239696	3	498	240194
RespPr_MoveS2_360	22	79	rechts	maennlich	46	1	rel	links	List2	links.bmp	1	1	241988	1	461	242449
RespPr_MoveS2_360	22	79	rechts	maennlich	47	3	neuAussen	neutralAussen	List2	rechts.bmp	1	3	244241	3	457	244698
RespPr_MoveS2_360	22	79	rechts	maennlich	48	3	unrel	links	List2	rechts.bmp	1	3	246494	3	619	247113
RespPr_MoveS2_360	22	79	rechts	maennlich	49	3	neuInnen	neutralInnen	List3	rechts.bmp	1	3	253438	3	644	254082
RespPr_MoveS2_360	22	79	rechts	maennlich	50	1	neuInnen	neutralInnen	List3	links.bmp	1	1	255877	1	428	256305
RespPr_MoveS2_360	22	79	rechts	maennlich	51	3	neuInnen	neutralInnen	List3	rechts.bmp	1	3	258103	3	555	258658
RespPr_MoveS2_360	22	79	rechts	maennlich	52	1	neuInnen	neutralInnen	List3	links.bmp	1	1	260449	1	473	260922
RespPr_MoveS2_360	22	79	rechts	maennlich	53	1	unrel	rechts	List3	links.bmp	1	1	262715	1	423	263138
RespPr_MoveS2_360	22	79	rechts	maennlich	54	3	unrel	links	List3	rechts.bmp	1	3	264927	3	443	265370
RespPr_MoveS2_360	22	79	rechts	maennlich	55	3	rel	rechts	List3	rechts.bmp	1	3	267167	3	603	267770
RespPr_MoveS2_360	22	79	rechts	maennlich	56	1	unrel	rechts	List3	links.bmp	1	1	269566	1	428	269994
RespPr_MoveS2_360	22	79	rechts	maennlich	57	1	neuAussen	neutralAussen	List3	links.bmp	1	1	271792	1	466	272258
RespPr_MoveS2_360	22	79	rechts	maennlich	58	3	unrel	links	List3	rechts.bmp	1	3	274071	3	475	274546
RespPr_MoveS2_360	22	79	rechts	maennlich	59	1	unrel	rechts	List3	links.bmp	1	1	276337	1	449	276786
RespPr_MoveS2_360	22	79	rechts	maennlich	60	1	rel	links	List3	links.bmp	1	1	278563	1	495	279058
RespPr_MoveS2_360	22	79	rechts	maennlich	61	1	rel	links	List3	links.bmp	1	1	280856	1	490	281346
RespPr_MoveS2_360	22	79	rechts	maennlich	62	1	neuAussen	neutralAussen	List3	links.bmp	1	1	283148	1	470	283618
RespPr_MoveS2_360	22	79	rechts	maennlich	63	3	unrel	links	List3	rechts.bmp	1	3	285414	3	380	285794
RespPr_MoveS2_360	22	79	rechts	maennlich	64	3	unrel	links	List3	rechts.bmp	1	3	287587	3	495	288082
RespPr_MoveS2_360	22	79	rechts	maennlich	65	3	neuAussen	neutralAussen	List3	rechts.bmp	1	3	289866	3	504	290370
RespPr_MoveS2_360	22	79	rechts	maennlich	66	3	unrel	links	List3	rechts.bmp	1	3	292172	3	494	292666
RespPr_MoveS2_360	22	79	rechts	maennlich	67	1	neuAussen	neutralAussen	List3	links.bmp	1	1	294464	1	442	294906
RespPr_MoveS2_360	22	79	rechts	maennlich	68	3	unrel	links	List3	rechts.bmp	1	3	296744	3	410	297154
RespPr_MoveS2_360	22	79	rechts	maennlich	69	1	unrel	rechts	List3	links.bmp	1	1	298956	1	373	299329
RespPr_MoveS2_360	22	79	rechts	maennlich	70	1	neuInnen	neutralInnen	List3	links.bmp	1	1	301129	1	400	301529
RespPr_MoveS2_360	22	79	rechts	maennlich	71	3	rel	rechts	List3	rechts.bmp	1	3	303328	3	361	303689
RespPr_MoveS2_360	22	79	rechts	maennlich	72	3	rel	rechts	List3	rechts.bmp	1	3	305487	3	419	305906
RespPr_MoveS2_360	22	79	rechts	maennlich	73	3	neuAussen	neutralAussen	List3	rechts.bmp	1	3	307700	3	414	308114
RespPr_MoveS2_360	22	79	rechts	maennlich	74	3	rel	rechts	List3	rechts.bmp	1	3	309913	3	377	310290
RespPr_MoveS2_360	22	79	rechts	maennlich	75	3	neuAussen	neutralAussen	List3	rechts.bmp	1	3	312085	3	365	312450
RespPr_MoveS2_360	22	79	rechts	maennlich	76	1	rel	links	List3	links.bmp	1	1	314245	1	532	314777
RespPr_MoveS2_360	22	79	rechts	maennlich	77	3	neuInnen	neutralInnen	List3	rechts.bmp	1	3	316577	3	425	317002
RespPr_MoveS2_360	22	79	rechts	maennlich	78	3	rel	rechts	List3	rechts.bmp	1	3	318803	3	471	319274
RespPr_MoveS2_360	22	79	rechts	maennlich	79	1	rel	links	List3	links.bmp	1	1	321069	1	461	321530
RespPr_MoveS2_360	22	79	rechts	maennlich	80	1	unrel	rechts	List3	links.bmp	1	1	323322	1	448	323770
RespPr_MoveS2_360	22	79	rechts	maennlich	81	1	rel	links	List3	links.bmp	1	1	325561	1	544	326105
RespPr_MoveS2_360	22	79	rechts	maennlich	82	1	unrel	rechts	List3	links.bmp	1	1	327907	1	638	328545
RespPr_MoveS2_360	22	79	rechts	maennlich	83	3	rel	rechts	List3	rechts.bmp	1	3	330346	3	624	330970
RespPr_MoveS2_360	22	79	rechts	maennlich	84	1	rel	links	List3	links.bmp	1	1	332772	1	494	333266
RespPr_MoveS2_360	22	79	rechts	maennlich	85	1	rel	links	List4	links.bmp	1	1	363375	1	562	363937
RespPr_MoveS2_360	22	79	rechts	maennlich	86	3	unrel	links	List4	rechts.bmp	1	3	365734	3	452	366186
RespPr_MoveS2_360	22	79	rechts	maennlich	87	3	neuInnen	neutralInnen	List4	rechts.bmp	1	3	367987	3	463	368450
RespPr_MoveS2_360	22	79	rechts	maennlich	88	1	unrel	rechts	List4	links.bmp	1	1	370226	1	528	370754
RespPr_MoveS2_360	22	79	rechts	maennlich	89	1	neuAussen	neutralAussen	List4	links.bmp	1	1	372545	1	448	372993
RespPr_MoveS2_360	22	79	rechts	maennlich	90	1	unrel	rechts	List4	links.bmp	1	1	374785	1	441	375226
RespPr_MoveS2_360	22	79	rechts	maennlich	91	3	rel	rechts	List4	rechts.bmp	1	3	377024	3	458	377482
RespPr_MoveS2_360	22	79	rechts	maennlich	92	1	rel	links	List4	links.bmp	1	1	379263	1	459	379722
RespPr_MoveS2_360	22	79	rechts	maennlich	93	1	neuAussen	neutralAussen	List4	links.bmp	1	1	381516	1	582	382098
RespPr_MoveS2_360	22	79	rechts	maennlich	94	1	neuInnen	neutralInnen	List4	links.bmp	1	1	383888	1	577	384465
RespPr_MoveS2_360	22	79	rechts	maennlich	95	1	rel	links	List4	links.bmp	1	1	386261	1	517	386778
RespPr_MoveS2_360	22	79	rechts	maennlich	96	1	unrel	rechts	List4	links.bmp	1	1	388580	1	517	389097
RespPr_MoveS2_360	22	79	rechts	maennlich	97	1	unrel	rechts	List4	links.bmp	1	1	390899	1	527	391426
RespPr_MoveS2_360	22	79	rechts	maennlich	98	1	neuInnen	neutralInnen	List4	links.bmp	1	1	393218	1	519	393737
RespPr_MoveS2_360	22	79	rechts	maennlich	99	3	neuInnen	neutralInnen	List4	rechts.bmp	1	3	395538	3	456	395994
RespPr_MoveS2_360	22	79	rechts	maennlich	100	1	neuAussen	neutralAussen	List4	links.bmp	1	1	397790	1	716	398506
RespPr_MoveS2_360	22	79	rechts	maennlich	101	3	neuInnen	neutralInnen	List4	rechts.bmp	1	3	400296	3	521	400817
RespPr_MoveS2_360	22	79	rechts	maennlich	102	3	neuAussen	neutralAussen	List4	rechts.bmp	1	3	402602	3	688	403290
RespPr_MoveS2_360	22	79	rechts	maennlich	103	3	neuAussen	neutralAussen	List4	rechts.bmp	1	3	405081	3	529	405610
RespPr_MoveS2_360	22	79	rechts	maennlich	104	1	rel	links	List4	links.bmp	1	1	407400	1	458	407858
RespPr_MoveS2_360	22	79	rechts	maennlich	105	3	neuAussen	neutralAussen	List4	rechts.bmp	1	3	409653	3	405	410058
RespPr_MoveS2_360	22	79	rechts	maennlich	106	3	unrel	links	List4	rechts.bmp	1	3	411852	3	398	412250
RespPr_MoveS2_360	22	79	rechts	maennlich	107	1	neuInnen	neutralInnen	List4	links.bmp	1	1	414052	1	445	414497
RespPr_MoveS2_360	22	79	rechts	maennlich	108	3	unrel	links	List4	rechts.bmp	1	3	416291	3	559	416850
RespPr_MoveS2_360	22	79	rechts	maennlich	109	3	unrel	links	List4	rechts.bmp	1	3	418650	3	471	419121
RespPr_MoveS2_360	22	79	rechts	maennlich	110	1	rel	links	List4	links.bmp	1	1	420916	1	366	421282
RespPr_MoveS2_360	22	79	rechts	maennlich	111	3	rel	rechts	List4	rechts.bmp	1	3	423075	3	375	423450
RespPr_MoveS2_360	22	79	rechts	maennlich	112	3	rel	rechts	List4	rechts.bmp	1	3	425248	3	370	425618
RespPr_MoveS2_360	22	79	rechts	maennlich	113	1	unrel	rechts	List4	links.bmp	1	1	427407	1	410	427817
RespPr_MoveS2_360	22	79	rechts	maennlich	114	3	unrel	links	List4	rechts.bmp	1	3	429620	3	317	429937
RespPr_MoveS2_360	22	79	rechts	maennlich	115	3	unrel	links	List4	rechts.bmp	1	3	431739	3	367	432106
RespPr_MoveS2_360	22	79	rechts	maennlich	116	1	rel	links	List4	links.bmp	1	1	433885	1	445	434330
RespPr_MoveS2_360	22	79	rechts	maennlich	117	3	rel	rechts	List4	rechts.bmp	1	3	436124	3	373	436497
RespPr_MoveS2_360	22	79	rechts	maennlich	118	1	unrel	rechts	List4	links.bmp	1	1	438297	1	481	438778
RespPr_MoveS2_360	22	79	rechts	maennlich	119	3	rel	rechts	List4	rechts.bmp	1	3	440576	3	418	440994
RespPr_MoveS2_360	22	79	rechts	maennlich	120	3	rel	rechts	List4	rechts.bmp	1	3	442789	3	413	443202
RespPr_MoveS2_360	22	79	rechts	maennlich	121	3	rel	rechts	List5	rechts.bmp	1	3	451986	3	439	452425
RespPr_MoveS2_360	22	79	rechts	maennlich	122	1	unrel	rechts	List5	links.bmp	1	1	454225	1	424	454649
RespPr_MoveS2_360	22	79	rechts	maennlich	123	1	rel	links	List5	links.bmp	1	1	456451	1	583	457034
RespPr_MoveS2_360	22	79	rechts	maennlich	124	3	neuAussen	neutralAussen	List5	rechts.bmp	1	3	458810	3	368	459178
RespPr_MoveS2_360	22	79	rechts	maennlich	125	1	neuAussen	neutralAussen	List5	links.bmp	1	1	460956	1	390	461346
RespPr_MoveS2_360	22	79	rechts	maennlich	126	3	unrel	links	List5	rechts.bmp	1	3	463142	3	324	463466
RespPr_MoveS2_360	22	79	rechts	maennlich	127	3	unrel	links	List5	rechts.bmp	1	3	465248	3	386	465634
RespPr_MoveS2_360	22	79	rechts	maennlich	128	1	neuAussen	neutralAussen	List5	links.bmp	1	1	467434	1	439	467873
RespPr_MoveS2_360	22	79	rechts	maennlich	129	3	neuInnen	neutralInnen	List5	rechts.bmp	1	3	469673	3	376	470049
RespPr_MoveS2_360	22	79	rechts	maennlich	130	1	neuInnen	neutralInnen	List5	links.bmp	1	1	471846	1	339	472185
RespPr_MoveS2_360	22	79	rechts	maennlich	131	1	rel	links	List5	links.bmp	1	1	473965	1	341	474306
RespPr_MoveS2_360	22	79	rechts	maennlich	132	1	rel	links	List5	links.bmp	1	1	476098	1	408	476506
RespPr_MoveS2_360	22	79	rechts	maennlich	133	3	unrel	links	List5	rechts.bmp	1	3	478297	3	353	478650
RespPr_MoveS2_360	22	79	rechts	maennlich	134	3	unrel	links	List5	rechts.bmp	1	3	480443	3	359	480802
RespPr_MoveS2_360	22	79	rechts	maennlich	135	1	unrel	rechts	List5	links.bmp	1	1	482602	1	391	482993
RespPr_MoveS2_360	22	79	rechts	maennlich	136	1	rel	links	List5	links.bmp	1	1	484788	1	413	485201
RespPr_MoveS2_360	22	79	rechts	maennlich	137	1	neuInnen	neutralInnen	List5	links.bmp	1	1	487001	1	369	487370
RespPr_MoveS2_360	22	79	rechts	maennlich	138	3	neuAussen	neutralAussen	List5	rechts.bmp	1	3	489160	3	673	489833
RespPr_MoveS2_360	22	79	rechts	maennlich	139	3	neuInnen	neutralInnen	List5	rechts.bmp	1	3	491626	3	368	491994
RespPr_MoveS2_360	22	79	rechts	maennlich	140	3	rel	rechts	List5	rechts.bmp	1	3	493785	3	528	494313
RespPr_MoveS2_360	22	79	rechts	maennlich	141	1	unrel	rechts	List5	links.bmp	1	1	496104	1	345	496449
RespPr_MoveS2_360	22	79	rechts	maennlich	142	1	unrel	rechts	List5	links.bmp	1	1	498237	1	493	498730
RespPr_MoveS2_360	22	79	rechts	maennlich	143	1	rel	links	List5	links.bmp	1	1	500530	1	392	500922
RespPr_MoveS2_360	22	79	rechts	maennlich	144	1	rel	links	List5	links.bmp	1	1	502716	1	405	503121
RespPr_MoveS2_360	22	79	rechts	maennlich	145	3	neuInnen	neutralInnen	List5	rechts.bmp	1	3	504915	3	431	505346
RespPr_MoveS2_360	22	79	rechts	maennlich	146	3	neuAussen	neutralAussen	List5	rechts.bmp	1	3	507141	3	404	507545
RespPr_MoveS2_360	22	79	rechts	maennlich	147	1	unrel	rechts	List5	links.bmp	1	1	509340	1	470	509810
RespPr_MoveS2_360	22	79	rechts	maennlich	148	3	rel	rechts	List5	rechts.bmp	1	3	511606	3	435	512041
RespPr_MoveS2_360	22	79	rechts	maennlich	149	3	unrel	links	List5	rechts.bmp	1	3	513832	3	417	514249
RespPr_MoveS2_360	22	79	rechts	maennlich	150	3	rel	rechts	List5	rechts.bmp	1	3	516044	3	422	516466
RespPr_MoveS2_360	22	79	rechts	maennlich	151	3	unrel	links	List5	rechts.bmp	1	3	518257	3	577	518834
RespPr_MoveS2_360	22	79	rechts	maennlich	152	1	neuAussen	neutralAussen	List5	links.bmp	1	1	520630	1	427	521057
RespPr_MoveS2_360	22	79	rechts	maennlich	153	1	neuInnen	neutralInnen	List5	links.bmp	1	1	522856	1	633	523489
RespPr_MoveS2_360	22	79	rechts	maennlich	154	3	rel	rechts	List5	rechts.bmp	1	3	525281	3	417	525698
RespPr_MoveS2_360	22	79	rechts	maennlich	155	3	rel	rechts	List5	rechts.bmp	1	3	527494	3	499	527993
RespPr_MoveS2_360	22	79	rechts	maennlich	156	1	unrel	rechts	List5	links.bmp	1	1	529787	1	519	530306
RespPr_MoveS2_360	23	63	rechts	weiblich	1	1	rel	links	List1	links.bmp	1	1	83855	1	661	84516
RespPr_MoveS2_360	23	63	rechts	weiblich	2	3	unrel	links	List1	rechts.bmp	1	3	86308	3	664	86972
RespPr_MoveS2_360	23	63	rechts	weiblich	3	3	unrel	links	List1	rechts.bmp	1	3	88773	3	678	89451
RespPr_MoveS2_360	23	63	rechts	weiblich	4	1	neuInnen	neutralInnen	List1	links.bmp	1	1	91253	1	607	91860
RespPr_MoveS2_360	23	63	rechts	weiblich	5	3	rel	rechts	List1	rechts.bmp	1	3	93652	3	584	94236
RespPr_MoveS2_360	23	63	rechts	weiblich	6	1	neuAussen	neutralAussen	List1	links.bmp	1	1	96038	1	494	96532
RespPr_MoveS2_360	23	63	rechts	weiblich	7	1	unrel	rechts	List1	links.bmp	1	1	98317	1	646	98963
RespPr_MoveS2_360	23	63	rechts	weiblich	8	3	neuAussen	neutralAussen	List1	rechts.bmp	1	3	100756	3	791	101547
RespPr_MoveS2_360	23	63	rechts	weiblich	9	3	rel	rechts	List1	rechts.bmp	1	3	103342	3	702	104044
RespPr_MoveS2_360	23	63	rechts	weiblich	10	3	neuInnen	neutralInnen	List1	rechts.bmp	1	3	105834	3	658	106492
RespPr_MoveS2_360	23	63	rechts	weiblich	11	1	rel	links	List1	links.bmp	1	1	108287	1	628	108915
RespPr_MoveS2_360	23	63	rechts	weiblich	12	1	unrel	rechts	List1	links.bmp	1	1	110713	1	587	111300
RespPr_MoveS2_360	23	63	rechts	weiblich	13	3	unrel	links	List2	rechts.bmp	1	3	128147	3	601	128748
RespPr_MoveS2_360	23	63	rechts	weiblich	14	3	neuAussen	neutralAussen	List2	rechts.bmp	1	3	130533	3	454	130987
RespPr_MoveS2_360	23	63	rechts	weiblich	15	1	neuInnen	neutralInnen	List2	links.bmp	1	1	132786	1	426	133212
RespPr_MoveS2_360	23	63	rechts	weiblich	16	1	rel	links	List2	links.bmp	1	1	135011	1	457	135468
RespPr_MoveS2_360	23	63	rechts	weiblich	17	3	rel	rechts	List2	rechts.bmp	1	3	137264	3	428	137692
RespPr_MoveS2_360	23	63	rechts	weiblich	18	1	unrel	rechts	List2	links.bmp	1	1	139490	1	513	140003
RespPr_MoveS2_360	23	63	rechts	weiblich	19	1	rel	links	List2	links.bmp	1	1	141796	1	504	142300
RespPr_MoveS2_360	23	63	rechts	weiblich	20	1	neuAussen	neutralAussen	List2	links.bmp	1	1	144102	1	486	144588
RespPr_MoveS2_360	23	63	rechts	weiblich	21	3	neuAussen	neutralAussen	List2	rechts.bmp	1	3	146381	3	438	146819
RespPr_MoveS2_360	23	63	rechts	weiblich	22	1	unrel	rechts	List2	links.bmp	1	1	148607	1	445	149052
RespPr_MoveS2_360	23	63	rechts	weiblich	23	3	neuAussen	neutralAussen	List2	rechts.bmp	1	3	150846	3	334	151180
RespPr_MoveS2_360	23	63	rechts	weiblich	24	3	neuInnen	neutralInnen	List2	rechts.bmp	1	3	152979	3	505	153484
RespPr_MoveS2_360	23	63	rechts	weiblich	25	1	neuAussen	neutralAussen	List2	links.bmp	1	1	155285	1	422	155707
RespPr_MoveS2_360	23	63	rechts	weiblich	26	1	unrel	rechts	List2	links.bmp	1	1	157484	1	479	157963
RespPr_MoveS2_360	23	63	rechts	weiblich	27	1	rel	links	List2	links.bmp	1	1	159750	1	549	160299
RespPr_MoveS2_360	23	63	rechts	weiblich	28	1	neuInnen	neutralInnen	List2	links.bmp	1	1	162096	1	483	162579
RespPr_MoveS2_360	23	63	rechts	weiblich	29	3	unrel	links	List2	rechts.bmp	1	3	164375	3	405	164780
RespPr_MoveS2_360	23	63	rechts	weiblich	30	3	rel	rechts	List2	rechts.bmp	1	3	166561	3	490	167051
RespPr_MoveS2_360	23	63	rechts	weiblich	31	3	neuInnen	neutralInnen	List2	rechts.bmp	1	3	168854	3	493	169347
RespPr_MoveS2_360	23	63	rechts	weiblich	32	3	rel	rechts	List2	rechts.bmp	1	3	171146	3	481	171627
RespPr_MoveS2_360	23	63	rechts	weiblich	33	3	unrel	links	List2	rechts.bmp	1	3	173425	3	426	173851
RespPr_MoveS2_360	23	63	rechts	weiblich	34	3	rel	rechts	List2	rechts.bmp	1	3	175638	3	446	176084
RespPr_MoveS2_360	23	63	rechts	weiblich	35	1	neuAussen	neutralAussen	List2	links.bmp	1	1	177864	1	524	178388
RespPr_MoveS2_360	23	63	rechts	weiblich	36	1	unrel	rechts	List2	links.bmp	1	1	180183	1	533	180716
RespPr_MoveS2_360	23	63	rechts	weiblich	37	1	unrel	rechts	List2	links.bmp	1	1	182516	1	487	183003
RespPr_MoveS2_360	23	63	rechts	weiblich	38	3	unrel	links	List2	rechts.bmp	1	3	184795	3	481	185276
RespPr_MoveS2_360	23	63	rechts	weiblich	39	1	rel	links	List2	links.bmp	1	1	187061	1	462	187523
RespPr_MoveS2_360	23	63	rechts	weiblich	40	1	rel	links	List2	links.bmp	1	1	189314	1	522	189836
RespPr_MoveS2_360	23	63	rechts	weiblich	41	3	unrel	links	List2	rechts.bmp	1	3	191633	3	634	192267
RespPr_MoveS2_360	23	63	rechts	weiblich	42	3	neuInnen	neutralInnen	List2	rechts.bmp	1	3	194059	3	649	194708
RespPr_MoveS2_360	23	63	rechts	weiblich	43	3	rel	rechts	List2	rechts.bmp	1	3	196498	3	522	197020
RespPr_MoveS2_360	23	63	rechts	weiblich	44	1	neuInnen	neutralInnen	List2	links.bmp	1	1	198817	1	371	199188
RespPr_MoveS2_360	23	63	rechts	weiblich	45	3	unrel	links	List2	rechts.bmp	1	3	200990	3	486	201476
RespPr_MoveS2_360	23	63	rechts	weiblich	46	3	rel	rechts	List2	rechts.bmp	1	3	203269	3	495	203764
RespPr_MoveS2_360	23	63	rechts	weiblich	47	1	unrel	rechts	List2	links.bmp	1	1	205561	1	411	205972
RespPr_MoveS2_360	23	63	rechts	weiblich	48	1	rel	links	List2	links.bmp	1	1	207774	1	501	208275
RespPr_MoveS2_360	23	63	rechts	weiblich	49	1	rel	links	List3	links.bmp	1	1	223675	1	649	224324
RespPr_MoveS2_360	23	63	rechts	weiblich	50	1	neuAussen	neutralAussen	List3	links.bmp	1	1	226115	1	529	226644
RespPr_MoveS2_360	23	63	rechts	weiblich	51	1	unrel	rechts	List3	links.bmp	1	1	228434	1	505	228939
RespPr_MoveS2_360	23	63	rechts	weiblich	52	3	unrel	links	List3	rechts.bmp	1	3	230740	3	367	231107
RespPr_MoveS2_360	23	63	rechts	weiblich	53	1	rel	links	List3	links.bmp	1	1	232899	1	448	233347
RespPr_MoveS2_360	23	63	rechts	weiblich	54	3	unrel	links	List3	rechts.bmp	1	3	235125	3	447	235572
RespPr_MoveS2_360	23	63	rechts	weiblich	55	3	unrel	links	List3	rechts.bmp	1	3	237351	3	493	237844
RespPr_MoveS2_360	23	63	rechts	weiblich	56	3	neuInnen	neutralInnen	List3	rechts.bmp	1	3	239644	3	464	240108
RespPr_MoveS2_360	23	63	rechts	weiblich	57	1	unrel	rechts	List3	links.bmp	1	1	241909	1	415	242324
RespPr_MoveS2_360	23	63	rechts	weiblich	58	1	rel	links	List3	links.bmp	1	1	244122	1	538	244660
RespPr_MoveS2_360	23	63	rechts	weiblich	59	1	neuInnen	neutralInnen	List3	links.bmp	1	1	246455	1	437	246892
RespPr_MoveS2_360	23	63	rechts	weiblich	60	1	unrel	rechts	List3	links.bmp	1	1	248694	1	478	249172
RespPr_MoveS2_360	23	63	rechts	weiblich	61	3	neuInnen	neutralInnen	List3	rechts.bmp	1	3	250973	3	591	251564
RespPr_MoveS2_360	23	63	rechts	weiblich	62	1	neuAussen	neutralAussen	List3	links.bmp	1	1	253359	1	444	253803
RespPr_MoveS2_360	23	63	rechts	weiblich	63	3	neuAussen	neutralAussen	List3	rechts.bmp	1	3	255598	3	462	256060
RespPr_MoveS2_360	23	63	rechts	weiblich	64	3	unrel	links	List3	rechts.bmp	1	3	257851	3	536	258387
RespPr_MoveS2_360	23	63	rechts	weiblich	65	3	rel	rechts	List3	rechts.bmp	1	3	260183	3	500	260683
RespPr_MoveS2_360	23	63	rechts	weiblich	66	1	neuAussen	neutralAussen	List3	links.bmp	1	1	262476	1	359	262835
RespPr_MoveS2_360	23	63	rechts	weiblich	67	3	rel	rechts	List3	rechts.bmp	1	3	264622	3	389	265011
RespPr_MoveS2_360	23	63	rechts	weiblich	68	1	neuInnen	neutralInnen	List3	links.bmp	1	1	266808	1	460	267268
RespPr_MoveS2_360	23	63	rechts	weiblich	69	1	rel	links	List3	links.bmp	1	1	269060	1	591	269651
RespPr_MoveS2_360	23	63	rechts	weiblich	70	1	neuInnen	neutralInnen	List3	links.bmp	1	1	271433	1	483	271916
RespPr_MoveS2_360	23	63	rechts	weiblich	71	3	rel	rechts	List3	rechts.bmp	1	3	273699	3	433	274132
RespPr_MoveS2_360	23	63	rechts	weiblich	72	3	rel	rechts	List3	rechts.bmp	1	3	275925	3	471	276396
RespPr_MoveS2_360	23	63	rechts	weiblich	73	1	unrel	rechts	List3	links.bmp	1	1	278191	1	340	278531
RespPr_MoveS2_360	23	63	rechts	weiblich	74	3	rel	rechts	List3	rechts.bmp	1	3	280323	3	592	280915
RespPr_MoveS2_360	23	63	rechts	weiblich	75	3	neuAussen	neutralAussen	List3	rechts.bmp	1	3	282696	3	412	283108
RespPr_MoveS2_360	23	63	rechts	weiblich	76	1	unrel	rechts	List3	links.bmp	1	1	284909	1	374	285283
RespPr_MoveS2_360	23	63	rechts	weiblich	77	3	neuInnen	neutralInnen	List3	rechts.bmp	1	3	287081	3	419	287500
RespPr_MoveS2_360	23	63	rechts	weiblich	78	3	neuAussen	neutralAussen	List3	rechts.bmp	1	3	289294	3	462	289756
RespPr_MoveS2_360	23	63	rechts	weiblich	79	3	rel	rechts	List3	rechts.bmp	1	3	291533	3	470	292003
RespPr_MoveS2_360	23	63	rechts	weiblich	80	1	rel	links	List3	links.bmp	1	1	293799	1	468	294267
RespPr_MoveS2_360	23	63	rechts	weiblich	81	3	unrel	links	List3	rechts.bmp	1	3	296065	3	475	296540
RespPr_MoveS2_360	23	63	rechts	weiblich	82	1	unrel	rechts	List3	links.bmp	1	1	298331	1	384	298715
RespPr_MoveS2_360	23	63	rechts	weiblich	83	1	rel	links	List3	links.bmp	1	1	300517	1	566	301083
RespPr_MoveS2_360	23	63	rechts	weiblich	84	3	unrel	links	List3	rechts.bmp	1	3	302876	3	415	303291
RespPr_MoveS2_360	23	63	rechts	weiblich	85	3	neuAussen	neutralAussen	List4	rechts.bmp	1	3	310140	3	471	310611
RespPr_MoveS2_360	23	63	rechts	weiblich	86	1	unrel	rechts	List4	links.bmp	1	1	312406	1	414	312820
RespPr_MoveS2_360	23	63	rechts	weiblich	87	3	rel	rechts	List4	rechts.bmp	1	3	314619	3	368	314987
RespPr_MoveS2_360	23	63	rechts	weiblich	88	1	unrel	rechts	List4	links.bmp	1	1	316778	1	433	317211
RespPr_MoveS2_360	23	63	rechts	weiblich	89	3	neuInnen	neutralInnen	List4	rechts.bmp	1	3	319004	3	319	319323
RespPr_MoveS2_360	23	63	rechts	weiblich	90	1	unrel	rechts	List4	links.bmp	1	1	321110	1	461	321571
RespPr_MoveS2_360	23	63	rechts	weiblich	91	3	rel	rechts	List4	rechts.bmp	1	3	323363	3	497	323860
RespPr_MoveS2_360	23	63	rechts	weiblich	92	1	rel	links	List4	links.bmp	1	1	325655	1	340	325995
RespPr_MoveS2_360	23	63	rechts	weiblich	93	3	unrel	links	List4	rechts.bmp	1	3	327788	3	472	328260
RespPr_MoveS2_360	23	63	rechts	weiblich	94	1	rel	links	List4	links.bmp	1	1	330054	1	437	330491
RespPr_MoveS2_360	23	63	rechts	weiblich	95	3	neuAussen	neutralAussen	List4	rechts.bmp	1	3	332293	3	366	332659
RespPr_MoveS2_360	23	63	rechts	weiblich	96	3	rel	rechts	List4	rechts.bmp	1	3	334452	3	592	335044
RespPr_MoveS2_360	23	63	rechts	weiblich	97	1	rel	links	List4	links.bmp	1	1	336838	1	438	337276
RespPr_MoveS2_360	23	63	rechts	weiblich	98	3	unrel	links	List4	rechts.bmp	1	3	339064	3	371	339435
RespPr_MoveS2_360	23	63	rechts	weiblich	99	1	unrel	rechts	List4	links.bmp	1	1	341237	1	535	341772
RespPr_MoveS2_360	23	63	rechts	weiblich	100	1	unrel	rechts	List4	links.bmp	1	1	343569	1	579	344148
RespPr_MoveS2_360	23	63	rechts	weiblich	101	3	unrel	links	List4	rechts.bmp	1	3	345942	3	382	346324
RespPr_MoveS2_360	23	63	rechts	weiblich	102	3	neuAussen	neutralAussen	List4	rechts.bmp	1	3	348101	3	575	348676
RespPr_MoveS2_360	23	63	rechts	weiblich	103	3	rel	rechts	List4	rechts.bmp	1	3	350474	3	626	351100
RespPr_MoveS2_360	23	63	rechts	weiblich	104	3	neuInnen	neutralInnen	List4	rechts.bmp	1	3	352899	3	489	353388
RespPr_MoveS2_360	23	63	rechts	weiblich	105	3	rel	rechts	List4	rechts.bmp	1	3	355179	3	456	355635
RespPr_MoveS2_360	23	63	rechts	weiblich	106	1	neuInnen	neutralInnen	List4	links.bmp	1	1	357418	1	473	357891
RespPr_MoveS2_360	23	63	rechts	weiblich	107	3	unrel	links	List4	rechts.bmp	1	3	359684	3	383	360067
RespPr_MoveS2_360	23	63	rechts	weiblich	108	1	neuAussen	neutralAussen	List4	links.bmp	1	1	361870	1	397	362267
RespPr_MoveS2_360	23	63	rechts	weiblich	109	1	neuInnen	neutralInnen	List4	links.bmp	1	1	364069	1	583	364652
RespPr_MoveS2_360	23	63	rechts	weiblich	110	3	rel	rechts	List4	rechts.bmp	1	3	366442	3	481	366923
RespPr_MoveS2_360	23	63	rechts	weiblich	111	1	rel	links	List4	links.bmp	1	1	368721	1	475	369196
RespPr_MoveS2_360	23	63	rechts	weiblich	112	3	unrel	links	List4	rechts.bmp	1	3	370987	3	384	371371
RespPr_MoveS2_360	23	63	rechts	weiblich	113	1	unrel	rechts	List4	links.bmp	1	1	373173	1	407	373580
RespPr_MoveS2_360	23	63	rechts	weiblich	114	1	neuInnen	neutralInnen	List4	links.bmp	1	1	375372	1	839	376211
RespPr_MoveS2_360	23	63	rechts	weiblich	115	1	neuAussen	neutralAussen	List4	links.bmp	1	1	378011	1	473	378484
RespPr_MoveS2_360	23	63	rechts	weiblich	116	1	rel	links	List4	links.bmp	1	1	380277	1	471	380748
RespPr_MoveS2_360	23	63	rechts	weiblich	117	3	neuInnen	neutralInnen	List4	rechts.bmp	1	3	382543	3	628	383171
RespPr_MoveS2_360	23	63	rechts	weiblich	118	3	unrel	links	List4	rechts.bmp	1	3	384969	3	499	385468
RespPr_MoveS2_360	23	63	rechts	weiblich	119	1	rel	links	List4	links.bmp	1	1	387248	1	452	387700
RespPr_MoveS2_360	23	63	rechts	weiblich	120	1	neuAussen	neutralAussen	List4	links.bmp	1	1	389501	1	455	389956
RespPr_MoveS2_360	23	63	rechts	weiblich	121	3	unrel	links	List5	rechts.bmp	1	3	441337	3	915	442252
RespPr_MoveS2_360	23	63	rechts	weiblich	122	3	neuAussen	neutralAussen	List5	rechts.bmp	1	3	444043	3	472	444515
RespPr_MoveS2_360	23	63	rechts	weiblich	123	1	neuInnen	neutralInnen	List5	links.bmp	1	1	446309	1	510	446819
RespPr_MoveS2_360	23	63	rechts	weiblich	124	1	unrel	rechts	List5	links.bmp	1	1	448614	1	493	449107
RespPr_MoveS2_360	23	63	rechts	weiblich	125	1	neuInnen	neutralInnen	List5	links.bmp	1	1	450907	1	457	451364
RespPr_MoveS2_360	23	63	rechts	weiblich	126	3	neuInnen	neutralInnen	List5	rechts.bmp	1	3	453160	3	556	453716
RespPr_MoveS2_360	23	63	rechts	weiblich	127	1	neuInnen	neutralInnen	List5	links.bmp	1	1	455505	1	570	456075
RespPr_MoveS2_360	23	63	rechts	weiblich	128	1	unrel	rechts	List5	links.bmp	1	1	457865	1	490	458355
RespPr_MoveS2_360	23	63	rechts	weiblich	129	3	neuAussen	neutralAussen	List5	rechts.bmp	1	3	460144	3	483	460627
RespPr_MoveS2_360	23	63	rechts	weiblich	130	3	rel	rechts	List5	rechts.bmp	1	3	462423	3	548	462971
RespPr_MoveS2_360	23	63	rechts	weiblich	131	1	rel	links	List5	links.bmp	1	1	464769	1	435	465204
RespPr_MoveS2_360	23	63	rechts	weiblich	132	3	neuAussen	neutralAussen	List5	rechts.bmp	1	3	466995	3	408	467403
RespPr_MoveS2_360	23	63	rechts	weiblich	133	3	rel	rechts	List5	rechts.bmp	1	3	469181	3	606	469787
RespPr_MoveS2_360	23	63	rechts	weiblich	134	3	rel	rechts	List5	rechts.bmp	1	3	471580	3	455	472035
RespPr_MoveS2_360	23	63	rechts	weiblich	135	3	rel	rechts	List5	rechts.bmp	1	3	473833	3	474	474307
RespPr_MoveS2_360	23	63	rechts	weiblich	136	1	unrel	rechts	List5	links.bmp	1	1	476099	1	425	476524
RespPr_MoveS2_360	23	63	rechts	weiblich	137	3	unrel	links	List5	rechts.bmp	1	3	478325	3	598	478923
RespPr_MoveS2_360	23	63	rechts	weiblich	138	3	rel	rechts	List5	rechts.bmp	1	3	480724	3	567	481291
RespPr_MoveS2_360	23	63	rechts	weiblich	139	3	unrel	links	List5	rechts.bmp	1	3	483083	3	657	483740
RespPr_MoveS2_360	23	63	rechts	weiblich	140	1	rel	links	List5	links.bmp	1	1	485536	1	507	486043
RespPr_MoveS2_360	23	63	rechts	weiblich	141	1	neuAussen	neutralAussen	List5	links.bmp	1	1	487841	1	595	488436
RespPr_MoveS2_360	23	63	rechts	weiblich	142	3	neuInnen	neutralInnen	List5	rechts.bmp	1	3	490214	3	638	490852
RespPr_MoveS2_360	23	63	rechts	weiblich	143	1	rel	links	List5	links.bmp	1	1	492653	1	839	493492
RespPr_MoveS2_360	23	63	rechts	weiblich	144	3	unrel	links	List5	rechts.bmp	1	3	495279	3	612	495891
RespPr_MoveS2_360	23	63	rechts	weiblich	145	3	rel	rechts	List5	rechts.bmp	1	3	497692	3	632	498324
RespPr_MoveS2_360	23	63	rechts	weiblich	146	3	unrel	links	List5	rechts.bmp	1	3	500117	3	615	500732
RespPr_MoveS2_360	23	63	rechts	weiblich	147	1	unrel	rechts	List5	links.bmp	1	1	502530	1	497	503027
RespPr_MoveS2_360	23	63	rechts	weiblich	148	1	unrel	rechts	List5	links.bmp	1	1	504823	1	492	505315
RespPr_MoveS2_360	23	63	rechts	weiblich	149	3	unrel	links	List5	rechts.bmp	1	3	507115	3	481	507596
RespPr_MoveS2_360	23	63	rechts	weiblich	150	1	neuAussen	neutralAussen	List5	links.bmp	1	1	509381	1	510	509891
RespPr_MoveS2_360	23	63	rechts	weiblich	151	1	unrel	rechts	List5	links.bmp	1	1	511687	1	460	512147
RespPr_MoveS2_360	23	63	rechts	weiblich	152	1	rel	links	List5	links.bmp	1	1	513939	1	601	514540
RespPr_MoveS2_360	23	63	rechts	weiblich	153	1	rel	links	List5	links.bmp	1	1	516339	1	441	516780
RespPr_MoveS2_360	23	63	rechts	weiblich	154	3	neuInnen	neutralInnen	List5	rechts.bmp	1	3	518578	3	514	519092
RespPr_MoveS2_360	23	63	rechts	weiblich	155	1	rel	links	List5	links.bmp	1	1	520884	1	504	521388
RespPr_MoveS2_360	23	63	rechts	weiblich	156	1	neuAussen	neutralAussen	List5	links.bmp	1	1	523190	1	493	523683
RespPr_MoveS2_360	24	72	rechts	weiblich	1	1	neuInnen	neutralInnen	List1	links.bmp	1	1	121783	1	1005	122788
RespPr_MoveS2_360	24	72	rechts	weiblich	2	3	rel	rechts	List1	rechts.bmp	1	3	124582	3	398	124980
RespPr_MoveS2_360	24	72	rechts	weiblich	3	1	rel	links	List1	links.bmp	1	1	126781	1	431	127212
RespPr_MoveS2_360	24	72	rechts	weiblich	4	3	unrel	links	List1	rechts.bmp	1	3	129007	3	413	129420
RespPr_MoveS2_360	24	72	rechts	weiblich	5	3	neuAussen	neutralAussen	List1	rechts.bmp	1	3	131220	3	784	132004
RespPr_MoveS2_360	24	72	rechts	weiblich	6	3	rel	rechts	List1	rechts.bmp	1	3	133805	3	487	134292
RespPr_MoveS2_360	24	72	rechts	weiblich	7	1	rel	links	List1	links.bmp	1	1	136085	1	543	136628
RespPr_MoveS2_360	24	72	rechts	weiblich	8	3	unrel	links	List1	rechts.bmp	1	3	138431	3	478	138909
RespPr_MoveS2_360	24	72	rechts	weiblich	9	1	unrel	rechts	List1	links.bmp	1	1	140710	1	503	141213
RespPr_MoveS2_360	24	72	rechts	weiblich	10	1	neuAussen	neutralAussen	List1	links.bmp	1	1	143002	1	635	143637
RespPr_MoveS2_360	24	72	rechts	weiblich	11	1	unrel	rechts	List1	links.bmp	1	1	145415	1	525	145940
RespPr_MoveS2_360	24	72	rechts	weiblich	12	3	neuInnen	neutralInnen	List1	rechts.bmp	1	3	147734	3	471	148205
RespPr_MoveS2_360	24	72	rechts	weiblich	13	1	unrel	rechts	List2	links.bmp	1	1	204222	1	486	204708
RespPr_MoveS2_360	24	72	rechts	weiblich	14	1	unrel	rechts	List2	links.bmp	1	1	206501	1	400	206901
RespPr_MoveS2_360	24	72	rechts	weiblich	15	1	rel	links	List2	links.bmp	1	1	208701	1	503	209204
RespPr_MoveS2_360	24	72	rechts	weiblich	16	3	unrel	links	List2	rechts.bmp	1	3	211007	3	430	211437
RespPr_MoveS2_360	24	72	rechts	weiblich	17	3	unrel	links	List2	rechts.bmp	1	3	213233	3	403	213636
RespPr_MoveS2_360	24	72	rechts	weiblich	18	3	rel	rechts	List2	rechts.bmp	1	3	215432	3	532	215964
RespPr_MoveS2_360	24	72	rechts	weiblich	19	1	unrel	rechts	List2	links.bmp	1	1	217751	1	446	218197
RespPr_MoveS2_360	24	72	rechts	weiblich	20	1	unrel	rechts	List2	links.bmp	1	1	219977	1	484	220461
RespPr_MoveS2_360	24	72	rechts	weiblich	21	1	rel	links	List2	links.bmp	1	1	222256	1	501	222757
RespPr_MoveS2_360	24	72	rechts	weiblich	22	3	neuInnen	neutralInnen	List2	rechts.bmp	1	3	224549	3	471	225020
RespPr_MoveS2_360	24	72	rechts	weiblich	23	1	neuAussen	neutralAussen	List2	links.bmp	1	1	226815	1	612	227427
RespPr_MoveS2_360	24	72	rechts	weiblich	24	1	neuAussen	neutralAussen	List2	links.bmp	1	1	229227	1	450	229677
RespPr_MoveS2_360	24	72	rechts	weiblich	25	3	neuInnen	neutralInnen	List2	rechts.bmp	1	3	231466	3	618	232084
RespPr_MoveS2_360	24	72	rechts	weiblich	26	1	neuInnen	neutralInnen	List2	links.bmp	1	1	233879	1	478	234357
RespPr_MoveS2_360	24	72	rechts	weiblich	27	1	unrel	rechts	List2	links.bmp	1	1	236145	1	443	236588
RespPr_MoveS2_360	24	72	rechts	weiblich	28	1	neuInnen	neutralInnen	List2	links.bmp	1	1	238384	1	565	238949
RespPr_MoveS2_360	24	72	rechts	weiblich	29	3	unrel	links	List2	rechts.bmp	1	3	240743	3	734	241477
RespPr_MoveS2_360	24	72	rechts	weiblich	30	1	unrel	rechts	List2	links.bmp	1	1	243276	1	688	243964
RespPr_MoveS2_360	24	72	rechts	weiblich	31	1	rel	links	List2	links.bmp	1	1	245755	1	482	246237
RespPr_MoveS2_360	24	72	rechts	weiblich	32	3	rel	rechts	List2	rechts.bmp	1	3	248021	3	519	248540
RespPr_MoveS2_360	24	72	rechts	weiblich	33	1	neuInnen	neutralInnen	List2	links.bmp	1	1	250340	1	592	250932
RespPr_MoveS2_360	24	72	rechts	weiblich	34	3	neuAussen	neutralAussen	List2	rechts.bmp	1	3	252726	3	574	253300
RespPr_MoveS2_360	24	72	rechts	weiblich	35	3	unrel	links	List2	rechts.bmp	1	3	255099	3	578	255677
RespPr_MoveS2_360	24	72	rechts	weiblich	36	1	neuAussen	neutralAussen	List2	links.bmp	1	1	257471	1	517	257988
RespPr_MoveS2_360	24	72	rechts	weiblich	37	3	neuInnen	neutralInnen	List2	rechts.bmp	1	3	259790	3	503	260293
RespPr_MoveS2_360	24	72	rechts	weiblich	38	3	neuAussen	neutralAussen	List2	rechts.bmp	1	3	262083	3	474	262557
RespPr_MoveS2_360	24	72	rechts	weiblich	39	3	rel	rechts	List2	rechts.bmp	1	3	264349	3	480	264829
RespPr_MoveS2_360	24	72	rechts	weiblich	40	3	unrel	links	List2	rechts.bmp	1	3	266628	3	528	267156
RespPr_MoveS2_360	24	72	rechts	weiblich	41	3	neuAussen	neutralAussen	List2	rechts.bmp	1	3	268947	3	434	269381
RespPr_MoveS2_360	24	72	rechts	weiblich	42	3	unrel	links	List2	rechts.bmp	1	3	271160	3	436	271596
RespPr_MoveS2_360	24	72	rechts	weiblich	43	1	rel	links	List2	links.bmp	1	1	273386	1	530	273916
RespPr_MoveS2_360	24	72	rechts	weiblich	44	1	rel	links	List2	links.bmp	1	1	275705	1	435	276140
RespPr_MoveS2_360	24	72	rechts	weiblich	45	3	rel	rechts	List2	rechts.bmp	1	3	277931	3	681	278612
RespPr_MoveS2_360	24	72	rechts	weiblich	46	3	rel	rechts	List2	rechts.bmp	1	3	280397	3	392	280789
RespPr_MoveS2_360	24	72	rechts	weiblich	47	3	rel	rechts	List2	rechts.bmp	1	3	282583	3	397	282980
RespPr_MoveS2_360	24	72	rechts	weiblich	48	1	rel	links	List2	links.bmp	1	1	284782	1	542	285324
RespPr_MoveS2_360	24	72	rechts	weiblich	49	3	neuAussen	neutralAussen	List3	rechts.bmp	1	3	313706	3	3346	317052
RespPr_MoveS2_360	24	72	rechts	weiblich	50	1	unrel	rechts	List3	links.bmp	1	1	318851	1	441	319292
RespPr_MoveS2_360	24	72	rechts	weiblich	51	3	rel	rechts	List3	rechts.bmp	1	3	321090	3	531	321621
RespPr_MoveS2_360	24	72	rechts	weiblich	52	1	rel	links	List3	links.bmp	1	1	323423	1	517	323940
RespPr_MoveS2_360	24	72	rechts	weiblich	53	1	unrel	rechts	List3	links.bmp	1	1	325742	1	438	326180
RespPr_MoveS2_360	24	72	rechts	weiblich	54	1	neuAussen	neutralAussen	List3	links.bmp	1	1	327981	1	472	328453
RespPr_MoveS2_360	24	72	rechts	weiblich	55	3	neuAussen	neutralAussen	List3	rechts.bmp	1	3	330247	3	582	330829
RespPr_MoveS2_360	24	72	rechts	weiblich	56	3	rel	rechts	List3	rechts.bmp	1	3	332620	3	504	333124
RespPr_MoveS2_360	24	72	rechts	weiblich	57	3	neuInnen	neutralInnen	List3	rechts.bmp	1	3	334926	3	390	335316
RespPr_MoveS2_360	24	72	rechts	weiblich	58	3	unrel	links	List3	rechts.bmp	1	3	337112	3	436	337548
RespPr_MoveS2_360	24	72	rechts	weiblich	59	3	rel	rechts	List3	rechts.bmp	1	3	339337	3	419	339756
RespPr_MoveS2_360	24	72	rechts	weiblich	60	1	unrel	rechts	List3	links.bmp	1	1	341550	1	381	341931
RespPr_MoveS2_360	24	72	rechts	weiblich	61	1	unrel	rechts	List3	links.bmp	1	1	343723	1	385	344108
RespPr_MoveS2_360	24	72	rechts	weiblich	62	3	unrel	links	List3	rechts.bmp	1	3	345909	3	368	346277
RespPr_MoveS2_360	24	72	rechts	weiblich	63	1	neuAussen	neutralAussen	List3	links.bmp	1	1	348068	1	504	348572
RespPr_MoveS2_360	24	72	rechts	weiblich	64	3	unrel	links	List3	rechts.bmp	1	3	350374	3	390	350764
RespPr_MoveS2_360	24	72	rechts	weiblich	65	1	rel	links	List3	links.bmp	1	1	352560	1	397	352957
RespPr_MoveS2_360	24	72	rechts	weiblich	66	1	neuInnen	neutralInnen	List3	links.bmp	1	1	354759	1	453	355212
RespPr_MoveS2_360	24	72	rechts	weiblich	67	3	unrel	links	List3	rechts.bmp	1	3	357012	3	392	357404
RespPr_MoveS2_360	24	72	rechts	weiblich	68	1	neuInnen	neutralInnen	List3	links.bmp	1	1	359198	1	550	359748
RespPr_MoveS2_360	24	72	rechts	weiblich	69	1	rel	links	List3	links.bmp	1	1	361543	1	421	361964
RespPr_MoveS2_360	24	72	rechts	weiblich	70	3	rel	rechts	List3	rechts.bmp	0	3	363756	1	545	364301
RespPr_MoveS2_360	24	72	rechts	weiblich	71	1	unrel	rechts	List3	links.bmp	1	1	366102	1	807	366909
RespPr_MoveS2_360	24	72	rechts	weiblich	72	3	neuAussen	neutralAussen	List3	rechts.bmp	1	3	368701	3	751	369452
RespPr_MoveS2_360	24	72	rechts	weiblich	73	1	rel	links	List3	links.bmp	1	1	371247	1	581	371828
RespPr_MoveS2_360	24	72	rechts	weiblich	74	3	neuInnen	neutralInnen	List3	rechts.bmp	1	3	373619	3	753	374372
RespPr_MoveS2_360	24	72	rechts	weiblich	75	3	rel	rechts	List3	rechts.bmp	1	3	376152	3	476	376628
RespPr_MoveS2_360	24	72	rechts	weiblich	76	1	neuInnen	neutralInnen	List3	links.bmp	1	1	378418	1	618	379036
RespPr_MoveS2_360	24	72	rechts	weiblich	77	3	unrel	links	List3	rechts.bmp	1	3	380830	3	447	381277
RespPr_MoveS2_360	24	72	rechts	weiblich	78	1	unrel	rechts	List3	links.bmp	1	1	383070	1	558	383628
RespPr_MoveS2_360	24	72	rechts	weiblich	79	1	rel	links	List3	links.bmp	1	1	385429	1	583	386012
RespPr_MoveS2_360	24	72	rechts	weiblich	80	1	neuAussen	neutralAussen	List3	links.bmp	1	1	387815	1	525	388340
RespPr_MoveS2_360	24	72	rechts	weiblich	81	1	rel	links	List3	links.bmp	1	1	390134	1	527	390661
RespPr_MoveS2_360	24	72	rechts	weiblich	82	3	unrel	links	List3	rechts.bmp	1	3	392453	3	688	393141
RespPr_MoveS2_360	24	72	rechts	weiblich	83	3	rel	rechts	List3	rechts.bmp	1	3	394932	3	521	395453
RespPr_MoveS2_360	24	72	rechts	weiblich	84	3	neuInnen	neutralInnen	List3	rechts.bmp	1	3	397252	3	504	397756
RespPr_MoveS2_360	24	72	rechts	weiblich	85	1	rel	links	List4	links.bmp	1	1	418218	1	538	418756
RespPr_MoveS2_360	24	72	rechts	weiblich	86	3	unrel	links	List4	rechts.bmp	1	3	420551	3	486	421037
RespPr_MoveS2_360	24	72	rechts	weiblich	87	1	neuInnen	neutralInnen	List4	links.bmp	1	1	422830	1	622	423452
RespPr_MoveS2_360	24	72	rechts	weiblich	88	3	neuAussen	neutralAussen	List4	rechts.bmp	1	3	425242	3	603	425845
RespPr_MoveS2_360	24	72	rechts	weiblich	89	1	unrel	rechts	List4	links.bmp	1	1	427642	1	475	428117
RespPr_MoveS2_360	24	72	rechts	weiblich	90	1	neuAussen	neutralAussen	List4	links.bmp	1	1	429908	1	473	430381
RespPr_MoveS2_360	24	72	rechts	weiblich	91	3	unrel	links	List4	rechts.bmp	1	3	432173	3	400	432573
RespPr_MoveS2_360	24	72	rechts	weiblich	92	3	rel	rechts	List4	rechts.bmp	1	3	434373	3	567	434940
RespPr_MoveS2_360	24	72	rechts	weiblich	93	1	unrel	rechts	List4	links.bmp	1	1	436732	1	440	437172
RespPr_MoveS2_360	24	72	rechts	weiblich	94	3	neuAussen	neutralAussen	List4	rechts.bmp	1	3	438971	3	514	439485
RespPr_MoveS2_360	24	72	rechts	weiblich	95	1	unrel	rechts	List4	links.bmp	1	1	441277	1	472	441749
RespPr_MoveS2_360	24	72	rechts	weiblich	96	3	unrel	links	List4	rechts.bmp	1	3	443543	3	485	444028
RespPr_MoveS2_360	24	72	rechts	weiblich	97	3	unrel	links	List4	rechts.bmp	1	3	445809	3	572	446381
RespPr_MoveS2_360	24	72	rechts	weiblich	98	3	unrel	links	List4	rechts.bmp	1	3	448181	3	423	448604
RespPr_MoveS2_360	24	72	rechts	weiblich	99	1	neuInnen	neutralInnen	List4	links.bmp	1	1	450394	1	498	450892
RespPr_MoveS2_360	24	72	rechts	weiblich	100	3	neuAussen	neutralAussen	List4	rechts.bmp	1	3	452687	3	734	453421
RespPr_MoveS2_360	24	72	rechts	weiblich	101	1	unrel	rechts	List4	links.bmp	1	1	455219	1	609	455828
RespPr_MoveS2_360	24	72	rechts	weiblich	102	1	neuInnen	neutralInnen	List4	links.bmp	1	1	457605	1	544	458149
RespPr_MoveS2_360	24	72	rechts	weiblich	103	1	rel	links	List4	links.bmp	1	1	459951	1	469	460420
RespPr_MoveS2_360	24	72	rechts	weiblich	104	1	rel	links	List4	links.bmp	1	1	462217	1	572	462789
RespPr_MoveS2_360	24	72	rechts	weiblich	105	3	unrel	links	List4	rechts.bmp	1	3	464589	3	582	465171
RespPr_MoveS2_360	24	72	rechts	weiblich	106	1	unrel	rechts	List4	links.bmp	1	1	466962	1	595	467557
RespPr_MoveS2_360	24	72	rechts	weiblich	107	3	rel	rechts	List4	rechts.bmp	1	3	469348	3	617	469965
RespPr_MoveS2_360	24	72	rechts	weiblich	108	3	neuInnen	neutralInnen	List4	rechts.bmp	1	3	471747	3	545	472292
RespPr_MoveS2_360	24	72	rechts	weiblich	109	1	rel	links	List4	links.bmp	1	1	474093	1	615	474708
RespPr_MoveS2_360	24	72	rechts	weiblich	110	3	rel	rechts	List4	rechts.bmp	1	3	476505	3	523	477028
RespPr_MoveS2_360	24	72	rechts	weiblich	111	3	rel	rechts	List4	rechts.bmp	1	3	478825	3	420	479245
RespPr_MoveS2_360	24	72	rechts	weiblich	112	1	unrel	rechts	List4	links.bmp	1	1	481024	1	444	481468
RespPr_MoveS2_360	24	72	rechts	weiblich	113	1	rel	links	List4	links.bmp	1	1	483263	1	606	483869
RespPr_MoveS2_360	24	72	rechts	weiblich	114	1	neuAussen	neutralAussen	List4	links.bmp	1	1	485662	1	526	486188
RespPr_MoveS2_360	24	72	rechts	weiblich	115	1	rel	links	List4	links.bmp	1	1	487982	1	551	488533
RespPr_MoveS2_360	24	72	rechts	weiblich	116	3	neuInnen	neutralInnen	List4	rechts.bmp	1	3	490328	3	652	490980
RespPr_MoveS2_360	24	72	rechts	weiblich	117	3	rel	rechts	List4	rechts.bmp	1	3	492780	3	521	493301
RespPr_MoveS2_360	24	72	rechts	weiblich	118	3	rel	rechts	List4	rechts.bmp	1	3	495086	3	471	495557
RespPr_MoveS2_360	24	72	rechts	weiblich	119	3	neuInnen	neutralInnen	List4	rechts.bmp	1	3	497352	3	516	497868
RespPr_MoveS2_360	24	72	rechts	weiblich	120	1	neuAussen	neutralAussen	List4	links.bmp	1	1	499658	1	531	500189
RespPr_MoveS2_360	24	72	rechts	weiblich	121	1	rel	links	List5	links.bmp	1	1	514866	1	522	515388
RespPr_MoveS2_360	24	72	rechts	weiblich	122	3	neuInnen	neutralInnen	List5	rechts.bmp	1	3	517172	3	457	517629
RespPr_MoveS2_360	24	72	rechts	weiblich	123	1	unrel	rechts	List5	links.bmp	1	1	519425	1	539	519964
RespPr_MoveS2_360	24	72	rechts	weiblich	124	3	rel	rechts	List5	rechts.bmp	1	3	521757	3	431	522188
RespPr_MoveS2_360	24	72	rechts	weiblich	125	1	unrel	rechts	List5	links.bmp	1	1	523983	1	502	524485
RespPr_MoveS2_360	24	72	rechts	weiblich	126	3	unrel	links	List5	rechts.bmp	1	3	526276	3	464	526740
RespPr_MoveS2_360	24	72	rechts	weiblich	127	3	unrel	links	List5	rechts.bmp	1	3	528542	3	527	529069
RespPr_MoveS2_360	24	72	rechts	weiblich	128	3	unrel	links	List5	rechts.bmp	1	3	530861	3	567	531428
RespPr_MoveS2_360	24	72	rechts	weiblich	129	3	neuInnen	neutralInnen	List5	rechts.bmp	1	3	533220	3	473	533693
RespPr_MoveS2_360	24	72	rechts	weiblich	130	3	unrel	links	List5	rechts.bmp	1	3	535486	3	550	536036
RespPr_MoveS2_360	24	72	rechts	weiblich	131	3	rel	rechts	List5	rechts.bmp	1	3	537832	3	436	538268
RespPr_MoveS2_360	24	72	rechts	weiblich	132	1	rel	links	List5	links.bmp	1	1	540058	1	498	540556
RespPr_MoveS2_360	24	72	rechts	weiblich	133	1	neuAussen	neutralAussen	List5	links.bmp	1	1	542337	1	516	542853
RespPr_MoveS2_360	24	72	rechts	weiblich	134	1	unrel	rechts	List5	links.bmp	1	1	544643	1	585	545228
RespPr_MoveS2_360	24	72	rechts	weiblich	135	3	rel	rechts	List5	rechts.bmp	1	3	547029	3	583	547612
RespPr_MoveS2_360	24	72	rechts	weiblich	136	3	rel	rechts	List5	rechts.bmp	1	3	549388	3	513	549901
RespPr_MoveS2_360	24	72	rechts	weiblich	137	3	unrel	links	List5	rechts.bmp	1	3	551694	3	431	552125
RespPr_MoveS2_360	24	72	rechts	weiblich	138	1	unrel	rechts	List5	links.bmp	1	1	553920	1	628	554548
RespPr_MoveS2_360	24	72	rechts	weiblich	139	1	rel	links	List5	links.bmp	1	1	556346	1	578	556924
RespPr_MoveS2_360	24	72	rechts	weiblich	140	1	rel	links	List5	links.bmp	1	1	558705	1	579	559284
RespPr_MoveS2_360	24	72	rechts	weiblich	141	3	unrel	links	List5	rechts.bmp	1	3	561077	3	1288	562365
RespPr_MoveS2_360	24	72	rechts	weiblich	142	1	neuAussen	neutralAussen	List5	links.bmp	1	1	564156	1	576	564732
RespPr_MoveS2_360	24	72	rechts	weiblich	143	3	rel	rechts	List5	rechts.bmp	1	3	566529	3	459	566988
RespPr_MoveS2_360	24	72	rechts	weiblich	144	1	neuInnen	neutralInnen	List5	links.bmp	1	1	568782	1	638	569420
RespPr_MoveS2_360	24	72	rechts	weiblich	145	1	rel	links	List5	links.bmp	1	1	571221	1	552	571773
RespPr_MoveS2_360	24	72	rechts	weiblich	146	3	neuInnen	neutralInnen	List5	rechts.bmp	1	3	573567	3	533	574100
RespPr_MoveS2_360	24	72	rechts	weiblich	147	3	neuAussen	neutralAussen	List5	rechts.bmp	1	3	575899	3	465	576364
RespPr_MoveS2_360	24	72	rechts	weiblich	148	1	neuInnen	neutralInnen	List5	links.bmp	1	1	578165	1	544	578709
RespPr_MoveS2_360	24	72	rechts	weiblich	149	1	neuInnen	neutralInnen	List5	links.bmp	1	1	580511	1	733	581244
RespPr_MoveS2_360	24	72	rechts	weiblich	150	1	unrel	rechts	List5	links.bmp	1	1	583044	1	473	583517
RespPr_MoveS2_360	24	72	rechts	weiblich	151	1	rel	links	List5	links.bmp	1	1	585309	1	503	585812
RespPr_MoveS2_360	24	72	rechts	weiblich	152	3	neuAussen	neutralAussen	List5	rechts.bmp	1	3	587602	3	722	588324
RespPr_MoveS2_360	24	72	rechts	weiblich	153	3	rel	rechts	List5	rechts.bmp	1	3	590121	3	507	590628
RespPr_MoveS2_360	24	72	rechts	weiblich	154	1	unrel	rechts	List5	links.bmp	1	1	592427	1	465	592892
RespPr_MoveS2_360	24	72	rechts	weiblich	155	3	neuAussen	neutralAussen	List5	rechts.bmp	1	3	594693	3	631	595324
RespPr_MoveS2_360	24	72	rechts	weiblich	156	1	neuAussen	neutralAussen	List5	links.bmp	1	1	597119	1	637	597756
RespPr_MoveS2_360	25	75	rechts	weiblich	1	3	rel	rechts	List1	rechts.bmp	1	3	91190	3	759	91949
RespPr_MoveS2_360	25	75	rechts	weiblich	2	1	rel	links	List1	links.bmp	1	1	93749	1	488	94237
RespPr_MoveS2_360	25	75	rechts	weiblich	3	1	unrel	rechts	List1	links.bmp	1	1	96028	1	673	96701
RespPr_MoveS2_360	25	75	rechts	weiblich	4	1	unrel	rechts	List1	links.bmp	1	1	98494	1	415	98909
RespPr_MoveS2_360	25	75	rechts	weiblich	5	3	neuInnen	neutralInnen	List1	rechts.bmp	1	3	100707	3	426	101133
RespPr_MoveS2_360	25	75	rechts	weiblich	6	1	rel	links	List1	links.bmp	1	1	102932	1	433	103365
RespPr_MoveS2_360	25	75	rechts	weiblich	7	3	neuAussen	neutralAussen	List1	rechts.bmp	1	3	105158	3	455	105613
RespPr_MoveS2_360	25	75	rechts	weiblich	8	1	neuInnen	neutralInnen	List1	links.bmp	1	1	107411	1	466	107877
RespPr_MoveS2_360	25	75	rechts	weiblich	9	3	unrel	links	List1	rechts.bmp	1	3	109677	3	456	110133
RespPr_MoveS2_360	25	75	rechts	weiblich	10	1	neuAussen	neutralAussen	List1	links.bmp	1	1	111929	1	444	112373
RespPr_MoveS2_360	25	75	rechts	weiblich	11	3	rel	rechts	List1	rechts.bmp	1	3	114169	3	556	114725
RespPr_MoveS2_360	25	75	rechts	weiblich	12	3	unrel	links	List1	rechts.bmp	1	3	116515	3	554	117069
RespPr_MoveS2_360	25	75	rechts	weiblich	13	1	rel	links	List2	links.bmp	1	1	137241	1	948	138189
RespPr_MoveS2_360	25	75	rechts	weiblich	14	3	rel	rechts	List2	rechts.bmp	1	3	139987	3	394	140381
RespPr_MoveS2_360	25	75	rechts	weiblich	15	3	rel	rechts	List2	rechts.bmp	1	3	142173	3	496	142669
RespPr_MoveS2_360	25	75	rechts	weiblich	16	1	unrel	rechts	List2	links.bmp	1	1	144465	1	436	144901
RespPr_MoveS2_360	25	75	rechts	weiblich	17	1	unrel	rechts	List2	links.bmp	1	1	146678	1	415	147093
RespPr_MoveS2_360	25	75	rechts	weiblich	18	3	neuInnen	neutralInnen	List2	rechts.bmp	1	3	148891	3	370	149261
RespPr_MoveS2_360	25	75	rechts	weiblich	19	3	rel	rechts	List2	rechts.bmp	1	3	151063	3	502	151565
RespPr_MoveS2_360	25	75	rechts	weiblich	20	3	neuInnen	neutralInnen	List2	rechts.bmp	1	3	153356	3	514	153870
RespPr_MoveS2_360	25	75	rechts	weiblich	21	1	neuInnen	neutralInnen	List2	links.bmp	1	1	155662	1	415	156077
RespPr_MoveS2_360	25	75	rechts	weiblich	22	3	neuAussen	neutralAussen	List2	rechts.bmp	1	3	157861	3	384	158245
RespPr_MoveS2_360	25	75	rechts	weiblich	23	3	rel	rechts	List2	rechts.bmp	1	3	160047	3	518	160565
RespPr_MoveS2_360	25	75	rechts	weiblich	24	1	neuAussen	neutralAussen	List2	links.bmp	1	1	162366	1	752	163118
RespPr_MoveS2_360	25	75	rechts	weiblich	25	3	unrel	links	List2	rechts.bmp	1	3	164912	3	373	165285
RespPr_MoveS2_360	25	75	rechts	weiblich	26	3	neuInnen	neutralInnen	List2	rechts.bmp	1	3	167085	3	464	167549
RespPr_MoveS2_360	25	75	rechts	weiblich	27	1	rel	links	List2	links.bmp	1	1	169350	1	527	169877
RespPr_MoveS2_360	25	75	rechts	weiblich	28	1	rel	links	List2	links.bmp	1	1	171670	1	424	172094
RespPr_MoveS2_360	25	75	rechts	weiblich	29	1	rel	links	List2	links.bmp	1	1	173896	1	541	174437
RespPr_MoveS2_360	25	75	rechts	weiblich	30	3	unrel	links	List2	rechts.bmp	1	3	176228	3	377	176605
RespPr_MoveS2_360	25	75	rechts	weiblich	31	3	neuAussen	neutralAussen	List2	rechts.bmp	1	3	178401	3	461	178862
RespPr_MoveS2_360	25	75	rechts	weiblich	32	3	rel	rechts	List2	rechts.bmp	1	3	180653	3	456	181109
RespPr_MoveS2_360	25	75	rechts	weiblich	33	1	unrel	rechts	List2	links.bmp	1	1	182906	1	428	183334
RespPr_MoveS2_360	25	75	rechts	weiblich	34	3	unrel	links	List2	rechts.bmp	1	3	185132	3	466	185598
RespPr_MoveS2_360	25	75	rechts	weiblich	35	1	rel	links	List2	links.bmp	1	1	187398	1	767	188165
RespPr_MoveS2_360	25	75	rechts	weiblich	36	3	neuAussen	neutralAussen	List2	rechts.bmp	1	3	189957	3	448	190405
RespPr_MoveS2_360	25	75	rechts	weiblich	37	1	neuInnen	neutralInnen	List2	links.bmp	1	1	192183	1	582	192765
RespPr_MoveS2_360	25	75	rechts	weiblich	38	1	neuAussen	neutralAussen	List2	links.bmp	1	1	194555	1	602	195157
RespPr_MoveS2_360	25	75	rechts	weiblich	39	1	rel	links	List2	links.bmp	1	1	196955	1	570	197525
RespPr_MoveS2_360	25	75	rechts	weiblich	40	1	neuInnen	neutralInnen	List2	links.bmp	1	1	199327	1	438	199765
RespPr_MoveS2_360	25	75	rechts	weiblich	41	1	unrel	rechts	List2	links.bmp	1	1	201567	1	439	202006
RespPr_MoveS2_360	25	75	rechts	weiblich	42	3	unrel	links	List2	rechts.bmp	1	3	203806	3	352	204158
RespPr_MoveS2_360	25	75	rechts	weiblich	43	3	unrel	links	List2	rechts.bmp	1	3	205952	3	389	206341
RespPr_MoveS2_360	25	75	rechts	weiblich	44	1	neuAussen	neutralAussen	List2	links.bmp	1	1	208138	1	507	208645
RespPr_MoveS2_360	25	75	rechts	weiblich	45	3	rel	rechts	List2	rechts.bmp	1	3	210444	3	465	210909
RespPr_MoveS2_360	25	75	rechts	weiblich	46	1	unrel	rechts	List2	links.bmp	1	1	212709	1	440	213149
RespPr_MoveS2_360	25	75	rechts	weiblich	47	3	unrel	links	List2	rechts.bmp	1	3	214949	3	456	215405
RespPr_MoveS2_360	25	75	rechts	weiblich	48	1	unrel	rechts	List2	links.bmp	1	1	217188	1	521	217709
RespPr_MoveS2_360	25	75	rechts	weiblich	49	3	neuInnen	neutralInnen	List3	rechts.bmp	1	3	235195	3	498	235693
RespPr_MoveS2_360	25	75	rechts	weiblich	50	3	rel	rechts	List3	rechts.bmp	1	3	237488	3	477	237965
RespPr_MoveS2_360	25	75	rechts	weiblich	51	3	unrel	links	List3	rechts.bmp	1	3	239767	3	470	240237
RespPr_MoveS2_360	25	75	rechts	weiblich	52	1	unrel	rechts	List3	links.bmp	1	1	242033	1	452	242485
RespPr_MoveS2_360	25	75	rechts	weiblich	53	3	neuInnen	neutralInnen	List3	rechts.bmp	1	3	244286	3	503	244789
RespPr_MoveS2_360	25	75	rechts	weiblich	54	1	neuInnen	neutralInnen	List3	links.bmp	1	1	246592	1	517	247109
RespPr_MoveS2_360	25	75	rechts	weiblich	55	3	rel	rechts	List3	rechts.bmp	1	3	248911	3	350	249261
RespPr_MoveS2_360	25	75	rechts	weiblich	56	1	unrel	rechts	List3	links.bmp	1	1	251057	1	508	251565
RespPr_MoveS2_360	25	75	rechts	weiblich	57	3	unrel	links	List3	rechts.bmp	1	3	253363	3	442	253805
RespPr_MoveS2_360	25	75	rechts	weiblich	58	1	neuAussen	neutralAussen	List3	links.bmp	1	1	255602	1	516	256118
RespPr_MoveS2_360	25	75	rechts	weiblich	59	1	neuAussen	neutralAussen	List3	links.bmp	1	1	257908	1	489	258397
RespPr_MoveS2_360	25	75	rechts	weiblich	60	3	unrel	links	List3	rechts.bmp	1	3	260187	3	378	260565
RespPr_MoveS2_360	25	75	rechts	weiblich	61	1	neuInnen	neutralInnen	List3	links.bmp	1	1	262360	1	486	262846
RespPr_MoveS2_360	25	75	rechts	weiblich	62	3	rel	rechts	List3	rechts.bmp	1	3	264639	3	390	265029
RespPr_MoveS2_360	25	75	rechts	weiblich	63	3	rel	rechts	List3	rechts.bmp	1	3	266825	3	549	267374
RespPr_MoveS2_360	25	75	rechts	weiblich	64	3	neuAussen	neutralAussen	List3	rechts.bmp	1	3	269171	3	466	269637
RespPr_MoveS2_360	25	75	rechts	weiblich	65	3	unrel	links	List3	rechts.bmp	1	3	271437	3	497	271934
RespPr_MoveS2_360	25	75	rechts	weiblich	66	1	neuAussen	neutralAussen	List3	links.bmp	1	1	273716	1	513	274229
RespPr_MoveS2_360	25	75	rechts	weiblich	67	3	rel	rechts	List3	rechts.bmp	1	3	276022	3	471	276493
RespPr_MoveS2_360	25	75	rechts	weiblich	68	3	neuInnen	neutralInnen	List3	rechts.bmp	1	3	278288	3	445	278733
RespPr_MoveS2_360	25	75	rechts	weiblich	69	1	unrel	rechts	List3	links.bmp	1	1	280527	1	502	281029
RespPr_MoveS2_360	25	75	rechts	weiblich	70	3	unrel	links	List3	rechts.bmp	1	3	282820	3	393	283213
RespPr_MoveS2_360	25	75	rechts	weiblich	71	3	unrel	links	List3	rechts.bmp	1	3	285006	3	455	285461
RespPr_MoveS2_360	25	75	rechts	weiblich	72	1	unrel	rechts	List3	links.bmp	1	1	287258	1	459	287717
RespPr_MoveS2_360	25	75	rechts	weiblich	73	1	rel	links	List3	links.bmp	1	1	289511	1	455	289966
RespPr_MoveS2_360	25	75	rechts	weiblich	74	1	neuInnen	neutralInnen	List3	links.bmp	1	1	291750	1	511	292261
RespPr_MoveS2_360	25	75	rechts	weiblich	75	1	unrel	rechts	List3	links.bmp	1	1	294056	1	525	294581
RespPr_MoveS2_360	25	75	rechts	weiblich	76	1	rel	links	List3	links.bmp	1	1	296375	1	390	296765
RespPr_MoveS2_360	25	75	rechts	weiblich	77	1	rel	links	List3	links.bmp	1	1	298561	1	492	299053
RespPr_MoveS2_360	25	75	rechts	weiblich	78	3	rel	rechts	List3	rechts.bmp	1	3	300854	3	567	301421
RespPr_MoveS2_360	25	75	rechts	weiblich	79	1	rel	links	List3	links.bmp	1	1	303213	1	504	303717
RespPr_MoveS2_360	25	75	rechts	weiblich	80	1	unrel	rechts	List3	links.bmp	1	1	305519	1	430	305949
RespPr_MoveS2_360	25	75	rechts	weiblich	81	1	rel	links	List3	links.bmp	1	1	307745	1	532	308277
RespPr_MoveS2_360	25	75	rechts	weiblich	82	1	rel	links	List3	links.bmp	1	1	310064	1	397	310461
RespPr_MoveS2_360	25	75	rechts	weiblich	83	3	neuAussen	neutralAussen	List3	rechts.bmp	1	3	312263	3	351	312614
RespPr_MoveS2_360	25	75	rechts	weiblich	84	3	neuAussen	neutralAussen	List3	rechts.bmp	1	3	314409	3	428	314837
RespPr_MoveS2_360	25	75	rechts	weiblich	85	1	rel	links	List4	links.bmp	1	1	328338	1	531	328869
RespPr_MoveS2_360	25	75	rechts	weiblich	86	1	unrel	rechts	List4	links.bmp	1	1	330670	1	431	331101
RespPr_MoveS2_360	25	75	rechts	weiblich	87	3	neuInnen	neutralInnen	List4	rechts.bmp	1	3	332896	3	430	333326
RespPr_MoveS2_360	25	75	rechts	weiblich	88	1	neuInnen	neutralInnen	List4	links.bmp	1	1	335109	1	480	335589
RespPr_MoveS2_360	25	75	rechts	weiblich	89	1	unrel	rechts	List4	links.bmp	1	1	337388	1	393	337781
RespPr_MoveS2_360	25	75	rechts	weiblich	90	1	neuAussen	neutralAussen	List4	links.bmp	1	1	339574	1	391	339965
RespPr_MoveS2_360	25	75	rechts	weiblich	91	1	rel	links	List4	links.bmp	1	1	341760	1	461	342221
RespPr_MoveS2_360	25	75	rechts	weiblich	92	1	unrel	rechts	List4	links.bmp	1	1	344013	1	417	344430
RespPr_MoveS2_360	25	75	rechts	weiblich	93	3	rel	rechts	List4	rechts.bmp	1	3	346212	3	481	346693
RespPr_MoveS2_360	25	75	rechts	weiblich	94	1	unrel	rechts	List4	links.bmp	1	1	348478	1	488	348966
RespPr_MoveS2_360	25	75	rechts	weiblich	95	3	rel	rechts	List4	rechts.bmp	1	3	350757	3	448	351205
RespPr_MoveS2_360	25	75	rechts	weiblich	96	1	rel	links	List4	links.bmp	1	1	352996	1	402	353398
RespPr_MoveS2_360	25	75	rechts	weiblich	97	1	rel	links	List4	links.bmp	1	1	355196	1	562	355758
RespPr_MoveS2_360	25	75	rechts	weiblich	98	3	rel	rechts	List4	rechts.bmp	1	3	357555	3	346	357901
RespPr_MoveS2_360	25	75	rechts	weiblich	99	3	rel	rechts	List4	rechts.bmp	1	3	359701	3	408	360109
RespPr_MoveS2_360	25	75	rechts	weiblich	100	3	neuAussen	neutralAussen	List4	rechts.bmp	1	3	361900	3	321	362221
RespPr_MoveS2_360	25	75	rechts	weiblich	101	3	unrel	links	List4	rechts.bmp	1	3	364019	3	466	364485
RespPr_MoveS2_360	25	75	rechts	weiblich	102	3	rel	rechts	List4	rechts.bmp	1	3	366272	3	406	366678
RespPr_MoveS2_360	25	75	rechts	weiblich	103	1	rel	links	List4	links.bmp	1	1	368458	1	475	368933
RespPr_MoveS2_360	25	75	rechts	weiblich	104	1	neuInnen	neutralInnen	List4	links.bmp	1	1	370724	1	449	371173
RespPr_MoveS2_360	25	75	rechts	weiblich	105	3	unrel	links	List4	rechts.bmp	1	3	372963	3	474	373437
RespPr_MoveS2_360	25	75	rechts	weiblich	106	1	rel	links	List4	links.bmp	1	1	375229	1	521	375750
RespPr_MoveS2_360	25	75	rechts	weiblich	107	3	neuInnen	neutralInnen	List4	rechts.bmp	1	3	377535	3	366	377901
RespPr_MoveS2_360	25	75	rechts	weiblich	108	3	neuAussen	neutralAussen	List4	rechts.bmp	1	3	379721	3	396	380117
RespPr_MoveS2_360	25	75	rechts	weiblich	109	1	neuAussen	neutralAussen	List4	links.bmp	1	1	381907	1	418	382325
RespPr_MoveS2_360	25	75	rechts	weiblich	110	1	neuInnen	neutralInnen	List4	links.bmp	1	1	384119	1	430	384549
RespPr_MoveS2_360	25	75	rechts	weiblich	111	3	unrel	links	List4	rechts.bmp	1	3	386345	3	316	386661
RespPr_MoveS2_360	25	75	rechts	weiblich	112	3	neuAussen	neutralAussen	List4	rechts.bmp	1	3	388438	3	367	388805
RespPr_MoveS2_360	25	75	rechts	weiblich	113	1	neuAussen	neutralAussen	List4	links.bmp	1	1	390584	1	621	391205
RespPr_MoveS2_360	25	75	rechts	weiblich	114	1	unrel	rechts	List4	links.bmp	1	1	392997	1	440	393437
RespPr_MoveS2_360	25	75	rechts	weiblich	115	3	unrel	links	List4	rechts.bmp	1	3	395236	3	353	395589
RespPr_MoveS2_360	25	75	rechts	weiblich	116	3	unrel	links	List4	rechts.bmp	1	3	397382	3	367	397749
RespPr_MoveS2_360	25	75	rechts	weiblich	117	3	unrel	links	List4	rechts.bmp	1	3	399541	3	376	399917
RespPr_MoveS2_360	25	75	rechts	weiblich	118	3	neuInnen	neutralInnen	List4	rechts.bmp	1	3	401714	3	387	402101
RespPr_MoveS2_360	25	75	rechts	weiblich	119	1	unrel	rechts	List4	links.bmp	1	1	403900	1	441	404341
RespPr_MoveS2_360	25	75	rechts	weiblich	120	3	rel	rechts	List4	rechts.bmp	1	3	406139	3	499	406638
RespPr_MoveS2_360	25	75	rechts	weiblich	121	1	neuAussen	neutralAussen	List5	links.bmp	1	1	424253	1	585	424838
RespPr_MoveS2_360	25	75	rechts	weiblich	122	3	unrel	links	List5	rechts.bmp	1	3	426639	3	398	427037
RespPr_MoveS2_360	25	75	rechts	weiblich	123	1	rel	links	List5	links.bmp	1	1	428838	1	439	429277
RespPr_MoveS2_360	25	75	rechts	weiblich	124	1	neuInnen	neutralInnen	List5	links.bmp	1	1	431064	1	453	431517
RespPr_MoveS2_360	25	75	rechts	weiblich	125	1	unrel	rechts	List5	links.bmp	1	1	433317	1	513	433830
RespPr_MoveS2_360	25	75	rechts	weiblich	126	3	unrel	links	List5	rechts.bmp	1	3	435622	3	351	435973
RespPr_MoveS2_360	25	75	rechts	weiblich	127	3	rel	rechts	List5	rechts.bmp	1	3	437768	3	485	438253
RespPr_MoveS2_360	25	75	rechts	weiblich	128	3	unrel	links	List5	rechts.bmp	1	3	440048	3	445	440493
RespPr_MoveS2_360	25	75	rechts	weiblich	129	3	neuInnen	neutralInnen	List5	rechts.bmp	1	3	442287	3	446	442733
RespPr_MoveS2_360	25	75	rechts	weiblich	130	1	unrel	rechts	List5	links.bmp	1	1	444526	1	463	444989
RespPr_MoveS2_360	25	75	rechts	weiblich	131	1	rel	links	List5	links.bmp	1	1	446779	1	506	447285
RespPr_MoveS2_360	25	75	rechts	weiblich	132	1	unrel	rechts	List5	links.bmp	1	1	449085	1	464	449549
RespPr_MoveS2_360	25	75	rechts	weiblich	133	3	neuAussen	neutralAussen	List5	rechts.bmp	1	3	451351	3	438	451789
RespPr_MoveS2_360	25	75	rechts	weiblich	134	3	neuInnen	neutralInnen	List5	rechts.bmp	1	3	453590	3	383	453973
RespPr_MoveS2_360	25	75	rechts	weiblich	135	3	rel	rechts	List5	rechts.bmp	1	3	455776	3	405	456181
RespPr_MoveS2_360	25	75	rechts	weiblich	136	3	neuAussen	neutralAussen	List5	rechts.bmp	1	3	457975	3	374	458349
RespPr_MoveS2_360	25	75	rechts	weiblich	137	3	unrel	links	List5	rechts.bmp	1	3	460148	3	385	460533
RespPr_MoveS2_360	25	75	rechts	weiblich	138	3	neuInnen	neutralInnen	List5	rechts.bmp	1	3	462334	3	423	462757
RespPr_MoveS2_360	25	75	rechts	weiblich	139	1	unrel	rechts	List5	links.bmp	1	1	464546	1	339	464885
RespPr_MoveS2_360	25	75	rechts	weiblich	140	3	rel	rechts	List5	rechts.bmp	1	3	466679	3	510	467189
RespPr_MoveS2_360	25	75	rechts	weiblich	141	1	rel	links	List5	links.bmp	1	1	468985	1	340	469325
RespPr_MoveS2_360	25	75	rechts	weiblich	142	1	neuAussen	neutralAussen	List5	links.bmp	0	1	471104	3	357	471461
RespPr_MoveS2_360	25	75	rechts	weiblich	143	1	unrel	rechts	List5	links.bmp	1	1	473250	1	611	473861
RespPr_MoveS2_360	25	75	rechts	weiblich	144	1	rel	links	List5	links.bmp	1	1	475663	1	534	476197
RespPr_MoveS2_360	25	75	rechts	weiblich	145	3	unrel	links	List5	rechts.bmp	1	3	477995	3	458	478453
RespPr_MoveS2_360	25	75	rechts	weiblich	146	3	rel	rechts	List5	rechts.bmp	1	3	480248	3	549	480797
RespPr_MoveS2_360	25	75	rechts	weiblich	147	3	unrel	links	List5	rechts.bmp	1	3	482594	3	571	483165
RespPr_MoveS2_360	25	75	rechts	weiblich	148	1	neuInnen	neutralInnen	List5	links.bmp	1	1	484966	1	503	485469
RespPr_MoveS2_360	25	75	rechts	weiblich	149	1	rel	links	List5	links.bmp	1	1	487259	1	442	487701
RespPr_MoveS2_360	25	75	rechts	weiblich	150	1	unrel	rechts	List5	links.bmp	1	1	489498	1	499	489997
RespPr_MoveS2_360	25	75	rechts	weiblich	151	1	rel	links	List5	links.bmp	1	1	491791	1	478	492269
RespPr_MoveS2_360	25	75	rechts	weiblich	152	1	neuAussen	neutralAussen	List5	links.bmp	1	1	494070	1	447	494517
RespPr_MoveS2_360	25	75	rechts	weiblich	153	1	neuInnen	neutralInnen	List5	links.bmp	1	1	496309	1	520	496829
RespPr_MoveS2_360	25	75	rechts	weiblich	154	3	rel	rechts	List5	rechts.bmp	1	3	498615	3	398	499013
RespPr_MoveS2_360	25	75	rechts	weiblich	155	3	rel	rechts	List5	rechts.bmp	1	3	500814	3	351	501165
RespPr_MoveS2_360	25	75	rechts	weiblich	156	3	neuAussen	neutralAussen	List5	rechts.bmp	1	3	502960	3	405	503365
RespPr_MoveS2_360	26	60	rechts	weiblich	1	1	rel	links	List1	links.bmp	1	1	71329	1	880	72209
RespPr_MoveS2_360	26	60	rechts	weiblich	2	3	unrel	links	List1	rechts.bmp	1	3	74009	3	447	74456
RespPr_MoveS2_360	26	60	rechts	weiblich	3	3	neuAussen	neutralAussen	List1	rechts.bmp	1	3	76248	3	536	76784
RespPr_MoveS2_360	26	60	rechts	weiblich	4	1	rel	links	List1	links.bmp	1	1	78567	1	434	79001
RespPr_MoveS2_360	26	60	rechts	weiblich	5	3	neuInnen	neutralInnen	List1	rechts.bmp	1	3	80793	3	527	81320
RespPr_MoveS2_360	26	60	rechts	weiblich	6	3	unrel	links	List1	rechts.bmp	1	3	83112	3	504	83616
RespPr_MoveS2_360	26	60	rechts	weiblich	7	1	unrel	rechts	List1	links.bmp	1	1	85418	1	446	85864
RespPr_MoveS2_360	26	60	rechts	weiblich	8	1	neuInnen	neutralInnen	List1	links.bmp	1	1	87644	1	588	88232
RespPr_MoveS2_360	26	60	rechts	weiblich	9	3	rel	rechts	List1	rechts.bmp	1	3	90030	3	402	90432
RespPr_MoveS2_360	26	60	rechts	weiblich	10	1	unrel	rechts	List1	links.bmp	1	1	92229	1	395	92624
RespPr_MoveS2_360	26	60	rechts	weiblich	11	3	rel	rechts	List1	rechts.bmp	1	3	94415	3	450	94865
RespPr_MoveS2_360	26	60	rechts	weiblich	12	1	neuAussen	neutralAussen	List1	links.bmp	1	1	96641	1	440	97081
RespPr_MoveS2_360	26	60	rechts	weiblich	13	3	unrel	links	List2	rechts.bmp	1	3	112156	3	476	112632
RespPr_MoveS2_360	26	60	rechts	weiblich	14	1	neuInnen	neutralInnen	List2	links.bmp	1	1	114422	1	371	114793
RespPr_MoveS2_360	26	60	rechts	weiblich	15	1	neuAussen	neutralAussen	List2	links.bmp	1	1	116594	1	590	117184
RespPr_MoveS2_360	26	60	rechts	weiblich	16	1	rel	links	List2	links.bmp	1	1	118967	1	433	119400
RespPr_MoveS2_360	26	60	rechts	weiblich	17	3	neuAussen	neutralAussen	List2	rechts.bmp	1	3	121193	3	567	121760
RespPr_MoveS2_360	26	60	rechts	weiblich	18	3	unrel	links	List2	rechts.bmp	1	3	123552	3	496	124048
RespPr_MoveS2_360	26	60	rechts	weiblich	19	1	unrel	rechts	List2	links.bmp	1	1	125845	1	411	126256
RespPr_MoveS2_360	26	60	rechts	weiblich	20	1	neuAussen	neutralAussen	List2	links.bmp	1	1	128044	1	452	128496
RespPr_MoveS2_360	26	60	rechts	weiblich	21	1	rel	links	List2	links.bmp	1	1	130297	1	511	130808
RespPr_MoveS2_360	26	60	rechts	weiblich	22	1	neuInnen	neutralInnen	List2	links.bmp	1	1	132602	1	502	133104
RespPr_MoveS2_360	26	60	rechts	weiblich	23	1	neuAussen	neutralAussen	List2	links.bmp	1	1	134895	1	433	135328
RespPr_MoveS2_360	26	60	rechts	weiblich	24	3	rel	rechts	List2	rechts.bmp	1	3	137121	3	679	137800
RespPr_MoveS2_360	26	60	rechts	weiblich	25	1	unrel	rechts	List2	links.bmp	1	1	139600	1	449	140049
RespPr_MoveS2_360	26	60	rechts	weiblich	26	1	rel	links	List2	links.bmp	1	1	141839	1	561	142400
RespPr_MoveS2_360	26	60	rechts	weiblich	27	3	rel	rechts	List2	rechts.bmp	1	3	144199	3	410	144609
RespPr_MoveS2_360	26	60	rechts	weiblich	28	1	unrel	rechts	List2	links.bmp	1	1	146398	1	402	146800
RespPr_MoveS2_360	26	60	rechts	weiblich	29	1	unrel	rechts	List2	links.bmp	1	1	148597	1	435	149032
RespPr_MoveS2_360	26	60	rechts	weiblich	30	3	neuInnen	neutralInnen	List2	rechts.bmp	1	3	150823	3	401	151224
RespPr_MoveS2_360	26	60	rechts	weiblich	31	3	neuAussen	neutralAussen	List2	rechts.bmp	1	3	153009	3	488	153497
RespPr_MoveS2_360	26	60	rechts	weiblich	32	1	rel	links	List2	links.bmp	1	1	155275	1	374	155649
RespPr_MoveS2_360	26	60	rechts	weiblich	33	1	unrel	rechts	List2	links.bmp	1	1	157448	1	416	157864
RespPr_MoveS2_360	26	60	rechts	weiblich	34	3	neuInnen	neutralInnen	List2	rechts.bmp	1	3	159660	3	389	160049
RespPr_MoveS2_360	26	60	rechts	weiblich	35	3	neuInnen	neutralInnen	List2	rechts.bmp	1	3	161846	3	458	162304
RespPr_MoveS2_360	26	60	rechts	weiblich	36	1	rel	links	List2	links.bmp	1	1	164099	1	397	164496
RespPr_MoveS2_360	26	60	rechts	weiblich	37	1	unrel	rechts	List2	links.bmp	1	1	166298	1	406	166704
RespPr_MoveS2_360	26	60	rechts	weiblich	38	3	rel	rechts	List2	rechts.bmp	1	3	168484	3	348	168832
RespPr_MoveS2_360	26	60	rechts	weiblich	39	3	neuAussen	neutralAussen	List2	rechts.bmp	1	3	170630	3	426	171056
RespPr_MoveS2_360	26	60	rechts	weiblich	40	3	unrel	links	List2	rechts.bmp	1	3	172856	3	353	173209
RespPr_MoveS2_360	26	60	rechts	weiblich	41	3	unrel	links	List2	rechts.bmp	1	3	175002	3	494	175496
RespPr_MoveS2_360	26	60	rechts	weiblich	42	3	rel	rechts	List2	rechts.bmp	1	3	177281	3	456	177737
RespPr_MoveS2_360	26	60	rechts	weiblich	43	3	unrel	links	List2	rechts.bmp	1	3	179534	3	458	179992
RespPr_MoveS2_360	26	60	rechts	weiblich	44	1	rel	links	List2	links.bmp	1	1	181786	1	462	182248
RespPr_MoveS2_360	26	60	rechts	weiblich	45	3	rel	rechts	List2	rechts.bmp	1	3	184039	3	498	184537
RespPr_MoveS2_360	26	60	rechts	weiblich	46	1	neuInnen	neutralInnen	List2	links.bmp	1	1	186318	1	434	186752
RespPr_MoveS2_360	26	60	rechts	weiblich	47	3	rel	rechts	List2	rechts.bmp	1	3	188544	3	368	188912
RespPr_MoveS2_360	26	60	rechts	weiblich	48	3	unrel	links	List2	rechts.bmp	1	3	190770	3	430	191200
RespPr_MoveS2_360	26	60	rechts	weiblich	49	1	unrel	rechts	List3	links.bmp	1	1	207324	1	452	207776
RespPr_MoveS2_360	26	60	rechts	weiblich	50	3	unrel	links	List3	rechts.bmp	1	3	209577	3	383	209960
RespPr_MoveS2_360	26	60	rechts	weiblich	51	3	rel	rechts	List3	rechts.bmp	1	3	211750	3	546	212296
RespPr_MoveS2_360	26	60	rechts	weiblich	52	3	unrel	links	List3	rechts.bmp	1	3	214096	3	432	214528
RespPr_MoveS2_360	26	60	rechts	weiblich	53	3	rel	rechts	List3	rechts.bmp	1	3	216321	3	383	216704
RespPr_MoveS2_360	26	60	rechts	weiblich	54	3	unrel	links	List3	rechts.bmp	1	3	218494	3	410	218904
RespPr_MoveS2_360	26	60	rechts	weiblich	55	3	unrel	links	List3	rechts.bmp	1	3	220707	3	389	221096
RespPr_MoveS2_360	26	60	rechts	weiblich	56	3	neuInnen	neutralInnen	List3	rechts.bmp	1	3	222893	3	355	223248
RespPr_MoveS2_360	26	60	rechts	weiblich	57	1	unrel	rechts	List3	links.bmp	1	1	225039	1	394	225433
RespPr_MoveS2_360	26	60	rechts	weiblich	58	1	neuAussen	neutralAussen	List3	links.bmp	1	1	227225	1	503	227728
RespPr_MoveS2_360	26	60	rechts	weiblich	59	3	neuInnen	neutralInnen	List3	rechts.bmp	1	3	229530	3	414	229944
RespPr_MoveS2_360	26	60	rechts	weiblich	60	1	rel	links	List3	links.bmp	1	1	231743	1	433	232176
RespPr_MoveS2_360	26	60	rechts	weiblich	61	1	rel	links	List3	links.bmp	1	1	233969	1	511	234480
RespPr_MoveS2_360	26	60	rechts	weiblich	62	3	neuAussen	neutralAussen	List3	rechts.bmp	1	3	236275	3	485	236760
RespPr_MoveS2_360	26	60	rechts	weiblich	63	3	unrel	links	List3	rechts.bmp	1	3	238554	3	454	239008
RespPr_MoveS2_360	26	60	rechts	weiblich	64	3	neuAussen	neutralAussen	List3	rechts.bmp	1	3	240807	3	393	241200
RespPr_MoveS2_360	26	60	rechts	weiblich	65	1	neuAussen	neutralAussen	List3	links.bmp	1	1	242993	1	440	243433
RespPr_MoveS2_360	26	60	rechts	weiblich	66	1	unrel	rechts	List3	links.bmp	1	1	245232	1	416	245648
RespPr_MoveS2_360	26	60	rechts	weiblich	67	1	neuAussen	neutralAussen	List3	links.bmp	1	1	247444	1	325	247769
RespPr_MoveS2_360	26	60	rechts	weiblich	68	3	rel	rechts	List3	rechts.bmp	1	3	249564	3	356	249920
RespPr_MoveS2_360	26	60	rechts	weiblich	69	1	neuInnen	neutralInnen	List3	links.bmp	1	1	251710	1	482	252192
RespPr_MoveS2_360	26	60	rechts	weiblich	70	3	neuAussen	neutralAussen	List3	rechts.bmp	1	3	253989	3	387	254376
RespPr_MoveS2_360	26	60	rechts	weiblich	71	1	rel	links	List3	links.bmp	1	1	256175	1	409	256584
RespPr_MoveS2_360	26	60	rechts	weiblich	72	1	neuInnen	neutralInnen	List3	links.bmp	1	1	258374	1	434	258808
RespPr_MoveS2_360	26	60	rechts	weiblich	73	1	rel	links	List3	links.bmp	1	1	260600	1	400	261000
RespPr_MoveS2_360	26	60	rechts	weiblich	74	1	rel	links	List3	links.bmp	1	1	262799	1	386	263185
RespPr_MoveS2_360	26	60	rechts	weiblich	75	1	neuInnen	neutralInnen	List3	links.bmp	1	1	264972	1	397	265369
RespPr_MoveS2_360	26	60	rechts	weiblich	76	1	unrel	rechts	List3	links.bmp	1	1	267158	1	386	267544
RespPr_MoveS2_360	26	60	rechts	weiblich	77	3	rel	rechts	List3	rechts.bmp	1	3	269344	3	424	269768
RespPr_MoveS2_360	26	60	rechts	weiblich	78	1	rel	links	List3	links.bmp	1	1	271570	1	455	272025
RespPr_MoveS2_360	26	60	rechts	weiblich	79	3	rel	rechts	List3	rechts.bmp	1	3	273822	3	379	274201
RespPr_MoveS2_360	26	60	rechts	weiblich	80	3	rel	rechts	List3	rechts.bmp	1	3	275995	3	365	276360
RespPr_MoveS2_360	26	60	rechts	weiblich	81	3	neuInnen	neutralInnen	List3	rechts.bmp	1	3	278141	3	395	278536
RespPr_MoveS2_360	26	60	rechts	weiblich	82	1	unrel	rechts	List3	links.bmp	1	1	280327	1	417	280744
RespPr_MoveS2_360	26	60	rechts	weiblich	83	3	unrel	links	List3	rechts.bmp	1	3	282540	3	348	282888
RespPr_MoveS2_360	26	60	rechts	weiblich	84	1	unrel	rechts	List3	links.bmp	1	1	284686	1	386	285072
RespPr_MoveS2_360	26	60	rechts	weiblich	85	1	rel	links	List4	links.bmp	1	1	301240	1	432	301672
RespPr_MoveS2_360	26	60	rechts	weiblich	86	3	rel	rechts	List4	rechts.bmp	1	3	303466	3	327	303793
RespPr_MoveS2_360	26	60	rechts	weiblich	87	3	neuInnen	neutralInnen	List4	rechts.bmp	1	3	305572	3	428	306000
RespPr_MoveS2_360	26	60	rechts	weiblich	88	3	unrel	links	List4	rechts.bmp	1	3	307798	3	362	308160
RespPr_MoveS2_360	26	60	rechts	weiblich	89	3	neuInnen	neutralInnen	List4	rechts.bmp	1	3	309957	3	339	310296
RespPr_MoveS2_360	26	60	rechts	weiblich	90	1	rel	links	List4	links.bmp	1	1	312090	1	335	312425
RespPr_MoveS2_360	26	60	rechts	weiblich	91	1	neuAussen	neutralAussen	List4	links.bmp	1	1	314222	1	354	314576
RespPr_MoveS2_360	26	60	rechts	weiblich	92	1	rel	links	List4	links.bmp	1	1	316355	1	405	316760
RespPr_MoveS2_360	26	60	rechts	weiblich	93	1	rel	links	List4	links.bmp	1	1	318541	1	444	318985
RespPr_MoveS2_360	26	60	rechts	weiblich	94	1	neuInnen	neutralInnen	List4	links.bmp	1	1	320780	1	460	321240
RespPr_MoveS2_360	26	60	rechts	weiblich	95	3	neuAussen	neutralAussen	List4	rechts.bmp	1	3	323033	3	535	323568
RespPr_MoveS2_360	26	60	rechts	weiblich	96	1	unrel	rechts	List4	links.bmp	1	1	325365	1	467	325832
RespPr_MoveS2_360	26	60	rechts	weiblich	97	1	rel	links	List4	links.bmp	1	1	327618	1	398	328016
RespPr_MoveS2_360	26	60	rechts	weiblich	98	3	neuAussen	neutralAussen	List4	rechts.bmp	1	3	329817	3	431	330248
RespPr_MoveS2_360	26	60	rechts	weiblich	99	3	rel	rechts	List4	rechts.bmp	1	3	332043	3	533	332576
RespPr_MoveS2_360	26	60	rechts	weiblich	100	1	unrel	rechts	List4	links.bmp	1	1	334376	1	361	334737
RespPr_MoveS2_360	26	60	rechts	weiblich	101	3	rel	rechts	List4	rechts.bmp	1	3	336535	3	346	336881
RespPr_MoveS2_360	26	60	rechts	weiblich	102	1	neuAussen	neutralAussen	List4	links.bmp	1	1	338681	1	351	339032
RespPr_MoveS2_360	26	60	rechts	weiblich	103	1	unrel	rechts	List4	links.bmp	1	1	340827	1	558	341385
RespPr_MoveS2_360	26	60	rechts	weiblich	104	1	unrel	rechts	List4	links.bmp	1	1	343186	1	510	343696
RespPr_MoveS2_360	26	60	rechts	weiblich	105	3	rel	rechts	List4	rechts.bmp	1	3	345492	3	405	345897
RespPr_MoveS2_360	26	60	rechts	weiblich	106	1	neuAussen	neutralAussen	List4	links.bmp	1	1	347678	1	434	348112
RespPr_MoveS2_360	26	60	rechts	weiblich	107	3	unrel	links	List4	rechts.bmp	1	3	349904	3	449	350353
RespPr_MoveS2_360	26	60	rechts	weiblich	108	1	rel	links	List4	links.bmp	1	1	352143	1	594	352737
RespPr_MoveS2_360	26	60	rechts	weiblich	109	3	unrel	links	List4	rechts.bmp	1	3	354529	3	480	355009
RespPr_MoveS2_360	26	60	rechts	weiblich	110	3	neuInnen	neutralInnen	List4	rechts.bmp	1	3	356795	3	493	357288
RespPr_MoveS2_360	26	60	rechts	weiblich	111	3	unrel	links	List4	rechts.bmp	1	3	359088	3	401	359489
RespPr_MoveS2_360	26	60	rechts	weiblich	112	3	rel	rechts	List4	rechts.bmp	1	3	361287	3	433	361720
RespPr_MoveS2_360	26	60	rechts	weiblich	113	1	unrel	rechts	List4	links.bmp	1	1	363513	1	375	363888
RespPr_MoveS2_360	26	60	rechts	weiblich	114	3	unrel	links	List4	rechts.bmp	1	3	365685	3	371	366056
RespPr_MoveS2_360	26	60	rechts	weiblich	115	1	neuInnen	neutralInnen	List4	links.bmp	1	1	367858	1	422	368280
RespPr_MoveS2_360	26	60	rechts	weiblich	116	3	rel	rechts	List4	rechts.bmp	1	3	370071	3	345	370416
RespPr_MoveS2_360	26	60	rechts	weiblich	117	3	neuAussen	neutralAussen	List4	rechts.bmp	1	3	372217	3	399	372616
RespPr_MoveS2_360	26	60	rechts	weiblich	118	3	unrel	links	List4	rechts.bmp	1	3	374416	3	368	374784
RespPr_MoveS2_360	26	60	rechts	weiblich	119	1	neuInnen	neutralInnen	List4	links.bmp	1	1	376575	1	457	377032
RespPr_MoveS2_360	26	60	rechts	weiblich	120	1	unrel	rechts	List4	links.bmp	1	1	378828	1	380	379208
RespPr_MoveS2_360	26	60	rechts	weiblich	121	1	rel	links	List5	links.bmp	1	1	392623	1	441	393064
RespPr_MoveS2_360	26	60	rechts	weiblich	122	1	rel	links	List5	links.bmp	1	1	394862	1	466	395328
RespPr_MoveS2_360	26	60	rechts	weiblich	123	1	unrel	rechts	List5	links.bmp	1	1	397115	1	550	397665
RespPr_MoveS2_360	26	60	rechts	weiblich	124	3	neuInnen	neutralInnen	List5	rechts.bmp	1	3	399461	3	379	399840
RespPr_MoveS2_360	26	60	rechts	weiblich	125	1	rel	links	List5	links.bmp	1	1	401633	1	399	402032
RespPr_MoveS2_360	26	60	rechts	weiblich	126	1	neuAussen	neutralAussen	List5	links.bmp	1	1	403833	1	392	404225
RespPr_MoveS2_360	26	60	rechts	weiblich	127	1	rel	links	List5	links.bmp	1	1	406019	1	349	406368
RespPr_MoveS2_360	26	60	rechts	weiblich	128	3	rel	rechts	List5	rechts.bmp	1	3	408165	3	315	408480
RespPr_MoveS2_360	26	60	rechts	weiblich	129	1	neuAussen	neutralAussen	List5	links.bmp	1	1	410271	1	393	410664
RespPr_MoveS2_360	26	60	rechts	weiblich	130	3	rel	rechts	List5	rechts.bmp	0	3	412457	1	399	412856
RespPr_MoveS2_360	26	60	rechts	weiblich	131	3	neuInnen	neutralInnen	List5	rechts.bmp	1	3	414656	3	464	415120
RespPr_MoveS2_360	26	60	rechts	weiblich	132	3	rel	rechts	List5	rechts.bmp	1	3	416922	3	391	417313
RespPr_MoveS2_360	26	60	rechts	weiblich	133	3	neuInnen	neutralInnen	List5	rechts.bmp	1	3	419108	3	413	419521
RespPr_MoveS2_360	26	60	rechts	weiblich	134	3	neuAussen	neutralAussen	List5	rechts.bmp	1	3	421307	3	350	421657
RespPr_MoveS2_360	26	60	rechts	weiblich	135	1	unrel	rechts	List5	links.bmp	1	1	423453	1	356	423809
RespPr_MoveS2_360	26	60	rechts	weiblich	136	3	rel	rechts	List5	rechts.bmp	1	3	425599	3	457	426056
RespPr_MoveS2_360	26	60	rechts	weiblich	137	3	rel	rechts	List5	rechts.bmp	1	3	427851	3	421	428272
RespPr_MoveS2_360	26	60	rechts	weiblich	138	1	rel	links	List5	links.bmp	1	1	430064	1	400	430464
RespPr_MoveS2_360	26	60	rechts	weiblich	139	1	neuInnen	neutralInnen	List5	links.bmp	1	1	432250	1	414	432664
RespPr_MoveS2_360	26	60	rechts	weiblich	140	3	neuAussen	neutralAussen	List5	rechts.bmp	1	3	434463	3	313	434776
RespPr_MoveS2_360	26	60	rechts	weiblich	141	1	neuAussen	neutralAussen	List5	links.bmp	1	1	436569	1	447	437016
RespPr_MoveS2_360	26	60	rechts	weiblich	142	1	rel	links	List5	links.bmp	1	1	438808	1	384	439192
RespPr_MoveS2_360	26	60	rechts	weiblich	143	1	unrel	rechts	List5	links.bmp	1	1	440994	1	439	441433
RespPr_MoveS2_360	26	60	rechts	weiblich	144	1	neuInnen	neutralInnen	List5	links.bmp	1	1	443233	1	367	443600
RespPr_MoveS2_360	26	60	rechts	weiblich	145	1	unrel	rechts	List5	links.bmp	1	1	445379	1	334	445713
RespPr_MoveS2_360	26	60	rechts	weiblich	146	3	unrel	links	List5	rechts.bmp	1	3	447512	3	320	447832
RespPr_MoveS2_360	26	60	rechts	weiblich	147	3	unrel	links	List5	rechts.bmp	1	3	449631	3	345	449976
RespPr_MoveS2_360	26	60	rechts	weiblich	148	3	unrel	links	List5	rechts.bmp	1	3	451777	3	351	452128
RespPr_MoveS2_360	26	60	rechts	weiblich	149	3	unrel	links	List5	rechts.bmp	1	3	453923	3	349	454272
RespPr_MoveS2_360	26	60	rechts	weiblich	150	1	neuInnen	neutralInnen	List5	links.bmp	1	1	456069	1	363	456432
RespPr_MoveS2_360	26	60	rechts	weiblich	151	1	unrel	rechts	List5	links.bmp	1	1	458228	1	380	458608
RespPr_MoveS2_360	26	60	rechts	weiblich	152	3	unrel	links	List5	rechts.bmp	1	3	460401	3	512	460913
RespPr_MoveS2_360	26	60	rechts	weiblich	153	3	rel	rechts	List5	rechts.bmp	1	3	462707	3	389	463096
RespPr_MoveS2_360	26	60	rechts	weiblich	154	3	neuAussen	neutralAussen	List5	rechts.bmp	0	3	464893	1	347	465240
RespPr_MoveS2_360	26	60	rechts	weiblich	155	3	unrel	links	List5	rechts.bmp	1	3	467039	3	353	467392
RespPr_MoveS2_360	26	60	rechts	weiblich	156	1	unrel	rechts	List5	links.bmp	1	1	469184	1	600	469784
RespPr_MoveS2_360	27	68	rechts	weiblich	1	3	neuAussen	neutralAussen	List1	rechts.bmp	1	3	147619	3	1031	148650
RespPr_MoveS2_360	27	68	rechts	weiblich	2	1	rel	links	List1	links.bmp	1	1	150445	1	669	151114
RespPr_MoveS2_360	27	68	rechts	weiblich	3	3	rel	rechts	List1	rechts.bmp	1	3	152911	3	523	153434
RespPr_MoveS2_360	27	68	rechts	weiblich	4	3	rel	rechts	List1	rechts.bmp	1	3	155217	3	521	155738
RespPr_MoveS2_360	27	68	rechts	weiblich	5	3	unrel	links	List1	rechts.bmp	1	3	157536	3	570	158106
RespPr_MoveS2_360	27	68	rechts	weiblich	6	1	neuAussen	neutralAussen	List1	links.bmp	1	1	159895	1	594	160489
RespPr_MoveS2_360	27	68	rechts	weiblich	7	3	unrel	links	List1	rechts.bmp	1	3	162268	3	597	162865
RespPr_MoveS2_360	27	68	rechts	weiblich	8	3	neuInnen	neutralInnen	List1	rechts.bmp	1	3	164667	3	646	165313
RespPr_MoveS2_360	27	68	rechts	weiblich	9	1	neuInnen	neutralInnen	List1	links.bmp	1	1	167106	1	615	167721
RespPr_MoveS2_360	27	68	rechts	weiblich	10	1	unrel	rechts	List1	links.bmp	1	1	169519	1	514	170033
RespPr_MoveS2_360	27	68	rechts	weiblich	11	1	rel	links	List1	links.bmp	1	1	171825	1	608	172433
RespPr_MoveS2_360	27	68	rechts	weiblich	12	1	unrel	rechts	List1	links.bmp	1	1	174224	1	569	174793
RespPr_MoveS2_360	27	68	rechts	weiblich	13	3	neuInnen	neutralInnen	List2	rechts.bmp	1	3	195177	3	545	195722
RespPr_MoveS2_360	27	68	rechts	weiblich	14	1	neuAussen	neutralAussen	List2	links.bmp	1	1	197523	1	487	198010
RespPr_MoveS2_360	27	68	rechts	weiblich	15	3	unrel	links	List2	rechts.bmp	1	3	199802	3	471	200273
RespPr_MoveS2_360	27	68	rechts	weiblich	16	3	neuAussen	neutralAussen	List2	rechts.bmp	1	3	202068	3	581	202649
RespPr_MoveS2_360	27	68	rechts	weiblich	17	1	neuInnen	neutralInnen	List2	links.bmp	1	1	204441	1	521	204962
RespPr_MoveS2_360	27	68	rechts	weiblich	18	3	unrel	links	List2	rechts.bmp	1	3	206760	3	402	207162
RespPr_MoveS2_360	27	68	rechts	weiblich	19	3	rel	rechts	List2	rechts.bmp	1	3	208959	3	554	209513
RespPr_MoveS2_360	27	68	rechts	weiblich	20	1	neuInnen	neutralInnen	List2	links.bmp	1	1	211305	1	505	211810
RespPr_MoveS2_360	27	68	rechts	weiblich	21	3	rel	rechts	List2	rechts.bmp	1	3	213611	3	463	214074
RespPr_MoveS2_360	27	68	rechts	weiblich	22	1	unrel	rechts	List2	links.bmp	1	1	215864	1	490	216354
RespPr_MoveS2_360	27	68	rechts	weiblich	23	3	neuAussen	neutralAussen	List2	rechts.bmp	1	3	218156	3	414	218570
RespPr_MoveS2_360	27	68	rechts	weiblich	24	1	unrel	rechts	List2	links.bmp	1	1	220369	1	512	220881
RespPr_MoveS2_360	27	68	rechts	weiblich	25	1	neuInnen	neutralInnen	List2	links.bmp	1	1	222675	1	583	223258
RespPr_MoveS2_360	27	68	rechts	weiblich	26	3	unrel	links	List2	rechts.bmp	1	3	225047	3	482	225529
RespPr_MoveS2_360	27	68	rechts	weiblich	27	1	unrel	rechts	List2	links.bmp	1	1	227326	1	443	227769
RespPr_MoveS2_360	27	68	rechts	weiblich	28	1	rel	links	List2	links.bmp	1	1	229566	1	524	230090
RespPr_MoveS2_360	27	68	rechts	weiblich	29	1	neuAussen	neutralAussen	List2	links.bmp	1	1	231885	1	493	232378
RespPr_MoveS2_360	27	68	rechts	weiblich	30	3	neuAussen	neutralAussen	List2	rechts.bmp	1	3	234178	3	431	234609
RespPr_MoveS2_360	27	68	rechts	weiblich	31	3	rel	rechts	List2	rechts.bmp	1	3	236403	3	486	236889
RespPr_MoveS2_360	27	68	rechts	weiblich	32	1	rel	links	List2	links.bmp	1	1	238683	1	495	239178
RespPr_MoveS2_360	27	68	rechts	weiblich	33	3	unrel	links	List2	rechts.bmp	1	3	240962	3	384	241346
RespPr_MoveS2_360	27	68	rechts	weiblich	34	3	neuInnen	neutralInnen	List2	rechts.bmp	1	3	243148	3	446	243594
RespPr_MoveS2_360	27	68	rechts	weiblich	35	3	rel	rechts	List2	rechts.bmp	1	3	245387	3	615	246002
RespPr_MoveS2_360	27	68	rechts	weiblich	36	3	rel	rechts	List2	rechts.bmp	1	3	247800	3	442	248242
RespPr_MoveS2_360	27	68	rechts	weiblich	37	3	unrel	links	List2	rechts.bmp	1	3	250039	3	442	250481
RespPr_MoveS2_360	27	68	rechts	weiblich	38	1	unrel	rechts	List2	links.bmp	1	1	252278	1	388	252666
RespPr_MoveS2_360	27	68	rechts	weiblich	39	3	unrel	links	List2	rechts.bmp	1	3	254464	3	346	254810
RespPr_MoveS2_360	27	68	rechts	weiblich	40	1	rel	links	List2	links.bmp	1	1	256610	1	496	257106
RespPr_MoveS2_360	27	68	rechts	weiblich	41	1	rel	links	List2	links.bmp	1	1	258903	1	515	259418
RespPr_MoveS2_360	27	68	rechts	weiblich	42	1	rel	links	List2	links.bmp	1	1	261209	1	465	261674
RespPr_MoveS2_360	27	68	rechts	weiblich	43	1	neuAussen	neutralAussen	List2	links.bmp	1	1	263475	1	415	263890
RespPr_MoveS2_360	27	68	rechts	weiblich	44	1	unrel	rechts	List2	links.bmp	1	1	265687	1	419	266106
RespPr_MoveS2_360	27	68	rechts	weiblich	45	3	neuInnen	neutralInnen	List2	rechts.bmp	1	3	267900	3	661	268561
RespPr_MoveS2_360	27	68	rechts	weiblich	46	1	rel	links	List2	links.bmp	1	1	270339	1	486	270825
RespPr_MoveS2_360	27	68	rechts	weiblich	47	3	rel	rechts	List2	rechts.bmp	1	3	272618	3	464	273082
RespPr_MoveS2_360	27	68	rechts	weiblich	48	1	unrel	rechts	List2	links.bmp	1	1	274884	1	493	275377
RespPr_MoveS2_360	27	68	rechts	weiblich	49	3	rel	rechts	List3	rechts.bmp	1	3	284907	3	478	285385
RespPr_MoveS2_360	27	68	rechts	weiblich	50	3	neuAussen	neutralAussen	List3	rechts.bmp	1	3	287187	3	479	287666
[truncated: 754,859 more chars]
